# Supplementary material for: A FRET-based study reveals site-specific regulation of spindle position checkpoint proteins at yeast centrosomes
Source: eLife. 2016 May 9;5:e14029. doi: 10.7554/eLife.14029 (PMC4878874; doi:10.7554/eLife.14029)
Supplement: Figure 1—figure supplement 2—source data 1. — DOI: http://dx.doi.org/10.7554/eLife.14029.007 [file elife-14029-fig1-figsupp2-data1.xls]

## Sheet: Description
Description:
List of Abbreviations
Raw Mean Fluoresence Intensity before bleach (Donor/Aceptor): FL (DA) bb
Raw Mean Fluoresence Intensity before bleach (Donor only): FL (D) bb
Raw Mean Fluoresence Intensity before bleach (Background): FL (bg) bb
Raw Mean Fluoresence Intensity after bleach (Donor/Aceptor): FL (DA) ab
Raw Mean Fluoresence Intensity after bleach (Donor only): FL (D) ab
RawMean Fluoresence Intensity after bleach (Background): FL (bg) ab
Calculated FRET efficiency % for the indicated Donor/Acceptor pai) : FRET % (DA)
Calculated FRET efficiency % background for Donor only sample : FRET % (D)

## Sheet: Experiment1 
pair: Spc42-mTUR Cnm67-EYFP									pair: Spc110-mTUR Cnm67-EYFP
condition: cycling cells Olympus Excellance ScanR software for segmentation analysis									condition: cycling cells Olympus Excellance ScanR software for segmentation analysis
P=0,001*10¯⁸									P=0,03
FRET (D) %	FRET(DA) %								FRET (D) %	FRET(DA) %
-36.985	-22.445								0.2364	10.864
-36.355	-21.075								-2.5931	6.4832
-33.905	-15.625								-2.925	-0.0597
-33.605	-14.885								2.9119	11.3973
-27.565	-11.345								7.6711	7.6564
-27.265	-11.025								2.39744	9.7527
-26.845	-8.785								-1.7602	-0.0233
-23.625	-8.285								6.5545	16.981
-21.245	-7.925								-0.8908	-4.1689
-19.075	-7.445								-2.2063	-7.4641
-18.695	-6.145								1.94678	10.4412
-18.165	-6.015								7.3373	10.5615
-17.385	-5.845								-5.2463	-4.057
-16.995	-5.315								5.2042	-0.2535
-16.755	-4.015								-6.6029	0.6138
-16.675	-3.935								-4.9957	14.897
-16.615	-3.585								0.2272	18.489
-16.565	-3.465								-2.1485	-8.697
-16.485	-3.285								-2.949	-4.3355
-16.305	-3.025								-3.5767	7.5703
-14.725	-3.015								-7.7971	-16.934
-14.595	-2.595								-2.2096	2.60049
-13.875	-2.555								4.0078	9.0323
-13.165	-2.255								-1.0338	13.364
-12.595	0.455								-0.2457	-2.0279
-12.505	0.895								-4.4823	0.1028
-12.275	1.045								-1.6702	7.0493
-12.165	1.295								-6.201	8.1486
-12.145	1.345								5.7022	13.867
-11.855	1.795								5.906	1.77475
-11.605	2.055								3.7512	-3.5714
-11.175	2.165								7.858	7.4062
-11.165	2.565								2.23841	5.2818
-11.025	3.445								1.46177	-1.2444
-10.665	3.615								9.5028	-0.9025
-9.975	3.685								-3.4985	9.2569
-9.635	3.845								-2.9695	-2.0628
-9.565	4.085								-0.9927	-6.8708
-9.315	4.835								0.0057	0.1522
-9.235	5.025								5.034	-2.0566
-8.615	5.025								3.5869	13.13
-7.615	5.095								-4.1374	5.3143
-7.395	5.165								2.68675	-5.5865
-7.365	5.375								-0.0798	-3.9439
-6.755	5.635								7.4161	-2.2885
-6.185	5.645								-8.0989	2.49722
-6.025	5.935								-0.4654	-0.4963
-5.805	6.045								-5.7954	-0.3228
-5.775	6.115								10.2103	16.907
-5.705	6.215								-1.0152	11.948
-5.555	6.435								0.008	2.78533
-5.405	6.455								-5.075	8.6003
-5.205	6.555								2.67513	9.1809
-4.795	6.595								-1.9725	-0.0876
-4.695	6.905								5.6752	-0.702
-4.515	6.915								-7.1324	-7.1227
-4.365	7.105								0.7982	9.7092
-4.155	7.225								5.7515	-2.4908
-3.315	7.675								-4.9845	1.79486
-3.195	7.905								0.4752	-9.305
-2.805	8.035								-2.5328	2.15098
-2.775	8.265								3.9202	10.0125
-2.715	8.465								4.7277	-3.6379
-2.305	8.495								4.3063	11.8394
-2.255	8.535								4.0161	-1.2537
-2.235	8.585								6.3446	-7.4783
-2.105	8.855								2.12117	0.1582
-1.965	8.985								0.0002	1.93478
-1.905	9.555								7.9272	6.3798
-1.845	9.595								-2.4047	4.9355
-1.645	9.685								4.535	9.846
-1.645	9.795								-0.8006	11.7917
-1.575	9.825								-0.2459	0.0712
-1.425	9.885								-0.7022	-5.3121
-1.145	10.155								2.23128	-5.6245
-0.885	10.655								17.908	-3.6424
-0.685	10.775								-7.5203	-2.7445
-0.645	10.905								0.7047	0.3272
-0.345	11.395								-7.8066	6.8229
-0.205	11.455								-6.4221	-1.8871
0.205	11.695								4.7015	-18.051
0.295	11.705								-4.6606	7.9826
0.775	11.815								1.89308	10.1555
1.715	12.325								-4.7032	4.6942
1.775	12.375								-6.3434	1.27906
2.325	12.835								-3.7522	9.4541
2.435	12.945								-3.314	-4.3463
2.505	12.955								4.5601	2.58693
3.365	13.315								-3.032	2.9026
3.385	13.365								6.7658	15.232
4.425	13.455								0.172	-6.6533
4.475	13.545								11.1304	4.3715
4.815	13.595								-4.9453	11.5684
4.845	13.785								-1.8575	8.3059
5.215	13.865								1.49485	-1.6123
5.435	14.065								-2.8674	-7.2235
5.445	14.225								2.37966	4.9709
5.615	14.295								12.194	12.237
5.775	14.425								-3.9348	0.95344
5.805	14.445								-0.2557	-4.7705
5.985	14.555								1.83013	17.67
6.195	14.645								0.6576	5.554
6.665	14.665								-1.2494	0.2097
6.995	14.795								6.131	-1.484
7.015	14.925								9.7748	-2.6004
7.605	15.095								2.9022	-2.4166
7.715	15.115								-1.2023	14.463
7.735	15.225								-1.5064	-10.105
8.005	15.375								9.9943	3.4845
8.895	15.575								8.2492	14.861
9.155	16.045								4.9075	1.88632
9.735	16.235								6.9238	19.146
10.045	16.405								3.8459	9.148
10.365	16.445								0.6269	5.8132
10.385	16.545								-4.6166	-4.703
10.405	16.985								0.6538	-13.22
11.675	17.555								-3.9034	9.289
12.175	17.735								-2.9399	-1.0764
12.555	17.895								3.9021	-5.7366
12.715	18.115								12.466	-1.4282
12.745	18.175								3.8054	-11.876
13.375	18.305								6.303	0.6294
13.405	18.515								-0.9774	-5.1621
14.015	18.955								0.0257	0.2375
14.595	19.105								8.2902	5.5043
15.355	19.115								0.456	6.5448
15.465	19.165								-2.822	6.8554
15.615	19.285								-6.4257	-3.1787
15.705	19.605								-2.4273	-3.8219
15.725	19.625								-3.4043	-8.0513
16.125	19.995								-4.5249	5.7819
16.385	20.065								-0.4637	-7.7514
16.525	20.285								-7.9126	-9.449
17.495	20.935								-6.7949	-9.347
17.665	21.545								1.63772	-3.0613
18.095	21.665								1.59245	6.2451
18.695	22.095								-0.7484	-4.7952
19.715	22.385								-4.5272	-0.528
21.675	22.495								0.5148	-2.263
21.775	22.585								-2.5756	-5.0657
21.835	23.275								-15.774	-0.6112
22.295	23.435								-0.084	6.7126
22.905	23.755								1.14035	-3.0203
23.115	24.425								7.4127
23.455	24.625								3.2588
24.965	25.255								5.9434
25.505	25.555								-5.6497
26.205	25.665								-3.4463
26.325	26.175								-5.3222
26.715	26.255								-4.9706
27.135	26.625
28.265	27.475
29.755	27.525
33.535	27.985
39.165	28.025
39.315	28.065
42.145	28.325
45.805	28.555
56.585	29.105
66.005	29.945
	29.975
	29.985
	31.705
	31.785
	31.835
	32.055
	32.165
	32.265
	32.345
	32.405
	32.655
	32.885
	33.265
	33.495
	33.585
	35.145
	38.955
	38.995
	42.865
	43.495
	45.485
	45.685
	47.305
	47.335
	55.975
	56.725
	59.335
	60.655
	69.355

## Sheet: Experiment2 quantif.1
pair: Spc42-mTUR Cnm67-EYFP									pair: Spc110-mTUR Cnm67-EYFP
condition: cycling cells									condition: cycling cells
P=0,063*10¯⁹									P=0,83
FL(bg)bb	FL(bg)ab	FL(D)bb	FL(D)ab	FRET (D) %	FL(DA)bb	FL(DA)ab	FRET(DA) %		FL(bg)bb	FL(bg)ab	FL(D)bb	FL(D)ab	FRET (D) %	FL(DA)bb	FL(DA)ab	FRET(DA) %
5273.64	5332.09	6042	6059	-5.70285	5923	6248	29.1017		5579.09	5487.91	6492	6251	-19.6331	6284	6196	0.449352
5273.64	5332.09	6910	6967	-0.088968	6382	6392	-4.57158		5579.09	5487.91	6484	6299	-11.5669	5967	5889	3.28649
5273.64	5332.09	6832	6898	0.481858	7191	7319	3.50018		5579.09	5487.91	6543	6493	4.09732	6081	5902	-21.2075
5273.64	5332.09	6331	6381	-0.806032	6473	6588	4.50235		5579.09	5487.91	6774	6659	-2.03385	5988	5869	-7.29962
5273.64	5332.09	7766	8062	8.70159	6153	6329	11.791		5579.09	5487.91	6277	6144	-6.37384	5927	5815	-6.36465
5273.64	5332.09	7197	7068	-10.7986	6837	7475	27.0448		5579.09	5487.91	6785	6600	-8.4362	5735	5646	1.3801
5273.64	5332.09	6654	6667	-3.40507	6680	7021	16.7295		5579.09	5487.91	6315	6137	-13.3754	5930	5800	-12.4381
5273.64	5332.09	6113	6243	7.85429	6919	6846	-8.68312		5579.09	5487.91	6655	6532	-3.04745	5611	5516	-13.5922
5273.64	5332.09	5632	5654	-11.3245	5932	6083	12.3245		5579.09	5487.91	6467	6329	-5.56636	6702	6588	-2.07421
5273.64	5332.09	6120	6202	2.70666	6910	7330	18.0962		5579.09	5487.91	5959	5880	3.10689	5966	5862	-3.42649
5273.64	5332.09	6398	6619	12.6307	6532	6739	10.5583		5579.09	5487.91	5765	5669	-2.66064	6531	6485	4.53136
5273.64	5332.09	6960	6949	-4.29551	6135	6179	-1.70674		5579.09	5487.91	6318	6280	6.71411	6154	6038	-4.51165
5273.64	5332.09	5958	6109	11.912	7760	8065	9.02136		5579.09	5487.91	6343	6145	-16.2562	6495	6389	-1.64447
5273.64	5332.09	6684	6798	3.78915	6310	6449	7.21146		5579.09	5487.91	6581	6449	-4.24707	5927	5810	-8.01581
5273.64	5332.09	5900	5861	-18.4256	6685	6893	9.58066		5579.09	5487.91	6068	5975	-0.373274	5949	5846	-3.30033
5273.64	5332.09	6833	6955	3.91553	6443	6730	16.3491		5579.09	5487.91	6515	6327	-11.5385	5892	5770	-10.9249
5273.64	5332.09	6073	6098	-4.36795	9844	10205	6.20872		5579.09	5487.91	6311	6268	6.17644	6597	6508	0.213885
5273.64	5332.09	5869	5907	-3.55787	6246	6791	33.35		5579.09	5487.91	6392	6335	4.0352	6500	6319	-10.8073
5273.64	5332.09	5923	6003	3.21138	5950	6152	17.5075		5579.09	5487.91	5802	5703	-3.63483	6628	6439	-10.2848
5273.64	5332.09	6033	6134	5.30552	6866	7050	7.30804		5579.09	5487.91	6057	5962	-0.805369	5794	5690	-6.34278
5273.64	5332.09	6507	6477	-7.7259	6251	6718	29.4785		5579.09	5487.91	5883	5781	-3.69107	6358	6297	3.73034
5273.64	5332.09	5775	5885	9.32259	6800	6775	-5.78377		5579.09	5487.91	6129	5969	-14.3046	6428	6430	9.89096
5273.64	5332.09	6053	6042	-9.78358	6642	7259	28.9866		5579.09	5487.91	5921	5792	-12.4365	5846	5725	-12.5767
5273.64	5332.09	7475	7397	-6.60826	6202	6455	17.3251		5579.09	5487.91	6387	6234	-8.28561	6294	6095	-17.7598
5273.64	5332.09	6156	6272	6.12245	5380	5527	45.4291		5579.09	5487.91	6476	6431	4.89686	6095	5944	-13.1154
5273.64	5332.09	6464	6553	2.50186	5810	5896	4.88473		5579.09	5487.91	6772	6480	-20.2419	6237	6015	-24.8189
5273.64	5332.09	5993	6012	-5.80291	6030	6312	22.8129		5579.09	5487.91	6548	6459	0.224677	6604	6431	-8.67553
5273.64	5332.09	5930	5911	-13.3794	5937	6365	35.7772		5579.09	5487.91	5997	5824	-24.3441	5704	5713	44.5073
5273.64	5332.09	6093	5951	-32.3884	6296	6639	21.7724		5579.09	5487.91	6145	5991	-12.4864	6066	5901	-17.8697
5273.64	5332.09	5977	5972	-9.91618	6343	6536	11.1757		5579.09	5487.91	5939	5802	-14.5876	6082	5926	-14.7956
5273.64	5332.09	6645	6495	-17.9253	6329	6402	1.3595		5579.09	5487.91	5922	5786	-15.0351	6522	6418	-1.37816
5273.64	5332.09	5669	5724	-0.881466	6569	7087	26.1863		5579.09	5487.91	5783	5680	-6.15239	6475	6370	-1.56653
5273.64	5332.09	5500	5561	1.11199	6127	6389	19.2586		5579.09	5487.91				6616	6466	-6.01357
5273.64	5332.09	5758	5749	-16.1797	5927	6131	18.218		5579.09	5487.91				6308	6068	-25.6543
5273.64	5332.09				5977	6325	29.1613		5579.09	5487.91				6569	6343	-15.7665
5273.64	5332.09				5780	5988	22.7997		5579.09	5487.91				6234	6048	-16.9291
5273.64	5332.09				6527	6690	7.699		5579.09	5487.91				5848	5764	2.60125
5273.64	5332.09				6084	6388	23.2544		5579.09	5487.91				5821	5704	-11.9478
5273.64	5332.09				7241	7558	11.6153		5579.09	5487.91				5978	5849	-10.4733
5273.64	5332.09				6197	6424	15.4359		5579.09	5487.91				5944	5812	-12.5947
5273.64	5332.09				6177	6464	20.1911		5579.09	5487.91				5705	5607	-5.72519
5273.64	5332.09				5336	5402	10.7932		5579.09	5487.91				6470	6281	-12.3338
5273.64	5332.09				5857	6002	12.919		5579.09	5487.91				6534	6345	-11.4128
5273.64	5332.09				5501	5563	1.53543		5579.09	5487.91				6581	6369	-13.7123
5273.64	5332.09				5487	5652	33.3049		5579.09	5487.91				6356	6270	0.66256
5273.64	5332.09				6590	6870	14.4056		5579.09	5487.91				6076	6010	4.82326
5273.64	5332.09				5743	5957	24.8909		5579.09	5487.91				5738	5657	6.02151
									5579.09	5487.91				6425	6280	-6.79445
									5579.09	5487.91				5713	5600	-19.4647
									5579.09	5487.91				6016	5903	-5.25624
									5579.09	5487.91				5712	5605	-13.5093
									5579.09	5487.91				6041	5940	-2.17173
									5579.09	5487.91				6065	5997	4.55357
									5579.09	5487.91				6491	6343	-6.64469
									5579.09	5487.91				5801	5711	0.529747
									5579.09	5487.91				6056	5960	-1.0206

## Sheet: Experiment2 quantif.2
pair: Spc42-mTUR Cnm67-EYFP									pair: Spc110-mTUR Cnm67-EYFP
condition: cycling cells									condition: cycling cells
P=0,017*10¯⁷									P=0,12
FL(bg)bb	FL(bg)ab	FL(D)bb	FL(D)ab	FRET (D) %	FL(DA)bb	FL(DA)ab	FRET(DA) %		FL(bg)bb	FL(bg)ab	FL(D)bb	FL(D)ab	FRET (D) %	FL(DA)bb	FL(DA)ab	FRET(DA) %
5995.78	6064.11	6599.08	6648.91	-3.16347	6995	7115	4.91647		5447.33	5098.67	6216	5900	4.07654	6573	6084	-14.2422
5995.78	6064.11	7707.08	7734.91	-2.42399	7047	7456	24.4751		5447.33	5098.67	5720	5389	6.08496	6336	5976	-1.29179
5995.78	6064.11	7470.08	7405.91	-9.8748	6558	6957	37.0333		5447.33	5098.67	5843	5409	-27.4973	5786	5375	-22.5573
5995.78	6064.11	7962.08	7783.91	-14.3331	6083	6185	27.8493		5447.33	5098.67	5814	5446	-5.56622	5619	5285	7.8712
5995.78	6064.11	7356.08	7344.91	-6.20706	6139	6280	33.6593		5447.33	5098.67	5970	5643	3.9804	6142	5761	-4.88173
5995.78	6064.11	7924.08	8181.91	8.94796	6218	6408	35.3796		5447.33	5098.67	7067	6576	-9.63448	5616	5290	11.8467
5995.78	6064.11	7533.08	7785.91	10.7155	7411	7516	2.52545		5447.33	5098.67	6437	6051	-3.9202	6485	6168	2.96135
5995.78	6064.11	6813.08	6721.91	-24.2475	6677	6738	-1.08821		5447.33	5098.67	5740	5391	-0.114025	5598	5232	-13
5995.78	6064.11	6567.08	6576.91	-11.408	6699	6724	-6.56676		5447.33	5098.67	6408	5988	-8.02099	5679	5352	8.55263
5995.78	6064.11	8315.08	8529.91	5.94128	6442	6559	9.83386		5447.33	5098.67	5567	5214	-3.75723	5946	5633	6.67498
5995.78	6064.11	7378.08	7270.91	-14.5426	6539	6742	19.8656		5447.33	5098.67	5751	5395	-2.47469	6019	5709	6.33534
5995.78	6064.11	6679.08	6718.91	-4.35247	6457	6644	20.4637		5447.33	5098.67	6527	6198	1.78896	6793	6558	7.78894
5995.78	6064.11	6759.08	6763.91	-9.07402	6634	6960	28.761		5447.33	5098.67	6434	6078	-0.748809	6505	6053	-10.8278
5995.78	6064.11	7813.08	7431.91	-32.863	6690	6785	3.69914		5447.33	5098.67	6101	5580	-35.8033	6408	6168	10.1621
5995.78	6064.11	6526.08	6587.91	-1.24093	6801	7129	24.3844		5447.33	5098.67	5545	5181	-18.6235	5979	5574	-11.8513
5995.78	6064.11	7491.08	7371.91	-14.3371	6203	6294	9.85984		5447.33	5098.67	5817	5476	2.0318	5467	5115	-20.4082
5995.78	6064.11	6833.08	6909.91	1.00497	6602	6834	21.2585		5447.33	5098.67	6367	6067	5.02582	6148	5881	10.4389
5995.78	6064.11	7473.08	7436.91	-7.61218	7050	7145	2.46711		5447.33	5098.67	6379	6007	-2.56881	6263	6002	9.7048
5995.78	6064.11	7788.08	7827.91	-1.61583	6558	6956	36.9628		5447.33	5098.67	6464	6157	3.93701	5691	5360	6.7602
5995.78	6064.11	6855.08	6869.91	-6.63936	6282	6557	41.9297		5447.33	5098.67	6381	6028	-0.466284	6559	6279	5.81757
5995.78	6064.11	6692.08	6665.91	-15.7029	6940	7490	33.7801		5447.33	5098.67	5634	5282	-1.81818	6945	6620	1.55565
5995.78	6064.11	7760.08	7912.91	4.57053	6570	6767	18.3054		5447.33	5098.67	6054	5639	-12.2764	5744	5344	-20.9239
5995.78	6064.11	7968.08	8019.91	-0.843645	7121	7314	9.97422		5447.33	5098.67	5642	5299	2.82862	5711	5358	-1.67095
5995.78	6064.11	6283.08	6301.91	-20.8158	6992	7074	1.35328		5447.33	5098.67	5868	5479	-10.6047	5614	5246	-13.1222
5995.78	6064.11	6555.08	6663.91	6.75225	6900	7090	11.8596		5447.33	5098.67	6279	5936	0.676752	5635	5254	-20.8155
5995.78	6064.11	6603.08	6668.91	-0.41336	6479	6595	8.97865		5447.33	5098.67	6457	6104	-0.431034	5832	5465	-5.00455
5995.78	6064.11	6659.08	6775.91	6.81371	6588	6808	20.3883		5447.33	5098.67	6109	5708	-8.58862	5630	5241	-28.3372
5995.78	6064.11	6702.08	6641.91	-22.2395	6914	6884	-11.9935		5447.33	5098.67	6130	5908	15.6507	5745	5368	-10.5198
5995.78	6064.11	7566.08	7689.91	3.4137	6371	6390	-15.1381		5447.33	5098.67	5818	5505	8.77769	6049	5650	-9.12938
5995.78	6064.11	7949.08	7934.91	-4.40988	6222	6394	31.4247		5447.33	5098.67	6272	5876	-6.08919	5981	5581	-10.6427
5995.78	6064.11	7457.08	7558.91	2.2411	6587	6856	25.3403		5447.33	5098.67	5659	5329	8.1042	5869	5504	-4.02961
5995.78	6064.11	8412.08	8360.91	-5.20289	7305	7496	8.56677		5447.33	5098.67	6481	6081	-5.22565	5625	5287	5.66372
5995.78	6064.11	6908.08	6942.91	-3.81202	6154	6248	13.9577		5447.33	5098.67	6841	6658	10.6242	6261	5886	-3.34462
5995.78	6064.11	7346.08	7485.91	5.02884	6841	6958	5.44438		5447.33	5098.67	6457	6129	2.00582	5938	5524	-15.3605
5995.78	6064.11	8909.08	9083.91	3.52672	6257	6429	28.4105		5447.33	5098.67	5701	5342	-4.24658	5587	5217	-18.0282
5995.78	6064.11	6647.08	6820.91	13.9403	6809	7104	21.7972		5447.33	5098.67	6162	5844	4.11449	5704	5351	-1.71731
5995.78	6064.11	6780.08	6884.91	4.44688	7071	7118	-2.02425		5447.33	5098.67	6251	5935	3.90594
5995.78	6064.11				7042	7189	6.99328		5447.33	5098.67	6295	5991	5.0056
5995.78	6064.11				6707	6850	9.50092		5447.33	5098.67	6357	6134	12.1378
5995.78	6064.11				6353	6585	31.4206		5447.33	5098.67	6221	5949	9.01607
5995.78	6064.11				6121	6228	23.5932		5447.33	5098.67	6319	6034	6.80684
5995.78	6064.11				6246	6483	40.2653		5447.33	5098.67	6133	5840	7.50899
5995.78	6064.11				6064	6133	0.967742		5447.33	5098.67	6322	6025	5.57755
5995.78	6064.11				6111	6704	81.9934		5447.33	5098.67	6104	5823	9.34192
5995.78	6064.11				6300	6578	40.8		5447.33	5098.67	6058	5754	6.81587
5995.78	6064.11				6887	7001	4.87429		5447.33	5098.67	5889	5494	-11.7201
5995.78	6064.11				6770	7075	23.4117		5447.33	5098.67	6785	6266	-14.5917
5995.78	6064.11				6615	6753	10.1129		5447.33	5098.67	6317	5933	-4.23492
5995.78	6064.11				6356	6570	28.7942		5447.33	5098.67	6150	5906	12.9645
5995.78	6064.11				6567	6576	-11.5911
5995.78	6064.11				6863	7061	13.0071
