# Supplementary material for: A FRET-based study reveals site-specific regulation of spindle position checkpoint proteins at yeast centrosomes
Source: eLife. 2016 May 9;5:e14029. doi: 10.7554/eLife.14029 (PMC4878874; doi:10.7554/eLife.14029)
Supplement: Figure 1—figure supplement 2—source data 2. — DOI: http://dx.doi.org/10.7554/eLife.14029.008 [file elife-14029-fig1-figsupp2-data2.xls]

## Sheet: Description
Description:
List of Abbreviations
Raw Mean Fluoresence Intensity before bleach (Donor/Aceptor): FL (DA) bb
Raw Mean Fluoresence Intensity before bleach (Donor only): FL (D) bb
Raw Mean Fluoresence Intensity before bleach (Background): FL (bg) bb
Raw Mean Fluoresence Intensity after bleach (Donor/Aceptor): FL (DA) ab
Raw Mean Fluoresence Intensity after bleach (Donor only): FL (D) ab
RawMean Fluoresence Intensity after bleach (Background): FL (bg) ab
Calculated FRET efficiency % for the indicated Donor/Acceptor pai) : FRET % (DA)
Calculated FRET efficiency % background for Donor only sample : FRET % (D)

## Sheet: Experiment1 
FRET-tandem Bfa1-EYFP-mTUR Bfa1-mTUR
condition: cycling cells Olympus Excellance ScanR software for segmentation analysis
P=0,001*10¯¹²
FRET (D) %	FRET(DA) %
-4.7829	13.602
6.9774	13.577
4.8783	39.023
-15.177	7.8838
2.1101	25.999
1.7357	13.541
3.1769	33.558
-3.0342	22.883
0.7137	39.471
-2.8579	1.267
-12.336	25.793
1.9742	5.3943
-17.549	21.12
8.3953	21.12
-7.0488	-3.0107
0.40958	22.285
-3.234	28.48
7.0773	30.584
-8.4	13.764
-17.693	14.766
4.7766	32.834
-4.1621	4.7496
-16.871	5.5517
1.5764	30.908
0.68366	16.953
5.045	22.216
-7.7248	40.139
1.016	9.1368
2.4869	15.21
-12.076	25.074
5.4865	38.038
-5.2527	18.222
-17.333	46.518
-10.349	38.97
	31.082
	46.913
	47.333
	11.917
	29.808
	50.339
	13.364
	22.7
	59.696
	27.682
	40.89
	22.84
	66.146
	44.607
	23.253
	56.686
	35.832
	89.981
	15.011
	24.427
	24.695

## Sheet: Quantif. #2
FRET-tandem Bfa1-EYFP-mTUR Bfa1-mTUR
condition: cycling cells
P=0,032*10¯¹³
FL(bg)bb	FL(bg)ab	FL(DA)bb	FL(DA)ab	FRET(DA) %		FL(bg)bb	FL(bg)ab	FL(D)bb	FL(D)ab	FRET (D) %
4722.25	4758.33	5591	5792	15.9545		5381.44	5434.22	6408	6371	-9.58368
4722.25	4758.33	5386	5482	8.27959		5381.44	5434.22	5926	5923	-11.4117
4722.25	4758.33	5453	5515	3.42511		5381.44	5434.22	6246	6304	0.600409
4722.25	4758.33	5500	5768	22.9696		5381.44	5434.22	6192	6185	-7.96211
4722.25	4758.33	5762	5949	12.675		5381.44	5434.22	6324	6228	-18.743
4722.25	4758.33	5774	5908	8.51696		5381.44	5434.22	5588	5592	-30.9155
4722.25	4758.33	4900	4971	16.4185		5381.44	5434.22	6424	6464	-1.24083
4722.25	4758.33	5177	5218	1.06962		5381.44	5434.22	6312	6185	-23.9455
4722.25	4758.33	4945	5061	26.4042		5381.44	5434.22	5723	5744	-10.2582
4722.25	4758.33	5299	5562	28.2352		5381.44	5434.22	5789	5776	-19.2458
4722.25	4758.33	5677	5637	-8.65895		5381.44	5434.22	6703	6719	-2.86258
4722.25	4758.33	5399	5568	16.4162		5381.44	5434.22	6331	6308	-8.67243
4722.25	4758.33	4946	4985	1.28676		5381.44	5434.22	6280	6160	-23.8059
4722.25	4758.33	5595	5752	12.1687		5381.44	5434.22	5765	5767	-15.2588
4722.25	4758.33	4850	4913	17.403		5381.44	5434.22	5598	5622	-15.3254
4722.25	4758.33	5243	5495	29.31		5381.44	5434.22	6317	6309	-6.9478
4722.25	4758.33	4760	4869	65.8886		5381.44	5434.22	6261	6277	-4.36388
4722.25	4758.33	5350	5489	14.0853		5381.44	5434.22	5501	5541	-11.9667
4722.25	4758.33	5636	5674	0.209319		5381.44	5434.22	5762	5753	-19.3796
4722.25	4758.33	5249	5415	19.7843		5381.44	5434.22	5730	5704	-29.201
4722.25	4758.33	6106	6299	10.185		5381.44	5434.22	6364	6395	-2.26668
4722.25	4758.33	5200	5246	2.03349		5381.44	5434.22	6671	6505	-20.4317
4722.25	4758.33	5302	5365	4.43681		5381.44	5434.22	5609	5672	4.29907
4722.25	4758.33	4943	5127	40.1221		5381.44	5434.22	6247	6222	-9.87306
4722.25	4758.33	5294	5402	11.173		5381.44	5434.22	5810	5856	-1.60695
4722.25	4758.33	5316	5435	12.2537		5381.44	5434.22	5964	5951	-12.7284
4722.25	4758.33	5442	5571	11.4336		5381.44	5434.22	6332	6178	-27.801
4722.25	4758.33	4918	4954	-0.0425894		5381.44	5434.22	6222	6262	-1.54362
4722.25	4758.33	5689	5855	11.8465		5381.44	5434.22	6072	6006	-20.7734
4722.25	4758.33	5260	5450	22.253		5381.44	5434.22	5934	5924	-12.8176
4722.25	4758.33	5073	5215	23.1934		5381.44	5434.22	6334	6289	-11.439
4722.25	4758.33	5534	5673	11.2518		5381.44	5434.22	6701	6628	-10.5361
4722.25	4758.33	5571	5813	19.5243		5381.44	5434.22	5922	5917	-11.9678
4722.25	4758.33	5735	6094	24.1764		5381.44	5434.22	6244	6101	-29.3618
4722.25	4758.33	5095	5215	18.3759		5381.44	5434.22	5913	5862	-24.2597
4722.25	4758.33	5793	6141	22.5591		5381.44	5434.22	6237	6463	16.8377
4722.25	4758.33	5380	5445	4.21117		5381.44	5434.22	6863	6869	-3.26028
4722.25	4758.33	5519	5758	20.2984		5381.44	5434.22	5912	6095	19.7074
4722.25	4758.33	4904	5099	46.6487		5381.44	5434.22	6296	6256	-11.2899
4722.25	4758.33	5088	5270	28.5179		5381.44	5434.22	5535	5617	15.9878
4722.25	4758.33	5430	5616	17.4796
4722.25	4758.33	5556	5716	12.9394
4722.25	4758.33	5437	5502	3.88839
4722.25	4758.33	5390	5486	8.23408
4722.25	4758.33	5644	6309	40.5578

## Sheet: Quantif. #3
FRET-tandem Bfa1-EYFP-mTUR Bfa1-mTUR
condition: cycling cells
P=0,011*10¯⁷
FL(bg)bb	FL(bg)ab	FL(DA)bb	FL(DA)ab	FRET(DA) %		FL(bg)bb	FL(bg)ab	FL(D)bb	FL(D)ab	FRET (D) %
4722.25	4758.33	4771.55	4836.13	36.6324		5381.44	5434.22	6759.74	6846.02	2.37286
4722.25	4758.33	4849.55	4892.13	4.858		5381.44	5434.22	7030.74	6738.02	-26.4995
4722.25	4758.33	4977.55	5034.13	7.43292		5381.44	5434.22	6399.74	6274.02	-21.2551
4722.25	4758.33	4862.55	5110.13	60.1194		5381.44	5434.22	7223.74	7249.02	-1.51532
4722.25	4758.33	5073.55	5201.13	20.664		5381.44	5434.22	6363.74	6436.02	1.9465
4722.25	4758.33	5655.55	5721.13	3.06398		5381.44	5434.22	6291.74	6227.02	-14.8209
4722.25	4758.33	5165.55	5261.13	11.8337		5381.44	5434.22	6734.74	6706.02	-6.40824
4722.25	4758.33	5737.55	5739.13	-3.51754		5381.44	5434.22	6112.74	6146.02	-2.73953
4722.25	4758.33	5072.55	5135.13	7.03291		5381.44	5434.22	5828.74	5916.02	7.16065
4722.25	4758.33	5498.55	5580.13	5.53663		5381.44	5434.22	6308.74	6324.02	-4.21443
4722.25	4758.33	5625.55	5687.13	2.74548		5381.44	5434.22	7319.74	7361.02	-0.596845
4722.25	4758.33	5042.55	5104.13	7.3742		5381.44	5434.22	6475.74	6504.02	-2.29015
4722.25	4758.33	4898.55	4949.13	7.59958		5381.44	5434.22	6412.74	6372.02	-9.97014
4722.25	4758.33	5385.55	5417.13	-0.68306		5381.44	5434.22	6043.74	6053.02	-7.02973
4722.25	4758.33	5365.55	5684.13	30.5141		5381.44	5434.22	6575.74	6536.02	-8.39535
4722.25	4758.33	5388.55	5565.13	17.4145		5381.44	5434.22	6165.74	6137.02	-11.5965
4722.25	4758.33	5318.55	5613.13	30.241		5381.44	5434.22	6821.74	6698.02	-13.9658
4722.25	4758.33	5222.55	5427.13	25.1944		5381.44	5434.22	5921.74	6008.02	5.83827
4722.25	4758.33	5896.55	6102.13	12.6135		5381.44	5434.22	7389.74	7382.02	-3.10607
4722.25	4758.33	5523.55	5635.13	8.61086		5381.44	5434.22	6999.74	7018.02	-2.17831
4722.25	4758.33	5664.55	5752.13	5.18213		5381.44	5434.22	6170.74	6170.02	-7.271
4722.25	4758.33	5136.55	5155.13	-4.41028		5381.44	5434.22	5883.74	5875.02	-13.9519
4722.25	4758.33	5605.55	5640.13	-0.170107		5381.44	5434.22	6393.74	6207.02	-30.9912
4722.25	4758.33	5652.55	5827.13	12.9585		5381.44	5434.22	6325.74	6384.02	0.579069
4722.25	4758.33	4855.55	4990.13	42.4935		5381.44	5434.22	6491.74	6284.02	-30.6543
4722.25	4758.33	5545.55	5635.13	6.10173		5381.44	5434.22	6078.74	6153.02	2.9911
4722.25	4758.33	4868.55	4942.13	20.4026		5381.44	5434.22	7160.74	7223.02	0.531082
4722.25	4758.33	5695.55	5743.13	1.16775		5381.44	5434.22	6730.74	6732.02	-3.96825
4722.25	4758.33	4831.55	4894.13	19.514		5381.44	5434.22	5838.74	5914.02	4.68945
4722.25	4758.33	5057.55	5126.13	8.83632		5381.44	5434.22	5892.74	5994.02	8.66381
4722.25	4758.33	4987.55	5161.13	34.136		5381.44	5434.22	6186.74	6238.02	-0.186614
4722.25	4758.33	4834.55	4896.13	18.5051
4722.25	4758.33	5406.55	5618.13	20.4117
4722.25	4758.33	5594.55	5657.13	2.94838
4722.25	4758.33	5695.55	5917.13	16.0079
4722.25	4758.33	5137.55	5226.13	11.2227
4722.25	4758.33	5636.55	5725.13	5.43029
4722.25	4758.33	5124.55	5240.13	16.5006
4722.25	4758.33	5382.55	5489.13	9.64696
4722.25	4758.33	5637.55	5931.13	21.956
4722.25	4758.33	5213.55	5295.13	8.47615
4722.25	4758.33	5609.55	5630.13	-1.77793
4722.25	4758.33	5478.55	5808.13	27.9577
4722.25	4758.33	6099.55	6271.13	8.9569
4722.25	4758.33	5774.55	5821.13	0.987956
4722.25	4758.33	5419.55	5596.13	16.7701
4722.25	4758.33	5324.55	5372.13	1.87357	1.10866e-09
4722.25	4758.33	5594.55	5657.13	2.94838
