# Supplementary material for: A FRET-based study reveals site-specific regulation of spindle position checkpoint proteins at yeast centrosomes
Source: eLife. 2016 May 9;5:e14029. doi: 10.7554/eLife.14029 (PMC4878874; doi:10.7554/eLife.14029)
Supplement: Figure 1—source data 1. — DOI: http://dx.doi.org/10.7554/eLife.14029.004 [file elife-14029-fig1-data1.xls]

## Sheet: Description
Description:
List of Abbreviations
Raw Mean Fluoresence Intensity before bleach (Donor/Aceptor): FL (DA) bb
Raw Mean Fluoresence Intensity before bleach (Donor only): FL (D) bb
Raw Mean Fluoresence Intensity before bleach (Background): FL (bg) bb
Raw Mean Fluoresence Intensity after bleach (Donor/Aceptor): FL (DA) ab
Raw Mean Fluoresence Intensity after bleach (Donor only): FL (D) ab
RawMean Fluoresence Intensity after bleach (Background): FL (bg) ab
Calculated FRET efficiency % for the indicated Donor/Acceptor pair) : FRET % (DA)
Calculated FRET efficiency % background for Donor only sample : FRET % (D)
P-value for the indicated pair FRET % (DA) and FRET % (D) according to students t-test: P

## Sheet: Experiment1 
pair: Nud1-mTUR Bfa1-EYFP									pair: Spc72-mTUR Bfa1-EYFP									pair: Cnm67-mTUR Bfa1-EYFP
condition: cycling cells									condition: cycling cells									condition: cycling cells
P=0,002									P=0,004									P=0,384
FL(bg)bb	FL(bg)ab	FL(D)bb	FL(D)ab	FRET (D) %	FL(DA)bb	FL(DA)ab	FRET(DA) %		FL(bg)bb	FL(bg)ab	FL(D)bb	FL(D)ab	FRET (D) %	FL(DA)bb	FL(DA)ab	FRET(DA) %		FL(bg)bb	FL(bg)ab	FL(D)bb	FL(D)ab	FRET (D) %	FL(DA)bb	FL(DA)ab	FRET(DA) %
4.33239e+06	4.24813e+06	4.89837e+06	4.70102e+06	-19.969	5.98939e+06	5.72353e+06	-7.309		6.50252e+06	6.42868e+06	7071714	7060048	-4.1513	6745762	6991405	42.7753		4.27912e+06	4.1807e+06	4.28e+06	4.18159e+06	3.3472	4.28046e+06	4.18204e+06	1.9974
4.33239e+06	4.24813e+06	5.02729e+06	4.60527e+06	-89.571	5.93809e+06	5.66273e+06	-8.511		6.50252e+06	6.42868e+06	6698600	6541782	-87.3563	7337516	7184452	-24.4814		4.27912e+06	4.1807e+06	4.27979e+06	4.18125e+06	-20.121	4.27982e+06	4.18129e+06	-17.311
4.33239e+06	4.24813e+06	5.0367e+06	4.87867e+06	-6.7	5.04815e+06	5.22254e+06	31.544		6.50252e+06	6.42868e+06	6753978	6751228	8.04234	7043769	7206103	16.38		4.27912e+06	4.1807e+06	4.27951e+06	4.18117e+06	19.479	4.28001e+06	4.18151e+06	-8.195
4.33239e+06	4.24813e+06	4.93045e+06	4.8377e+06	3.56	5.02979e+06	5.02277e+06	14.9712		6.50252e+06	6.42868e+06	7888306	7856204	-11.0757	6967683	6891463	-14.5126		4.27912e+06	4.1807e+06	4.27931e+06	4.1808e+06	-78.557	4.28015e+06	4.18164e+06	-8.239
4.33239e+06	4.24813e+06	4.82618e+06	4.70132e+06	-3.9586	4.61937e+06	4.6211e+06	28.056		6.50252e+06	6.42868e+06	7247035	7292954	-0.142542	7291029	7430543	7.29644		4.27912e+06	4.1807e+06	4.28001e+06	4.18171e+06	13.716	4.27985e+06	4.18133e+06	-13.245
4.33239e+06	4.24813e+06	5.25263e+06	5.14251e+06	2.1081	5.03442e+06	5.16881e+06	28.748		6.50252e+06	6.42868e+06	6857726	6841081	-0.129421	6586417	6557312	20.7827		4.27912e+06	4.1807e+06	4.27981e+06	4.18133e+06	-7.7871	4.27999e+06	4.18148e+06	-9.949
4.33239e+06	4.24813e+06	5.11232e+06	5.06726e+06	9.7854	5.06692e+06	5.0239e+06	10.3162		6.50252e+06	6.42868e+06	7433078	7539812	2.25201	6535533	6524505	51.5545		4.27912e+06	4.1807e+06	4.28006e+06	4.18156e+06	-7.1203	4.2797e+06	4.18126e+06	-1.7883
4.33239e+06	4.24813e+06	5.32912e+06	5.20181e+06	0.4857	5.42909e+06	5.48643e+06	16.436		6.50252e+06	6.42868e+06	7151219	7034625	-21.0544	7318811	7336414	-3.9254		4.27912e+06	4.1807e+06	4.2801e+06	4.18165e+06	-0.1106	4.27973e+06	4.18135e+06	9.0367
4.33239e+06	4.24813e+06	4.83181e+06	4.7652e+06	8.4136	5.23975e+06	5.35453e+06	22.988		6.50252e+06	6.42868e+06	6990883	6815273	-40.3226	6911400	6896978	-1.31033		4.27912e+06	4.1807e+06	4.27958e+06	4.18124e+06	16.421	4.27991e+06	4.18146e+06	-1.1173
4.33239e+06	4.24813e+06	5.15257e+06	4.91463e+06	-18.057	6.06029e+06	5.89443e+06	0.0433		6.50252e+06	6.42868e+06	6590715	6515740	-15.2946	6786612	6881531	23.2674		4.27912e+06	4.1807e+06	4.28049e+06	4.18202e+06	-1.1806	4.27967e+06	4.18124e+06	-1.0005
4.33239e+06	4.24813e+06	4.35273e+06	4.30395e+06	68.562	6.61059e+06	6.38483e+06	-1.6204		6.50252e+06	6.42868e+06	7187000	7013233	-31.0931	7807373	7702353	-16.4474		4.27912e+06	4.1807e+06	4.27972e+06	4.18135e+06	9.0877	4.28006e+06	4.18164e+06	2.15081
4.33239e+06	4.24813e+06	5.2044e+06	5.08129e+06	0.3371	6.64759e+06	6.63473e+06	7.9917		6.50252e+06	6.42868e+06	6836095	6973413	24.7648	6908480	7015573	16.8301		4.27912e+06	4.1807e+06	4.27983e+06	4.18143e+06	4.8541	4.2803e+06	4.18173e+06	-12.867
4.33239e+06	4.24813e+06	4.88832e+06	4.81706e+06	7.2842	6.52699e+06	6.69333e+06	15.249		6.50252e+06	6.42868e+06	6798089	6986857	33.0486	6799587	6986130	32.7108		4.27912e+06	4.1807e+06	4.27971e+06	4.18121e+06	-13.788	4.28013e+06	4.18174e+06	4.8186
4.33239e+06	4.24813e+06	5.52719e+06	5.46113e+06	6.5015	6.87099e+06	6.78813e+06	5.05402		6.50252e+06	6.42868e+06	6831179	6745625	-17.6934	6601104	6726121	52.8578		4.27912e+06	4.1807e+06	4.27971e+06	4.18133e+06	7.6883	4.28001e+06	4.18158e+06	0.4511
4.33239e+06	4.24813e+06	4.85515e+06	4.7207e+06	-5.621	6.08299e+06	5.96903e+06	3.2719		6.50252e+06	6.42868e+06	6823629	6865679	12.5211	6599283	6614522	33.936		4.27912e+06	4.1807e+06	4.27964e+06	4.18125e+06	8.2462	4.27997e+06	4.18145e+06	-12.367
4.33239e+06	4.24813e+06	5.04888e+06	4.83151e+06	-17.818	5.76949e+06	5.76243e+06	10.0976		6.50252e+06	6.42868e+06	6956386	6788014	-40.3051	7289432	7497432	12.3716		4.27912e+06	4.1807e+06	4.27948e+06	4.18104e+06	-3.2051	4.28019e+06	4.18174e+06	-0.5052
4.33239e+06	4.24813e+06	4.80799e+06	4.64848e+06	-13.798	5.42829e+06	5.49193e+06	16.895		6.50252e+06	6.42868e+06	6951262	7209762	-7.58632	6614410	6896951	62.1068		4.27912e+06	4.1807e+06	4.2798e+06	4.18137e+06	-0.0049	4.27989e+06	4.18149e+06	4.3009
4.33239e+06	4.24813e+06	4.97293e+06	4.71215e+06	-33.042	5.42269e+06	5.18322e+06	-11.598		6.50252e+06	6.42868e+06	6970167	7156633	21.7595	6651264	6757076	40.7077		4.27912e+06	4.1807e+06	4.28e+06	4.18162e+06	6.9783	4.28059e+06	4.18214e+06	-0.0734
4.33239e+06	4.24813e+06	4.86763e+06	4.75629e+06	-0.3297	5.21775e+06	5.17125e+06	9.0899		6.50252e+06	6.42868e+06	7505048	7598738	0.318725	6564227	6480830	-32.3096		4.27912e+06	4.1807e+06	4.28052e+06	4.18193e+06	-11.843	4.27982e+06	4.1813e+06	-13.225
4.33239e+06	4.24813e+06	4.78163e+06	4.77724e+06	20.095	4.75268e+06	4.76479e+06	23.652		6.50252e+06	6.42868e+06	7217190	7429405	14.5855	6796080	7025680	36.8285		4.27912e+06	4.1807e+06	4.27983e+06	4.18132e+06	-11.701	4.27987e+06	4.18134e+06	-15.162
4.33239e+06	4.24813e+06	4.97316e+06	4.86992e+06	1.9459	5.18414e+06	5.11628e+06	6.8889		6.50252e+06	6.42868e+06	6790476	6988048	34.5223	7439494	7410403	-9.441		4.27912e+06	4.1807e+06	4.27934e+06	4.18098e+06	22.962	4.27982e+06	4.18147e+06	11.4802
4.33239e+06	4.24813e+06	5.74829e+06	5.50883e+06	-7.307	4.85886e+06	4.74801e+06	-0.3188		6.50252e+06	6.42868e+06	7174929	7318167	10.4056	7056271	7094860	2.87777		4.27912e+06	4.1807e+06	4.27983e+06	4.18139e+06	-1.5412	4.28003e+06	4.18151e+06	-10.321
4.33239e+06	4.24813e+06	4.50594e+06	4.44601e+06	17.293	4.59933e+06	4.50181e+06	-0.2271		6.50252e+06	6.42868e+06	6751810	5015119	-48.6291	6880442	7014732	21.515		4.27912e+06	4.1807e+06	4.28045e+06	4.18196e+06	-3.8501	4.27985e+06	4.18149e+06	9.6871
4.33239e+06	4.24813e+06	4.54092e+06	4.44755e+06	0.4324	5.36619e+06	5.52043e+06	23.747		6.50252e+06	6.42868e+06	7075548	7309357	20.934	7001437	7177345	19.36		4.27912e+06	4.1807e+06	4.28063e+06	4.18237e+06	11.6643	4.27978e+06	4.18133e+06	-2.6496
4.33239e+06	4.24813e+06	4.6607e+06	4.66551e+06	26.34	5.94019e+06	6.02013e+06	14.2666		6.50252e+06	6.42868e+06	6557405	6494786	2.98529	6973390	6986427	1.57773		4.27912e+06	4.1807e+06	4.28145e+06	4.1829e+06	-3.7382	4.28026e+06	4.18185e+06	3.16125
4.33239e+06	4.24813e+06	4.66536e+06	4.57548e+06	3.2811	6.27939e+06	6.36843e+06	13.1766		6.50252e+06	6.42868e+06	6844429	6792500	-7.9754	6791768	6963261	31.8938		4.27912e+06	4.1807e+06	4.28086e+06	4.18252e+06	6.4221	4.27976e+06	4.18145e+06	15.787
4.33239e+06	4.24813e+06	4.77066e+06	4.55977e+06	-35.637	6.23909e+06	6.46233e+06	18.887		6.50252e+06	6.42868e+06	6585946	6565411	24.9901	7616721	7705882	-1.23707		4.27912e+06	4.1807e+06	4.28127e+06	4.1828e+06	-0.1775	4.28065e+06	4.18214e+06	-3.9296
4.33239e+06	4.24813e+06	5.03888e+06	4.76907e+06	-30.619	5.87199e+06	5.91603e+06	12.6916		6.50252e+06	6.42868e+06	6551419	6765919	71.5016	8376328	8413508	-8.40618		4.27912e+06	4.1807e+06	4.281e+06	4.18257e+06	1.47726	4.2796e+06	4.18118e+06	2.62305
4.33239e+06	4.24813e+06	5.2944e+06	5.22026e+06	6.0409	6.05209e+06	6.19563e+06	16.695		6.50252e+06	6.42868e+06	7336643	7261107	-14.2028	7795753	8133290	10.1336		4.27912e+06	4.1807e+06	4.28126e+06	4.18268e+06	-6.1363	4.28037e+06	4.18188e+06	-3.6197
4.33239e+06	4.24813e+06	5.26599e+06	4.92093e+06	-33.763	5.95999e+06	5.92653e+06	8.0296		6.50252e+06	6.42868e+06	7055946	7142946	8.51922	7824431	8375262	18.091		4.27912e+06	4.1807e+06	4.28111e+06	4.18277e+06	6.0693	4.28098e+06	4.18261e+06	4.4277
4.33239e+06	4.24813e+06	4.91147e+06	4.88474e+06	14.0368	5.91509e+06	5.83123e+06	5.02514		6.50252e+06	6.42868e+06	7138250	7004821	-24.3413	7021362	7445447	34.972		4.27912e+06	4.1807e+06	4.28017e+06	4.18152e+06	-25.569	4.27986e+06	4.18144e+06	1.87525
4.33239e+06	4.24813e+06	5.48599e+06	5.37833e+06	2.9233	5.74309e+06	5.91993e+06	20.615		6.50252e+06	6.42868e+06	6984964	6894107	-17.6545	6748846	6732769	4.9978		4.27912e+06	4.1807e+06	4.28032e+06	4.18211e+06	17.264	4.2805e+06	4.18195e+06	-8.212
4.33239e+06	4.24813e+06	5.12064e+06	5.0154e+06	2.2661	5.79019e+06	5.89923e+06	16.707		6.50252e+06	6.42868e+06	6932929	7007839	11.685	7293836	7019030	-48.0403		4.27912e+06	4.1807e+06	4.27972e+06	4.18122e+06	-12.966	4.28028e+06	4.18182e+06	-1.3673
4.33239e+06	4.24813e+06	4.99829e+06	4.6592e+06	-56.992	5.15411e+06	5.03723e+06	0.8655		6.50252e+06	6.42868e+06	7032196	7263339	22.5406	6508070	6762579	84.3391		4.27912e+06	4.1807e+06	4.27952e+06	4.18112e+06	6.1286	4.28022e+06	4.18172e+06	-6.7292
4.33239e+06	4.24813e+06	5.37989e+06	5.08467e+06	-20.213	5.67089e+06	5.77833e+06	17.527		6.50252e+06	6.42868e+06	6946268	7039946	13.4062	6546702	6550860	49.8432		4.27912e+06	4.1807e+06	4.2798e+06	4.18142e+06	6.8298	4.28022e+06	4.18164e+06	-14.202
4.33239e+06	4.24813e+06	4.96893e+06	4.99789e+06	20.1	5.75159e+06	5.60983e+06	0.7804		6.50252e+06	6.42868e+06	7013500	6902750	-21.784	7091106	7172660	6.88781		4.27912e+06	4.1807e+06				4.28002e+06	4.1814e+06	-25.838
4.33239e+06	4.24813e+06	5.50889e+06	5.37933e+06	1.0007	4.68626e+06	4.56421e+06	-6.955		6.50252e+06	6.42868e+06	6576179	6605536	44.3542	6763351	6915649	32.4391		4.27912e+06	4.1807e+06				4.27987e+06	4.18131e+06	-21.25
4.33239e+06	4.24813e+06	5.12174e+06	4.86405e+06	-23.157	5.43519e+06	5.35843e+06	5.67755		6.50252e+06	6.42868e+06	7013500	6902750	-21.784	6702018	6684193	7.92535		4.27912e+06	4.1807e+06				4.28023e+06	4.18177e+06	-1.5365
4.33239e+06	4.24813e+06	4.93263e+06	4.71338e+06	-24.016	5.22694e+06	5.34263e+06	23.266		6.50252e+06	6.42868e+06				6586158	6647684	47.8124		4.27912e+06	4.1807e+06				4.27987e+06	4.18153e+06	12.0313
4.33239e+06	4.24813e+06	4.75684e+06	4.57692e+06	-24.095	4.95444e+06	4.97644e+06	19.59		6.50252e+06	6.42868e+06				6908480	7015573	16.8301		4.27912e+06	4.1807e+06				4.27966e+06	4.18116e+06	-14.225
4.33239e+06	4.24813e+06	4.96758e+06	4.97843e+06	18.023	5.23695e+06	5.34653e+06	22.65											4.27912e+06	4.1807e+06				4.27977e+06	4.18135e+06	1.61325
4.33239e+06	4.24813e+06	5.08284e+06	5.00508e+06	5.8581	6.20949e+06	6.23193e+06	10.3756											4.27912e+06	4.1807e+06				4.27987e+06	4.18143e+06	-0.1396
4.33239e+06	4.24813e+06	4.21196e+06	4.04406e+06	45.984														4.27912e+06	4.1807e+06				4.27978e+06	4.18133e+06	-3.4128
4.33239e+06	4.24813e+06	4.57063e+06	4.47562e+06	0.2743														4.27912e+06	4.1807e+06				4.27984e+06	4.18137e+06	-4.8791
4.33239e+06	4.24813e+06	4.65245e+06	4.77099e+06	43.786														4.27912e+06	4.1807e+06				4.2806e+06	4.18209e+06	-3.9664
4.33239e+06	4.24813e+06	5.50549e+06	5.2406e+06	-13.202														4.27912e+06	4.1807e+06				4.28014e+06	4.18168e+06	-2.5709
4.33239e+06	4.24813e+06	4.39936e+06	4.34213e+06	33.754														4.27912e+06	4.1807e+06				4.2805e+06	4.18198e+06	-6.1348
4.33239e+06	4.24813e+06	4.86035e+06	4.56774e+06	-60.188														4.27912e+06	4.1807e+06				4.27971e+06	4.18128e+06	0.2556
																		4.27912e+06	4.1807e+06				4.27994e+06	4.18139e+06	-17.5

## Sheet: Experiment2
pair: Nud1-mTUR Bfa1-EYFP									pair: Spc72-mTUR Bfa1-EYFP									pair: Сть67-mTUR Bfa1-EYFP
condition: cycling cells									condition: cycling cells									condition: cycling cells
P=0,008									P=0,011									P=0,347
FL(bg)bb	FL(bg)ab	FL(D)bb	FL(D)ab	FRET (D) %	FL(DA)bb	FL(DA)ab	FRET(DA) %		FL(bg)bb	FL(bg)ab	FL(D)bb	FL(D)ab	FRET (D) %	FL(DA)bb	FL(DA)ab	FRET(DA) %		FL(bg)bb	FL(bg)ab	FL(D)bb	FL(D)ab	FRET (D) %	FL(DA)bb	FL(DA)ab	FRET(DA) %
3.6365e+06	3.65081e+06	3684551	3687092	-32.4367	5224258	5329274	5.40405		6.06318e+06	6.16578e+06	6.18291e+06	6.32186e+06	-4.0113	7.23938e+06	7.17588e+06	-8.3058		8.8038e+06	8.88106e+06	8.80557e+06	8.88302e+06	9.3977	8.80423e+06	8.88143e+06	-16.499
3.6365e+06	3.65081e+06	4305565	4306848	-1.98582	5236314	5345216	5.58255		6.06318e+06	6.16578e+06	6.14986e+06	6.21563e+06	-87.2163	6.69943e+06	6.73072e+06	-4.4819		8.8038e+06	8.88106e+06	8.80411e+06	8.88143e+06	15.065	8.80499e+06	8.88221e+06	-3.2896
3.6365e+06	3.65081e+06	4548348	4628674	6.75094	5131627	5188000	2.7363		6.06318e+06	6.16578e+06	6.34267e+06	6.48945e+06	8.18234	6.88793e+06	6.79769e+06	-22.3768		8.8038e+06	8.88106e+06	8.80465e+06	8.88194e+06	3.482	8.80494e+06	8.88218e+06	-2.1089
3.6365e+06	3.65081e+06	3997109	4102304	20.1295	4439608	4655667	20.0772		6.06318e+06	6.16578e+06	6.30934e+06	6.58221e+06	-10.9357	6.27172e+06	6.33254e+06	-16.9171		8.8038e+06	8.88106e+06	8.80459e+06	8.88185e+06	0.23221	8.80428e+06	8.88163e+06	15.279
3.6365e+06	3.65081e+06	3868261	3853435	-14.3794	4851161	4820000	-3.88916		6.06318e+06	6.16578e+06	6.56749e+06	6.58823e+06	-0.00254183	7.13758e+06	7.11753e+06	-4.7461		8.8038e+06	8.88106e+06	8.80403e+06	8.88134e+06	19.747	8.80481e+06	8.88189e+06	-21.467
3.6365e+06	3.65081e+06	4200500	4232130	2.97928	4085694	4226339	21.9508		6.06318e+06	6.16578e+06	6.55998e+06	6.49356e+06	0.0105793	6.40048e+06	6.57867e+06	26.449		8.8038e+06	8.88106e+06	8.80461e+06	8.88191e+06	4.4313	8.80428e+06	8.88143e+06	-30.915
3.6365e+06	3.65081e+06	3782022	3824804	16.363	4348564	4395145	4.33542		6.06318e+06	6.16578e+06	6.56403e+06	6.58416e+06	2.39201	6.22106e+06	6.37351e+06	32.14		8.8038e+06	8.88106e+06	8.80456e+06	8.88169e+06	-22.247	8.80409e+06	8.88139e+06	12.221
3.6365e+06	3.65081e+06	3998478	4003435	-2.65259	4182645	4323839	18.8525		6.06318e+06	6.16578e+06	6.67266e+06	6.63317e+06	-20.9144	6.77217e+06	6.96626e+06	19.569		8.8038e+06	8.88106e+06	8.80481e+06	8.88207e+06	-0.23701	8.8051e+06	8.88234e+06	-1.2696
3.6365e+06	3.65081e+06	4789045	4704418	-9.39035	8219156	8465906	4.8273		6.06318e+06	6.16578e+06	6.28864e+06	6.26744e+06	-40.1826	6.44935e+06	6.61694e+06	22.544		8.8038e+06	8.88106e+06	8.80454e+06	8.88164e+06	-27.646	8.80447e+06	8.8817e+06	-5.3011
3.6365e+06	3.65081e+06	3946478	3903627	-22.6096	7254122	7417463	3.95657		6.06318e+06	6.16578e+06	7.06185e+06	7.10125e+06	-15.1546	6.65766e+06	6.68e+06	-7.4685		8.8038e+06	8.88106e+06	8.80458e+06	8.88174e+06	-15.326	8.80443e+06	8.88189e+06	24.647
3.6365e+06	3.65081e+06	4311343	4170716	-29.8009	7136585	7314037	4.45348		6.06318e+06	6.16578e+06	6.15736e+06	6.2316e+06	-30.9531	6.22753e+06	6.3256e+06	5.307		8.8038e+06	8.88106e+06	8.80482e+06	8.88192e+06	-18.468	8.80544e+06	8.88289e+06	9.968
3.6365e+06	3.65081e+06	4752030	4712672	-5.0542	6653000	6869646	6.28597		6.06318e+06	6.16578e+06	6.40807e+06	6.50356e+06	24.9048	7.04841e+06	7.17688e+06	10.702		8.8038e+06	8.88106e+06	8.80484e+06	8.88206e+06	-4.058	8.80473e+06	8.88187e+06	-14.35
3.6365e+06	3.65081e+06	3972761	4079848	21.6241	3824247	3881479	18.607		6.06318e+06	6.16578e+06	6.55791e+06	6.47839e+06	33.1886	6.52681e+06	6.59666e+06	0.539		8.8038e+06	8.88106e+06	8.80412e+06	8.88142e+06	11.668	8.80467e+06	8.8818e+06	-18.095
3.6365e+06	3.65081e+06	4458174	4418609	-7.01688	3966397	3989260	2.52686		6.06318e+06	6.16578e+06	6.34177e+06	6.34693e+06	-17.5534	6.13048e+06	6.26712e+06	41.727		8.8038e+06	8.88106e+06	8.80438e+06	8.88165e+06	2.4245	8.80489e+06	8.88216e+06	1.5828
3.6365e+06	3.65081e+06	4047891	4081891	4.56737	4036794	4123973	15.4001		6.06318e+06	6.16578e+06	6.73154e+06	6.95568e+06	12.6611	6.47969e+06	6.48328e+06	-23.043		8.8038e+06	8.88106e+06	8.80434e+06	8.88151e+06	-20.84	8.80435e+06	8.88155e+06	-12.569
3.6365e+06	3.65081e+06	4013446	4062215	8.37568	3979260	3965000	-9.09337		6.06318e+06	6.16578e+06	6.33885e+06	6.30431e+06	-40.1651	6.26849e+06	6.38423e+06	14.152		8.8038e+06	8.88106e+06	8.80403e+06	8.88126e+06	-16.762	8.80432e+06	8.88177e+06	26.753
3.6365e+06	3.65081e+06	3882600	3982523	25.8089	4134904	4193288	8.12438		6.06318e+06	6.16578e+06	6.37296e+06	6.60828e+06	-7.44632	6.30471e+06	6.43342e+06	17.894		8.8038e+06	8.88106e+06	8.80451e+06	8.88182e+06	5.8288	8.80424e+06	8.88157e+06	12.772
3.6365e+06	3.65081e+06	4065277	4218646	24.489	3950623	3975246	3.17848		6.06318e+06	6.16578e+06	6.57641e+06	6.57865e+06	21.8995	7.09808e+06	7.32578e+06	18.929		8.8038e+06	8.88106e+06	8.80482e+06	8.88198e+06	-11.593	8.80504e+06	8.88252e+06	15.11
3.6365e+06	3.65081e+06	4116092	4118877	-2.4624	3685933	3775489	60.3495		6.06318e+06	6.16578e+06	6.30593e+06	6.30717e+06	0.458725	6.94706e+06	7.00867e+06	3.276		8.8038e+06	8.88106e+06	8.80465e+06	8.88186e+06	-7.3732	8.8047e+06	8.88216e+06	17.224
3.6365e+06	3.65081e+06	4012492	3841923	-96.7367	4395962	4310725	-15.0849		6.06318e+06	6.16578e+06	6.86571e+06	7.18388e+06	14.7255	6.45344e+06	6.6421e+06	26.209		8.8038e+06	8.88106e+06	8.80495e+06	8.88198e+06	-25.41	8.80477e+06	8.88231e+06	21.718
3.6365e+06	3.65081e+06	4244077	4231077	-4.70656	4257150	4232075	-6.77583		6.06318e+06	6.16578e+06	6.67085e+06	6.82759e+06	34.6623	7.00952e+06	7.1027e+06	7.134		8.8038e+06	8.88106e+06	8.80453e+06	8.88166e+06	-21.339	8.80527e+06	8.88278e+06	14.395
3.6365e+06	3.65081e+06	4171461	4127354	-12.2585	3830175	3862625	8.56358		6.06318e+06	6.16578e+06	6.53743e+06	6.51468e+06	10.5456	6.63188e+06	6.71012e+06	3.665		8.8038e+06	8.88106e+06	8.80415e+06	8.88142e+06	3.1014	8.80559e+06	8.88301e+06	7.9206
3.6365e+06	3.65081e+06	4503938	4550704	3.60655	3837962	3837887	-7.68962		6.06318e+06	6.16578e+06				7.11268e+06	7.25248e+06	11.559		8.8038e+06	8.88106e+06	8.80402e+06	8.88136e+06	26.116	8.80417e+06	8.88144e+06	1.7778
3.6365e+06	3.65081e+06	4284309	4388457	12.1788	4518598	4435805	-12.3699		6.06318e+06	6.16578e+06				6.52147e+06	6.70661e+06	23.402		8.8038e+06	8.88106e+06	8.80413e+06	8.88132e+06	-24.867	8.80549e+06	8.88275e+06	-0.113559
3.6365e+06	3.65081e+06	4164766	4153444	-5.09965	4211598	4311712	12.9827		6.06318e+06	6.16578e+06				6.25719e+06	6.36316e+06	9.844		8.8038e+06	8.88106e+06	8.80396e+06	8.88126e+06	19.789	8.80489e+06	8.88215e+06	-0.55961
3.6365e+06	3.65081e+06	4165494	4181185	0.260235	4298104	4368023	7.75334		6.06318e+06	6.16578e+06				6.58018e+06	6.82803e+06	30.072		8.8038e+06	8.88106e+06	8.80424e+06	8.88154e+06	8.8573	8.80495e+06	8.88192e+06	-34.913
3.6365e+06	3.65081e+06	4032926	3984506	-18.7986	4104230	4124046	1.16331		6.06318e+06	6.16578e+06				6.58467e+06	6.61901e+06	-6.9203		8.8038e+06	8.88106e+06				8.80476e+06	8.88202e+06	-0.69852
3.6365e+06	3.65081e+06	4052750	4013333	-14.8204	3978966	4059701	16.2448		6.06318e+06	6.16578e+06				6.37732e+06	6.54139e+06	24.506		8.8038e+06	8.88106e+06				8.80432e+06	8.8817e+06	18.877
3.6365e+06	3.65081e+06	4053716	4003469	-18.3058	3705786	3819714	58.9774		6.06318e+06	6.16578e+06				6.50649e+06	6.66228e+06	18.852		8.8038e+06	8.88106e+06				8.8042e+06	8.88151e+06	12.194
3.6365e+06	3.65081e+06	4250124	4304099	6.07144	4172386	4108443	-17.0996		6.06318e+06	6.16578e+06				6.51583e+06	6.67096e+06	18.539		8.8038e+06	8.88106e+06				8.80424e+06	8.88169e+06	30.92
3.6365e+06	3.65081e+06	3888580	3946568	14.7677	4450543	4435671	-3.71819		6.06318e+06	6.16578e+06				6.40369e+06	6.52095e+06	12.268		8.8038e+06	8.88106e+06				8.80452e+06	8.88191e+06	15.879
3.6365e+06	3.65081e+06	3957072	3957417	-4.55489	4249571	4215128	-8.63936		6.06318e+06	6.16578e+06				6.43411e+06	6.69403e+06	37.921		8.8038e+06	8.88106e+06				8.80478e+06	8.88236e+06	24.044
3.6365e+06	3.65081e+06	3821512	3871798	16.279	4035743	4156514	21.0517		6.06318e+06	6.16578e+06				6.24712e+06	6.31882e+06	-12.0484		8.8038e+06	8.88106e+06				8.8047e+06	8.88206e+06	10.675
3.6365e+06	3.65081e+06				4096114	4170686	11.5914		6.06318e+06	6.16578e+06				7.13308e+06	7.04491e+06	-13.5567		8.8038e+06	8.88106e+06				8.80493e+06	8.8823e+06	8.2328
3.6365e+06	3.65081e+06				4097886	4159857	9.36258		6.06318e+06	6.16578e+06				6.34059e+06	6.48986e+06	22.54		8.8038e+06	8.88106e+06				8.8046e+06	8.88187e+06	0.59621
3.6365e+06	3.65081e+06				4255229	4352086	11.7708		6.06318e+06	6.16578e+06				6.88523e+06	7.0334e+06	13.392		8.8038e+06	8.88106e+06				8.80428e+06	8.88152e+06	-5.0559
3.6365e+06	3.65081e+06				4039706	4157588	20.4371		6.06318e+06	6.16578e+06				6.40264e+06	6.52335e+06	13.203		8.8038e+06	8.88106e+06				8.80493e+06	8.88221e+06	1.707
3.6365e+06	3.65081e+06				4457157	4579114	11.596		6.06318e+06	6.16578e+06				6.43202e+06	6.55024e+06	12.203		8.8038e+06	8.88106e+06				8.80489e+06	8.88236e+06	16.162
3.6365e+06	3.65081e+06				3824614	3860914	10.4657											8.8038e+06	8.88106e+06				8.80457e+06	8.8816e+06	-43.995
3.6365e+06	3.65081e+06				3767086	3945014	55.6129											8.8038e+06	8.88106e+06				8.80429e+06	8.88153e+06	-3.3326
3.6365e+06	3.65081e+06				3807543	3869914	21.9346											8.8038e+06	8.88106e+06				8.80495e+06	8.88224e+06	3.0987
3.6365e+06	3.65081e+06				4767471	4713257	-6.44969											8.8038e+06	8.88106e+06				8.80497e+06	8.88218e+06	-4.4638
3.6365e+06	3.65081e+06				4446872	4527243	7.53737											8.8038e+06	8.88106e+06				8.80406e+06	8.88127e+06	-23.177
3.6365e+06	3.65081e+06				4291600	4217057	-15.6916											8.8038e+06	8.88106e+06				8.80517e+06	8.88236e+06	-5.3063
																		8.8038e+06	8.88106e+06				8.80459e+06	8.88189e+06	4.699
																		8.8038e+06	8.88106e+06				8.80493e+06	8.88225e+06	4.7593
																		8.8038e+06	8.88106e+06				8.80508e+06	8.88225e+06	-7.5821
																		8.8038e+06	8.88106e+06				8.80447e+06	8.88168e+06	-8.6905
																		8.8038e+06	8.88106e+06				8.80439e+06	8.88147e+06	-43.067
