# Supplementary material for: A FRET-based study reveals site-specific regulation of spindle position checkpoint proteins at yeast centrosomes
Source: eLife. 2016 May 9;5:e14029. doi: 10.7554/eLife.14029 (PMC4878874; doi:10.7554/eLife.14029)
Supplement: Figure 2—figure supplement 1—source data 1. — DOI: http://dx.doi.org/10.7554/eLife.14029.014 [file elife-14029-fig2-figsupp1-data1.xls]

## Sheet: Description
Description:
Data presented here are identical to Figure 3A Gal1-clb2∆DB and Figure 2C Gal1-Cdc20 dSPB measurements.
List of Abbreviations
Raw Mean Fluoresence Intensity before bleach (Donor/Aceptor): FL (DA) bb
Raw Mean Fluoresence Intensity before bleach (Donor only): FL (D) bb
Raw Mean Fluoresence Intensity before bleach (Background): FL (bg) bb
Raw Mean Fluoresence Intensity after bleach (Donor/Aceptor): FL (DA) ab
Raw Mean Fluoresence Intensity after bleach (Donor only): FL (D) ab
RawMean Fluoresence Intensity after bleach (Background): FL (bg) ab
Calculated FRET efficiency % for the indicated Donor/Acceptor pai) : FRET % (DA)
Calculated FRET efficiency % background for Donor only sample : FRET % (D)

## Sheet: Experiment1 
pair: Nud1-mTUR Bfa1-EYFP									pair: Nud1-mTUR Bfa1-eYFP
condition: Gal1-CDC20, signals at the daughter SPB									condition: Gal1-clb2∆DB over expression
P=0,019*10¯⁸									P=0,000130174
FL(bg)bb	FL(bg)ab	FL(D)bb	FL(D)ab	FRET (D) %	FL(DA)bb	FL(DA)ab	FRET(DA) %		FL(bg)bb	FL(bg)ab	FL(DA)bb dSPB	FL(DA)ab dSPB	FRET(DA) % dSPB	FL(bg)bb	FL(bg)ab	FL(D)bb dSPB	FL(D)ab dSPB	FRET(D) %
5.06736e+06	5.02938e+06	5.06929e+06	5.0313e+06	6.49978	5.06911e+06	5.03127e+06	14.385		6.57235e+06	6.53768e+06	6.57306e+06	6.53832e+06	-1.4129	6.57235e+06	6.53768e+06	6.57281e+06	6.53811e+06	3.1451
5.06736e+06	5.02938e+06	5.06939e+06	5.03131e+06	2.2819	5.06915e+06	5.03119e+06	8.1529		6.57235e+06	6.53768e+06	6.57265e+06	6.53789e+06	-32.66	6.57235e+06	6.53768e+06	6.57312e+06	6.53836e+06	-2.673
5.06736e+06	5.02938e+06	5.06845e+06	5.0306e+06	17.98	5.06772e+06	5.02972e+06	3.9764		6.57235e+06	6.53768e+06	6.57397e+06	6.53907e+06	-6.2051	6.57235e+06	6.53768e+06	6.57265e+06	6.53794e+06	-7.9379
5.06736e+06	5.02938e+06	5.06819e+06	5.03001e+06	-24.265	5.06816e+06	5.03018e+06	7.88257		6.57235e+06	6.53768e+06	6.57442e+06	6.53966e+06	5.9744	6.57235e+06	6.53768e+06	6.57316e+06	6.53845e+06	4.9043
5.06736e+06	5.02938e+06	5.0684e+06	5.03027e+06	-8.426	5.06898e+06	5.03137e+06	26.272		6.57235e+06	6.53768e+06	6.57352e+06	6.53914e+06	30.372	6.57235e+06	6.53768e+06	6.57291e+06	6.53825e+06	12.178
5.06736e+06	5.02938e+06	5.06803e+06	5.02996e+06	-7.944	5.06917e+06	5.03088e+06	-12.709		6.57235e+06	6.53768e+06	6.57273e+06	6.53823e+06	42.137	6.57235e+06	6.53768e+06	6.57336e+06	6.53858e+06	-1.0868
5.06736e+06	5.02938e+06	5.06866e+06	5.03059e+06	0.0031	5.06873e+06	5.03091e+06	17.36		6.57235e+06	6.53768e+06	6.5735e+06	6.53906e+06	26.751	6.57235e+06	6.53768e+06	6.57324e+06	6.53865e+06	18.814
5.06736e+06	5.02938e+06	5.06807e+06	5.0301e+06	10.2988	5.06829e+06	5.03048e+06	22.798		6.57235e+06	6.53768e+06	6.57286e+06	6.53835e+06	34.374	6.57235e+06	6.53768e+06	6.57283e+06	6.53814e+06	3.9752
5.06736e+06	5.02938e+06	5.06861e+06	5.03041e+06	-13.198	5.06817e+06	5.03038e+06	26.657		6.57235e+06	6.53768e+06	6.57325e+06	6.53858e+06	10.315	6.57235e+06	6.53768e+06	6.57341e+06	6.53872e+06	8.4001
5.06736e+06	5.02938e+06	5.06837e+06	5.03016e+06	-22.132	5.06822e+06	5.03038e+06	22.169		6.57235e+06	6.53768e+06	6.57342e+06	6.53879e+06	14.259	6.57235e+06	6.53768e+06	6.57328e+06	6.53856e+06	4.9091
5.06736e+06	5.02938e+06	5.06848e+06	5.0303e+06	-13.833	5.06795e+06	5.03019e+06	34.31		6.57235e+06	6.53768e+06	6.57314e+06	6.5388e+06	40.372	6.57235e+06	6.53768e+06	6.5736e+06	6.53899e+06	14.497
5.06736e+06	5.02938e+06	5.06831e+06	5.03008e+06	-26.456	5.06849e+06	5.03058e+06	13.2956		6.57235e+06	6.53768e+06	6.57355e+06	6.53878e+06	1.1066	6.57235e+06	6.53768e+06	6.57331e+06	6.53858e+06	3.6132
5.06736e+06	5.02938e+06	5.06762e+06	5.02965e+06	12.3251	5.06841e+06	5.03063e+06	23.451		6.57235e+06	6.53768e+06	6.57255e+06	6.53807e+06	60.345	6.57235e+06	6.53768e+06	6.57278e+06	6.538e+06	-23.192
5.06736e+06	5.02938e+06	5.06871e+06	5.03061e+06	-2.193	5.06854e+06	5.03067e+06	15.8218		6.57235e+06	6.53768e+06	6.57344e+06	6.53864e+06	-3.6562	6.57235e+06	6.53768e+06	6.57248e+06	6.53783e+06	18.133
5.06736e+06	5.02938e+06	5.06757e+06	5.02955e+06	-9.429	5.06804e+06	5.03014e+06	18.299		6.57235e+06	6.53768e+06	6.57271e+06	6.53825e+06	47.072	6.57235e+06	6.53768e+06	6.57267e+06	6.53793e+06	-18.314
5.06736e+06	5.02938e+06	5.06942e+06	5.03146e+06	8.533	5.06808e+06	5.03022e+06	22.297		6.57235e+06	6.53768e+06	6.5729e+06	6.5382e+06	3.526	6.57235e+06	6.53768e+06	6.57336e+06	6.53847e+06	-17.821
5.06736e+06	5.02938e+06	5.07e+06	5.03197e+06	5.5707	5.06824e+06	5.03029e+06	10.9258		6.57235e+06	6.53768e+06	6.57323e+06	6.53843e+06	-7.8947	6.57235e+06	6.53768e+06	6.57355e+06	6.53883e+06	6.5284
5.06736e+06	5.02938e+06	5.06825e+06	5.03005e+06	-25.309	5.0689e+06	5.03112e+06	18.728		6.57235e+06	6.53768e+06	6.57364e+06	6.53899e+06	12.508	6.57235e+06	6.53768e+06	6.57455e+06	6.53976e+06	4.2532
5.06736e+06	5.02938e+06	5.06883e+06	5.03077e+06	1.2865	5.06774e+06	5.02994e+06	40.289		6.57235e+06	6.53768e+06	6.5728e+06	6.53836e+06	43.995	6.57235e+06	6.53768e+06	6.57356e+06	6.53862e+06	-17.963
5.06736e+06	5.02938e+06	5.06974e+06	5.03151e+06	-4.255	5.06825e+06	5.03035e+06	16.4397		6.57235e+06	6.53768e+06	6.57383e+06	6.53918e+06	11.12	6.57235e+06	6.53768e+06	6.57372e+06	6.53901e+06	7.384
5.06736e+06	5.02938e+06	5.06938e+06	5.03131e+06	2.2599	5.06781e+06	5.02991e+06	23.921		6.57235e+06	6.53768e+06	6.5732e+06	6.53859e+06	17.554	6.57235e+06	6.53768e+06	6.57364e+06	6.53897e+06	10.456
5.06736e+06	5.02938e+06	5.0682e+06	5.03022e+06	7.79968	5.06896e+06	5.031e+06	8.2408		6.57235e+06	6.53768e+06	6.57333e+06	6.53869e+06	13.223	6.57235e+06	6.53768e+06	6.57287e+06	6.5381e+06	-13.143
5.06736e+06	5.02938e+06	5.06835e+06	5.03057e+06	24.124	5.06823e+06	5.03046e+06	26.751		6.57235e+06	6.53768e+06	6.57371e+06	6.53899e+06	6.6973	6.57235e+06	6.53768e+06	6.57302e+06	6.53826e+06	-5.1344
5.06736e+06	5.02938e+06	5.0689e+06	5.03092e+06	7.21796	5.07111e+06	5.03312e+06	6.82734		6.57235e+06	6.53768e+06	6.57298e+06	6.53819e+06	-13.742	6.57235e+06	6.53768e+06	6.57257e+06	6.53788e+06	-3.1289
5.06736e+06	5.02938e+06	5.06899e+06	5.03094e+06	2.628	5.06994e+06	5.03185e+06	2.6914		6.57235e+06	6.53768e+06	6.57376e+06	6.53918e+06	16.139	6.57235e+06	6.53768e+06	6.57285e+06	6.53808e+06	-14.256
5.06736e+06	5.02938e+06	5.06906e+06	5.03088e+06	-6.06	5.06847e+06	5.03068e+06	22.601		6.57235e+06	6.53768e+06	6.57414e+06	6.53945e+06	9.1227	6.57235e+06	6.53768e+06	6.5735e+06	6.53882e+06	9.396
5.06736e+06	5.02938e+06	5.06815e+06	5.03019e+06	9.7785	5.06864e+06	5.03104e+06	30.211		6.57235e+06	6.53768e+06	6.57351e+06	6.53889e+06	14.255	6.57235e+06	6.53768e+06	6.57438e+06	6.53964e+06	6.7113
5.06736e+06	5.02938e+06	5.06825e+06	5.0302e+06	0.2299	5.06915e+06	5.03099e+06	-3.612		6.57235e+06	6.53768e+06	6.57402e+06	6.53916e+06	-2.2434	6.57235e+06	6.53768e+06	6.57343e+06	6.5387e+06	4.8522
5.06736e+06	5.02938e+06	5.06886e+06	5.03073e+06	-3.466	5.06808e+06	5.03021e+06	20.456		6.57235e+06	6.53768e+06	6.57389e+06	6.53946e+06	23.841	6.57235e+06	6.53768e+06	6.57309e+06	6.53854e+06	23.648
5.06736e+06	5.02938e+06	5.0682e+06	5.03036e+06	22.061	5.06937e+06	5.03142e+06	8.7674		6.57235e+06	6.53768e+06	6.57306e+06	6.53859e+06	31.908	6.57235e+06	6.53768e+06	6.57449e+06	6.53973e+06	6.1142
5.06736e+06	5.02938e+06	5.06806e+06	5.02992e+06	-20.641	5.06845e+06	5.03065e+06	21.628		6.57235e+06	6.53768e+06	6.57282e+06	6.53837e+06	42.131	6.57235e+06	6.53768e+06	6.57336e+06	6.53866e+06	7.52
5.06736e+06	5.02938e+06	5.06886e+06	5.03087e+06	6.8214	5.06826e+06	5.03029e+06	8.4537		6.57235e+06	6.53768e+06	6.5736e+06	6.53881e+06	-0.31003	6.57235e+06	6.53768e+06	6.57386e+06	6.53901e+06	-3.8572
5.06736e+06	5.02938e+06	5.06898e+06	5.03084e+06	-3.819	5.06774e+06	5.02997e+06	43		6.57235e+06	6.53768e+06	6.57276e+06	6.53808e+06	7.5874	6.57235e+06	6.53768e+06	6.57333e+06	6.53842e+06	-21.208
5.06736e+06	5.02938e+06	5.0679e+06	5.02982e+06	-14.243	5.06884e+06	5.03101e+06	16.6773		6.57235e+06	6.53768e+06	6.57278e+06	6.53813e+06	14.555	6.57235e+06	6.53768e+06	6.57338e+06	6.53862e+06	0.69016
5.06736e+06	5.02938e+06	5.06848e+06	5.03026e+06	-19.278	5.06901e+06	5.0312e+06	16.6702		6.57235e+06	6.53768e+06	6.57354e+06	6.53891e+06	13.074	6.57235e+06	6.53768e+06	6.5734e+06	6.53853e+06	-14.435
5.06736e+06	5.02938e+06				5.06875e+06	5.03078e+06	8.138		6.57235e+06	6.53768e+06	6.57404e+06	6.53923e+06	1.1562	6.57235e+06	6.53768e+06	6.57338e+06	6.53867e+06	5.9013
5.06736e+06	5.02938e+06				5.06987e+06	5.03207e+06	14.0356		6.57235e+06	6.53768e+06	6.57315e+06	6.53848e+06	10.621	6.57235e+06	6.53768e+06	6.57326e+06	6.53836e+06	-24.367
5.06736e+06	5.02938e+06				5.07014e+06	5.03223e+06	9.6967		6.57235e+06	6.53768e+06	6.57252e+06	6.53784e+06	3.4606	6.57235e+06	6.53768e+06	6.57337e+06	6.53862e+06	2.2908
5.06736e+06	5.02938e+06				5.0684e+06	5.03043e+06	8.5158		6.57235e+06	6.53768e+06	6.5737e+06	6.53932e+06	27.94	6.57235e+06	6.53768e+06	6.57377e+06	6.53919e+06	16.452
5.06736e+06	5.02938e+06				5.06931e+06	5.03147e+06	13.7646		6.57235e+06	6.53768e+06	6.57328e+06	6.53862e+06	11.779	6.57235e+06	6.53768e+06	6.57327e+06	6.5386e+06	10.125
5.06736e+06	5.02938e+06				5.0678e+06	5.02996e+06	31.82		6.57235e+06	6.53768e+06	6.57332e+06	6.53853e+06	-3.5359	6.57235e+06	6.53768e+06	6.5741e+06	6.53938e+06	7.5437
5.06736e+06	5.02938e+06				5.06769e+06	5.02974e+06	17.023		6.57235e+06	6.53768e+06	6.57287e+06	6.53825e+06	18.97	6.57235e+06	6.53768e+06	6.57343e+06	6.5386e+06	-7.5493
5.06736e+06	5.02938e+06				5.06864e+06	5.03071e+06	10.525		6.57235e+06	6.53768e+06	6.5732e+06	6.53832e+06	-22.45	6.57235e+06	6.53768e+06	6.57364e+06	6.53895e+06	8.8909
5.06736e+06	5.02938e+06				5.06808e+06	5.03034e+06	32.727		6.57235e+06	6.53768e+06	6.57317e+06	6.53866e+06	27.379	6.57235e+06	6.53768e+06	6.57355e+06	6.53871e+06	-5.9063
5.06736e+06	5.02938e+06				5.06853e+06	5.03047e+06	0.0518		6.57235e+06	6.53768e+06	6.57311e+06	6.5387e+06	36.494	6.57235e+06	6.53768e+06	6.57418e+06	6.53951e+06	10.263
5.06736e+06	5.02938e+06				5.06822e+06	5.03026e+06	9.9405		6.57235e+06	6.53768e+06	6.57343e+06	6.53849e+06	-23.156
5.06736e+06	5.02938e+06				5.06823e+06	5.03013e+06	-9.05		6.57235e+06	6.53768e+06	6.57391e+06	6.53921e+06	8.5319
5.06736e+06	5.02938e+06				5.06765e+06	5.02971e+06	19.969		6.57235e+06	6.53768e+06	6.57255e+06	6.53786e+06	0.078269
5.06736e+06	5.02938e+06				5.06894e+06	5.03067e+06	-14.597		6.57235e+06	6.53768e+06	6.57315e+06	6.53857e+06	20.224
5.06736e+06	5.02938e+06				5.06758e+06	5.02965e+06	26.279		6.57235e+06	6.53768e+06	6.57291e+06	6.53821e+06	4.4398
5.06736e+06	5.02938e+06				5.06808e+06	5.03045e+06	40.031		6.57235e+06	6.53768e+06	6.57381e+06	6.53918e+06	13.21
5.06736e+06	5.02938e+06				5.06836e+06	5.0303e+06	-0.3785		6.57235e+06	6.53768e+06	6.57252e+06	6.53791e+06	33.349
5.06736e+06	5.02938e+06				5.06825e+06	5.03012e+06	-11.098		6.57235e+06	6.53768e+06	6.5731e+06	6.53834e+06	-2.8911
5.06736e+06	5.02938e+06				5.06793e+06	5.03007e+06	25.374		6.57235e+06	6.53768e+06	6.5732e+06	6.53845e+06	-0.38816
5.06736e+06	5.02938e+06				5.06798e+06	5.03016e+06	27.67		6.57235e+06	6.53768e+06	6.57285e+06	6.53817e+06	8.3465
5.06736e+06	5.02938e+06				5.06842e+06	5.03075e+06	30.491		6.57235e+06	6.53768e+06	6.57331e+06	6.53868e+06	13.635
5.06736e+06	5.02938e+06				5.06772e+06	5.02985e+06	32.651		6.57235e+06	6.53768e+06	6.57371e+06	6.53884e+06	-7.0642
5.06736e+06	5.02938e+06				5.0685e+06	5.03078e+06	26.079		6.57235e+06	6.53768e+06	6.57282e+06	6.53826e+06	28.935
5.06736e+06	5.02938e+06				5.0685e+06	5.03048e+06	4.1775		6.57235e+06	6.53768e+06	6.57282e+06	6.53826e+06	28.379
5.06736e+06	5.02938e+06				5.06821e+06	5.0305e+06	32.299		6.57235e+06	6.53768e+06	6.57322e+06	6.53848e+06	1.8941
5.06736e+06	5.02938e+06				5.06776e+06	5.02986e+06	26.368		6.57235e+06	6.53768e+06	6.57273e+06	6.53817e+06	32.708
5.06736e+06	5.02938e+06				5.06772e+06	5.02991e+06	39.319		6.57235e+06	6.53768e+06	6.57335e+06	6.53863e+06	5.3942
5.06736e+06	5.02938e+06				5.0682e+06	5.03052e+06	33.961		6.57235e+06	6.53768e+06	6.57274e+06	6.53808e+06	13.072
5.06736e+06	5.02938e+06				5.06854e+06	5.03048e+06	0.0101		6.57235e+06	6.53768e+06	6.57313e+06	6.53835e+06	-7.3653
5.06736e+06	5.02938e+06				5.06872e+06	5.03072e+06	5.4651		6.57235e+06	6.53768e+06	6.57262e+06	6.5381e+06	46.885
5.06736e+06	5.02938e+06				5.06847e+06	5.03054e+06	12.3494		6.57235e+06	6.53768e+06	6.57383e+06	6.53924e+06	15.645
5.06736e+06	5.02938e+06				5.06866e+06	5.03098e+06	26.405		6.57235e+06	6.53768e+06	6.57266e+06	6.53802e+06	18.645
5.06736e+06	5.02938e+06				5.0684e+06	5.03049e+06	14.4254		6.57235e+06	6.53768e+06	6.57299e+06	6.53831e+06	9.204
5.06736e+06	5.02938e+06				5.06871e+06	5.03095e+06	21.443
5.06736e+06	5.02938e+06				5.06909e+06	5.03087e+06	-8.335
5.06736e+06	5.02938e+06				5.06819e+06	5.03016e+06	1.1912
5.06736e+06	5.02938e+06				5.06822e+06	5.0304e+06	23.36
5.06736e+06	5.02938e+06				5.0685e+06	5.0307e+06	21.475
5.06736e+06	5.02938e+06				5.07063e+06	5.0327e+06	8.7356
5.06736e+06	5.02938e+06				5.06788e+06	5.02984e+06	-4.451
5.06736e+06	5.02938e+06				5.06923e+06	5.03149e+06	18.361
5.06736e+06	5.02938e+06				5.06835e+06	5.03053e+06	21.611
5.06736e+06	5.02938e+06				5.06926e+06	5.03136e+06	11.2457
5.06736e+06	5.02938e+06				5.06815e+06	5.03042e+06	31.694
5.06736e+06	5.02938e+06				5.06835e+06	5.03033e+06	2.4686
5.06736e+06	5.02938e+06				5.06882e+06	5.0308e+06	4.8432
5.06736e+06	5.02938e+06				5.06791e+06	5.03011e+06	32.38

## Sheet: Experiment2
pair: Nud1-mTUR Bfa1-EYFP									pair: Nud1-mTUR Bfa1-EYFP
condition: Gal1-CDC20, signals at the daughter SPB									condition: Gal1-clb2DDB oe
P=0,00012									P=0,007
FL(bg)bb	FL(bg)ab	FL(D)bb	FL(D)ab	FRET (D) %	FL(DA)bb	FL(DA)ab	FRET(DA) %		FL(bg)bb	FL(bg)ab	FL(D)bb	FL(D)ab	FRET (D) %	FL(DA)bb	FL(DA)ab	FRET(DA) %
4.39619e+06	4.42135e+06	5392146	5340655	-5.70737	5879676	5848902	-1.28783		5748936	5651308	5751037	5653204	-7.21	5652307	5652204	-7.81
4.39619e+06	4.42135e+06	7694018	7618473	-0.51971	5709127	5756284	4.27815		5748936	5651308	5752137	5654576	5.66	5651497	5651487	-1.69
4.39619e+06	4.42135e+06	6786891	6924746	7.13187	5856843	5699618	-11.6377		5748936	5651308	5751415	5653712	0.47	5653185	5653352	11.85
4.39619e+06	4.42135e+06	7248227	7311164	3.93741	6511726	6615618	6.21829		5748936	5651308	5751281	5653561	-0.48	5652634	5652656	5.33
4.39619e+06	4.42135e+06	7321864	7418409	5.01199	6325167	6344931	2.34973		5748936	5651308	5750863	5653140	-1.61	5653017	5653195	13.08
4.39619e+06	4.42135e+06	6007563	5982573	-0.581911	6200039	6292147	6.20883		5748936	5651308	5750219	5652250	-32.69	5652476	5652541	8.95
4.39619e+06	4.42135e+06	6643391	6610854	-0.00493966	5331735	5517627	17.292		5748936	5651308	5751118	5653117	-17.01	5653734	5654002	13.65
4.39619e+06	4.42135e+06	6850437	6737791	-3.31882	6119186	6079480	-1.2817		5748936	5651308	5751018	5653442	6.02	5652860	5652904	6.65
4.39619e+06	4.42135e+06	6429300	6607336	9.62366	5249186	5498343	23.4287		5748936	5651308	5750117	5652318	-13.39	5652832	5652932	9.65
4.39619e+06	4.42135e+06	7318373	7474873	6.93141	5933647	5958412	2.60461		5748936	5651308	5750232	5652552	-0.61	5652001	5652170	23.65
4.39619e+06	4.42135e+06	5814100	5817409	1.06516	5673461	5786608	9.07505		5748936	5651308	5750809	5653269	8.11	5651761	5651808	12.65
4.39619e+06	4.42135e+06	4769727	4734845	-16.5207	5278608	5412774	13.6253		5748936	5651308	5751355	5653750	4.57	5652972	5653103	10.65
4.39619e+06	4.42135e+06	4794482	4792182	-4.7736	5065402	5079176	0.899885		5748936	5651308	5751047	5653455	5.28	5652879	5652739	-6.15
4.39619e+06	4.42135e+06	5365282	5261336	-12.7394	5499392	5514421	1.7036		5748936	5651308	5751298	5653513	-3.51	5652851	5652866	4.63
4.39619e+06	4.42135e+06	6292800	6075636	-12.0179	5083480	5192069	13.4554		5748936	5651308	5749402	5651929	28.4	5653253	5653007	-10.83
4.39619e+06	4.42135e+06	6297082	6274264	0.040937	5227696	5400833	17.7381		5748936	5651308	5750213	5652475	-5.81	5652468	5652343	-8.36
4.39619e+06	4.42135e+06	5315418	5376418	6.3831	5804049	5873520	5.68169		5748936	5651308	5751160	5653530	3.54	5652587	5652550	0.63
4.39619e+06	4.42135e+06	5479791	5555173	7.05985	5980167	6159510	11.5007		5748936	5651308	5751436	5653857	5.51	5652951	5653007	6.65
4.39619e+06	4.42135e+06	5307582	5367945	6.3494	5794900	5878673	6.65228		5748936	5651308	5750867	5653181	0.51	5652785	5652829	6.65
4.39619e+06	4.42135e+06	5565600	5563945	0.283576	5880755	5897774	2.07893		5748936	5651308	5751016	5653025	-17.56	5652175	5652138	-0.35
4.39619e+06	4.42135e+06	5275291	5325291	5.37849	7167588	7379824	8.95355		5748936	5651308	5750102	5652531	8.25	5652901	5653097	14.65
4.39619e+06	4.42135e+06	5017509	5017018	-1.67543	4908039	4964657	8.42094		5748936	5651308	5751452	5653492	-11.58	5652608	5652476	-7.35
4.39619e+06	4.42135e+06	5150482	5142291	-1.99535	5195500	5310951	12.7801		5748936	5651308	5750653	5652946	-1.19	5652550	5652560	4.65
4.39619e+06	4.42135e+06	4961027	4868800	-23.6034	4891039	4955921	10.0615		5748936	5651308	5750389	5652899	12.29	5652785	5652758	1.65
4.39619e+06	4.42135e+06	4736764	4761873	2.61643	5648382	5870608	16.228		5748936	5651308	5750069	5652430	2.63	5653172	5653183	4.65
4.39619e+06	4.42135e+06	5289500	5321082	3.3443	5990765	5992500	1.13936		5748936	5651308	5750532	5652745	-7.46	5653379	5653293	-0.35
4.39619e+06	4.42135e+06	5543373	5514518	-2.31069	5540186	5693520	12.7056		5748936	5651308				5652633	5652706	8.65
4.39619e+06	4.42135e+06	5207309	5272836	7.37131	4740353	4720961	-12.2382		5748936	5651308				5652183	5652225	8.65
4.39619e+06	4.42135e+06	5396382	5397682	0.186659	5998882	5939318	-2.95108		5748936	5651308				5651432	5651486	34.65
4.39619e+06	4.42135e+06	5746036	5869409	9.4127	6071173	5920455	-9.10185		5748936	5651308				5652462	5652592	13.65
4.39619e+06	4.42135e+06	5211018	5178291	-5.01682	5768736	6045336	18.1132		5748936	5651308				5651951	5651954	4.65
4.39619e+06	4.42135e+06	5181136	5232464	5.85676	5385764	5325182	-6.85593		5748936	5651308				5651643	5651701	18.65
4.39619e+06	4.42135e+06	4804882	4718218	-35.0358	6310464	6468536	9.12265		5748936	5651308				5651742	5651796	14.65
4.39619e+06	4.42135e+06	5677909	5634009	-3.06451	5838336	5809882	-1.23084
4.39619e+06	4.42135e+06	5387891	5262391	-15.2829	5866464	6056227	12.6985
4.39619e+06	4.42135e+06	5600118	5458764	-13.4204	5231518	5417555	18.7794
4.39619e+06	4.42135e+06	4711800	4647091	-37.1779	4979479	5044491	9.02607
4.39619e+06	4.42135e+06	5254655	5324636	7.5925	5573933	5580576	1.03306
4.39619e+06	4.42135e+06	5767818	5753318	-0.347181	4941618	5009354	9.87153
4.39619e+06	4.42135e+06				5344746	5408036	6.49492
4.39619e+06	4.42135e+06				6336000	6340164	1.53603
4.39619e+06	4.42135e+06				5993691	6041409	4.02271
