# Supplementary material for: A FRET-based study reveals site-specific regulation of spindle position checkpoint proteins at yeast centrosomes
Source: eLife. 2016 May 9;5:e14029. doi: 10.7554/eLife.14029 (PMC4878874; doi:10.7554/eLife.14029)
Supplement: Figure 2—figure supplement 1—source data 2. — DOI: http://dx.doi.org/10.7554/eLife.14029.015 [file elife-14029-fig2-figsupp1-data2.xlsx]

## Sheet: Description
Description:
Data presented here are identical to Figure 3B Gal1-clb2∆DB and Figure 2D Gal1-Cdc20 dSPB measurements.
List of Abbreviations
Raw Mean Fluoresence Intensity before bleach (Donor/Aceptor): FL (DA) bb
Raw Mean Fluoresence Intensity before bleach (Donor only): FL (D) bb
Raw Mean Fluoresence Intensity before bleach (Background): FL (bg) bb
Raw Mean Fluoresence Intensity after bleach (Donor/Aceptor): FL (DA) ab
Raw Mean Fluoresence Intensity after bleach (Donor only): FL (D) ab
RawMean Fluoresence Intensity after bleach (Background): FL (bg) ab
Calculated FRET efficiency % for the indicated Donor/Acceptor pair) : FRET % (DA)
Calculated FRET efficiency % background for Donor only sample : FRET % (D)
daughter SPB: dSPB
mother SPB: mSPB
P-value for the indicated pair FRET % (DA) and FRET % (D) according to students t-test: P

## Sheet: Experiment 1
pair: Spc72-mTUR Bfa1-EYFP									pair: Spc72-mTUR Bfa1-EYFP
condition: Gal1-CDC20, signals at the daughter SPB									condition: Gal1-clb2DDB oe
P=0,000420787									P=0.00003
									FL(bg)bb	FL(bg)ab	FL(DA)bb dSPB	FL(DA)ab dSPB	FRET(DA) % dSPB	FL(D)bb dSPB	FL(D)ab dSPB	FRET(D) %
FL(bg)bb	FL(bg)ab	FL(DA)bb dSPB	FL(DA)ab dSPB	FRET(DA) % dSPB	FL(D)bb	FL(D)ab	FRET(D) %		6.45072e+06	5.99967e+06	6.45084e+06	5.99982e+06	24.729	6.45072e+06	5.99967e+06	12.187
6.90308e+06	6.82173e+06	6.90375e+06	6.8228e+06	42.203	6.90396e+06	6.82247e+06	-18.278		6.45072e+06	5.99967e+06	6.45159e+06	6.00078e+06	22.92	6.45072e+06	5.99967e+06	-27.495
6.90308e+06	6.82173e+06	6.90345e+06	6.82227e+06	37.755	6.90391e+06	6.82252e+06	-5.354		6.45072e+06	5.99967e+06	6.45125e+06	6.00045e+06	34.147	6.45072e+06	5.99967e+06	-1.7459
6.90308e+06	6.82173e+06	6.90366e+06	6.82228e+06	0.72796	6.9036e+06	6.82237e+06	19.973		6.45072e+06	5.99967e+06	6.45142e+06	6.00075e+06	36.481	6.45072e+06	5.99967e+06	-7.7701
6.90308e+06	6.82173e+06	6.9033e+06	6.82207e+06	39.837	6.90455e+06	6.82318e+06	-1.1599		6.45072e+06	5.99967e+06	6.45103e+06	6.00011e+06	31.958	6.45072e+06	5.99967e+06	24.716
6.90308e+06	6.82173e+06	6.90357e+06	6.82232e+06	22.118	6.90415e+06	6.82283e+06	3.1588		6.45072e+06	5.99967e+06	6.4517e+06	6.0008e+06	14.77	6.45072e+06	5.99967e+06	15.31
6.90308e+06	6.82173e+06	6.90423e+06	6.82274e+06	-8.8053	6.90358e+06	6.82242e+06	27.767		6.45072e+06	5.99967e+06	6.45091e+06	6e+06	44.782	6.45072e+06	5.99967e+06	-5.6773
6.90308e+06	6.82173e+06	6.90365e+06	6.82268e+06	44.752	6.90503e+06	6.82388e+06	9.4021		6.45072e+06	5.99967e+06	6.45132e+06	6.00034e+06	11.983	6.45072e+06	5.99967e+06	-11.707
6.90308e+06	6.82173e+06	6.90337e+06	6.82206e+06	17.965	6.9049e+06	6.82328e+06	-16.789		6.45072e+06	5.99967e+06	6.45102e+06	5.99997e+06	2.1867	6.45072e+06	5.99967e+06	11.101
6.90308e+06	6.82173e+06	6.9035e+06	6.82229e+06	30.8	6.90424e+06	6.82254e+06	-42.623		6.45072e+06	5.99967e+06	6.45103e+06	6.00011e+06	30.522	6.45072e+06	5.99967e+06	25.313
6.90308e+06	6.82173e+06	6.90389e+06	6.8225e+06	-0.2	6.90396e+06	6.82273e+06	12.445		6.45072e+06	5.99967e+06	6.45153e+06	6.0005e+06	4.1861	6.45072e+06	5.99967e+06	-23.399
6.90308e+06	6.82173e+06	6.90349e+06	6.82223e+06	23.044	6.9035e+06	6.82201e+06	-51.893		6.45072e+06	5.99967e+06	6.45092e+06	5.9999e+06	15.274	6.45072e+06	5.99967e+06	-2.3401
6.90308e+06	6.82173e+06	6.90368e+06	6.82241e+06	17.239	6.90455e+06	6.82308e+06	-9.2835		6.45072e+06	5.99967e+06	6.45133e+06	6.00037e+06	14.998	6.45072e+06	5.99967e+06	-5.5212
6.90308e+06	6.82173e+06	6.90458e+06	6.82305e+06	-8.2	6.90429e+06	6.82267e+06	-28.002		6.45072e+06	5.99967e+06	6.45098e+06	6.00002e+06	28.458	6.45072e+06	5.99967e+06	14.519
6.90308e+06	6.82173e+06	6.90554e+06	6.82453e+06	16.8	6.90316e+06	6.82179e+06	-22.021		6.45072e+06	5.99967e+06	6.45133e+06	6.00051e+06	28.661	6.45072e+06	5.99967e+06	9.1538
6.90308e+06	6.82173e+06	6.90311e+06	6.82178e+06	61.8	6.90444e+06	6.82298e+06	-8.4404		6.45072e+06	5.99967e+06	6.45155e+06	6.00051e+06	2.2153	6.45072e+06	5.99967e+06	12.081
6.90308e+06	6.82173e+06	6.90351e+06	6.82206e+06	-24.2	6.90416e+06	6.8228e+06	0		6.45072e+06	5.99967e+06	6.45106e+06	5.99995e+06	-19.804	6.45072e+06	5.99967e+06	-2.2567
6.90308e+06	6.82173e+06	6.90318e+06	6.82183e+06	10.8	6.90405e+06	6.82253e+06	-20		6.45072e+06	5.99967e+06	6.4511e+06	6.00006e+06	5.3227	6.45072e+06	5.99967e+06	-6.4711
6.90308e+06	6.82173e+06	6.90462e+06	6.82338e+06	11.398	6.90517e+06	6.82383e+06	0		6.45072e+06	5.99967e+06	6.45186e+06	6.00084e+06	4.1748	6.45072e+06	5.99967e+06	-0.64488
6.90308e+06	6.82173e+06	6.90345e+06	6.82199e+06	-35.839	6.90443e+06	6.82335e+06	17		6.45072e+06	5.99967e+06	6.45116e+06	6.00005e+06	-13.393	6.45072e+06	5.99967e+06	23.173
6.90308e+06	6.82173e+06	6.90332e+06	6.82217e+06	50.8	6.90339e+06	6.82224e+06	39		6.45072e+06	5.99967e+06	6.45093e+06	5.99995e+06	23.662	6.45072e+06	5.99967e+06	-5.2147
6.90308e+06	6.82173e+06	6.90321e+06	6.82218e+06	76.8	6.90467e+06	6.82329e+06	-2		6.45072e+06	5.99967e+06	6.45094e+06	6.00005e+06	44.203	6.45072e+06	5.99967e+06	5.7471
6.90308e+06	6.82173e+06	6.9037e+06	6.8227e+06	40.8	6.90564e+06	6.82442e+06	5		6.45072e+06	5.99967e+06	6.45146e+06	6.00034e+06	-9.3153	6.45072e+06	5.99967e+06	19.333
6.90308e+06	6.82173e+06	6.90511e+06	6.82376e+06	4.8	6.90432e+06	6.82285e+06	-11		6.45072e+06	5.99967e+06	6.45133e+06	6.00032e+06	7.1684	6.45072e+06	5.99967e+06	11.8
6.90308e+06	6.82173e+06	6.90325e+06	6.82193e+06	24.8	6.90435e+06	6.82297e+06	-2		6.45072e+06	5.99967e+06	6.45082e+06	5.99986e+06	49.168	6.45072e+06	5.99967e+06	24.339
6.90308e+06	6.82173e+06	6.90435e+06	6.82308e+06	10.8	6.90524e+06	6.82361e+06	-15		6.45072e+06	5.99967e+06	6.45163e+06	6.00046e+06	-13.724	6.45134e+06	6.00026e+06	-3.5005
6.90308e+06	6.82173e+06	6.90368e+06	6.82243e+06	18.8					6.45072e+06	5.99967e+06	6.45126e+06	6.00042e+06	29.746	6.45168e+06	5.99967e+06	4.6247
6.90308e+06	6.82173e+06	6.90352e+06	6.82217e+06	6.8					6.45072e+06	5.99967e+06	6.45106e+06	6.0001e+06	24.024	6.45163e+06	5.99967e+06	4.1173
6.90308e+06	6.82173e+06	6.9035e+06	6.82212e+06	-2.2					6.45072e+06	5.99967e+06	6.45092e+06	6.0002e+06	63.897	6.45072e+06	5.99967e+06	-11.937
6.90308e+06	6.82173e+06	6.90408e+06	6.82284e+06	14.8					6.45072e+06	5.99967e+06	6.45094e+06	5.99992e+06	12.466	6.45072e+06	5.99967e+06	-1.9601
6.90308e+06	6.82173e+06	6.90428e+06	6.82302e+06	11.8					6.45072e+06	5.99967e+06	6.45106e+06	6e+06	-0.52636	6.45167e+06	6.00036e+06	-36.025
6.90308e+06	6.82173e+06	6.90314e+06	6.82193e+06	75.8					6.45072e+06	5.99967e+06	6.45084e+06	5.99995e+06	58.217	6.45167e+06	5.99967e+06	3.8773
6.90308e+06	6.82173e+06	6.90377e+06	6.82236e+06	-4.2					6.45072e+06	5.99967e+06	6.45172e+06	6.00084e+06	16.052	6.45159e+06	6.00053e+06	0.1555
6.90308e+06	6.82173e+06	6.9038e+06	6.82248e+06	9.8					6.45072e+06	5.99967e+06	6.45217e+06	6.00094e+06	-12.821	6.45125e+06	6.00018e+06	-2.8033
6.90308e+06	6.82173e+06	6.90366e+06	6.82233e+06	8.2319					6.45072e+06	5.99967e+06	6.4508e+06	5.99977e+06	14.253	6.45161e+06	6.00046e+06	-10.967
6.90308e+06	6.82173e+06	6.90348e+06	6.82214e+06	6.3161					6.45072e+06	5.99967e+06	6.45128e+06	6.00028e+06	10.88	6.45124e+06	6.00018e+06	-0.1618
6.90308e+06	6.82173e+06	6.90386e+06	6.82259e+06	14.743					6.45072e+06	5.99967e+06	6.45102e+06	5.99993e+06	-16.081	6.45138e+06	6.00046e+06	18.042
6.90308e+06	6.82173e+06	6.90338e+06	6.82201e+06	0.77889					6.45072e+06	5.99967e+06	6.45165e+06	6.00074e+06	14.274	6.4511e+06	6.00001e+06	-9.764
6.90308e+06	6.82173e+06	6.90335e+06	6.82197e+06	-7.7663					6.45072e+06	5.99967e+06	6.4516e+06	6.00057e+06	2.9687	6.45111e+06	6.00015e+06	21.643
6.90308e+06	6.82173e+06	6.90341e+06	6.82216e+06	29.749					6.45072e+06	5.99967e+06	6.45111e+06	6.00029e+06	39.456	6.45157e+06	6.00053e+06	2.4995
6.90308e+06	6.82173e+06	6.90423e+06	6.82284e+06	1.6328					6.45072e+06	5.99967e+06	6.45113e+06	6.00027e+06	33.742	6.45136e+06	6.00011e+06	-43.934
6.90308e+06	6.82173e+06	6.90383e+06	6.82262e+06	20.175					6.45072e+06	5.99967e+06	6.45138e+06	6.00057e+06	27.77	6.45117e+06	6.00024e+06	3.8927
6.90308e+06	6.82173e+06	6.90332e+06	6.8221e+06	39.132					6.45072e+06	5.99967e+06	6.45107e+06	6.00005e+06	9.4207	6.45147e+06	6.00057e+06	18.914
6.90308e+06	6.82173e+06	6.90334e+06	6.82202e+06	14.938					6.45072e+06	5.99967e+06	6.45127e+06	6.00039e+06	25.559	6.45072e+06	5.99967e+06	-0.9567
6.90308e+06	6.82173e+06	6.90389e+06	6.82261e+06	13.198					6.45072e+06	5.99967e+06	6.45141e+06	6.00049e+06	16.642
6.90308e+06	6.82173e+06	6.90373e+06	6.82249e+06	19.447					6.45072e+06	5.99967e+06	6.45072e+06	5.99967e+06	1.5215
6.90308e+06	6.82173e+06	6.90325e+06	6.82192e+06	16.806					6.45072e+06	5.99967e+06	6.45128e+06	6.00022e+06	-0.9109
6.90308e+06	6.82173e+06	6.90345e+06	6.82223e+06	29.892					6.45072e+06	5.99967e+06	6.45072e+06	5.99967e+06	-7.7886
6.90308e+06	6.82173e+06	6.90312e+06	6.82181e+06	58.941					6.45072e+06	5.99967e+06	6.45072e+06	5.99967e+06	23.881
6.90308e+06	6.82173e+06	6.90319e+06	6.82186e+06	20.089					6.45072e+06	5.99967e+06	6.45111e+06	6.00041e+06	48.5
6.90308e+06	6.82173e+06	6.90344e+06	6.82207e+06	-0.5354					6.45072e+06	5.99967e+06	6.45151e+06	5.99967e+06	28.259
6.90308e+06	6.82173e+06	6.90359e+06	6.82226e+06	10.026					6.45072e+06	5.99967e+06	6.45072e+06	5.99967e+06	3.9812
6.90308e+06	6.82173e+06	6.90336e+06	6.82207e+06	22.759
6.90308e+06	6.82173e+06	6.90327e+06	6.82195e+06	20.681
6.90308e+06	6.82173e+06	6.90311e+06	6.82177e+06	34.26
6.90308e+06	6.82173e+06	6.90335e+06	6.82214e+06	39.435
6.90308e+06	6.82173e+06	6.90311e+06	6.82178e+06	37.817
6.90308e+06	6.82173e+06	6.90348e+06	6.82208e+06	-8.6947
6.90308e+06	6.82173e+06	6.9035e+06	6.82214e+06	5.036
6.90308e+06	6.82173e+06	6.90311e+06	6.82189e+06	88.048
6.90308e+06	6.82173e+06	6.90322e+06	6.82198e+06	48.718
6.90308e+06	6.82173e+06	6.90325e+06	6.82197e+06	36.911
6.90308e+06	6.82173e+06	6.90314e+06	6.82185e+06	59.746
6.90308e+06	6.82173e+06	6.90342e+06	6.82206e+06	2.1597
6.90308e+06	6.82173e+06	6.90358e+06	6.82198e+06	-88.639
6.90308e+06	6.82173e+06	6.90377e+06	6.82224e+06	-28.947

## Sheet: Experiment2
pair: Spc72-mTUR Bfa1-EYFP									pair: Spc72-mTUR Bfa1-EYFP
condition: Gal1-CDC20, signals at the daughter SPB									condition: Gal1-clb2DDB oe
P=0,003									P=0,003
FL(bg)bb	FL(bg)ab	FL(D)bb	FL(D)ab	FRET (D) %	FL(DA)bb	FL(DA)ab	FRET(DA) %		FL(bg)bb	FL(bg)ab	FL(D)bb	FL(D)ab	FRET (D) %	FL(DA)bb	FL(DA)ab	FRET(DA) %
6.41561e+06	6.36363e+06	6.41649e+06	6.36438e+06	-16.278	6.36494e+06	5.03127e+06	12		5.86861e+06	5.72115e+06	5.86905e+06	5.72154e+06	-2.135	5.72148e+06	5.72152e+06	20.495
6.41561e+06	6.36363e+06	6.41644e+06	6.36442e+06	-3.354	6.36514e+06	5.03119e+06	24		5.86861e+06	5.72115e+06	5.86903e+06	5.72153e+06	-0.881	5.72213e+06	5.72222e+06	18.2768
6.41561e+06	6.36363e+06	6.41612e+06	6.36427e+06	21.973	6.36482e+06	5.02972e+06	22		5.86861e+06	5.72115e+06	5.86928e+06	5.72173e+06	-5.244	5.72199e+06	5.722e+06	11.4088
6.41561e+06	6.36363e+06	6.41708e+06	6.36508e+06	0.8401	6.36442e+06	5.03018e+06	-18		5.86861e+06	5.72115e+06	5.86927e+06	5.72204e+06	36.679	5.7215e+06	5.72148e+06	4.2447
6.41561e+06	6.36363e+06	6.41667e+06	6.36473e+06	5.1588	6.36397e+06	5.03137e+06	43		5.86861e+06	5.72115e+06	5.86932e+06	5.72169e+06	-20.89	5.72138e+06	5.72135e+06	-2.192
6.41561e+06	6.36363e+06	6.41611e+06	6.36433e+06	29.767	6.36401e+06	5.03088e+06	-28		5.86861e+06	5.72115e+06	5.86932e+06	5.7218e+06	0.8841	5.72153e+06	5.72156e+06	18.7104
6.41561e+06	6.36363e+06	6.41755e+06	6.36578e+06	11.4021	6.36389e+06	5.03091e+06	-2		5.86861e+06	5.72115e+06	5.86929e+06	5.72178e+06	2.01	5.72145e+06	5.72153e+06	31.099
6.41561e+06	6.36363e+06	6.41742e+06	6.36519e+06	-14.789	6.36387e+06	5.03048e+06	36		5.86861e+06	5.72115e+06	5.86935e+06	5.72183e+06	2.01	5.72191e+06	5.72202e+06	23.01
6.41561e+06	6.36363e+06	6.41677e+06	6.36444e+06	-40.623	6.36383e+06	5.03038e+06	-22		5.86861e+06	5.72115e+06	5.86896e+06	5.72154e+06	20.01	5.72221e+06	5.72209e+06	-1.99
6.41561e+06	6.36363e+06	6.41649e+06	6.36463e+06	14.445	6.36432e+06	5.03038e+06	20		5.86861e+06	5.72115e+06	5.86893e+06	5.72142e+06	-4.99	5.72198e+06	5.72207e+06	20.01
6.41561e+06	6.36363e+06	6.41603e+06	6.36391e+06	-49.893	6.3643e+06	5.03019e+06	8		5.86861e+06	5.72115e+06	5.86961e+06	5.72201e+06	-4.99	5.72162e+06	5.72174e+06	31.01
6.41561e+06	6.36363e+06	6.41708e+06	6.36498e+06	-7.2835	6.36384e+06	5.03058e+06	38		5.86861e+06	5.72115e+06	5.86926e+06	5.72173e+06	-0.99	5.72227e+06	5.72223e+06	6.01
6.41561e+06	6.36363e+06	6.41682e+06	6.36458e+06	-26.002	6.36396e+06	5.03063e+06	45		5.86861e+06	5.72115e+06	5.86954e+06	5.72203e+06	5.01	5.72218e+06	5.72234e+06	23.01
6.41561e+06	6.36363e+06	6.41568e+06	6.36369e+06	-20.021	6.36396e+06	5.03067e+06	16		5.86861e+06	5.72115e+06	5.86941e+06	5.72192e+06	7.01	5.72228e+06	5.72228e+06	9.4738
6.41561e+06	6.36363e+06	6.41697e+06	6.36488e+06	-6.4404	6.36417e+06	5.03014e+06	11		5.86861e+06	5.72115e+06	5.86873e+06	5.72135e+06	52.01	5.72213e+06	5.72241e+06	32.32
6.41561e+06	6.36363e+06	6.41668e+06	6.3647e+06	2	6.3645e+06	5.03022e+06	1		5.86861e+06	5.72115e+06	5.86936e+06	5.72183e+06	1.01	5.72253e+06	5.7225e+06	7.0997
6.41561e+06	6.36363e+06	6.41658e+06	6.36444e+06	-18	6.3643e+06	5.03029e+06	21		5.86861e+06	5.72115e+06	5.86897e+06	5.72138e+06	-45.99	5.72198e+06	5.72199e+06	11.01
6.41561e+06	6.36363e+06	6.4177e+06	6.36573e+06	2	6.36388e+06	5.03112e+06	10		5.86861e+06	5.72115e+06	5.86903e+06	5.72144e+06	-33.99	5.72154e+06	5.72155e+06	12.01
6.41561e+06	6.36363e+06	6.41696e+06	6.36525e+06	19	6.36484e+06	5.02994e+06	23		5.86861e+06	5.72115e+06	5.86889e+06	5.72134e+06	-40.99	5.72154e+06	5.7217e+06	40.01
6.41561e+06	6.36363e+06	6.41592e+06	6.36414e+06	41	6.36455e+06	5.03035e+06	22		5.86861e+06	5.72115e+06	5.86928e+06	5.72181e+06	9.01	5.72152e+06	5.72164e+06	35.01
6.41561e+06	6.36363e+06	6.4172e+06	6.36519e+06	0	6.36423e+06	5.02991e+06	-9
6.41561e+06	6.36363e+06	6.41817e+06	6.36633e+06	7	6.36487e+06	5.031e+06	2
6.41561e+06	6.36363e+06	6.41685e+06	6.36475e+06	-9	6.36482e+06	5.03046e+06	4
6.41561e+06	6.36363e+06	6.41688e+06	6.36487e+06	0	6.36458e+06	5.03312e+06	-19
6.41561e+06	6.36363e+06	6.41776e+06	6.36551e+06	-13	6.36406e+06	5.03185e+06	24
6.41561e+06	6.36363e+06				6.36413e+06	5.03068e+06	16
6.41561e+06	6.36363e+06				6.36425e+06	5.03104e+06	36
6.41561e+06	6.36363e+06				6.36427e+06	5.03099e+06	14
6.41561e+06	6.36363e+06				6.36434e+06	5.03021e+06	15
6.41561e+06	6.36363e+06				6.36482e+06	5.03142e+06	18
6.41561e+06	6.36363e+06				6.36379e+06	5.03065e+06	71
