# Supplementary material for: A FRET-based study reveals site-specific regulation of spindle position checkpoint proteins at yeast centrosomes
Source: eLife. 2016 May 9;5:e14029. doi: 10.7554/eLife.14029 (PMC4878874; doi:10.7554/eLife.14029)
Supplement: Figure 2—figure supplement 1—source data 3. — DOI: http://dx.doi.org/10.7554/eLife.14029.016 [file elife-14029-fig2-figsupp1-data3.xls]

## Sheet: Description
Description:
List of Abbreviations
Raw Mean Fluoresence Intensity before bleach (Donor/Aceptor): FL (DA) bb
Raw Mean Fluoresence Intensity before bleach (Donor only): FL (D) bb
Raw Mean Fluoresence Intensity before bleach (Background): FL (bg) bb
Raw Mean Fluoresence Intensity after bleach (Donor/Aceptor): FL (DA) ab
Raw Mean Fluoresence Intensity after bleach (Donor only): FL (D) ab
RawMean Fluoresence Intensity after bleach (Background): FL (bg) ab
Calculated FRET efficiency % for the indicated Donor/Acceptor pai) : FRET % (DA)
Calculated FRET efficiency % background for Donor only sample : FRET % (D)

## Sheet: Experiment1 
pair: mTUR-Bub2 Nud1-EYFP									pair: mTUR-Bub2 Spc72-EYFP
condition: cycling cells									condition: cycling cells
P=0,58									P=0,84
FL(bg)bb	FL(bg)ab	FL(D)bb	FL(D)ab	FRET (D) %	FL(DA)bb	FL(DA)ab	FRET(DA) %		FL(bg)bb	FL(bg)ab	FL(D)bb	FL(D)ab	FRET (D) %	FL(DA)bb	FL(DA)ab	FRET(DA) %
5.87194e+06	5.88636e+06	7937127	7984447	20.6185	7.09381e+06	6896829	-0.444178		5.58892e+06	5.53885e+06	5.59064e+06	5.54049e+06	2.7621	5.5406e+06	5.54057e+06	5.9034
5.87194e+06	5.88636e+06	8357191	7905936	-4.00764	8.27323e+06	8109628	11.6915		5.58892e+06	5.53885e+06	5.5904e+06	5.54003e+06	-17.749	5.53997e+06	5.54e+06	10.2739
5.87194e+06	5.88636e+06	6532106	6656468	33.3271	7.12638e+06	7000429	7.74424		5.58892e+06	5.53885e+06	5.58919e+06	5.53912e+06	5.5399	5.54041e+06	5.54038e+06	6.2438
5.87194e+06	5.88636e+06	8147425	8090319	15.805	7.65981e+06	7390314	1.13072		5.58892e+06	5.53885e+06	5.59023e+06	5.54033e+06	18.64	5.54052e+06	5.54051e+06	7.79816
5.87194e+06	5.88636e+06	6850319	6550000	-28.3747	6.82047e+06	6585000	-14.6538		5.58892e+06	5.53885e+06	5.59004e+06	5.53982e+06	-8.306	5.54073e+06	5.54089e+06	15.8681
5.87194e+06	5.88636e+06	7317702	7296617	16.5329	6.45816e+06	6295700	-20.6368		5.58892e+06	5.53885e+06	5.59031e+06	5.5404e+06	18.121	5.54013e+06	5.53997e+06	-6.244
5.87194e+06	5.88636e+06	7196276	6964362	-3.80019	7.43353e+06	7225986	3.55763		5.58892e+06	5.53885e+06	5.59027e+06	5.54011e+06	-0.0016	5.54002e+06	5.53982e+06	-12.808
5.87194e+06	5.88636e+06	8147425	8090319	15.805	7.7292e+06	8070072	34.6599		5.58892e+06	5.53885e+06	5.58988e+06	5.53962e+06	-17.184	5.54043e+06	5.54062e+06	18.857
5.87194e+06	5.88636e+06	6934532	6705319	-10.698	6.95027e+06	6588159	-32.5469		5.58892e+06	5.53885e+06	5.58983e+06	5.53991e+06	21.268	5.54015e+06	5.53998e+06	-6.915
5.87194e+06	5.88636e+06	7141085	7078958	12.6321	5.99747e+06	5961043	-29.7233		5.58892e+06	5.53885e+06	5.58982e+06	5.53974e+06	5.6764	5.53978e+06	5.53962e+06	-13.006
5.87194e+06	5.88636e+06	6507362	6475021	11.1077	7.7837e+06	7501638	1.58776		5.58892e+06	5.53885e+06	5.58949e+06	5.53931e+06	-19.439	5.54053e+06	5.54039e+06	-1.5692
5.87194e+06	5.88636e+06	8043362	7855745	8.79152	7.68189e+06	7520841	9.19678		5.58892e+06	5.53885e+06	5.59011e+06	5.53991e+06	-5.09	5.54015e+06	5.54008e+06	2.1008
5.87194e+06	5.88636e+06	8536979	8118106	-0.364603	6.01237e+06	6015753	21.6649		5.58892e+06	5.53885e+06	5.59043e+06	5.54039e+06	9.5063	5.5399e+06	5.53975e+06	-9.123
5.87194e+06	5.88636e+06	8254830	7974809	4.95184	6.74172e+06	6662565	8.85282		5.58892e+06	5.53885e+06	5.58959e+06	5.53968e+06	26.132	5.53968e+06	5.53955e+06	-10.373
5.87194e+06	5.88636e+06	8413553	7979575	-2.37109	6.8923e+06	6684362	-7.00674		5.58892e+06	5.53885e+06	5.58973e+06	5.53965e+06	5.3781	5.54038e+06	5.54023e+06	-3.001
5.87194e+06	5.88636e+06	8187809	8077809	13.3728	8.31322e+06	7858125	-4.03077		5.58892e+06	5.53885e+06	5.59122e+06	5.54109e+06	4.8553	5.54053e+06	5.54035e+06	-4.03
5.87194e+06	5.88636e+06	7946868	7705547	4.99246	6.41307e+06	6304827	-6.81544		5.58892e+06	5.53885e+06	5.59043e+06	5.54026e+06	-0.0356	5.54058e+06	5.54051e+06	3.97
5.87194e+06	5.88636e+06	7961717	7647019	0.357587	7.93893e+06	7810843	12.3945		5.58892e+06	5.53885e+06	5.59093e+06	5.54104e+06	15.5433	5.54035e+06	5.54018e+06	-5.03
5.87194e+06	5.88636e+06	8326604	7772698	-11.0781	6.49488e+06	6393957	-0.833018		5.58892e+06	5.53885e+06	5.58979e+06	5.53956e+06	-15.312	5.5406e+06	5.54072e+06	14.97
5.87194e+06	5.88636e+06	6638881	6549881	3.46469	6.47963e+06	6305372	-22.5366		5.58892e+06	5.53885e+06	5.59012e+06	5.53997e+06	0.0633	5.54114e+06	5.54082e+06	-9.03
5.87194e+06	5.88636e+06	6824000	6791254	13.8385	7.23147e+06	6945886	-7.90378		5.58892e+06	5.53885e+06	5.59048e+06	5.54021e+06	-7.36	5.54021e+06	5.54028e+06	12.97
5.87194e+06	5.88636e+06	7016864	6585068	-44.8115	6.48087e+06	6261843	-39.2813		5.58892e+06	5.53885e+06	5.59101e+06	5.54068e+06	-7.124	5.53986e+06	5.53985e+06	6.97
5.87194e+06	5.88636e+06	8129593	7768356	-0.910117	7.40988e+06	7175476	0.866867		5.58892e+06	5.53885e+06	5.59145e+06	5.54106e+06	-6.944	5.5397e+06	5.53975e+06	12.97
5.87194e+06	5.88636e+06	7391021	7103898	-5.71591	6.92008e+06	6920974	19.1365		5.58892e+06	5.53885e+06	5.59056e+06	5.54046e+06	5.6016	5.54112e+06	5.54101e+06	3.2416
5.87194e+06	5.88636e+06	7144735	7275653	27.4359	8.11215e+06	7882019	7.51852		5.58892e+06	5.53885e+06	5.59114e+06	5.54108e+06	7.97455	5.53966e+06	5.53956e+06	-6.367
5.87194e+06	5.88636e+06	8044254	8022509	17.3574	6.96812e+06	7009897	22.7686		5.58892e+06	5.53885e+06	5.59097e+06	5.54058e+06	-10.797	5.54066e+06	5.5407e+06	10.3805
5.87194e+06	5.88636e+06	6982527	6809364	-1.27219	6.24831e+06	6364680	43.3788		5.58892e+06	5.53885e+06	5.59019e+06	5.54001e+06	-2.066	5.53967e+06	5.53949e+06	-20.549
5.87194e+06	5.88636e+06	7599545	7328854	-0.714561	7.18235e+06	7045782	7.2712		5.58892e+06	5.53885e+06	5.5903e+06	5.54006e+06	-6.564	5.53906e+06	5.53902e+06	-22.229
5.87194e+06	5.88636e+06	7645236	7232400	-12.691	8.90607e+06	8010204	-23.1314		5.58892e+06	5.53885e+06	5.59045e+06	5.54016e+06	-9.793	5.54041e+06	5.54009e+06	-18.654
5.87194e+06	5.88636e+06	7160182	6798673	-22.1551	8.18611e+06	7298223	-43.8375		5.58892e+06	5.53885e+06				5.54052e+06	5.54059e+06	11.8434
5.87194e+06	5.88636e+06	6759636	6622964	-1.46083	8.38675e+06	7552689	-31.0038		5.58892e+06	5.53885e+06				5.54106e+06	5.54094e+06	2.1334
5.87194e+06	5.88636e+06	7165455	6836746	-17.0532	6.20153e+06	6089172	-36.3506		5.58892e+06	5.53885e+06				5.54043e+06	5.54039e+06	5.2926
5.87194e+06	5.88636e+06				6.75883e+06	6678879	8.96229		5.58892e+06	5.53885e+06				5.54109e+06	5.54096e+06	2.0916
5.87194e+06	5.88636e+06				7.39217e+06	7255500	9.06775		5.58892e+06	5.53885e+06				5.54098e+06	5.54062e+06	-12.59
5.87194e+06	5.88636e+06				7.11008e+06	6923517	1.06172		5.58892e+06	5.53885e+06				5.53991e+06	5.53988e+06	5.5911
5.87194e+06	5.88636e+06				7.7544e+06	7441241	-1.09004		5.58892e+06	5.53885e+06				5.54028e+06	5.54043e+06	17.0821
5.87194e+06	5.88636e+06				6.52414e+06	6622828	32.4506		5.58892e+06	5.53885e+06				5.53991e+06	5.53966e+06	-22.504
5.87194e+06	5.88636e+06				7.73021e+06	7806604	23.0286		5.58892e+06	5.53885e+06				5.54087e+06	5.54114e+06	19.857
									5.58892e+06	5.53885e+06				5.53939e+06	5.53952e+06	26.814
									5.58892e+06	5.53885e+06				5.54021e+06	5.5401e+06	-0.8891
									5.58892e+06	5.53885e+06				5.54062e+06	5.54061e+06	7.17896
									5.58892e+06	5.53885e+06				5.54031e+06	5.54018e+06	-2.04

## Sheet: quantif.2
pair: mTUR-Bub2 Nud1-EYFP									pair: mTUR-Bub2 Spc72-EYFP
condition: cycling cells									condition: cycling cells
P=0,46									P=0,54
FL(bg)bb	FL(bg)ab	FL(D)bb	FL(D)ab	FRET (D) %	FL(DA)bb	FL(DA)ab	FRET(DA) %		FL(bg)bb	FL(bg)ab	FL(D)bb	FL(D)ab	FRET (D) %	FL(DA)bb	FL(DA)ab	FRET(DA) %
5944.56	5827.33	6424	6323	3.27281	6968	6703	-16.876		5785.77	5716.38	5961	5877	-9.09962	6747	6828	13.5285
5944.56	5827.33	7073	6887	-6.49051	6507	6418	4.77803		5785.77	5716.38	7066	6986	-0.83611	8010	7872	-3.1831
5944.56	5827.33	6705	6550	-5.22755	6313	6176	-5.6724		5785.77	5716.38	7318	7149	-6.95339	8677	8612	0.151423
5944.56	5827.33	6923	6858	5.06684	6955	6933	8.6122		5785.77	5716.38	7011	6792	-13.9097	6157	6059	-8.35204
5944.56	5827.33	6670	6461	-14.4836	7162	7085	3.19816		5785.77	5716.38	7221	7080	-5.25188	6880	6920	9.088
5944.56	5827.33	7267	7157	0.54316	7347	7267	2.58548		5785.77	5716.38	7076	6968	-3.08524	6870	6845	3.93266
5944.56	5827.33	6190	6017	-29.4083	6271	6063	-38.5196		5785.77	5716.38	5871	5825	21.5297	7410	7382	2.48464
5944.56	5827.33	6509	6280	-24.6932	7170	7078	2.0167		5785.77	5716.38	6980	6789	-11.3382	6946	6763	-10.8555
5944.56	5827.33	6346	6215	-3.55403	6620	6520	2.48637		5785.77	5716.38	6297	6272	7.98837	7397	7341	0.823864
5944.56	5827.33	6981	6861	-0.268731	6613	6344	-29.3763		5785.77	5716.38	6494	6415	-1.37635	6944	6982	8.48477
5944.56	5827.33	6282	6137	-8.97022	7090	7070	7.82368		5785.77	5716.38	6353	6232	-10.0104	6102	6011	-7.33681
5944.56	5827.33	7832	7687	-1.4937	6397	6221	-14.9308		5785.77	5716.38	6629	6520	-4.92964	6836	6626	-15.4588
5944.56	5827.33	6732	6427	-31.3137	7706	7540	-2.84806		5785.77	5716.38	6860	6754	-3.5288	6879	6654	-16.5969
5944.56	5827.33	7372	7201	-3.91491	7228	7034	-6.3628		5785.77	5716.38	6681	6496	-14.8298	7082	6821	-17.3468
5944.56	5827.33	6756	6760	12.9974	7194	6888	-17.798		5785.77	5716.38	5817	5759	26.7148	6677	6556	-6.1475
5944.56	5827.33	7001	6885	0.115558	6885	6667	-12.0021		5785.77	5716.38	7001	6885	-3.98894	8995	8984	1.78677
5944.56	5827.33	8123	7735	-14.1942	7120	7082	6.3142		5785.77	5716.38	7016	6918	-2.38141	6779	6653	-6.04468
5944.56	5827.33	6974	6872	1.45714	7644	7375	-9.80688		5785.77	5716.38	6913	6774	-6.5823	7585	7322	-12.0586
5944.56	5827.33	6639	6459	-9.93843	7006	6698	-21.9117		5785.77	5716.38	7085	6846	-15.0153	7877	7636	-8.94009
5944.56	5827.33	6303	6236	12.2893	7055	6937	-0.0700911		5785.77	5716.38	7798	7694	-1.75036	8055	8012	1.14935
5944.56	5827.33	6752	6651	1.96951	6364	6221	-6.54812		5785.77	5716.38	7147	6959	-9.54562	8719	8600	-1.7206
5944.56	5827.33	7589	7559	5.03689	8139	7590	-24.4957		5785.77	5716.38	7085	7115	7.10593	7709	7562	-4.20539
5944.56	5827.33	7227	7095	-1.16575	7007	6762	-13.6709		5785.77	5716.38	6330	6396	19.9208	7673	7560	-2.36575
5944.56	5827.33	6524	6422	2.55979	6825	6915	19.052		5785.77	5716.38	7121	7080	2.08157	7930	7639	-11.5268
5944.56	5827.33	6718	6550	-7.02645	6621	6398	-18.5358		5785.77	5716.38	6378	6226	-16.2113	7369	7407	6.35181
5944.56	5827.33	6635	6422	-16.1061	6748	6631	0.027651		5785.77	5716.38	7218	7147	-0.112915	7820	7795	2.1353
5944.56	5827.33	6590	6472	-0.120648	6686	6474	-14.6564		5785.77	5716.38	6825	6740	-1.52551	8202	8202	2.79145
5944.56	5827.33	6680	6522	-5.87012	6169	6008	-24.2312		5785.77	5716.38	6332	6224	-7.60721	7736	7647	-1.01602
5944.56	5827.33	6398	6298	3.65911	7414	7135	-12.3715		5785.77	5716.38	7024	6802	-14.058	6680	6555	-6.63181
5944.56	5827.33	6654	6394	-25.1961	6666	6487	-9.365		5785.77	5716.38	7151	6978	-8.21291	7037	6827	-12.661
5944.56	5827.33	7430	7256	-3.97418	6282	6163	-0.529626		5785.77	5716.38	7022	7019	5.09626	6306	6220	-3.29922
5944.56	5827.33	6176	6070	4.62454	6674	6491	-9.91127		5785.77	5716.38	7852	7521	-14.497	6670	6674	7.66327
5944.56	5827.33	6227	6167	16.8466	7731	7483	-7.8988		5785.77	5716.38	8279	8109	-4.20525	6688	6604	-1.64659
5944.56	5827.33	7857	7607	-7.46082	6387	6238	-7.7381		5785.77	5716.38	6404	6397	9.16591	7235	7039	-9.57311
5944.56	5827.33	8898	8448	-12.6982	7026	6895	-1.29046		5785.77	5716.38	7907	7655	-9.41989	6018	5925	-11.3201
5944.56	5827.33	7908	7601	-10.6997	7758	7789	7.55593		5785.77	5716.38	7064	6810	-16.8812	5906	5809	-29.8173
5944.56	5827.33	7122	6968	-3.22424	6050	5921	-12.5741		5785.77	5716.38	6618	6458	-12.2186	5988	5903	-8.36768
5944.56	5827.33	6930	6769	-4.64897	6610	6406	-14.9962		5785.77	5716.38	6486	6352	-10.1658	5926	5768	-171.684
5944.56	5827.33	8209	7852	-11.8428	7283	7063	-8.3176		5785.77	5716.38	7844	7508	-14.8813	5976	5926	9.24771
5944.56	5827.33	7032	6757	-16.9714	6460	6409	11.3849		5785.77	5716.38				6976	6791	-10.7588
5944.56	5827.33	7180	7146	6.31109	6633	6710	22.004		5785.77	5716.38				8699	8760	4.28387
5944.56	5827.33				6791	6591	-10.8395		5785.77	5716.38				8692	8719	3.21002
5944.56	5827.33				7627	7416	-5.90292		5785.77	5716.38				9498	9460	0.83835
5944.56	5827.33				7731	7433	-11.2587		5785.77	5716.38				7083	7093	5.76665
5944.56	5827.33				6314	6114	-28.876		5785.77	5716.38				8170	8225	4.9583
5944.56	5827.33				6365	6297	10.4802		5785.77	5716.38				7571	7493	-0.484932
5944.56	5827.33				6059	5946	3.55805		5785.77	5716.38				9161	9027	-1.95176
5944.56	5827.33				6229	6040	-33.7513		5785.77	5716.38				9777	9480	-6.04779
5944.56	5827.33				7767	7550	-5.79205		5785.77	5716.38				7973	7739	-8.13874
5944.56	5827.33				6783	6594	-9.36232		5785.77	5716.38				8384	8280	-1.35026
5944.56	5827.33				6774	6728	7.90772		5785.77	5716.38				9479	9301	-3.03004
									5785.77	5716.38				8256	8021	-7.18625
									5785.77	5716.38				7229	7041	-8.9547

## Sheet: quantif.3
pair: mTUR-Bub2 Nud1-EYFP									pair: mTUR-Bub2 Spc72-EYFP
condition: cycling cells									condition: cycling cells
P=0,73									P=0,26
FL(bg)bb	FL(bg)ab	FL(D)bb	FL(D)ab	FRET (D) %	FL(DA)bb	FL(DA)ab	FRET(DA) %		FL(bg)bb	FL(bg)ab	FL(D)bb	FL(D)ab	FRET (D) %	FL(DA)bb	FL(DA)ab	FRET(DA) %
6010.9	5906.1	6134	6014	-14.0871	6981	6845	-3.32304		5569.54	5515.38	6768	6714	0.0128353	8304	8219	-1.14092
6010.9	5906.1	6398	6256	-10.6316	6867	6790	3.14515		5569.54	5515.38	7083	6998	-2.08052	7942	7870	-0.757922
6010.9	5906.1	6361	6180	-27.8204	6800	6650	-6.07609		5569.54	5515.38	5965	5896	-3.90057	8192	8079	-2.29544
6010.9	5906.1	7190	6999	-7.88727	7695	7646	3.20708		5569.54	5515.38	6408	6261	-12.4523	7901	7983	5.51763
6010.9	5906.1	6583	6472	-1.0956	6545	6425	-2.92927		5569.54	5515.38	7274	7373	8.24465	8210	8090	-2.55751
6010.9	5906.1	6417	6239	-21.9886	6935	6718	-13.8194		5569.54	5515.38	7172	6909	-14.9859	7582	7631	4.87583
6010.9	5906.1	6700	6526	-11.1631	7020	6986	6.55616		5569.54	5515.38	6501	6408	-4.35195	6615	6571	0.961889
6010.9	5906.1	6151	6090	23.8173	6848	6664	-10.4499		5569.54	5515.38	6050	5956	-9.0433	7675	7573	-2.32532
6010.9	5906.1	6617	6681	21.7835	6972	6739	-15.392		5569.54	5515.38	7563	7253	-14.724	7424	7281	-5.03202
6010.9	5906.1	6362	6284	7.09182	6659	6493	-10.4277		5569.54	5515.38	6705	6570	-7.66594	8421	8480	3.81681
6010.9	5906.1	6412	6217	-29.0125	6443	6340	0.414842		5569.54	5515.38	6294	6206	-4.90087	7897	7934	3.76884
6010.9	5906.1	6952	6786	-6.95534	6467	6320	-10.1957		5569.54	5515.38	7844	7648	-6.65128	7442	7307	-4.51247
6010.9	5906.1	6555	6419	-6.08306	6596	6495	0.645271		5569.54	5515.38	6526	6432	-4.3471	7501	7410	-1.94478
6010.9	5906.1	6169	6045	-13.8229	7192.36	7062.72	-2.14818		5569.54	5515.38	7956	7903	0.0483263	6751	6672	-2.14818
6010.9	5906.1	6546	6458	3.04403	6881	6727	-5.99342		5569.54	5515.38	8375	7902	-17.5498	8255	7994	-8.34523
6010.9	5906.1	6951	6898	5.2223	7809	7632	-4.18332		5569.54	5515.38	6935	6919	2.71826	8020	7817	-6.46703
6010.9	5906.1	7097	6953	-3.74439	7076	6702	-33.8233		5569.54	5515.38	5891	5826	-3.49183	7826	7799	1.18907
6010.9	5906.1	8219	7890	-11.301	6803	6777	9.04811		5569.54	5515.38	6109	6018	-7.33088	7263	7128	-5.01336
6010.9	5906.1	8511	8130	-12.4196	6937	6723	-13.3676		5569.54	5515.38	6915	6880	1.40361	7315	7475	10.9284
6010.9	5906.1	6135	6003	-28.0702	6932	6658	-22.503		5569.54	5515.38	8593	8179	-13.5097	9177	9100	-0.637339
6010.9	5906.1	7853	7520	-14.1397	7206	6947	-14.8141		5569.54	5515.38	6162	6128	3.2898	8137	8050	-1.2959
6010.9	5906.1	7501	7146	-20.179	6548	6414	-5.74916		5569.54	5515.38	7216	7093	-4.36394	7532	7309	-9.41373
6010.9	5906.1	9535	9130	-9.3117	7018	6676	-30.8092		5569.54	5515.38	7151	6923	-12.3504	7773	7671	-2.21961
6010.9	5906.1	7761	7512	-8.97939	6943	6739	-11.9102		5569.54	5515.38	7790	7578	-7.65272	7977	8110	7.21316
6010.9	5906.1	7703	7546	-3.18312	6740	6614	-2.99477		5569.54	5515.38	5754	5718	8.95976	6956	6794	-8.4346
6010.9	5906.1	6435	6332	0.422634	7255	7205	4.21895		5569.54	5515.38	7440	7155	-14.0793	6539	6348	-16.4357
6010.9	5906.1	7523	7266	-11.192	7997	7755	-7.42063		5569.54	5515.38	6729	6590	-7.89549	7994	7703	-10.8267
6010.9	5906.1	7491	7262	-9.15997	6551	6440	-1.16127		5569.54	5515.38	6198	6131	-2.08672	6793	6539	-19.5236
6010.9	5906.1	7398	7377	5.69719	7344	6952	-27.4596		5569.54	5515.38	6443	6384	-0.557917	8463	8356	-1.86038
6010.9	5906.1	7688	7497	-5.41832	6910	6826	2.26112		5569.54	5515.38	7830	7688	-4.04334	8183	8026	-4.09645
6010.9	5906.1	9437	9115	-6.76867	6393	6311	5.63102		5569.54	5515.38	7424	7330	-2.19585	7993	8126	7.16896
6010.9	5906.1	8089	8025	1.92553	6638	6498	-5.94695		5569.54	5515.38	7543	7311	-9.90447	8613	8429	-4.45653
6010.9	5906.1				6682	6448	-23.842		5569.54	5515.38	5960	5972	14.4879	7591	7392	-7.71848
6010.9	5906.1				7052	6847	-10.6494		5569.54	5515.38	7959	7732	-7.79775	7003	6965	1.11435
6010.9	5906.1				6988	6827	-6.10273		5569.54	5515.38	6773	6783	5.06099	7345	7134	-9.69014
6010.9	5906.1				6904	6868	7.15251		5569.54	5515.38	7641	7378	-11.2125	7942	7813	-3.25756
6010.9	5906.1				7856	7529	-13.6915		5569.54	5515.38	7383	7344	0.828706	6423	6360	-1.04736
6010.9	5906.1				6708	6728	15.1843		5569.54	5515.38	8106	7952	-4.09774	9167	9287	4.61749
6010.9	5906.1				8322	7919	-14.8144		5569.54	5515.38				7975	7840	-3.47783
6010.9	5906.1				7588	7275	-15.2093		5569.54	5515.38				8326	8215	-2.10571
6010.9	5906.1				6570	6425	-7.74716		5569.54	5515.38				7723	7372	-15.9886
6010.9	5906.1				7106	6896	-10.6273		5569.54	5515.38				6963	6755	-12.4108
6010.9	5906.1				8149	7738	-16.7149		5569.54	5515.38				8328	8414	4.8352
6010.9	5906.1				7933	7645	-10.5354		5569.54	5515.38				7178	7161	2.25775
6010.9	5906.1				7003	6932	3.29467		5569.54	5515.38				7626	7578	0.298352
6010.9	5906.1				7700	7392	-13.6752		5569.54	5515.38				7447	7356	-2.00184
6010.9	5906.1				7910	7566	-14.4105		5569.54	5515.38				7498	7451	0.36959
6010.9	5906.1				8285	7840	-17.5914		5569.54	5515.38				7648	7725	5.9356
6010.9	5906.1				8172	7863	-10.4349		5569.54	5515.38				7286	7100	-8.32039
									5569.54	5515.38				7402	7414	3.48432
									5569.54	5515.38				8700	8051	-23.4596
									5569.54	5515.38				8019	7913	-2.1624
									5569.54	5515.38				7297	7068	-11.2614
									5569.54	5515.38				8328	8414	4.8352
