# Supplementary material for: A FRET-based study reveals site-specific regulation of spindle position checkpoint proteins at yeast centrosomes
Source: eLife. 2016 May 9;5:e14029. doi: 10.7554/eLife.14029 (PMC4878874; doi:10.7554/eLife.14029)
Supplement: Figure 2—figure supplement 1—source data 4. — DOI: http://dx.doi.org/10.7554/eLife.14029.017 [file elife-14029-fig2-figsupp1-data4.xls]

## Sheet: Description
Description:
List of Abbreviations
Raw Mean Fluoresence Intensity before bleach (Donor/Aceptor): FL (DA) bb
Raw Mean Fluoresence Intensity before bleach (Donor only): FL (D) bb
Raw Mean Fluoresence Intensity before bleach (Background): FL (bg) bb
Raw Mean Fluoresence Intensity after bleach (Donor/Aceptor): FL (DA) ab
Raw Mean Fluoresence Intensity after bleach (Donor only): FL (D) ab
RawMean Fluoresence Intensity after bleach (Background): FL (bg) ab
Calculated FRET efficiency % for the indicated Donor/Acceptor pai) : FRET % (DA)
Calculated FRET efficiency % background for Donor only sample : FRET % (D)

## Sheet: Experiment1 
pair: mTUR-Bub2 Bfa1-EYFP
condition: cycling cells
P=0,11*10¯⁹
FL(bg)bb	FL(bg)ab	FL(D)bb	FL(D)ab	FRET (D) %	FL(DA)bb	FL(DA)ab	FRET(DA) %
5.87194e+06	5.88636e+06	6.86824e+06	6.81793e+06	-5.22	7.73393e+06	7.97833e+06	16.8455
5.87194e+06	5.88636e+06	5.99997e+06	6.0423e+06	-5.808	7.07853e+06	7.59993e+06	31.469
5.87194e+06	5.88636e+06	5.80191e+06	5.86911e+06	-5.226	6.87683e+06	7.20933e+06	26.113
5.87194e+06	5.88636e+06	7.03644e+06	6.90313e+06	-10.231	6.23407e+06	6.36344e+06	21.402
5.87194e+06	5.88636e+06	6.64904e+06	6.88233e+06	15.201	7.73393e+06	7.97833e+06	16.8455
5.87194e+06	5.88636e+06	6.30788e+06	6.25377e+06	-14.449	6.55373e+06	6.79013e+06	24.867
5.87194e+06	5.88636e+06	6.41174e+06	6.63133e+06	15.7582	6.21935e+06	6.375e+06	24.079
5.87194e+06	5.88636e+06	6.85494e+06	6.86103e+06	-0.8355	7.40793e+06	7.74493e+06	21.874
5.87194e+06	5.88636e+06	7.28944e+06	7.74493e+06	21.874	7.21313e+06	7.47703e+06	20.212
5.87194e+06	5.88636e+06	7.09464e+06	7.47703e+06	20.212	6.11316e+06	6.11711e+06	7.75726
5.87194e+06	5.88636e+06	5.99467e+06	6.11711e+06	7.75726	6.71663e+06	6.78093e+06	12.0095
5.87194e+06	5.88636e+06	6.59814e+06	6.78093e+06	12.0095	6.96893e+06	7.35223e+06	27.366
5.87194e+06	5.88636e+06	6.85044e+06	7.35223e+06	27.366	6.004e+06	6.02814e+06	11.3722
5.87194e+06	5.88636e+06	5.88551e+06	6.02814e+06	11.3722	7.40793e+06	7.74493e+06	21.874
5.87194e+06	5.88636e+06	7.28944e+06	7.74493e+06	21.874	6.64253e+06	6.83983e+06	21.406
5.87194e+06	5.88636e+06	6.52404e+06	6.83983e+06	21.406	6.91403e+06	6.92243e+06	7.73021
5.87194e+06	5.88636e+06	7.42204e+06	7.27013e+06	-7.735	6.80423e+06	6.79213e+06	6.25208
5.87194e+06	5.88636e+06	6.09136e+06	6.03672e+06	-22.605	6.99693e+06	7.53083e+06	32.884
5.87194e+06	5.88636e+06	7.43494e+06	7.40013e+06	-0.7226	6.4455e+06	6.34588e+06	-4.023
5.87194e+06	5.88636e+06	6.49554e+06	6.64223e+06	9.532	6.16721e+06	6.26465e+06	19.195
5.87194e+06	5.88636e+06	5.92627e+06	6.00908e+06	0.7215	5.82554e+06	5.73504e+06	-25.159
5.87194e+06	5.88636e+06	6.75844e+06	6.66553e+06	-10.301	5.69761e+06	5.74561e+06	23.68
5.87194e+06	5.88636e+06	6.45804e+06	6.32939e+06	-21.108	6.96453e+06	7.61413e+06	37.248
5.87194e+06	5.88636e+06	6.13315e+06	6.23615e+06	5.1771	6.32526e+06	6.41953e+06	16.934
5.87194e+06	5.88636e+06	6.66984e+06	6.77903e+06	6.45079	6.42167e+06	6.56713e+06	20.236
5.87194e+06	5.88636e+06	6.39294e+06	6.53643e+06	9.4721	5.78815e+06	5.79281e+06	8.5409
5.87194e+06	5.88636e+06	6.88294e+06	6.95863e+06	4.3165	5.83679e+06	5.97284e+06	33.434
5.87194e+06	5.88636e+06	5.67428e+06	5.71404e+06	-23.236	7.57973e+06	7.70993e+06	12.9336
5.87194e+06	5.88636e+06	6.72384e+06	6.63893e+06	-10.027	6.37867e+06	6.40489e+06	9.9202
5.87194e+06	5.88636e+06	6.81194e+06	6.89043e+06	4.3706	5.89618e+06	6.00229e+06	26.55
5.87194e+06	5.88636e+06	6.75084e+06	6.82663e+06	4.048	6.56973e+06	6.77123e+06	22.466
5.87194e+06	5.88636e+06	6.33188e+06	6.32279e+06	-7.543	6.60653e+06	6.63903e+06	9.8982
5.87194e+06	5.88636e+06	6.48074e+06	6.4242e+06	-10.901	5.72404e+06	5.68582e+06	-9.397
5.87194e+06	5.88636e+06	6.49754e+06	6.70463e+06	14.2512	7.77333e+06	8.20743e+06	22.932
5.87194e+06	5.88636e+06	5.92442e+06	5.95289e+06	-10.922	6.81693e+06	7.05813e+06	22.205
5.87194e+06	5.88636e+06	6.29269e+06	6.26796e+06	-10.458	5.72179e+06	5.74671e+06	15.7027
5.87194e+06	5.88636e+06	6.51674e+06	6.50193e+06	-5.575	7.19653e+06	7.26893e+06	11.1503
5.87194e+06	5.88636e+06	5.8065e+06	5.79672e+06	-30.382	6.98863e+06	7.26033e+06	22.211
5.87194e+06	5.88636e+06	7.81974e+06	7.83613e+06	2.8705	7.39143e+06	7.53793e+06	14.1906
5.87194e+06	5.88636e+06	6.49754e+06	6.70463e+06	14.2512	5.60525e+06	5.67485e+06	38.821
5.87194e+06	5.88636e+06	6.66914e+06	6.64743e+06	-4.599	6.49353e+06	6.81233e+06	30.643
5.87194e+06	5.88636e+06	5.98269e+06	5.99032e+06	-13.549	7.31893e+06	7.64243e+06	21.948
5.87194e+06	5.88636e+06	6.83914e+06	6.82553e+06	-2.4797	6.52683e+06	6.53823e+06	8.2133
5.87194e+06	5.88636e+06	7.56694e+06	7.61943e+06	4.1096	5.79627e+06	5.7762e+06	0.9095
5.87194e+06	5.88636e+06	6.22028e+06	6.39562e+06	13.204	6.70293e+06	7.10463e+06	31.51
5.87194e+06	5.88636e+06	7.52774e+06	7.57213e+06	3.6582	6.76523e+06	7.06323e+06	25.688
5.87194e+06	5.88636e+06	6.44774e+06	6.37694e+06	-13.372	7.14993e+06	7.17973e+06	8.8887
5.87194e+06	5.88636e+06	7.15234e+06	7.00663e+06	-9.87	8.18323e+06	8.45463e+06	16.2058
5.87194e+06	5.88636e+06	6.28762e+06	6.36866e+06	3.0613	6.47703e+06	6.54973e+06	13.7973
5.87194e+06	5.88636e+06	6.09095e+06	6.17542e+06	2.4369	6.79013e+06	7.05883e+06	23.917
5.87194e+06	5.88636e+06	7.05874e+06	6.93273e+06	-9.386	5.81304e+06	5.76577e+06	-8.053
5.87194e+06	5.88636e+06	6.30614e+06	6.23146e+06	-17.718	5.66743e+06	5.80849e+06	47.069
5.87194e+06	5.88636e+06	7.13284e+06	6.96593e+06	-11.735	5.83143e+06	5.84551e+06	10.7649
5.87194e+06	5.88636e+06	7.77304e+06	7.98823e+06	10.9782	6.33205e+06	6.37877e+06	12.2171
5.87194e+06	5.88636e+06				5.54469e+06	5.54491e+06	7.40628

## Sheet: Experiment2
pair: mTUR-Bub2 Bfa1-EYFP
condition: cycling cells
P=0,22*10¯⁶
FL(bg)bb	FL(bg)ab	FL(D)bb	FL(D)ab	FRET (D) %	FL(DA)bb	FL(DA)ab	FRET(DA) %
5.58892e+06	5.53885e+06	5.59064e+06	5.54049e+06	-5.2079	5.59054e+06	5.54084e+06	18.019
5.58892e+06	5.53885e+06	5.5904e+06	5.54003e+06	-25.719	5.59134e+06	5.54118e+06	-4.203
5.58892e+06	5.53885e+06	5.58919e+06	5.53912e+06	-2.4301	5.59274e+06	5.54278e+06	2.632
5.58892e+06	5.53885e+06	5.59023e+06	5.54033e+06	10.67	5.59165e+06	5.54207e+06	14.957
5.58892e+06	5.53885e+06	5.59004e+06	5.53982e+06	-16.276	5.59122e+06	5.54122e+06	2.6961
5.58892e+06	5.53885e+06	5.59031e+06	5.5404e+06	10.151	5.59055e+06	5.5404e+06	-6.0163
5.58892e+06	5.53885e+06	5.59027e+06	5.54011e+06	-7.9716	5.59136e+06	5.54132e+06	1.0873
5.58892e+06	5.53885e+06	5.58988e+06	5.53962e+06	-25.154	5.59143e+06	5.54148e+06	4.2016
5.58892e+06	5.53885e+06	5.58983e+06	5.53991e+06	13.298	5.59086e+06	5.54062e+06	-10.158
5.58892e+06	5.53885e+06	5.58982e+06	5.53974e+06	-2.2936	5.5916e+06	5.5419e+06	12
5.58892e+06	5.53885e+06	5.58949e+06	5.53931e+06	-27.409	5.59025e+06	5.54021e+06	2
5.58892e+06	5.53885e+06	5.59011e+06	5.53991e+06	-13.06	5.59036e+06	5.54012e+06	-14
5.58892e+06	5.53885e+06	5.59043e+06	5.54039e+06	1.5363	5.5905e+06	5.54077e+06	17
5.58892e+06	5.53885e+06	5.58959e+06	5.53968e+06	18.162	5.5905e+06	5.54067e+06	12.502
5.58892e+06	5.53885e+06	5.58973e+06	5.53965e+06	-2.5919	5.59e+06	5.53995e+06	1.0517
5.58892e+06	5.53885e+06	5.59122e+06	5.54109e+06	-3.1147	5.59011e+06	5.54007e+06	1.9755
5.58892e+06	5.53885e+06	5.59043e+06	5.54026e+06	-8.0056	5.58988e+06	5.53996e+06	12.703
5.58892e+06	5.53885e+06	5.59093e+06	5.54104e+06	7.5733	5.58937e+06	5.53942e+06	20.277
5.58892e+06	5.53885e+06	5.58979e+06	5.53956e+06	-23.282	5.58946e+06	5.53972e+06	53.701
5.58892e+06	5.53885e+06	5.59012e+06	5.53997e+06	-7.9067	5.58969e+06	5.53989e+06	37.352
5.58892e+06	5.53885e+06	5.59048e+06	5.54021e+06	-15.33	5.58938e+06	5.53972e+06	24.925
5.58892e+06	5.53885e+06	5.59101e+06	5.54068e+06	-15.094	5.59157e+06	5.54178e+06	46.434
5.58892e+06	5.53885e+06	5.59145e+06	5.54106e+06	-14.914	5.59017e+06	5.54019e+06	9
5.58892e+06	5.53885e+06	5.59056e+06	5.54046e+06	-2.3684	5.59016e+06	5.54024e+06	7
5.58892e+06	5.53885e+06	5.59114e+06	5.54108e+06	0.0045464	5.59011e+06	5.54012e+06	10
5.58892e+06	5.53885e+06	5.59097e+06	5.54058e+06	-18.767	5.59145e+06	5.54171e+06	6
5.58892e+06	5.53885e+06	5.59019e+06	5.54001e+06	-10.036	5.59144e+06	5.54147e+06	11
5.58892e+06	5.53885e+06	5.5903e+06	5.54006e+06	-14.534	5.5903e+06	5.54033e+06	3
5.58892e+06	5.53885e+06	5.59045e+06	5.54016e+06	-17.763	5.59041e+06	5.54047e+06	6
5.58892e+06	5.53885e+06				5.59079e+06	5.54097e+06	8
5.58892e+06	5.53885e+06				5.59067e+06	5.54093e+06	11
5.58892e+06	5.53885e+06				5.5908e+06	5.54108e+06	16
5.58892e+06	5.53885e+06				5.59044e+06	5.54065e+06	15
5.58892e+06	5.53885e+06				5.59081e+06	5.5407e+06	15
5.58892e+06	5.53885e+06				5.59116e+06	5.54113e+06	-3
5.58892e+06	5.53885e+06				5.58956e+06	5.53973e+06	1
5.58892e+06	5.53885e+06				5.59102e+06	5.54109e+06	27
5.58892e+06	5.53885e+06				5.59119e+06	5.54102e+06	6
5.58892e+06	5.53885e+06				5.59086e+06	5.54104e+06	-5
5.58892e+06	5.53885e+06				5.59021e+06	5.54043e+06	11
5.58892e+06	5.53885e+06				5.59039e+06	5.54043e+06	18
5.58892e+06	5.53885e+06				5.59039e+06	5.54043e+06	7
5.58892e+06	5.53885e+06				5.59084e+06	5.5411e+06	7
