# Supplementary material for: A FRET-based study reveals site-specific regulation of spindle position checkpoint proteins at yeast centrosomes
Source: eLife. 2016 May 9;5:e14029. doi: 10.7554/eLife.14029 (PMC4878874; doi:10.7554/eLife.14029)
Supplement: Figure 2—source data 1. — DOI: http://dx.doi.org/10.7554/eLife.14029.011 [file elife-14029-fig2-data1.xlsx]

## Sheet: Description
Description:
List of Abbreviations
Raw Mean Fluoresence Intensity before bleach (Donor/Aceptor): FL (DA) bb
Raw Mean Fluoresence Intensity before bleach (Donor only): FL (D) bb
Raw Mean Fluoresence Intensity before bleach (Background): FL (bg) bb
Raw Mean Fluoresence Intensity after bleach (Donor/Aceptor): FL (DA) ab
Raw Mean Fluoresence Intensity after bleach (Donor only): FL (D) ab
RawMean Fluoresence Intensity after bleach (Background): FL (bg) ab
Calculated FRET efficiency % for the indicated Donor/Acceptor pair) : FRET % (DA)
Calculated FRET efficiency % background for Donor only sample : FRET % (D)
daughter SPB: dSPB
mother SPB: mSPB
P-value for the indicated pair FRET % (DA) and FRET % (D) according to students t-test: P

## Sheet: Experiment 1
pair: Spc72-mTUR Bfa1-EYFP									pair: Spc72-mTUR Bfa1-EYFP
condition: Gal1-CDC20, signals at the daughter SPB									condition: Gal1-CDC20, signals at the mother SPB
P=0,000420787									P=0,004700056
FL(bg)bb	FL(bg)ab	FL(DA)bb dSPB	FL(DA)ab dSPB	FRET(DA) % dSPB	FL(D)bb	FL(D)ab	FRET(D) %		FL(bg)bb	FL(bg)ab	FL(DA)bb mSPB	FL(DA)ab mSPB	FRET(DA) % mSPB	FL(D)bb	FL(D)ab	FRET(D) %
6.90308e+06	6.82173e+06	6.90375e+06	6.8228e+06	42.203	6.90396e+06	6.82247e+06	-18.278		6.90308e+06	6.82173e+06	6.90348e+06	6.82204e+06	-21.776	6.90396e+06	6.82247e+06	-18.278
6.90308e+06	6.82173e+06	6.90345e+06	6.82227e+06	37.755	6.90391e+06	6.82252e+06	-5.354		6.90308e+06	6.82173e+06	6.90317e+06	6.82187e+06	42.405	6.90391e+06	6.82252e+06	-5.354
6.90308e+06	6.82173e+06	6.90366e+06	6.82228e+06	0.72796	6.9036e+06	6.82237e+06	19.973		6.90308e+06	6.82173e+06	6.90437e+06	6.82288e+06	-7.0777	6.9036e+06	6.82237e+06	19.973
6.90308e+06	6.82173e+06	6.9033e+06	6.82207e+06	39.837	6.90455e+06	6.82318e+06	-1.1599		6.90308e+06	6.82173e+06	6.90487e+06	6.82339e+06	-2.9661	6.90455e+06	6.82318e+06	-1.1599
6.90308e+06	6.82173e+06	6.90357e+06	6.82232e+06	22.118	6.90415e+06	6.82283e+06	3.1588		6.90308e+06	6.82173e+06	6.90336e+06	6.82205e+06	20.928	6.90415e+06	6.82283e+06	3.1588
6.90308e+06	6.82173e+06	6.90423e+06	6.82274e+06	-8.8053	6.90358e+06	6.82242e+06	27.767		6.90308e+06	6.82173e+06	6.90354e+06	6.82206e+06	-33.198	6.90358e+06	6.82242e+06	27.767
6.90308e+06	6.82173e+06	6.90365e+06	6.82268e+06	44.752	6.90503e+06	6.82388e+06	9.4021		6.90308e+06	6.82173e+06	6.90387e+06	6.82262e+06	16.8	6.90503e+06	6.82388e+06	9.4021
6.90308e+06	6.82173e+06	6.90337e+06	6.82206e+06	17.965	6.9049e+06	6.82328e+06	-16.789		6.90308e+06	6.82173e+06	6.90327e+06	6.82204e+06	45.8	6.9049e+06	6.82328e+06	-16.789
6.90308e+06	6.82173e+06	6.9035e+06	6.82229e+06	30.8	6.90424e+06	6.82254e+06	-42.623		6.90308e+06	6.82173e+06	6.90353e+06	6.82229e+06	25.256	6.90424e+06	6.82254e+06	-42.623
6.90308e+06	6.82173e+06	6.90389e+06	6.8225e+06	-0.2	6.90396e+06	6.82273e+06	12.445		6.90308e+06	6.82173e+06	6.90363e+06	6.82228e+06	4.748	6.90396e+06	6.82273e+06	12.445
6.90308e+06	6.82173e+06	6.90349e+06	6.82223e+06	23.044	6.9035e+06	6.82201e+06	-51.893		6.90308e+06	6.82173e+06	6.90356e+06	6.82208e+06	-30.607	6.9035e+06	6.82201e+06	-51.893
6.90308e+06	6.82173e+06	6.90368e+06	6.82241e+06	17.239	6.90455e+06	6.82308e+06	-9.2835		6.90308e+06	6.82173e+06	6.90381e+06	6.82242e+06	-1.1075	6.90455e+06	6.82308e+06	-9.2835
6.90308e+06	6.82173e+06	6.90458e+06	6.82305e+06	-8.2	6.90429e+06	6.82267e+06	-28.002		6.90308e+06	6.82173e+06	6.90391e+06	6.82294e+06	36.8	6.90429e+06	6.82267e+06	-28.002
6.90308e+06	6.82173e+06	6.90554e+06	6.82453e+06	16.8	6.90316e+06	6.82179e+06	-22.021		6.90308e+06	6.82173e+06	6.90495e+06	6.82359e+06	4.8	6.90316e+06	6.82179e+06	-22.021
6.90308e+06	6.82173e+06	6.90311e+06	6.82178e+06	61.8	6.90444e+06	6.82298e+06	-8.4404		6.90308e+06	6.82173e+06	6.90378e+06	6.823e+06	49.8	6.90444e+06	6.82298e+06	-8.4404
6.90308e+06	6.82173e+06	6.90351e+06	6.82206e+06	-24.2	6.90416e+06	6.8228e+06	0		6.90308e+06	6.82173e+06	6.90369e+06	6.82235e+06	6.8	6.90416e+06	6.8228e+06	0
6.90308e+06	6.82173e+06	6.90318e+06	6.82183e+06	10.8	6.90405e+06	6.82253e+06	-20		6.90308e+06	6.82173e+06	6.90498e+06	6.82347e+06	-4.2	6.90405e+06	6.82253e+06	-20
6.90308e+06	6.82173e+06	6.90462e+06	6.82338e+06	11.398	6.90517e+06	6.82383e+06	0		6.90308e+06	6.82173e+06	6.90339e+06	6.82193e+06	-47.2	6.90517e+06	6.82383e+06	0
6.90308e+06	6.82173e+06	6.90345e+06	6.82199e+06	-35.839	6.90443e+06	6.82335e+06	17		6.90308e+06	6.82173e+06	6.90325e+06	6.82192e+06	16.8	6.90443e+06	6.82335e+06	17
6.90308e+06	6.82173e+06	6.90332e+06	6.82217e+06	50.8	6.90339e+06	6.82224e+06	39		6.90308e+06	6.82173e+06	6.90381e+06	6.82256e+06	17.8	6.90339e+06	6.82224e+06	39
6.90308e+06	6.82173e+06	6.90321e+06	6.82218e+06	76.8	6.90467e+06	6.82329e+06	-2		6.90308e+06	6.82173e+06	6.90393e+06	6.82266e+06	12.8	6.90467e+06	6.82329e+06	-2
6.90308e+06	6.82173e+06	6.9037e+06	6.8227e+06	40.8	6.90564e+06	6.82442e+06	5		6.90308e+06	6.82173e+06	6.90367e+06	6.82249e+06	27.8	6.90564e+06	6.82442e+06	5
6.90308e+06	6.82173e+06	6.90511e+06	6.82376e+06	4.8	6.90432e+06	6.82285e+06	-11		6.90308e+06	6.82173e+06	6.90367e+06	6.82255e+06	33.8	6.90432e+06	6.82285e+06	-11
6.90308e+06	6.82173e+06	6.90325e+06	6.82193e+06	24.8	6.90435e+06	6.82297e+06	-2		6.90308e+06	6.82173e+06	6.90334e+06	6.82199e+06	5.8	6.90435e+06	6.82297e+06	-2
6.90308e+06	6.82173e+06	6.90435e+06	6.82308e+06	10.8	6.90524e+06	6.82361e+06	-15		6.90308e+06	6.82173e+06	6.9036e+06	6.82249e+06	36.8	6.90524e+06	6.82361e+06	-15
6.90308e+06	6.82173e+06	6.90368e+06	6.82243e+06	18.8					6.90308e+06	6.82173e+06	6.90353e+06	6.82218e+06	5.8
6.90308e+06	6.82173e+06	6.90352e+06	6.82217e+06	6.8					6.90308e+06	6.82173e+06	6.90357e+06	6.82234e+06	25.346
6.90308e+06	6.82173e+06	6.9035e+06	6.82212e+06	-2.2					6.90308e+06	6.82173e+06	6.90341e+06	6.82203e+06	-2.6242
6.90308e+06	6.82173e+06	6.90408e+06	6.82284e+06	14.8					6.90308e+06	6.82173e+06	6.90366e+06	6.8223e+06	3.0381
6.90308e+06	6.82173e+06	6.90428e+06	6.82302e+06	11.8					6.90308e+06	6.82173e+06	6.90325e+06	6.82196e+06	34.143
6.90308e+06	6.82173e+06	6.90314e+06	6.82193e+06	75.8					6.90308e+06	6.82173e+06	6.90333e+06	6.82197e+06	2.029
6.90308e+06	6.82173e+06	6.90377e+06	6.82236e+06	-4.2					6.90308e+06	6.82173e+06	6.90409e+06	6.82287e+06	16.16
6.90308e+06	6.82173e+06	6.9038e+06	6.82248e+06	9.8					6.90308e+06	6.82173e+06	6.9036e+06	6.82239e+06	26.13
6.90308e+06	6.82173e+06	6.90366e+06	6.82233e+06	8.2319					6.90308e+06	6.82173e+06	6.90332e+06	6.82199e+06	10.101
6.90308e+06	6.82173e+06	6.90348e+06	6.82214e+06	6.3161					6.90308e+06	6.82173e+06	6.90348e+06	6.82213e+06	6.9885
6.90308e+06	6.82173e+06	6.90386e+06	6.82259e+06	14.743					6.90308e+06	6.82173e+06	6.90326e+06	6.82197e+06	32.404
6.90308e+06	6.82173e+06	6.90338e+06	6.82201e+06	0.77889					6.90308e+06	6.82173e+06	6.9032e+06	6.82185e+06	9.276
6.90308e+06	6.82173e+06	6.90335e+06	6.82197e+06	-7.7663					6.90308e+06	6.82173e+06	6.9034e+06	6.82216e+06	30.522
6.90308e+06	6.82173e+06	6.90341e+06	6.82216e+06	29.749					6.90308e+06	6.82173e+06	6.90331e+06	6.82196e+06	5.4821
6.90308e+06	6.82173e+06	6.90423e+06	6.82284e+06	1.6328					6.90308e+06	6.82173e+06	6.90356e+06	6.8222e+06	3.3845
6.90308e+06	6.82173e+06	6.90383e+06	6.82262e+06	20.175					6.90308e+06	6.82173e+06	6.90349e+06	6.8221e+06	-7.6278
6.90308e+06	6.82173e+06	6.90332e+06	6.8221e+06	39.132					6.90308e+06	6.82173e+06	6.90365e+06	6.82242e+06	22.437
6.90308e+06	6.82173e+06	6.90334e+06	6.82202e+06	14.938
6.90308e+06	6.82173e+06	6.90389e+06	6.82261e+06	13.198
6.90308e+06	6.82173e+06	6.90373e+06	6.82249e+06	19.447
6.90308e+06	6.82173e+06	6.90325e+06	6.82192e+06	16.806
6.90308e+06	6.82173e+06	6.90345e+06	6.82223e+06	29.892
6.90308e+06	6.82173e+06	6.90312e+06	6.82181e+06	58.941
6.90308e+06	6.82173e+06	6.90319e+06	6.82186e+06	20.089
6.90308e+06	6.82173e+06	6.90344e+06	6.82207e+06	-0.5354
6.90308e+06	6.82173e+06	6.90359e+06	6.82226e+06	10.026
6.90308e+06	6.82173e+06	6.90336e+06	6.82207e+06	22.759
6.90308e+06	6.82173e+06	6.90327e+06	6.82195e+06	20.681
6.90308e+06	6.82173e+06	6.90311e+06	6.82177e+06	34.26
6.90308e+06	6.82173e+06	6.90335e+06	6.82214e+06	39.435
6.90308e+06	6.82173e+06	6.90311e+06	6.82178e+06	37.817
6.90308e+06	6.82173e+06	6.90348e+06	6.82208e+06	-8.6947
6.90308e+06	6.82173e+06	6.9035e+06	6.82214e+06	5.036
6.90308e+06	6.82173e+06	6.90311e+06	6.82189e+06	88.048
6.90308e+06	6.82173e+06	6.90322e+06	6.82198e+06	48.718
6.90308e+06	6.82173e+06	6.90325e+06	6.82197e+06	36.911
6.90308e+06	6.82173e+06	6.90314e+06	6.82185e+06	59.746
6.90308e+06	6.82173e+06	6.90342e+06	6.82206e+06	2.1597
6.90308e+06	6.82173e+06	6.90358e+06	6.82198e+06	-88.639
6.90308e+06	6.82173e+06	6.90377e+06	6.82224e+06	-28.947

## Sheet: Experiment2
pair: Spc72-mTUR Bfa1-EYFP									pair: Spc72-mTUR Bfa1-EYFP
condition: Gal1-CDC20, signals at the daughter SPB									condition: Gal1-CDC20, signals at the mother SPB
P=0,003									P=0,032
FL(bg)bb	FL(bg)ab	FL(D)bb	FL(D)ab	FRET (D) %	FL(DA)bb	FL(DA)ab	FRET(DA) %		FL(bg)bb	FL(bg)ab	FL(D)bb	FL(D)ab	FRET (D) %	FL(DA)bb	FL(DA)ab	FRET(DA) %
6.41561e+06	6.36363e+06	6.41649e+06	6.36438e+06	-16.278	6.36494e+06	5.03127e+06	12		6.41561e+06	6.36363e+06	6.41649e+06	6.36438e+06	-16.278	6.36439e+06	6.36451e+06	16
6.41561e+06	6.36363e+06	6.41644e+06	6.36442e+06	-3.354	6.36514e+06	5.03119e+06	24		6.41561e+06	6.36363e+06	6.41644e+06	6.36442e+06	-3.354	6.36418e+06	6.36415e+06	-5
6.41561e+06	6.36363e+06	6.41612e+06	6.36427e+06	21.973	6.36482e+06	5.02972e+06	22		6.41561e+06	6.36363e+06	6.41612e+06	6.36427e+06	21.973	6.36397e+06	6.36407e+06	26
6.41561e+06	6.36363e+06	6.41708e+06	6.36508e+06	0.8401	6.36442e+06	5.03018e+06	-18		6.41561e+06	6.36363e+06	6.41708e+06	6.36508e+06	0.8401	6.36404e+06	6.3642e+06	31
6.41561e+06	6.36363e+06	6.41667e+06	6.36473e+06	5.1588	6.36397e+06	5.03137e+06	43		6.41561e+06	6.36363e+06	6.41667e+06	6.36473e+06	5.1588	6.36402e+06	6.36408e+06	15
6.41561e+06	6.36363e+06	6.41611e+06	6.36433e+06	29.767	6.36401e+06	5.03088e+06	-28		6.41561e+06	6.36363e+06	6.41611e+06	6.36433e+06	29.767	6.36412e+06	6.36432e+06	32
6.41561e+06	6.36363e+06	6.41755e+06	6.36578e+06	11.4021	6.36389e+06	5.03091e+06	-2		6.41561e+06	6.36363e+06	6.41755e+06	6.36578e+06	11.4021	6.36406e+06	6.36387e+06	-82
6.41561e+06	6.36363e+06	6.41742e+06	6.36519e+06	-14.789	6.36387e+06	5.03048e+06	36		6.41561e+06	6.36363e+06	6.41742e+06	6.36519e+06	-14.789	6.36399e+06	6.36404e+06	14
6.41561e+06	6.36363e+06	6.41677e+06	6.36444e+06	-40.623	6.36383e+06	5.03038e+06	-22		6.41561e+06	6.36363e+06	6.41677e+06	6.36444e+06	-40.623	6.36426e+06	6.36416e+06	-17
6.41561e+06	6.36363e+06	6.41649e+06	6.36463e+06	14.445	6.36432e+06	5.03038e+06	20		6.41561e+06	6.36363e+06	6.41649e+06	6.36463e+06	14.445	6.36431e+06	6.36429e+06	0
6.41561e+06	6.36363e+06	6.41603e+06	6.36391e+06	-49.893	6.3643e+06	5.03019e+06	8		6.41561e+06	6.36363e+06	6.41603e+06	6.36391e+06	-49.893	6.36501e+06	6.36479e+06	-17
6.41561e+06	6.36363e+06	6.41708e+06	6.36498e+06	-7.2835	6.36384e+06	5.03058e+06	38		6.41561e+06	6.36363e+06	6.41708e+06	6.36498e+06	-7.2835	6.36424e+06	6.36454e+06	35
6.41561e+06	6.36363e+06	6.41682e+06	6.36458e+06	-26.002	6.36396e+06	5.03063e+06	45		6.41561e+06	6.36363e+06	6.41682e+06	6.36458e+06	-26.002	6.3638e+06	6.36404e+06	61
6.41561e+06	6.36363e+06	6.41568e+06	6.36369e+06	-20.021	6.36396e+06	5.03067e+06	16		6.41561e+06	6.36363e+06	6.41568e+06	6.36369e+06	-20.021	6.36454e+06	6.36463e+06	11
6.41561e+06	6.36363e+06	6.41697e+06	6.36488e+06	-6.4404	6.36417e+06	5.03014e+06	11		6.41561e+06	6.36363e+06	6.41697e+06	6.36488e+06	-6.4404	6.36378e+06	6.36383e+06	30
6.41561e+06	6.36363e+06	6.41668e+06	6.3647e+06	2	6.3645e+06	5.03022e+06	1		6.41561e+06	6.36363e+06	6.41668e+06	6.3647e+06	2	6.36396e+06	6.36415e+06	39
6.41561e+06	6.36363e+06	6.41658e+06	6.36444e+06	-18	6.3643e+06	5.03029e+06	21		6.41561e+06	6.36363e+06	6.41658e+06	6.36444e+06	-18	6.36421e+06	6.36439e+06	25
6.41561e+06	6.36363e+06	6.4177e+06	6.36573e+06	2	6.36388e+06	5.03112e+06	10		6.41561e+06	6.36363e+06	6.4177e+06	6.36573e+06	2	6.36381e+06	6.36379e+06	-9
6.41561e+06	6.36363e+06	6.41696e+06	6.36525e+06	19	6.36484e+06	5.02994e+06	23		6.41561e+06	6.36363e+06	6.41696e+06	6.36525e+06	19	6.36427e+06	6364220	-7
6.41561e+06	6.36363e+06	6.41592e+06	6.36414e+06	41	6.36455e+06	5.03035e+06	22		6.41561e+06	6.36363e+06	6.41592e+06	6.36414e+06	41	6.36461e+06	6.36485e+06	21
6.41561e+06	6.36363e+06	6.4172e+06	6.36519e+06	0	6.36423e+06	5.02991e+06	-9		6.41561e+06	6.36363e+06	6.4172e+06	6.36519e+06	0	6.36479e+06	6.36515e+06	25
6.41561e+06	6.36363e+06	6.41817e+06	6.36633e+06	7	6.36487e+06	5.031e+06	2		6.41561e+06	6.36363e+06	6.41817e+06	6.36633e+06	7	6.36374e+06	6.36386e+06	56
6.41561e+06	6.36363e+06	6.41685e+06	6.36475e+06	-9	6.36482e+06	5.03046e+06	4		6.41561e+06	6.36363e+06	6.41685e+06	6.36475e+06	-9
6.41561e+06	6.36363e+06	6.41688e+06	6.36487e+06	0	6.36458e+06	5.03312e+06	-19		6.41561e+06	6.36363e+06	6.41688e+06	6.36487e+06	0
6.41561e+06	6.36363e+06	6.41776e+06	6.36551e+06	-13	6.36406e+06	5.03185e+06	24		6.41561e+06	6.36363e+06	6.41776e+06	6.36551e+06	-13
6.41561e+06	6.36363e+06				6.36413e+06	5.03068e+06	16
6.41561e+06	6.36363e+06				6.36425e+06	5.03104e+06	36
6.41561e+06	6.36363e+06				6.36427e+06	5.03099e+06	14
6.41561e+06	6.36363e+06				6.36434e+06	5.03021e+06	15
6.41561e+06	6.36363e+06				6.36482e+06	5.03142e+06	18
6.41561e+06	6.36363e+06				6.36379e+06	5.03065e+06	71
