# Supplementary material for: A FRET-based study reveals site-specific regulation of spindle position checkpoint proteins at yeast centrosomes
Source: eLife. 2016 May 9;5:e14029. doi: 10.7554/eLife.14029 (PMC4878874; doi:10.7554/eLife.14029)
Supplement: Figure 2—source data 2. — DOI: http://dx.doi.org/10.7554/eLife.14029.012 [file elife-14029-fig2-data2.xls]

## Sheet: Description
Description:
List of Abbreviations
Raw Mean Fluoresence Intensity before bleach (Donor/Aceptor): FL (DA) bb
Raw Mean Fluoresence Intensity before bleach (Donor only): FL (D) bb
Raw Mean Fluoresence Intensity before bleach (Background): FL (bg) bb
Raw Mean Fluoresence Intensity after bleach (Donor/Aceptor): FL (DA) ab
Raw Mean Fluoresence Intensity after bleach (Donor only): FL (D) ab
RawMean Fluoresence Intensity after bleach (Background): FL (bg) ab
Calculated FRET efficiency % for the indicated Donor/Acceptor pai) : FRET % (DA)
Calculated FRET efficiency % background for Donor only sample : FRET % (D)

## Sheet: Experiment1 
pair: Nud1-mTUR Bfa1-EYFP									pair: Nud1-mTUR Bfa1-EYFP
condition: Gal1-CDC20, signals at the daughter SPB									condition: Gal1-CDC20, signals at the mother SPB
P=0,019*10¯⁸									P=0,078*10¯⁴
FL(bg)bb	FL(bg)ab	FL(D)bb	FL(D)ab	FRET (D) %	FL(DA)bb	FL(DA)ab	FRET(DA) %		FL(bg)bb	FL(bg)ab	FL(D)bb	FL(D)ab	FRET (D) %	FL(DA)bb	FL(DA)ab	FRET(DA) %
5.06736e+06	5.02938e+06	5.06929e+06	5.0313e+06	6.49978	5.06911e+06	5.03127e+06	14.385		5.06736e+06	5.02938e+06	5.06929e+06	5.0313e+06	6.49978	5.06803e+06	5.03001e+06	2.9224
5.06736e+06	5.02938e+06	5.06939e+06	5.03131e+06	2.2819	5.06915e+06	5.03119e+06	8.1529		5.06736e+06	5.02938e+06	5.06939e+06	5.03131e+06	2.2819	5.068e+06	5.03001e+06	7.32409
5.06736e+06	5.02938e+06	5.06845e+06	5.0306e+06	17.98	5.06772e+06	5.02972e+06	3.9764		5.06736e+06	5.02938e+06	5.06845e+06	5.0306e+06	17.98	5.06771e+06	5.03e+06	51.521
5.06736e+06	5.02938e+06	5.06819e+06	5.03001e+06	-24.265	5.06816e+06	5.03018e+06	7.88257		5.06736e+06	5.02938e+06	5.06819e+06	5.03001e+06	-24.265	5.06767e+06	5.02963e+06	-11.417
5.06736e+06	5.02938e+06	5.0684e+06	5.03027e+06	-8.426	5.06898e+06	5.03137e+06	26.272		5.06736e+06	5.02938e+06	5.0684e+06	5.03027e+06	-8.426	5.06905e+06	5.03088e+06	-4.805
5.06736e+06	5.02938e+06	5.06803e+06	5.02996e+06	-7.944	5.06917e+06	5.03088e+06	-12.709		5.06736e+06	5.02938e+06	5.06803e+06	5.02996e+06	-7.944	5.06753e+06	5.02969e+06	54.441
5.06736e+06	5.02938e+06	5.06866e+06	5.03059e+06	0.0031	5.06873e+06	5.03091e+06	17.36		5.06736e+06	5.02938e+06	5.06866e+06	5.03059e+06	0.0031	5.06787e+06	5.03041e+06	58.564
5.06736e+06	5.02938e+06	5.06807e+06	5.0301e+06	10.2988	5.06829e+06	5.03048e+06	22.798		5.06736e+06	5.02938e+06	5.06807e+06	5.0301e+06	10.2988	5.06798e+06	5.03003e+06	12.3226
5.06736e+06	5.02938e+06	5.06861e+06	5.03041e+06	-13.198	5.06817e+06	5.03038e+06	26.657		5.06736e+06	5.02938e+06	5.06861e+06	5.03041e+06	-13.198	5.06748e+06	5.02953e+06	29.715
5.06736e+06	5.02938e+06	5.06837e+06	5.03016e+06	-22.132	5.06822e+06	5.03038e+06	22.169		5.06736e+06	5.02938e+06	5.06837e+06	5.03016e+06	-22.132	5.07091e+06	5.03274e+06	1.356
5.06736e+06	5.02938e+06	5.06848e+06	5.0303e+06	-13.833	5.06795e+06	5.03019e+06	34.31		5.06736e+06	5.02938e+06	5.06848e+06	5.0303e+06	-13.833	5.07161e+06	5.0337e+06	8.7697
5.06736e+06	5.02938e+06	5.06831e+06	5.03008e+06	-26.456	5.06849e+06	5.03058e+06	13.2956		5.06736e+06	5.02938e+06	5.06831e+06	5.03008e+06	-26.456	5.06833e+06	5.03047e+06	18.338
5.06736e+06	5.02938e+06	5.06762e+06	5.02965e+06	12.3251	5.06841e+06	5.03063e+06	23.451		5.06736e+06	5.02938e+06	5.06762e+06	5.02965e+06	12.3251	5.06874e+06	5.03076e+06	7.50486
5.06736e+06	5.02938e+06	5.06871e+06	5.03061e+06	-2.193	5.06854e+06	5.03067e+06	15.8218		5.06736e+06	5.02938e+06	5.06871e+06	5.03061e+06	-2.193	5.06815e+06	5.03035e+06	26.152
5.06736e+06	5.02938e+06	5.06757e+06	5.02955e+06	-9.429	5.06804e+06	5.03014e+06	18.299		5.06736e+06	5.02938e+06	5.06757e+06	5.02955e+06	-9.429	5.06804e+06	5.02997e+06	-6.37
5.06736e+06	5.02938e+06	5.06942e+06	5.03146e+06	8.533	5.06808e+06	5.03022e+06	22.297		5.06736e+06	5.02938e+06	5.06942e+06	5.03146e+06	8.533	5.06856e+06	5.03053e+06	3.5789
5.06736e+06	5.02938e+06	5.07e+06	5.03197e+06	5.5707	5.06824e+06	5.03029e+06	10.9258		5.06736e+06	5.02938e+06	5.07e+06	5.03197e+06	5.5707	5.06799e+06	5.03016e+06	27.362
5.06736e+06	5.02938e+06	5.06825e+06	5.03005e+06	-25.309	5.0689e+06	5.03112e+06	18.728		5.06736e+06	5.02938e+06	5.06825e+06	5.03005e+06	-25.309	5.06841e+06	5.03071e+06	28.504
5.06736e+06	5.02938e+06	5.06883e+06	5.03077e+06	1.2865	5.06774e+06	5.02994e+06	40.289		5.06736e+06	5.02938e+06	5.06883e+06	5.03077e+06	1.2865	5.06822e+06	5.0303e+06	8.5073
5.06736e+06	5.02938e+06	5.06974e+06	5.03151e+06	-4.255	5.06825e+06	5.03035e+06	16.4397		5.06736e+06	5.02938e+06	5.06974e+06	5.03151e+06	-4.255	5.06843e+06	5.03072e+06	14.9705
5.06736e+06	5.02938e+06	5.06938e+06	5.03131e+06	2.2599	5.06781e+06	5.02991e+06	23.921		5.06736e+06	5.02938e+06	5.06938e+06	5.03131e+06	2.2599	5.0678e+06	5.02996e+06	27.68
5.06736e+06	5.02938e+06	5.0682e+06	5.03022e+06	7.79968	5.06896e+06	5.031e+06	8.2408		5.06736e+06	5.02938e+06	5.0682e+06	5.03022e+06	7.79968	5.06909e+06	5.03101e+06	1.1586
5.06736e+06	5.02938e+06	5.06835e+06	5.03057e+06	24.124	5.06823e+06	5.03046e+06	26.751		5.06736e+06	5.02938e+06	5.06835e+06	5.03057e+06	24.124	5.06793e+06	5.02992e+06	4.3976
5.06736e+06	5.02938e+06	5.0689e+06	5.03092e+06	7.21796	5.07111e+06	5.03312e+06	6.82734		5.06736e+06	5.02938e+06	5.0689e+06	5.03092e+06	7.21796	5.06846e+06	5.03057e+06	15.2819
5.06736e+06	5.02938e+06	5.06899e+06	5.03094e+06	2.628	5.06994e+06	5.03185e+06	2.6914		5.06736e+06	5.02938e+06	5.06899e+06	5.03094e+06	2.628	5.06825e+06	5.03024e+06	4.6591
5.06736e+06	5.02938e+06	5.06906e+06	5.03088e+06	-6.06	5.06847e+06	5.03068e+06	22.601		5.06736e+06	5.02938e+06	5.06906e+06	5.03088e+06	-6.06	5.06766e+06	5.02969e+06	13.6129
5.06736e+06	5.02938e+06	5.06815e+06	5.03019e+06	9.7785	5.06864e+06	5.03104e+06	30.211		5.06736e+06	5.02938e+06	5.06815e+06	5.03019e+06	9.7785	5.06848e+06	5.0302e+06	-28.404
5.06736e+06	5.02938e+06	5.06825e+06	5.0302e+06	0.2299	5.06915e+06	5.03099e+06	-3.612		5.06736e+06	5.02938e+06	5.06825e+06	5.0302e+06	0.2299	5.06787e+06	5.02986e+06	2.2864
5.06736e+06	5.02938e+06	5.06886e+06	5.03073e+06	-3.466	5.06808e+06	5.03021e+06	20.456		5.06736e+06	5.02938e+06	5.06886e+06	5.03073e+06	-3.466	5.0683e+06	5.03065e+06	33.647
5.06736e+06	5.02938e+06	5.0682e+06	5.03036e+06	22.061	5.06937e+06	5.03142e+06	8.7674		5.06736e+06	5.02938e+06	5.0682e+06	5.03036e+06	22.061	5.06807e+06	5.03021e+06	22.636
5.06736e+06	5.02938e+06	5.06806e+06	5.02992e+06	-20.641	5.06845e+06	5.03065e+06	21.628		5.06736e+06	5.02938e+06	5.06806e+06	5.02992e+06	-20.641	5.06952e+06	5.03136e+06	-1.3836
5.06736e+06	5.02938e+06	5.06886e+06	5.03087e+06	6.8214	5.06826e+06	5.03029e+06	8.4537		5.06736e+06	5.02938e+06	5.06886e+06	5.03087e+06	6.8214	5.06776e+06	5.02999e+06	43.029
5.06736e+06	5.02938e+06	5.06898e+06	5.03084e+06	-3.819	5.06774e+06	5.02997e+06	43		5.06736e+06	5.02938e+06	5.06898e+06	5.03084e+06	-3.819	5.06783e+06	5.03005e+06	38.194
5.06736e+06	5.02938e+06	5.0679e+06	5.02982e+06	-14.243	5.06884e+06	5.03101e+06	16.6773		5.06736e+06	5.02938e+06	5.0679e+06	5.02982e+06	-14.243	5.06861e+06	5.03067e+06	10.7397
5.06736e+06	5.02938e+06	5.06848e+06	5.03026e+06	-19.278	5.06901e+06	5.0312e+06	16.6702		5.06736e+06	5.02938e+06	5.06848e+06	5.03026e+06	-19.278	5.06842e+06	5.03068e+06	25.76
5.06736e+06	5.02938e+06				5.06875e+06	5.03078e+06	8.138		5.06736e+06	5.02938e+06				5.06921e+06	5.03114e+06	2.4249
5.06736e+06	5.02938e+06				5.06987e+06	5.03207e+06	14.0356		5.06736e+06	5.02938e+06				5.06794e+06	5.02993e+06	2.9775
5.06736e+06	5.02938e+06				5.07014e+06	5.03223e+06	9.6967		5.06736e+06	5.02938e+06				5.06814e+06	5.03009e+06	-1.5398
5.06736e+06	5.02938e+06				5.0684e+06	5.03043e+06	8.5158		5.06736e+06	5.02938e+06				5.06845e+06	5.03057e+06	15.9282
5.06736e+06	5.02938e+06				5.06931e+06	5.03147e+06	13.7646		5.06736e+06	5.02938e+06				5.06812e+06	5.03016e+06	11.0791
5.06736e+06	5.02938e+06				5.0678e+06	5.02996e+06	31.82		5.06736e+06	5.02938e+06				5.06909e+06	5.03109e+06	5.8357
5.06736e+06	5.02938e+06				5.06769e+06	5.02974e+06	17.023		5.06736e+06	5.02938e+06				5.06905e+06	5.03117e+06	12.7092
5.06736e+06	5.02938e+06				5.06864e+06	5.03071e+06	10.525		5.06736e+06	5.02938e+06				5.06775e+06	5.02991e+06	35.183
5.06736e+06	5.02938e+06				5.06808e+06	5.03034e+06	32.727		5.06736e+06	5.02938e+06				5.0682e+06	5.03035e+06	20.525
5.06736e+06	5.02938e+06				5.06853e+06	5.03047e+06	0.0518		5.06736e+06	5.02938e+06				5.06846e+06	5.03052e+06	11.2487
5.06736e+06	5.02938e+06				5.06822e+06	5.03026e+06	9.9405		5.06736e+06	5.02938e+06				5.06795e+06	5.03012e+06	28.19
5.06736e+06	5.02938e+06				5.06823e+06	5.03013e+06	-9.05		5.06736e+06	5.02938e+06				5.06876e+06	5.03046e+06	-22.42
5.06736e+06	5.02938e+06				5.06765e+06	5.02971e+06	19.969		5.06736e+06	5.02938e+06				5.07076e+06	5.03279e+06	7.32892
5.06736e+06	5.02938e+06				5.06894e+06	5.03067e+06	-14.597		5.06736e+06	5.02938e+06				5.06879e+06	5.03079e+06	6.18431
5.06736e+06	5.02938e+06				5.06758e+06	5.02965e+06	26.279		5.06736e+06	5.02938e+06				5.06792e+06	5.03e+06	16.994
5.06736e+06	5.02938e+06				5.06808e+06	5.03045e+06	40.031		5.06736e+06	5.02938e+06				5.06824e+06	5.03028e+06	10.0636
5.06736e+06	5.02938e+06				5.06836e+06	5.0303e+06	-0.3785		5.06736e+06	5.02938e+06				5.06833e+06	5.03051e+06	21.763
5.06736e+06	5.02938e+06				5.06825e+06	5.03012e+06	-11.098		5.06736e+06	5.02938e+06				5.06864e+06	5.03102e+06	29.476
5.06736e+06	5.02938e+06				5.06793e+06	5.03007e+06	25.374		5.06736e+06	5.02938e+06				5.06851e+06	5.03064e+06	16.2219
5.06736e+06	5.02938e+06				5.06798e+06	5.03016e+06	27.67		5.06736e+06	5.02938e+06				5.06851e+06	5.03036e+06	-9.071
5.06736e+06	5.02938e+06				5.06842e+06	5.03075e+06	30.491
5.06736e+06	5.02938e+06				5.06772e+06	5.02985e+06	32.651
5.06736e+06	5.02938e+06				5.0685e+06	5.03078e+06	26.079
5.06736e+06	5.02938e+06				5.0685e+06	5.03048e+06	4.1775
5.06736e+06	5.02938e+06				5.06821e+06	5.0305e+06	32.299
5.06736e+06	5.02938e+06				5.06776e+06	5.02986e+06	26.368
5.06736e+06	5.02938e+06				5.06772e+06	5.02991e+06	39.319
5.06736e+06	5.02938e+06				5.0682e+06	5.03052e+06	33.961
5.06736e+06	5.02938e+06				5.06854e+06	5.03048e+06	0.0101
5.06736e+06	5.02938e+06				5.06872e+06	5.03072e+06	5.4651
5.06736e+06	5.02938e+06				5.06847e+06	5.03054e+06	12.3494
5.06736e+06	5.02938e+06				5.06866e+06	5.03098e+06	26.405
5.06736e+06	5.02938e+06				5.0684e+06	5.03049e+06	14.4254
5.06736e+06	5.02938e+06				5.06871e+06	5.03095e+06	21.443
5.06736e+06	5.02938e+06				5.06909e+06	5.03087e+06	-8.335
5.06736e+06	5.02938e+06				5.06819e+06	5.03016e+06	1.1912
5.06736e+06	5.02938e+06				5.06822e+06	5.0304e+06	23.36
5.06736e+06	5.02938e+06				5.0685e+06	5.0307e+06	21.475
5.06736e+06	5.02938e+06				5.07063e+06	5.0327e+06	8.7356
5.06736e+06	5.02938e+06				5.06788e+06	5.02984e+06	-4.451
5.06736e+06	5.02938e+06				5.06923e+06	5.03149e+06	18.361
5.06736e+06	5.02938e+06				5.06835e+06	5.03053e+06	21.611
5.06736e+06	5.02938e+06				5.06926e+06	5.03136e+06	11.2457
5.06736e+06	5.02938e+06				5.06815e+06	5.03042e+06	31.694
5.06736e+06	5.02938e+06				5.06835e+06	5.03033e+06	2.4686
5.06736e+06	5.02938e+06				5.06882e+06	5.0308e+06	4.8432
5.06736e+06	5.02938e+06				5.06791e+06	5.03011e+06	32.38

## Sheet: Experiment2
pair: Nud1-mTUR Bfa1-EYFP									pair: Nud1-mTUR Bfa1-EYFP
condition: Gal1-CDC20, signals at the daughter SPB									condition: Gal1-CDC20, signals at the mother SPB
P=0,00012									P=0,015
FL(bg)bb	FL(bg)ab	FL(D)bb	FL(D)ab	FRET (D) %	FL(DA)bb	FL(DA)ab	FRET(DA) %		FL(bg)bb	FL(bg)ab	FL(D)bb	FL(D)ab	FRET (D) %	FL(DA)bb	FL(DA)ab	FRET(DA) %
4.39619e+06	4.42135e+06	5392146	5340655	-5.70737	5879676	5848902	-1.28783		4.39619e+06	4.42135e+06	5392146	5340655	-5.70737	5032471	5084647	6.70369
4.39619e+06	4.42135e+06	7694018	7618473	-0.51971	5709127	5756284	4.27815		4.39619e+06	4.42135e+06	7694018	7618473	-0.51971	5008804	5024157	1.00392
4.39619e+06	4.42135e+06	6786891	6924746	7.13187	5856843	5699618	-11.6377		4.39619e+06	4.42135e+06	6786891	6924746	7.13187	5116824	5153265	4.17195
4.39619e+06	4.42135e+06	7248227	7311164	3.93741	6511726	6615618	6.21829		4.39619e+06	4.42135e+06	7248227	7311164	3.93741	4659843	4716873	13.4158
4.39619e+06	4.42135e+06	7321864	7418409	5.01199	6325167	6344931	2.34973		4.39619e+06	4.42135e+06	7321864	7418409	5.01199	4980343	4995676	0.919796
4.39619e+06	4.42135e+06	6007563	5982573	-0.581911	6200039	6292147	6.20883		4.39619e+06	4.42135e+06	6007563	5982573	-0.581911	5160441	5163755	-0.311938
4.39619e+06	4.42135e+06	6643391	6610854	-0.00493966	5331735	5517627	17.292		4.39619e+06	4.42135e+06	6643391	6610854	-0.00493966	5786500	5905216	8.93519
4.39619e+06	4.42135e+06	6850437	6737791	-3.31882	6119186	6079480	-1.2817		4.39619e+06	4.42135e+06	6850437	6737791	-3.31882	5057774	5086421	3.15502
4.39619e+06	4.42135e+06	6429300	6607336	9.62366	5249186	5498343	23.4287		4.39619e+06	4.42135e+06	6429300	6607336	9.62366	4914814	4953157	5.10979
4.39619e+06	4.42135e+06	7318373	7474873	6.93141	5933647	5958412	2.60461		4.39619e+06	4.42135e+06	7318373	7474873	6.93141	6359647	6341863	0.394185
4.39619e+06	4.42135e+06	5814100	5817409	1.06516	5673461	5786608	9.07505		4.39619e+06	4.42135e+06	5814100	5817409	1.06516	4827765	4875206	7.54028
4.39619e+06	4.42135e+06	4769727	4734845	-16.5207	5278608	5412774	13.6253		4.39619e+06	4.42135e+06	4769727	4734845	-16.5207	5517716	5552980	3.52329
4.39619e+06	4.42135e+06	4794482	4792182	-4.7736	5065402	5079176	0.899885		4.39619e+06	4.42135e+06	4794482	4792182	-4.7736	5208373	5118955	-13.7937
4.39619e+06	4.42135e+06	5365282	5261336	-12.7394	5499392	5514421	1.7036		4.39619e+06	4.42135e+06	5365282	5261336	-12.7394	4595582	4602236	-7.59789
4.39619e+06	4.42135e+06	6292800	6075636	-12.0179	5083480	5192069	13.4554		4.39619e+06	4.42135e+06	6292800	6075636	-12.0179	4902518	4900746	-2.98686
4.39619e+06	4.42135e+06	6297082	6274264	0.040937	5227696	5400833	17.7381		4.39619e+06	4.42135e+06	6297082	6274264	0.040937	4714230	4777479	13.3265
4.39619e+06	4.42135e+06	5315418	5376418	6.3831	5804049	5873520	5.68169		4.39619e+06	4.42135e+06	5315418	5376418	6.3831	4689424	4708437	0.490534
4.39619e+06	4.42135e+06	5479791	5555173	7.05985	5980167	6159510	11.5007		4.39619e+06	4.42135e+06	5479791	5555173	7.05985	4657555	4726536	16.9902
4.39619e+06	4.42135e+06	5307582	5367945	6.3494	5794900	5878673	6.65228		4.39619e+06	4.42135e+06	5307582	5367945	6.3494	4575909	4680455	33.2699
4.39619e+06	4.42135e+06	5565600	5563945	0.283576	5880755	5897774	2.07893		4.39619e+06	4.42135e+06	5565600	5563945	0.283576
4.39619e+06	4.42135e+06	5275291	5325291	5.37849	7167588	7379824	8.95355		4.39619e+06	4.42135e+06	5275291	5325291	5.37849
4.39619e+06	4.42135e+06	5017509	5017018	-1.67543	4908039	4964657	8.42094		4.39619e+06	4.42135e+06	5017509	5017018	-1.67543
4.39619e+06	4.42135e+06	5150482	5142291	-1.99535	5195500	5310951	12.7801		4.39619e+06	4.42135e+06	5150482	5142291	-1.99535
4.39619e+06	4.42135e+06	4961027	4868800	-23.6034	4891039	4955921	10.0615		4.39619e+06	4.42135e+06	4961027	4868800	-23.6034
4.39619e+06	4.42135e+06	4736764	4761873	2.61643	5648382	5870608	16.228		4.39619e+06	4.42135e+06	4736764	4761873	2.61643
4.39619e+06	4.42135e+06	5289500	5321082	3.3443	5990765	5992500	1.13936		4.39619e+06	4.42135e+06	5289500	5321082	3.3443
4.39619e+06	4.42135e+06	5543373	5514518	-2.31069	5540186	5693520	12.7056		4.39619e+06	4.42135e+06	5543373	5514518	-2.31069
4.39619e+06	4.42135e+06	5207309	5272836	7.37131	4740353	4720961	-12.2382		4.39619e+06	4.42135e+06	5207309	5272836	7.37131
4.39619e+06	4.42135e+06	5396382	5397682	0.186659	5998882	5939318	-2.95108		4.39619e+06	4.42135e+06	5396382	5397682	0.186659
4.39619e+06	4.42135e+06	5746036	5869409	9.4127	6071173	5920455	-9.10185		4.39619e+06	4.42135e+06	5746036	5869409	9.4127
4.39619e+06	4.42135e+06	5211018	5178291	-5.01682	5768736	6045336	18.1132		4.39619e+06	4.42135e+06	5211018	5178291	-5.01682
4.39619e+06	4.42135e+06	5181136	5232464	5.85676	5385764	5325182	-6.85593		4.39619e+06	4.42135e+06	5181136	5232464	5.85676
4.39619e+06	4.42135e+06	4804882	4718218	-35.0358	6310464	6468536	9.12265		4.39619e+06	4.42135e+06	4804882	4718218	-35.0358
4.39619e+06	4.42135e+06	5677909	5634009	-3.06451	5838336	5809882	-1.23084		4.39619e+06	4.42135e+06	5677909	5634009	-3.06451
4.39619e+06	4.42135e+06	5387891	5262391	-15.2829	5866464	6056227	12.6985		4.39619e+06	4.42135e+06	5387891	5262391	-15.2829
4.39619e+06	4.42135e+06	5600118	5458764	-13.4204	5231518	5417555	18.7794		4.39619e+06	4.42135e+06	5600118	5458764	-13.4204
4.39619e+06	4.42135e+06	4711800	4647091	-37.1779	4979479	5044491	9.02607		4.39619e+06	4.42135e+06	4711800	4647091	-37.1779
4.39619e+06	4.42135e+06	5254655	5324636	7.5925	5573933	5580576	1.03306		4.39619e+06	4.42135e+06	5254655	5324636	7.5925
4.39619e+06	4.42135e+06	5767818	5753318	-0.347181	4941618	5009354	9.87153		4.39619e+06	4.42135e+06	5767818	5753318	-0.347181
4.39619e+06	4.42135e+06				5344746	5408036	6.49492
4.39619e+06	4.42135e+06				6336000	6340164	1.53603
4.39619e+06	4.42135e+06				5993691	6041409	4.02271
