# Supplementary material for: A FRET-based study reveals site-specific regulation of spindle position checkpoint proteins at yeast centrosomes
Source: eLife. 2016 May 9;5:e14029. doi: 10.7554/eLife.14029 (PMC4878874; doi:10.7554/eLife.14029)
Supplement: Figure 3—source data 1. — DOI: http://dx.doi.org/10.7554/eLife.14029.019 [file elife-14029-fig3-data1.xlsx]

## Sheet: Description
Description:
List of Abbreviations
Raw Mean Fluoresence Intensity before bleach (Donor/Aceptor): FL (DA) bb
Raw Mean Fluoresence Intensity before bleach (Donor only): FL (D) bb
Raw Mean Fluoresence Intensity before bleach (Background): FL (bg) bb
Raw Mean Fluoresence Intensity after bleach (Donor/Aceptor): FL (DA) ab
Raw Mean Fluoresence Intensity after bleach (Donor only): FL (D) ab
RawMean Fluoresence Intensity after bleach (Background): FL (bg) ab
Calculated FRET efficiency % for the indicated Donor/Acceptor pair) : FRET % (DA)
Calculated FRET efficiency % background for Donor only sample : FRET % (D)
daughter SPB: dSPB
mother SPB: mSPB
P-value for the indicated pair FRET % (DA) and FRET % (D) according to students t-test: P

## Sheet: Experiment 1
pair: Nud1-mTUR Bfa1-EYFP									pair: Nud1-mTUR Bfa1-eYFP
condition:Gal1-KIN4 overexpression									condition: Gal1-clb2∆DB over expression
P=0,09*10¯⁴									P=0,000130174
FL(bg)bb	FL(bg)ab	FL(DA)bb dSPB	FL(DA)ab dSPB	FRET(DA) % dSPB	FL(D)bb dSPB	FL(D)ab dSPB	FRET(D) %		FL(bg)bb	FL(bg)ab	FL(DA)bb dSPB	FL(DA)ab dSPB	FRET(DA) % dSPB	FL(bg)bb	FL(bg)ab	FL(D)bb dSPB	FL(D)ab dSPB	FRET(D) %
5.64757e+06	5.60073e+06	5.64948e+06	5.6025e+06	-2.0519	5.64983e+06	5.6029e+06	1.1544		6.57235e+06	6.53768e+06	6.57306e+06	6.53832e+06	-1.4129	6.57235e+06	6.53768e+06	6.57281e+06	6.53811e+06	3.1451
5.64757e+06	5.60073e+06	5.64976e+06	5.60297e+06	7.6296	5.64933e+06	5.60242e+06	1.5205		6.57235e+06	6.53768e+06	6.57265e+06	6.53789e+06	-32.66	6.57235e+06	6.53768e+06	6.57312e+06	6.53836e+06	-2.673
5.64757e+06	5.60073e+06	5.6495e+06	5.60284e+06	14.058	5.64952e+06	5.60254e+06	-2.135		6.57235e+06	6.53768e+06	6.57397e+06	6.53907e+06	-6.2051	6.57235e+06	6.53768e+06	6.57265e+06	6.53794e+06	-7.9379
5.64757e+06	5.60073e+06	5.6489e+06	5.60226e+06	18.865	5.64913e+06	5.60218e+06	-2.2462		6.57235e+06	6.53768e+06	6.57442e+06	6.53966e+06	5.9744	6.57235e+06	6.53768e+06	6.57316e+06	6.53845e+06	4.9043
5.64757e+06	5.60073e+06	5.64884e+06	5.60218e+06	17.871	5.64957e+06	5.60265e+06	2.9329		6.57235e+06	6.53768e+06	6.57352e+06	6.53914e+06	30.372	6.57235e+06	6.53768e+06	6.57291e+06	6.53825e+06	12.178
5.64757e+06	5.60073e+06	5.64871e+06	5.60218e+06	27.008	5.64913e+06	5.60222e+06	1.0204		6.57235e+06	6.53768e+06	6.57273e+06	6.53823e+06	42.137	6.57235e+06	6.53768e+06	6.57336e+06	6.53858e+06	-1.0868
5.64757e+06	5.60073e+06	5.64909e+06	5.60235e+06	11.488	5.64947e+06	5.60242e+06	-6.5531		6.57235e+06	6.53768e+06	6.5735e+06	6.53906e+06	26.751	6.57235e+06	6.53768e+06	6.57324e+06	6.53865e+06	18.814
5.64757e+06	5.60073e+06	5.64961e+06	5.60283e+06	8.2828	5.65023e+06	5.60321e+06	-2.2274		6.57235e+06	6.53768e+06	6.57286e+06	6.53835e+06	34.374	6.57235e+06	6.53768e+06	6.57283e+06	6.53814e+06	3.9752
5.64757e+06	5.60073e+06	5.64946e+06	5.60276e+06	12.137	5.64966e+06	5.60271e+06	0.877		6.57235e+06	6.53768e+06	6.57325e+06	6.53858e+06	10.315	6.57235e+06	6.53768e+06	6.57341e+06	6.53872e+06	8.4001
5.64757e+06	5.60073e+06	5.64863e+06	5.60191e+06	15.671	5.65034e+06	5.60345e+06	3.6316		6.57235e+06	6.53768e+06	6.57342e+06	6.53879e+06	14.259	6.57235e+06	6.53768e+06	6.57328e+06	6.53856e+06	4.9091
5.64757e+06	5.60073e+06	5.64981e+06	5.60301e+06	6.9275	5.64983e+06	5.6029e+06	1.1544		6.57235e+06	6.53768e+06	6.57314e+06	6.5388e+06	40.372	6.57235e+06	6.53768e+06	6.5736e+06	6.53899e+06	14.497
5.64757e+06	5.60073e+06	5.64971e+06	5.60286e+06	4.5186	5.64933e+06	5.60242e+06	9.5205		6.57235e+06	6.53768e+06	6.57355e+06	6.53878e+06	1.1066	6.57235e+06	6.53768e+06	6.57331e+06	6.53858e+06	3.6132
5.64757e+06	5.60073e+06	5.64831e+06	5.60141e+06	-1.01	5.64952e+06	5.60254e+06	-2.135		6.57235e+06	6.53768e+06	6.57255e+06	6.53807e+06	60.345	6.57235e+06	6.53768e+06	6.57278e+06	6.538e+06	-23.192
5.64757e+06	5.60073e+06	5.64803e+06	5.60132e+06	27.99	5.64913e+06	5.60218e+06	-2.2462		6.57235e+06	6.53768e+06	6.57344e+06	6.53864e+06	-3.6562	6.57235e+06	6.53768e+06	6.57248e+06	6.53783e+06	18.133
5.64757e+06	5.60073e+06	5.64846e+06	5.60163e+06	6.99	5.64957e+06	5.60265e+06	0.93293		6.57235e+06	6.53768e+06	6.57271e+06	6.53825e+06	47.072	6.57235e+06	6.53768e+06	6.57267e+06	6.53793e+06	-18.314
5.64757e+06	5.60073e+06	5.64877e+06	5.60184e+06	-2.01	5.64913e+06	5.60222e+06	1.0204		6.57235e+06	6.53768e+06	6.5729e+06	6.5382e+06	3.526	6.57235e+06	6.53768e+06	6.57336e+06	6.53847e+06	-17.821
5.64757e+06	5.60073e+06	5.64776e+06	5.6009e+06	1.99	5.64947e+06	5.60242e+06	-6.5531		6.57235e+06	6.53768e+06	6.57323e+06	6.53843e+06	-7.8947	6.57235e+06	6.53768e+06	6.57355e+06	6.53883e+06	6.5284
5.64757e+06	5.60073e+06	5.64846e+06	5.60174e+06	17.99	5.65023e+06	5.60321e+06	-2.2274		6.57235e+06	6.53768e+06	6.57364e+06	6.53899e+06	12.508	6.57235e+06	6.53768e+06	6.57455e+06	6.53976e+06	4.2532
5.64757e+06	5.60073e+06	5.64935e+06	5.6026e+06	10.03	5.64966e+06	5.60271e+06	4		6.57235e+06	6.53768e+06	6.5728e+06	6.53836e+06	43.995	6.57235e+06	6.53768e+06	6.57356e+06	6.53862e+06	-17.963
5.64757e+06	5.60073e+06	5.64909e+06	5.60229e+06	7.9599	5.65034e+06	5.60345e+06	3.6316		6.57235e+06	6.53768e+06	6.57383e+06	6.53918e+06	11.12	6.57235e+06	6.53768e+06	6.57372e+06	6.53901e+06	7.384
5.64757e+06	5.60073e+06	5.64851e+06	5.60169e+06	8.7448	5.64983e+06	5.6029e+06	1.1544		6.57235e+06	6.53768e+06	6.5732e+06	6.53859e+06	17.554	6.57235e+06	6.53768e+06	6.57364e+06	6.53897e+06	10.456
5.64757e+06	5.60073e+06	5.64898e+06	5.60215e+06	6.6759	5.64933e+06	5.60242e+06	1.5205		6.57235e+06	6.53768e+06	6.57333e+06	6.53869e+06	13.223	6.57235e+06	6.53768e+06	6.57287e+06	6.5381e+06	-13.143
5.64757e+06	5.60073e+06	5.6499e+06	5.60294e+06	0.052327	5.64952e+06	5.60254e+06	-2.135		6.57235e+06	6.53768e+06	6.57371e+06	6.53899e+06	6.6973	6.57235e+06	6.53768e+06	6.57302e+06	6.53826e+06	-5.1344
5.64757e+06	5.60073e+06	5.64995e+06	5.60329e+06	12.405	5.64913e+06	5.60218e+06	-2.2462		6.57235e+06	6.53768e+06	6.57298e+06	6.53819e+06	-13.742	6.57235e+06	6.53768e+06	6.57257e+06	6.53788e+06	-3.1289
5.64757e+06	5.60073e+06	5.6481e+06	5.60131e+06	15.57	5.64957e+06	5.60265e+06	0.93293		6.57235e+06	6.53768e+06	6.57376e+06	6.53918e+06	16.139	6.57235e+06	6.53768e+06	6.57285e+06	6.53808e+06	-14.256
5.64757e+06	5.60073e+06	5.64789e+06	5.60103e+06	0.28931	5.64913e+06	5.60222e+06	1.0204		6.57235e+06	6.53768e+06	6.57414e+06	6.53945e+06	9.1227	6.57235e+06	6.53768e+06	6.5735e+06	6.53882e+06	9.396
5.64757e+06	5.60073e+06	5.64988e+06	5.60316e+06	10.472	5.64947e+06	5.60242e+06	-6.5531		6.57235e+06	6.53768e+06	6.57351e+06	6.53889e+06	14.255	6.57235e+06	6.53768e+06	6.57438e+06	6.53964e+06	6.7113
5.64757e+06	5.60073e+06	5.64965e+06	5.60281e+06	5.4787	5.65023e+06	5.60321e+06	-2.2274		6.57235e+06	6.53768e+06	6.57402e+06	6.53916e+06	-2.2434	6.57235e+06	6.53768e+06	6.57343e+06	6.5387e+06	4.8522
5.64757e+06	5.60073e+06	5.6487e+06	5.60198e+06	15.99	5.64966e+06	5.60271e+06	0.03		6.57235e+06	6.53768e+06	6.57389e+06	6.53946e+06	23.841	6.57235e+06	6.53768e+06	6.57309e+06	6.53854e+06	23.648
5.64757e+06	5.60073e+06	5.64834e+06	5.6015e+06	5.99	5.65034e+06	5.60345e+06	3.6316		6.57235e+06	6.53768e+06	6.57306e+06	6.53859e+06	31.908	6.57235e+06	6.53768e+06	6.57449e+06	6.53973e+06	6.1142
5.64757e+06	5.60073e+06	5.64831e+06	5.60142e+06	-1.01	5.64837e+06	5.60151e+06	2.99		6.57235e+06	6.53768e+06	6.57282e+06	6.53837e+06	42.131	6.57235e+06	6.53768e+06	6.57336e+06	6.53866e+06	7.52
5.64757e+06	5.60073e+06	5.64849e+06	5.60163e+06	2.99	5.64828e+06	5.60125e+06	-30.01		6.57235e+06	6.53768e+06	6.5736e+06	6.53881e+06	-0.31003	6.57235e+06	6.53768e+06	6.57386e+06	6.53901e+06	-3.8572
5.64757e+06	5.60073e+06	5.64757e+06	5.60073e+06	-34.401	5.64758e+06	5.60073e+06	-13.01		6.57235e+06	6.53768e+06	6.57276e+06	6.53808e+06	7.5874	6.57235e+06	6.53768e+06	6.57333e+06	6.53842e+06	-21.208
5.64757e+06	5.60073e+06	5.64757e+06	5.60073e+06	65.063	5.64758e+06	5.60073e+06	-1.01		6.57235e+06	6.53768e+06	6.57278e+06	6.53813e+06	14.555	6.57235e+06	6.53768e+06	6.57338e+06	6.53862e+06	0.69016
5.64757e+06	5.60073e+06	5.64757e+06	5.60073e+06	53.7	5.64809e+06	5.60118e+06	-11.01		6.57235e+06	6.53768e+06	6.57354e+06	6.53891e+06	13.074	6.57235e+06	6.53768e+06	6.5734e+06	6.53853e+06	-14.435
5.64757e+06	5.60073e+06	5.64758e+06	5.60073e+06	11.99	5.64804e+06	5.60117e+06	1.99		6.57235e+06	6.53768e+06	6.57404e+06	6.53923e+06	1.1562	6.57235e+06	6.53768e+06	6.57338e+06	6.53867e+06	5.9013
5.64757e+06	5.60073e+06	5.64758e+06	5.60073e+06	-9.01	5.64793e+06	5.60101e+06	-23.01		6.57235e+06	6.53768e+06	6.57315e+06	6.53848e+06	10.621	6.57235e+06	6.53768e+06	6.57326e+06	6.53836e+06	-24.367
5.64757e+06	5.60073e+06	5.64856e+06	5.60073e+06	6.99	5.64758e+06	5.60172e+06	2.99		6.57235e+06	6.53768e+06	6.57252e+06	6.53784e+06	3.4606	6.57235e+06	6.53768e+06	6.57337e+06	6.53862e+06	2.2908
5.64757e+06	5.60073e+06	5.64758e+06	5.60073e+06	6.99	5.64787e+06	5.60103e+06	7.99		6.57235e+06	6.53768e+06	6.5737e+06	6.53932e+06	27.94	6.57235e+06	6.53768e+06	6.57377e+06	6.53919e+06	16.452
5.64757e+06	5.60073e+06	5.64758e+06	5.60073e+06	23.99	5.64835e+06	5.60154e+06	8.99		6.57235e+06	6.53768e+06	6.57328e+06	6.53862e+06	11.779	6.57235e+06	6.53768e+06	6.57327e+06	6.5386e+06	10.125
5.64757e+06	5.60073e+06	5.64758e+06	5.60073e+06	5.99	5.64802e+06	5.60113e+06	-4.01		6.57235e+06	6.53768e+06	6.57332e+06	6.53853e+06	-3.5359	6.57235e+06	6.53768e+06	6.5741e+06	6.53938e+06	7.5437
5.64757e+06	5.60073e+06	5.64758e+06	5.60073e+06	13.99					6.57235e+06	6.53768e+06	6.57287e+06	6.53825e+06	18.97	6.57235e+06	6.53768e+06	6.57343e+06	6.5386e+06	-7.5493
5.64757e+06	5.60073e+06	5.64823e+06	5.60144e+06	13.99					6.57235e+06	6.53768e+06	6.5732e+06	6.53832e+06	-22.45	6.57235e+06	6.53768e+06	6.57364e+06	6.53895e+06	8.8909
5.64757e+06	5.60073e+06	5.64814e+06	5.60137e+06	16.99					6.57235e+06	6.53768e+06	6.57317e+06	6.53866e+06	27.379	6.57235e+06	6.53768e+06	6.57355e+06	6.53871e+06	-5.9063
5.64757e+06	5.60073e+06	5.64839e+06	5.60164e+06	14.99					6.57235e+06	6.53768e+06	6.57311e+06	6.5387e+06	36.494	6.57235e+06	6.53768e+06	6.57418e+06	6.53951e+06	10.263
5.64757e+06	5.60073e+06	5.64758e+06	5.60073e+06	14.99					6.57235e+06	6.53768e+06	6.57343e+06	6.53849e+06	-23.156
5.64757e+06	5.60073e+06	5.64758e+06	5.60073e+06	5.99					6.57235e+06	6.53768e+06	6.57391e+06	6.53921e+06	8.5319
5.64757e+06	5.60073e+06	5.64758e+06	5.60073e+06	-9.01					6.57235e+06	6.53768e+06	6.57255e+06	6.53786e+06	0.078269
									6.57235e+06	6.53768e+06	6.57315e+06	6.53857e+06	20.224
									6.57235e+06	6.53768e+06	6.57291e+06	6.53821e+06	4.4398
									6.57235e+06	6.53768e+06	6.57381e+06	6.53918e+06	13.21
									6.57235e+06	6.53768e+06	6.57252e+06	6.53791e+06	33.349
									6.57235e+06	6.53768e+06	6.5731e+06	6.53834e+06	-2.8911
									6.57235e+06	6.53768e+06	6.5732e+06	6.53845e+06	-0.38816
									6.57235e+06	6.53768e+06	6.57285e+06	6.53817e+06	8.3465
									6.57235e+06	6.53768e+06	6.57331e+06	6.53868e+06	13.635
									6.57235e+06	6.53768e+06	6.57371e+06	6.53884e+06	-7.0642
									6.57235e+06	6.53768e+06	6.57282e+06	6.53826e+06	28.935
									6.57235e+06	6.53768e+06	6.57282e+06	6.53826e+06	28.379
									6.57235e+06	6.53768e+06	6.57322e+06	6.53848e+06	1.8941
									6.57235e+06	6.53768e+06	6.57273e+06	6.53817e+06	32.708
									6.57235e+06	6.53768e+06	6.57335e+06	6.53863e+06	5.3942
									6.57235e+06	6.53768e+06	6.57274e+06	6.53808e+06	13.072
									6.57235e+06	6.53768e+06	6.57313e+06	6.53835e+06	-7.3653
									6.57235e+06	6.53768e+06	6.57262e+06	6.5381e+06	46.885
									6.57235e+06	6.53768e+06	6.57383e+06	6.53924e+06	15.645
									6.57235e+06	6.53768e+06	6.57266e+06	6.53802e+06	18.645
									6.57235e+06	6.53768e+06	6.57299e+06	6.53831e+06	9.204

## Sheet: Experiment2
pair: Nud1-mTUR Bfa1-EYFP									pair: Nud1-mTUR Bfa1-EYFP
condition: Gal1-KIN4 oe									condition: Gal1-clb2DDB oe
P=0,53*10¯⁴									P=0,007
FL(bg)bb	FL(bg)ab	FL(D)bb	FL(D)ab	FRET (D) %	FL(DA)bb	FL(DA)ab	FRET(DA) %		FL(bg)bb	FL(bg)ab	FL(D)bb	FL(D)ab	FRET (D) %	FL(DA)bb	FL(DA)ab	FRET(DA) %
6.3542e+06	6.21437e+06	6.35553e+06	6.21553e+06	-8.624	6.21453e+06	6.21458e+06	30.214		5.74894e+06	5.65131e+06	5.75104e+06	5.6532e+06	-7.205	5.65231e+06	5.6522e+06	-7.809
6.3542e+06	6.21437e+06	6.35515e+06	6.21517e+06	-12.601	6.21484e+06	6.21484e+06	5.85089		5.74894e+06	5.65131e+06	5.75214e+06	5.65458e+06	5.6565	5.6515e+06	5.65149e+06	-1.6868
6.3542e+06	6.21437e+06	6.35502e+06	6.21541e+06	27.414	6.21507e+06	6.21525e+06	25.791		5.74894e+06	5.65131e+06	5.75142e+06	5.65371e+06	0.4725	5.65318e+06	5.65335e+06	11.8497
6.3542e+06	6.21437e+06	6.35479e+06	6.2151e+06	25.154	6.2152e+06	6.21532e+06	19.21		5.74894e+06	5.65131e+06	5.75128e+06	5.65356e+06	-0.4819	5.65263e+06	5.65266e+06	5.3264
6.3542e+06	6.21437e+06	6.35499e+06	6.21507e+06	-6.527	6.21492e+06	6.215e+06	20.21		5.74894e+06	5.65131e+06	5.75086e+06	5.65314e+06	-1.6054	5.65302e+06	5.65319e+06	13.0816
6.3542e+06	6.21437e+06	6.35515e+06	6.21509e+06	-27.076	6.21574e+06	6.21564e+06	-1.1851		5.74894e+06	5.65131e+06	5.75022e+06	5.65225e+06	-32.689	5652476	5.65254e+06	8.9467
6.3542e+06	6.21437e+06	6.35459e+06	6.21473e+06	-5.261	6.21523e+06	6.21519e+06	1.9321		5.74894e+06	5.65131e+06	5.75112e+06	5.65312e+06	-17.007	5.65373e+06	5.654e+06	13.65
6.3542e+06	6.21437e+06	6.35514e+06	6.21521e+06	-5.36	6.21564e+06	6.21556e+06	-0.3236		5.74894e+06	5.65131e+06	5.75102e+06	5.65344e+06	6.0173	5.65286e+06	5.6529e+06	6.65
6.3542e+06	6.21437e+06	6.35567e+06	6.21594e+06	12.7282	6.21622e+06	6.21606e+06	-3.2785		5.74894e+06	5.65131e+06	5.75012e+06	5.65232e+06	-13.385	5.65283e+06	5.65293e+06	9.65
6.3542e+06	6.21437e+06	6.35508e+06	6.21506e+06	-21.096	6.21613e+06	6.21602e+06	-0.3496		5.74894e+06	5.65131e+06	5.75023e+06	5652552	-0.6094	5.652e+06	5.65217e+06	23.65
6.3542e+06	6.21437e+06	6.35583e+06	6.21578e+06	-9.563	7.16142e+06	7.39967e+06	26.21		5.74894e+06	5.65131e+06	5.75081e+06	5.65327e+06	8.1054	5.65176e+06	5.65181e+06	12.65
6.3542e+06	6.21437e+06	6.35486e+06	6.21502e+06	5.50443	6.85102e+06	6.91479e+06	15.21		5.74894e+06	5.65131e+06	5.75135e+06	5.65375e+06	4.56832	5.65297e+06	5.6531e+06	10.65
6.3542e+06	6.21437e+06	6.35538e+06	6.21566e+06	15.0309	6.52837e+06	6.52766e+06	6.21		5.74894e+06	5.65131e+06	5.75105e+06	5.65345e+06	5.2813	5652879	5.65274e+06	-6.1514
6.3542e+06	6.21437e+06	6.35459e+06	6.21466e+06	-28.228	6.21537e+06	6.21526e+06	-5.249		5.74894e+06	5.65131e+06	5.7513e+06	5653513	-3.5098	5.65285e+06	5.65287e+06	4.63141
6.3542e+06	6.21437e+06	6.35494e+06	6.21493e+06	-25.999	6.21456e+06	6.21455e+06	0.8732		5.74894e+06	5.65131e+06	5.7494e+06	5.65193e+06	28.401	5.65325e+06	5.65301e+06	-10.83
6.3542e+06	6.21437e+06	6.3563e+06	6.21627e+06	-4.645	6.21625e+06	6.21641e+06	14.4097		5.74894e+06	5.65131e+06	5.75021e+06	5652475	-5.8128	5.65247e+06	5.65234e+06	-8.363
6.3542e+06	6.21437e+06	6.3574e+06	6.21764e+06	8.2165	6.21569e+06	6.21572e+06	7.8864		5.74894e+06	5.65131e+06	5.75116e+06	5.65353e+06	3.54164	5.65259e+06	5.65255e+06	0.6285
6.3542e+06	6.21437e+06	6.35668e+06	6.21677e+06	3.0325	6.21608e+06	6.21626e+06	15.6416		5.74894e+06	5.65131e+06	5.75144e+06	5.65386e+06	5.5135	5.65295e+06	5.65301e+06	6.65
6.3542e+06	6.21437e+06	6.35654e+06	6.21662e+06	2.0781	6.21554e+06	6.2156e+06	11.5067		5.74894e+06	5.65131e+06	5.75087e+06	5653181	0.5147	5.65278e+06	5.65283e+06	6.65
6.3542e+06	6.21437e+06	6.35613e+06	6.2162e+06	0.9546	6.21679e+06	6.21706e+06	16.21		5.74894e+06	5.65131e+06	5.75102e+06	5.65303e+06	-17.558	5.65218e+06	5.65214e+06	-0.35
6.3542e+06	6.21437e+06	6.35548e+06	6.21531e+06	-30.129	6.21592e+06	6.21597e+06	9.21		5.74894e+06	5.65131e+06	5.7501e+06	5.65253e+06	8.2454	5.6529e+06	5653097	14.65
6.3542e+06	6.21437e+06	6.35638e+06	6.21618e+06	-14.447	6.21589e+06	6.21599e+06	12.21		5.74894e+06	5.65131e+06	5.75145e+06	5.65349e+06	-11.576	5.65261e+06	5.65248e+06	-7.35
6.3542e+06	6.21437e+06	6.35628e+06	6.2165e+06	8.5773	6.21506e+06	6.21523e+06	26.21		5.74894e+06	5.65131e+06	5.75065e+06	5.65295e+06	-1.1919	5.65255e+06	5.65256e+06	4.65
6.3542e+06	6.21437e+06	6.35538e+06	6.21538e+06	-10.825	6.21482e+06	6.21487e+06	15.21		5.74894e+06	5.65131e+06	5.75039e+06	5.6529e+06	12.2924	5.65278e+06	5.65276e+06	1.65
6.3542e+06	6.21437e+06	6.35549e+06	6.21561e+06	1.9506	6.21603e+06	6.21616e+06	13.21		5.74894e+06	5.65131e+06	5.75007e+06	5652430	2.6303	5.65317e+06	5.65318e+06	4.65
6.3542e+06	6.21437e+06	6.35607e+06	6.21633e+06	10.6654	6.21594e+06	6.2158e+06	-3.5914		5.74894e+06	5.65131e+06	5.75053e+06	5.65275e+06	-7.458	5.65338e+06	5.65329e+06	-0.35
6.3542e+06	6.21437e+06	6.35662e+06	6.21681e+06	7.12832	6.21591e+06	6.21593e+06	7.19141		5.74894e+06	5.65131e+06				5.65263e+06	5.65271e+06	8.65
6.3542e+06	6.21437e+06	6.35631e+06	6.21652e+06	7.8413	6.21631e+06	6.21607e+06	-8.27		5.74894e+06	5.65131e+06				5.65218e+06	5.65222e+06	8.65
6.3542e+06	6.21437e+06	6.35656e+06	6.21657e+06	-0.9498	6.21553e+06	6.2154e+06	-5.803		5.74894e+06	5.65131e+06				5.65143e+06	5.65149e+06	34.65
6.3542e+06	6.21437e+06	6.35466e+06	6.21499e+06	30.961	6.21565e+06	6.21561e+06	3.1885		5.74894e+06	5.65131e+06				5.65246e+06	5.65259e+06	13.65
6.3542e+06	6.21437e+06	6.35547e+06	6.21554e+06	-3.2528	6.21601e+06	6.21607e+06	9.21		5.74894e+06	5.65131e+06				5.65195e+06	5.65195e+06	4.65
6.3542e+06	6.21437e+06	6.35642e+06	6.21659e+06	6.10164	6.21585e+06	6.21589e+06	9.21		5.74894e+06	5.65131e+06				5.65164e+06	5.6517e+06	18.65
6.3542e+06	6.21437e+06	6.3567e+06	6.21692e+06	8.0735	6.21524e+06	6.2152e+06	2.21		5.74894e+06	5.65131e+06				5.65174e+06	5.6518e+06	14.65
6.3542e+06	6.21437e+06	6.35613e+06	6.21624e+06	3.0747	6.21596e+06	6.21616e+06	17.21
6.3542e+06	6.21437e+06	6.35628e+06	6.21609e+06	-14.998	6.21567e+06	6.21554e+06	-4.79
6.3542e+06	6.21437e+06	6.35536e+06	6.21559e+06	10.8054	6.21561e+06	6.21562e+06	7.21
6.3542e+06	6.21437e+06	6.35671e+06	6.21655e+06	-9.016	6.21585e+06	6.21582e+06	4.21
6.3542e+06	6.21437e+06	6.35591e+06	6.21601e+06	1.3681	6.21585e+06	6.21582e+06	4.21
6.3542e+06	6.21437e+06	6.35565e+06	6.21596e+06	14.8524	6.21623e+06	6.21624e+06	7.21
6.3542e+06	6.21437e+06	6.35533e+06	6.21549e+06	5.1903	6.21644e+06	6.21635e+06	2.21
6.3542e+06	6.21437e+06	6.35579e+06	6.21581e+06	-4.898	6.21569e+06	6.21577e+06	11.21
6.3542e+06	6.21437e+06	6.35475e+06	6.21478e+06	-28.451	6.21524e+06	6.21529e+06	11.21
6.3542e+06	6.21437e+06	6.35489e+06	6.21501e+06	-1.3724	6.21552e+06	6.21565e+06	16.21
6.3542e+06	6.21437e+06	6.35514e+06	6.21506e+06	-30.584	6.21501e+06	6.21502e+06	7.21
6.3542e+06	6.21437e+06	6.35599e+06	6.21631e+06	13.8428	6.2147e+06	6.21476e+06	21.21
6.3542e+06	6.21437e+06	6.3546e+06	6.21474e+06	-2.8399	6.2148e+06	6.21486e+06	17.21
6.3542e+06	6.21437e+06	6.3548e+06	6.21497e+06	7.07282
6.3542e+06	6.21437e+06	6.35486e+06	6.21483e+06	-35.319
