# Supplementary material for: A FRET-based study reveals site-specific regulation of spindle position checkpoint proteins at yeast centrosomes
Source: eLife. 2016 May 9;5:e14029. doi: 10.7554/eLife.14029 (PMC4878874; doi:10.7554/eLife.14029)
Supplement: Figure 3—source data 2. — DOI: http://dx.doi.org/10.7554/eLife.14029.020 [file elife-14029-fig3-data2.xlsx]

## Sheet: Description
Description:
List of Abbreviations
Raw Mean Fluoresence Intensity before bleach (Donor/Aceptor): FL (DA) bb
Raw Mean Fluoresence Intensity before bleach (Donor only): FL (D) bb
Raw Mean Fluoresence Intensity before bleach (Background): FL (bg) bb
Raw Mean Fluoresence Intensity after bleach (Donor/Aceptor): FL (DA) ab
Raw Mean Fluoresence Intensity after bleach (Donor only): FL (D) ab
RawMean Fluoresence Intensity after bleach (Background): FL (bg) ab
Calculated FRET efficiency % for the indicated Donor/Acceptor pair) : FRET % (DA)
Calculated FRET efficiency % background for Donor only sample : FRET % (D)
daughter SPB: dSPB
mother SPB: mSPB
P-value for the indicated pair FRET % (DA) and FRET % (D) according to students t-test: P

## Sheet: Experiment 1
pair: Spc72-mTUR Bfa1-EYFP									pair: Spc72-mTUR Bfa1-eYFP
condition:Gal1-Kin4 overexpression									condition: Gal1-Clb2∆DB over expression
P=0,804379									P=0.00003
FL(bg)bb	FL(bg)ab	FL(DA)bb dSPB	FL(DA)ab dSPB	FRET(DA) % dSPB	FL(D)bb dSPB	FL(D)ab dSPB	FRET(D) %		FL(bg)bb	FL(bg)ab	FL(DA)bb dSPB	FL(DA)ab dSPB	FRET(DA) % dSPB	FL(D)bb dSPB	FL(D)ab dSPB	FRET(D) %
5733846	5699692	5.73406e+06	5.69983e+06	-46.31	5.73416e+06	5.70019e+06	41.504		6.45072e+06	5.99967e+06	6.45084e+06	5.99982e+06	24.729	6.45072e+06	5.99967e+06	12.187
5733846	5699692	5.73468e+06	5.70056e+06	8.7159	5.73428e+06	5.70015e+06	9.0212		6.45072e+06	5.99967e+06	6.45159e+06	6.00078e+06	22.92	6.45072e+06	5.99967e+06	-27.495
5733846	5699692	5.73463e+06	5.70047e+06	4.345	5.73416e+06	5.70012e+06	31.866		6.45072e+06	5.99967e+06	6.45125e+06	6.00045e+06	34.147	6.45072e+06	5.99967e+06	-1.7459
5733846	5699692	5.73452e+06	5.70031e+06	-3.3698	5.73458e+06	5.70026e+06	-22.971		6.45072e+06	5.99967e+06	6.45142e+06	6.00075e+06	36.481	6.45072e+06	5.99967e+06	-7.7701
5733846	5699692	5.73471e+06	5.70046e+06	-7.0206	5734340	5.70013e+06	-7.4789		6.45072e+06	5.99967e+06	6.45103e+06	6.00011e+06	31.958	6.45072e+06	5.99967e+06	24.716
5733846	5699692	5.73469e+06	5.70082e+06	29.956	5.73464e+06	5.70055e+06	12.677		6.45072e+06	5.99967e+06	6.4517e+06	6.0008e+06	14.77	6.45072e+06	5.99967e+06	15.31
5733846	5699692	5.73443e+06	5.70025e+06	0.98576	5.73425e+06	5.70044e+06	51.849		6.45072e+06	5.99967e+06	6.45091e+06	6e+06	44.782	6.45072e+06	5.99967e+06	-5.6773
5733846	5699692	5.73543e+06	5.70122e+06	1.9085	5.73441e+06	5.70024e+06	2.6467		6.45072e+06	5.99967e+06	6.45132e+06	6.00034e+06	11.983	6.45072e+06	5.99967e+06	-11.707
5733846	5699692	5.73433e+06	5.70019e+06	7.8147	5.73406e+06	5.69983e+06	-46.31		6.45072e+06	5.99967e+06	6.45102e+06	5.99997e+06	2.1867	6.45072e+06	5.99967e+06	11.101
5733846	5699692	5.73468e+06	5.70038e+06	-16.386	5.73468e+06	5.70056e+06	8.7159		6.45072e+06	5.99967e+06	6.45103e+06	6.00011e+06	30.522	6.45072e+06	5.99967e+06	25.313
5733846	5699692	5.73413e+06	5.69988e+06	-46.553	5.73463e+06	5.70047e+06	4.345		6.45072e+06	5.99967e+06	6.45153e+06	6.0005e+06	4.1861	6.45072e+06	5.99967e+06	-23.399
5733846	5699692	5.73447e+06	5.70033e+06	8.6749	5.73452e+06	5.70031e+06	-3.3698		6.45072e+06	5.99967e+06	6.45092e+06	5.9999e+06	15.274	6.45072e+06	5.99967e+06	-2.3401
5733846	5699692	5.73425e+06	5.70023e+06	29.891	5.73471e+06	5.70046e+06	-7.0206		6.45072e+06	5.99967e+06	6.45133e+06	6.00037e+06	14.998	6.45072e+06	5.99967e+06	-5.5212
5733846	5699692	5.73514e+06	5.70092e+06	-0.32811	5.73469e+06	5.70082e+06	29.956		6.45072e+06	5.99967e+06	6.45098e+06	6.00002e+06	28.458	6.45072e+06	5.99967e+06	14.519
5733846	5699692	5.73469e+06	5700559	7.763	5.73443e+06	5.70025e+06	0.98576		6.45072e+06	5.99967e+06	6.45133e+06	6.00051e+06	28.661	6.45072e+06	5.99967e+06	9.1538
5733846	5699692	5.73435e+06	5.70041e+06	34.64	5734698	5.70056e+06	6.5589		6.45072e+06	5.99967e+06	6.45155e+06	6.00051e+06	2.2153	6.45072e+06	5.99967e+06	12.081
5733846	5699692	5.73471e+06	5.70046e+06	-7.2577	5.73402e+06	5.69995e+06	36.901		6.45072e+06	5.99967e+06	6.45106e+06	5.99995e+06	-19.804	6.45072e+06	5.99967e+06	-2.2567
5733846	5699692	5.73451e+06	5.70011e+06	-53.831	5.73457e+06	5.70035e+06	-4.6624		6.45072e+06	5.99967e+06	6.4511e+06	6.00006e+06	5.3227	6.45072e+06	5.99967e+06	-6.4711
5733846	5699692	5.73493e+06	5.70049e+06	-30.756	5.73527e+06	5.70101e+06	-2.8599		6.45072e+06	5.99967e+06	6.45186e+06	6.00084e+06	4.1748	6.45072e+06	5.99967e+06	-0.64488
5733846	5699692	5.73431e+06	5.70004e+06	-29.125	5.73602e+06	5.70161e+06	-8.6775		6.45072e+06	5.99967e+06	6.45116e+06	6.00005e+06	-13.393	6.45072e+06	5.99967e+06	23.173
5733846	5699692	5.73435e+06	5.70015e+06	-4.9305	5.73449e+06	5.70057e+06	31.977		6.45072e+06	5.99967e+06	6.45093e+06	5.99995e+06	23.662	6.45072e+06	5.99967e+06	-5.2147
5733846	5699692	5.73459e+06	5700726	33.088	5.7344e+06	5.7002e+06	-3.1499		6.45072e+06	5.99967e+06	6.45094e+06	6.00005e+06	44.203	6.45072e+06	5.99967e+06	5.7471
5733846	5699692	5.73438e+06	5.70008e+06	-30.719	5.7348e+06	5.7006e+06	0.65973		6.45072e+06	5.99967e+06	6.45146e+06	6.00034e+06	-9.3153	6.45072e+06	5.99967e+06	19.333
5733846	5699692	5.73433e+06	5.70012e+06	-8.947	5.73473e+06	5.7008e+06	25.102		6.45072e+06	5.99967e+06	6.45133e+06	6.00032e+06	7.1684	6.45072e+06	5.99967e+06	11.8
5733846	5699692	5.73454e+06	5.70019e+06	-34.341	5.73457e+06	5.70035e+06	-4.9913		6.45072e+06	5.99967e+06	6.45082e+06	5.99986e+06	49.168	6.45072e+06	5.99967e+06	24.339
5733846	5699692	5.7354e+06	5.70124e+06	5.3024	5.7352e+06	5.70083e+06	-13.842		6.45072e+06	5.99967e+06	6.45163e+06	6.00046e+06	-13.724	6.45134e+06	6.00026e+06	-3.5005
5733846	5699692	5.7344e+06	5.70014e+06	-18.501	5.7346e+06	5.70021e+06	-41.215		6.45072e+06	5.99967e+06	6.45126e+06	6.00042e+06	29.746	6.45168e+06	5.99967e+06	4.6247
5733846	5699692	5.73408e+06	5.7e+06	30.282	5.73465e+06	5.70039e+06	-9.7903		6.45072e+06	5.99967e+06	6.45106e+06	6.0001e+06	24.024	6.45163e+06	5.99967e+06	4.1173
5733846	5699692	5.73509e+06	5.70086e+06	-1.0439	5.73497e+06	5.70056e+06	-23.701		6.45072e+06	5.99967e+06	6.45092e+06	6.0002e+06	63.897	6.45072e+06	5.99967e+06	-11.937
5733846	5699692	5.73415e+06	5.70002e+06	12.075	5.7353e+06	5.70095e+06	-9.9398		6.45072e+06	5.99967e+06	6.45094e+06	5.99992e+06	12.466	6.45072e+06	5.99967e+06	-1.9601
5733846	5699692	5.73508e+06	5.70076e+06	-9.7046	5.73446e+06	5.7003e+06	3.6833		6.45072e+06	5.99967e+06	6.45106e+06	6e+06	-0.52636	6.45167e+06	6.00036e+06	-36.025
5733846	5699692	5.73542e+06	5.70101e+06	-14.186	5.73468e+06	5.7006e+06	13.776		6.45072e+06	5.99967e+06	6.45084e+06	5.99995e+06	58.217	6.45167e+06	5.99967e+06	3.8773
5733846	5699692	5.73648e+06	5.70262e+06	15.34	5.73483e+06	5.70068e+06	6.1424		6.45072e+06	5.99967e+06	6.45172e+06	6.00084e+06	16.052	6.45159e+06	6.00053e+06	0.1555
5733846	5699692	5.73415e+06	5.7e+06	7.4052	5.73454e+06	5.70038e+06	4.2753		6.45072e+06	5.99967e+06	6.45217e+06	6.00094e+06	-12.821	6.45125e+06	6.00018e+06	-2.8033
5733846	5699692	5.73425e+06	5.70001e+06	-22.165	5.73488e+06	5.70054e+06	-16.775		6.45072e+06	5.99967e+06	6.4508e+06	5.99977e+06	14.253	6.45161e+06	6.00046e+06	-10.967
5733846	5699692	5734615	5.70059e+06	19.512	5.73509e+06	5.70063e+06	-26.974		6.45072e+06	5.99967e+06	6.45128e+06	6.00028e+06	10.88	6.45124e+06	6.00018e+06	-0.1618
5733846	5699692	5.73421e+06	5.70003e+06	-2.5047	5.73482e+06	5.70038e+06	-36.212		6.45072e+06	5.99967e+06	6.45102e+06	5.99993e+06	-16.081	6.45138e+06	6.00046e+06	18.042
5733846	5699692	5.73459e+06	5.70044e+06	4.8056	5.73487e+06	5.70033e+06	-55.49		6.45072e+06	5.99967e+06	6.45165e+06	6.00074e+06	14.274	6.4511e+06	6.00001e+06	-9.764
5733846	5699692	5.73486e+06	5.70101e+06	28.276	5.73458e+06	5.70018e+06	-45.95		6.45072e+06	5.99967e+06	6.4516e+06	6.00057e+06	2.9687	6.45111e+06	6.00015e+06	21.643
5733846	5699692	5.73511e+06	5.70102e+06	10.01	5.73492e+06	5.70063e+06	-9.9107		6.45072e+06	5.99967e+06	6.45111e+06	6.00029e+06	39.456	6.45157e+06	6.00053e+06	2.4995
5733846	5699692	5.73472e+06	5.70051e+06	-1.6776	5.73441e+06	5.70021e+06	-2.5655		6.45072e+06	5.99967e+06	6.45113e+06	6.00027e+06	33.742	6.45136e+06	6.00011e+06	-43.934
5733846	5699692	5735148	5.70114e+06	15.34	5.7347e+06	5.70057e+06	8.0532		6.45072e+06	5.99967e+06	6.45138e+06	6.00057e+06	27.77	6.45117e+06	6.00024e+06	3.8927
5733846	5699692	5.73407e+06	5.69992e+06	5.5474	5.73464e+06	5.70036e+06	-13.439		6.45072e+06	5.99967e+06	6.45107e+06	6.00005e+06	9.4207	6.45147e+06	6.00057e+06	18.914
5733846	5699692	5.7348e+06	5.70046e+06	-4.5297	5.73455e+06	5.7002e+06	-32.594		6.45072e+06	5.99967e+06	6.45127e+06	6.00039e+06	25.559	6.45072e+06	5.99967e+06	-0.9567
5733846	5699692	5.73449e+06	5.70019e+06	-10.413	5.73416e+06	5.70019e+06	41.504		6.45072e+06	5.99967e+06	6.45141e+06	6.00049e+06	16.642
5733846	5699692	5.73468e+06	5.70039e+06	-0.16289	5.73428e+06	5.70015e+06	9.0212		6.45072e+06	5.99967e+06	6.45072e+06	5.99967e+06	1.5215
5733846	5699692	5.73494e+06	5.70062e+06	1.7612	5.73416e+06	5.70012e+06	31.866		6.45072e+06	5.99967e+06	6.45128e+06	6.00022e+06	-0.9109
5733846	5699692	5.73395e+06	5.69984e+06	47	5.73458e+06	5.70026e+06	-22.971		6.45072e+06	5.99967e+06	6.45072e+06	5.99967e+06	-7.7886
5733846	5699692	5.73436e+06	5.70011e+06	-4.7569	5734340	5.70013e+06	-7.4789		6.45072e+06	5.99967e+06	6.45072e+06	5.99967e+06	23.881
5733846	5699692	5.73433e+06	5.70039e+06	49.406	5.73464e+06	5.70055e+06	12.677		6.45072e+06	5.99967e+06	6.45111e+06	6.00041e+06	48.5
5733846	5699692	5.73459e+06	5.70072e+06	46.264	5.73425e+06	5.70044e+06	51.849		6.45072e+06	5.99967e+06	6.45151e+06	5.99967e+06	28.259
5733846	5699692	5.73481e+06	5.70057e+06	8.4827	5.73441e+06	5.70024e+06	2.6467		6.45072e+06	5.99967e+06	6.45072e+06	5.99967e+06	3.9812
5733846	5699692	5.73471e+06	5.70039e+06	-5.1053	5.73432e+06	5.70017e+06	21.503
5733846	5699692	5.73505e+06	5.7007e+06	-0.02067	5.7348e+06	5.70073e+06	26.457
5733846	5699692	5.73457e+06	5.70016e+06	-37	5.73418e+06	5.6999e+06	-37.076
5733846	5699692	5.73423e+06	5.69989e+06	-79	5.7345e+06	5.70019e+06	-12.948
5733846	5699692	5.73503e+06	5.70072e+06	3	5.73453e+06	5.70031e+06	7.7999
5733846	5699692	5.73441e+06	5.69997e+06	-86	5.73466e+06	5.70053e+06	21.8
5733846	5699692	5.73489e+06	5.70061e+06	6	5.73419e+06	5.69994e+06	-18.668
5733846	5699692	5.73415e+06	5.69994e+06	-2	5.73457e+06	5.70015e+06	-40.586
5733846	5699692	5.73422e+06	5.70038e+06	64	5.73407e+06	5.69989e+06	10.568
5733846	5699692	5.73415e+06	5.7e+06	21	5.73467e+06	5.7005e+06	17.164
5733846	5699692	5.73453e+06	5.7003e+06	7	5.73495e+06	5.70064e+06	2.8198
5733846	5699692	5.73431e+06	5.70004e+06	-13
5733846	5699692	5.73412e+06	5.69993e+06	5
5733846	5699692	5.73444e+06	5.70033e+06	26
5733846	5699692	5.73485e+06	5.70077e+06	26
5733846	5699692	5.73416e+06	5.70018e+06	54
5733846	5699692	5735234	5.70096e+06	9
5733846	5699692	5.73494e+06	5.70058e+06	-4
5733846	5699692	5.73416e+06	5.70009e+06	40
5733846	5699692	5.73399e+06	5.69978e+06	-43
5733846	5699692	5.73511e+06	5.70089e+06	13
5733846	5699692	5.73391e+06	5.69973e+06	-23
5733846	5699692	5.73499e+06	5.70065e+06	0
5733846	5699692	5.7344e+06	5.70018e+06	5
5733846	5699692	5734359	5.7002e+06	18
5733846	5699692	5.73439e+06	5.70021e+06	13

## Sheet: Experiment2
pair: Spc72-mTUR Bfa1-EYFP									pair: Spc72-mTUR Bfa1-EYFP
condition: Gal1-KIN4 oe									condition: Gal1-clb2DDB oe
P=0,527									P=0,003
FL(bg)bb	FL(bg)ab	FL(D)bb	FL(D)ab	FRET (D) %	FL(DA)bb	FL(DA)ab	FRET(DA) %		FL(bg)bb	FL(bg)ab	FL(D)bb	FL(D)ab	FRET (D) %	FL(DA)bb	FL(DA)ab	FRET(DA) %
4.76095e+06	4.6695e+06	5342710	5271934	-6.60812	5.23509e+06	5451740	17.6558		5.86861e+06	5.72115e+06	5.86905e+06	5.72154e+06	-2.135	5.72148e+06	5.72152e+06	20.495
4.76095e+06	4.6695e+06	5160704	5075407	-8.52392	5.60855e+06	5718197	0.415596		5.86861e+06	5.72115e+06	5.86903e+06	5.72153e+06	-0.881	5.72213e+06	5.72222e+06	18.2768
4.76095e+06	4.6695e+06	5538936	5533383	-0.0968082	5.62868e+06	5756687	1.73382		5.86861e+06	5.72115e+06	5.86928e+06	5.72173e+06	-5.244	5.72199e+06	5.722e+06	11.4088
4.76095e+06	4.6695e+06	5057714	4954791	-14.0611	5.87838e+06	5921337	-6.60858		5.86861e+06	5.72115e+06	5.86927e+06	5.72204e+06	36.679	5.7215e+06	5.72148e+06	4.2447
4.76095e+06	4.6695e+06	5031115	4909504	-22.6063	5.39852e+06	5471081	-0.987443		5.86861e+06	5.72115e+06	5.86932e+06	5.72169e+06	-20.89	5.72138e+06	5.72135e+06	-2.192
4.76095e+06	4.6695e+06	5086303	5103009	14.9089	5.62308e+06	5555621	-17.6533		5.86861e+06	5.72115e+06	5.86932e+06	5.7218e+06	0.8841	5.72153e+06	5.72156e+06	18.7104
4.76095e+06	4.6695e+06	5909284	5782580	-13.2072	5.32026e+06	5346390	-6.17928		5.86861e+06	5.72115e+06	5.86929e+06	5.72178e+06	2.01	5.72145e+06	5.72153e+06	31.099
4.76095e+06	4.6695e+06	5512119	5557140	5.33462	5.79555e+06	5666621	-22.97		5.86861e+06	5.72115e+06	5.86935e+06	5.72183e+06	2.01	5.72191e+06	5.72202e+06	23.01
4.76095e+06	4.6695e+06	5002478	5037304	24.2923	5.93006e+06	5815778	-20.0098		5.86861e+06	5.72115e+06	5.86896e+06	5.72154e+06	20.01	5.72221e+06	5.72209e+06	-1.99
4.76095e+06	4.6695e+06	5019935	4957704	0.0984905	5.59324e+06	5532981	-17.0187		5.86861e+06	5.72115e+06	5.86893e+06	5.72142e+06	-4.99	5.72198e+06	5.72207e+06	20.01
4.76095e+06	4.6695e+06	5569289	5551944	-1.64223	5.22114e+06	5270562	-1.81729		5.86861e+06	5.72115e+06	5.86961e+06	5.72201e+06	-4.99	5.72162e+06	5.72174e+06	31.01
4.76095e+06	4.6695e+06	5412886	5433307	4.60655	5.10578e+06	5135766	-3.60962		5.86861e+06	5.72115e+06	5.86926e+06	5.72173e+06	-0.99	5.72227e+06	5.72223e+06	6.01
4.76095e+06	4.6695e+06	4929211	4860718	1.96591	5.22109e+06	5296800	2.02846		5.86861e+06	5.72115e+06	5.86954e+06	5.72203e+06	5.01	5.72218e+06	5.72234e+06	23.01
4.76095e+06	4.6695e+06	5132400	5165372	15.0515	5.15525e+06	5228279	3.02857		5.86861e+06	5.72115e+06	5.86941e+06	5.72192e+06	7.01	5.72228e+06	5.72228e+06	9.4738
4.76095e+06	4.6695e+06				5.37564e+06	5278840	-25.9254		5.86861e+06	5.72115e+06	5.86873e+06	5.72135e+06	52.01	5.72213e+06	5.72241e+06	32.32
4.76095e+06	4.6695e+06				5.54815e+06	5585139	-5.99989		5.86861e+06	5.72115e+06	5.86936e+06	5.72183e+06	1.01	5.72253e+06	5.7225e+06	7.0997
4.76095e+06	4.6695e+06				5.33808e+06	5344444	-9.09742		5.86861e+06	5.72115e+06	5.86897e+06	5.72138e+06	-45.99	5.72198e+06	5.72199e+06	11.01
4.76095e+06	4.6695e+06				4.92764e+06	5074000	26.1426		5.86861e+06	5.72115e+06	5.86903e+06	5.72144e+06	-33.99	5.72154e+06	5.72155e+06	12.01
4.76095e+06	4.6695e+06				5.05751e+06	5129080	5.53298		5.86861e+06	5.72115e+06	5.86889e+06	5.72134e+06	-40.99	5.72154e+06	5.7217e+06	40.01
4.76095e+06	4.6695e+06				5.04058e+06	5047746	-8.14629		5.86861e+06	5.72115e+06	5.86928e+06	5.72181e+06	9.01	5.72152e+06	5.72164e+06	35.01
4.76095e+06	4.6695e+06				5.76731e+06	5631517	-24.1552
4.76095e+06	4.6695e+06				5.61107e+06	5434545	-33.1136
4.76095e+06	4.6695e+06				5.54308e+06	5533927	-11.0984
4.76095e+06	4.6695e+06				5.49285e+06	5552348	-3.30105
4.76095e+06	4.6695e+06				4.80786e+06	4804633	-12.4243
4.76095e+06	4.6695e+06				4.89774e+06	4946366	7.52129
4.76095e+06	4.6695e+06				5.19911e+06	5181512	-13.477
4.76095e+06	4.6695e+06				4.91699e+06	4882942	-25.9897
4.76095e+06	4.6695e+06				5.11908e+06	5204865	5.98333
4.76095e+06	4.6695e+06				4.76201e+06	4908934	51.3224
4.76095e+06	4.6695e+06				5.21632e+06	5214388	-10.3953
4.76095e+06	4.6695e+06				5.04279e+06	5177595	16.4912
4.76095e+06	4.6695e+06				5.18949e+06	5247817	0.0459109
4.76095e+06	4.6695e+06				4.79599e+06	4860032	23.5741
4.76095e+06	4.6695e+06				4.85059e+06	4884478	5.72129
