# Supplementary material for: A FRET-based study reveals site-specific regulation of spindle position checkpoint proteins at yeast centrosomes
Source: eLife. 2016 May 9;5:e14029. doi: 10.7554/eLife.14029 (PMC4878874; doi:10.7554/eLife.14029)
Supplement: Figure 3—source data 3. — DOI: http://dx.doi.org/10.7554/eLife.14029.021 [file elife-14029-fig3-data3.xlsx]

## Sheet: Description
Description:
List of Abbreviations
Raw Mean Fluoresence Intensity before bleach (Donor/Aceptor): FL (DA) bb
Raw Mean Fluoresence Intensity before bleach (Donor only): FL (D) bb
Raw Mean Fluoresence Intensity before bleach (Background): FL (bg) bb
Raw Mean Fluoresence Intensity after bleach (Donor/Aceptor): FL (DA) ab
Raw Mean Fluoresence Intensity after bleach (Donor only): FL (D) ab
RawMean Fluoresence Intensity after bleach (Background): FL (bg) ab
Calculated FRET efficiency % for the indicated Donor/Acceptor pair) : FRET % (DA)
Calculated FRET efficiency % background for Donor only sample : FRET % (D)
daughter SPB: dSPB
mother SPB: mSPB
P-value for the indicated pair FRET % (DA) and FRET % (D) according to students t-test: P

## Sheet: Experiment 1
pair: Spc72-mTUR Bfa1-EYFP									pair: Spc72-mTUR Bfa1-eYFP											pair: Spc72-mTUR Bfa1-eYFP
condition:Gal1-Kin4 overexpression									condition:Gal1-Kin4 overexpression in bmh1∆											condition: bmh1∆
p:0.804379451									p:0.01 E-07											p:0,009 E-3
FL(bg)bb	FL(bg)ab	FL(DA)bb dSPB	FL(DA)ab dSPB	FRET(DA) % dSPB	FL(D)bb dSPB	FL(D)ab dSPB	FRET(D) %		FL(bg)bb	FL(bg)ab	FL(DA)bb dSPB	FL(DA)ab dSPB	FRET(DA) % dSPB	FL(D)bb dSPB	FL(D)ab dSPB	FRET(D) %				FL(bg)bb	FL(bg)ab	FL(DA)bb dSPB	FL(DA)ab dSPB	FRET(DA) % dSPB	FL(D)bb dSPB	FL(D)ab dSPB	FRET(D) %
5733846	5699692	5.73406e+06	5.69983e+06	-46.31	5.73416e+06	5.70019e+06	41.504		5.98314e+06	5.92231e+06	5.98416e+06	5.92347e+06	21.344	5.98392e+06	5.92304e+06	2.8555				6.18159e+06	5.98347e+06	6.18274e+06	5.9847e+06	14.669	6.18217e+06	5.98399e+06	-5.7441
5733846	5699692	5.73468e+06	5.70056e+06	8.7159	5.73428e+06	5.70015e+06	9.0212		5.98314e+06	5.92231e+06	5.98368e+06	5.92292e+06	21.597	5.9842e+06	5.9233e+06	2.7613				6.18159e+06	5.98347e+06	6.18262e+06	5.98459e+06	16.251	6.18197e+06	5.98398e+06	32.85
5733846	5699692	5.73463e+06	5.70047e+06	4.345	5.73416e+06	5.70012e+06	31.866		5.98314e+06	5.92231e+06	5.98363e+06	5.92328e+06	58.749	5.98412e+06	5.9234e+06	19.825				6.18159e+06	5.98347e+06	6.1828e+06	5.98481e+06	17.884	6.18231e+06	5.98414e+06	0.037474
5733846	5699692	5.73452e+06	5.70031e+06	-3.3698	5.73458e+06	5.70026e+06	-22.971		5.98314e+06	5.92231e+06	5.98335e+06	5.92253e+06	12.571	5.98392e+06	5.92302e+06	0.030517				6.18159e+06	5.98347e+06	6.18257e+06	5.98452e+06	15.556	6.18235e+06	5.9841e+06	-12.982
5733846	5699692	5.73471e+06	5.70046e+06	-7.0206	5734340	5.70013e+06	-7.4789		5.98314e+06	5.92231e+06	5.98395e+06	5.92316e+06	14.193	5.9843e+06	5.92331e+06	-5.8153				6.18159e+06	5.98347e+06	6.18199e+06	5.984e+06	31.309	6.18364e+06	5.98541e+06	3.0492
5733846	5699692	5.73469e+06	5.70082e+06	29.956	5.73464e+06	5.70055e+06	12.677		5.98314e+06	5.92231e+06	5.98397e+06	5.92323e+06	20.103	5.98456e+06	5.92339e+06	-21.45				6.18159e+06	5.98347e+06	6.18217e+06	5.98428e+06	36.342	6.18224e+06	5.98398e+06	-20.484
5733846	5699692	5.73443e+06	5.70025e+06	0.98576	5.73425e+06	5.70044e+06	51.849		5.98314e+06	5.92231e+06	5.98376e+06	5.92312e+06	33.113	5.98497e+06	5.92411e+06	8.3234				6.18159e+06	5.98347e+06	6.18278e+06	5.98475e+06	15.769	6.18227e+06	5.98417e+06	11.377
5733846	5699692	5.73543e+06	5.70122e+06	1.9085	5.73441e+06	5.70024e+06	2.6467		5.98314e+06	5.92231e+06	5.98372e+06	5.92298e+06	23.197	5.98506e+06	5.92409e+06	2.3281				6.18159e+06	5.98347e+06	6.18276e+06	5.98472e+06	14.563	6.18257e+06	5.98348e+06	27
5733846	5699692	5.73433e+06	5.70019e+06	7.8147	5.73406e+06	5.69983e+06	-46.31		5.98314e+06	5.92231e+06	5.98344e+06	5.92278e+06	45.669	5.98506e+06	5.92409e+06	2.3281				6.18159e+06	5.98347e+06	6.18259e+06	5.9848e+06	33.34	6.18159e+06	5.98348e+06	15
5733846	5699692	5.73468e+06	5.70038e+06	-16.386	5.73468e+06	5.70056e+06	8.7159		5.98314e+06	5.92231e+06	5.98405e+06	5.92317e+06	4.5157	5.98402e+06	5.92306e+06	-7.8309				6.18159e+06	5.98347e+06	6.18263e+06	5.98444e+06	1.5653	6.18226e+06	5.98426e+06	24
5733846	5699692	5.73413e+06	5.69988e+06	-46.553	5.73463e+06	5.70047e+06	4.345		5.98314e+06	5.92231e+06	5.98376e+06	5.92302e+06	22.024	5.98366e+06	5.92293e+06	25.158				6.18159e+06	5.98347e+06	6.182e+06	5.98384e+06	-2.4495	6.18227e+06	5.98417e+06	11
5733846	5699692	5.73447e+06	5.70033e+06	8.6749	5.73452e+06	5.70031e+06	-3.3698		5.98314e+06	5.92231e+06	5.98372e+06	5.92288e+06	7.9662	5.98374e+06	5.92286e+06	-0.03778				6.18159e+06	5.98347e+06	6.18242e+06	5.98429e+06	7.0136	6.18159e+06	5.98348e+06	-9
5733846	5699692	5.73425e+06	5.70023e+06	29.891	5.73471e+06	5.70046e+06	-7.0206		5.98314e+06	5.92231e+06	5.98318e+06	5.92235e+06	13.091	5.98396e+06	5.92319e+06	16.034				6.18159e+06	5.98347e+06	6.18211e+06	5.98399e+06	7.2996	6.18159e+06	5.98435e+06	-6
5733846	5699692	5.73514e+06	5.70092e+06	-0.32811	5.73469e+06	5.70082e+06	29.956		5.98314e+06	5.92231e+06	5.98381e+06	5.92296e+06	5.7503	5.98412e+06	5.92301e+06	-30.052				6.18159e+06	5.98347e+06	6.18207e+06	5.98414e+06	36.368	6.18159e+06	5.98348e+06	-3
5733846	5699692	5.73469e+06	5700559	7.763	5.73443e+06	5.70025e+06	0.98576		5.98314e+06	5.92231e+06	5.98338e+06	5.92257e+06	15.632	5.98356e+06	5.92274e+06	12.531				6.18159e+06	5.98347e+06	6.18239e+06	5.98432e+06	13.636	6.18159e+06	5.98348e+06	15
5733846	5699692	5.73435e+06	5.70041e+06	34.64	5734698	5.70056e+06	6.5589		5.98314e+06	5.92231e+06	5.98344e+06	5.92264e+06	19.261	5.98409e+06	5.92295e+06	-37.08				6.18159e+06	5.98347e+06	6.18281e+06	5.9848e+06	16.742	6.18159e+06	5.98348e+06	-3
5733846	5699692	5.73471e+06	5.70046e+06	-7.2577	5.73402e+06	5.69995e+06	36.901		5.98314e+06	5.92231e+06	5.98328e+06	5.92249e+06	30.551	5.98382e+06	5.92276e+06	-41.08				6.18159e+06	5.98347e+06	6.18224e+06	5.98422e+06	20.941	6.18159e+06	5.98348e+06	5
5733846	5699692	5.73451e+06	5.70011e+06	-53.831	5.73457e+06	5.70035e+06	-4.6624		5.98314e+06	5.92231e+06	5.9837e+06	5.92274e+06	-21.476	5.98314e+06	5.9231e+06	-22.08				6.18159e+06	5.98347e+06	6.18172e+06	5.98365e+06	33.852	6.18159e+06	5.98425e+06	-40
5733846	5699692	5.73493e+06	5.70049e+06	-30.756	5.73527e+06	5.70101e+06	-2.8599		5.98314e+06	5.92231e+06	5.98405e+06	5.92351e+06	34.099	5.98358e+06	5.92274e+06	7.92				6.18159e+06	5.98347e+06	6.18208e+06	5.98406e+06	24.527	6.18209e+06	5.98389e+06	-14
5733846	5699692	5.73431e+06	5.70004e+06	-29.125	5.73602e+06	5.70161e+06	-8.6775		5.98314e+06	5.92231e+06	5.98367e+06	5.92288e+06	16.151	5.98314e+06	5.92231e+06	16.92				6.18159e+06	5.98347e+06	6.1818e+06	5.98385e+06	53.648	6.18159e+06	5.98348e+06	7
5733846	5699692	5.73435e+06	5.70015e+06	-4.9305	5.73449e+06	5.70057e+06	31.977		5.98314e+06	5.92231e+06	5.98371e+06	5.92301e+06	27.92	5.98386e+06	5.92294e+06	-5.08				6.18159e+06	5.98347e+06	6.18241e+06	5.98413e+06	-16.645	6.18159e+06	5.98348e+06	-5
5733846	5699692	5.73459e+06	5700726	33.088	5.7344e+06	5.7002e+06	-3.1499		5.98314e+06	5.92231e+06	5.98376e+06	5.92296e+06	14.92	5.98377e+06	5.92295e+06	9.92				6.18159e+06	5.98347e+06	6.1824e+06	5.98411e+06	-19.187	6.18159e+06	5.98348e+06	-4
5733846	5699692	5.73438e+06	5.70008e+06	-30.719	5.7348e+06	5.7006e+06	0.65973		5.98314e+06	5.92231e+06	5.98389e+06	5.92298e+06	-3.08	5.98398e+06	5.92313e+06	7.92				6.18159e+06	5.98347e+06	6.18208e+06	5.98406e+06	24.527	6.18159e+06	5.98348e+06	8
5733846	5699692	5.73433e+06	5.70012e+06	-8.947	5.73473e+06	5.7008e+06	25.102		5.98314e+06	5.92231e+06	5.98376e+06	5.92296e+06	14.92	5.98347e+06	5.92254e+06	-35.08				6.18159e+06	5.98347e+06	6.18177e+06	5.98367e+06	15.897	6.18226e+06	5.98416e+06	11
5733846	5699692	5.73454e+06	5.70019e+06	-34.341	5.73457e+06	5.70035e+06	-4.9913		5.98314e+06	5.92231e+06	5.98395e+06	5.92325e+06	23.92	5.98374e+06	5.92279e+06	-15.08				6.18159e+06	5.98347e+06	6.18238e+06	5.98433e+06	15.309	6.18159e+06	5.98348e+06	15
5733846	5699692	5.7354e+06	5.70124e+06	5.3024	5.7352e+06	5.70083e+06	-13.842		5.98314e+06	5.92231e+06	5.98314e+06	5.92231e+06	9.92	5.98403e+06	5.92324e+06	14.92				6.18159e+06	5.98347e+06	6.18203e+06	5.98386e+06	-4.285	6.18159e+06	5.98348e+06	-1
5733846	5699692	5.7344e+06	5.70014e+06	-18.501	5.7346e+06	5.70021e+06	-41.215		5.98314e+06	5.92231e+06	5.98314e+06	5.92231e+06	12.92	5.98345e+06	5.92268e+06	24.92				6.18159e+06	5.98347e+06	6.18221e+06	5.98409e+06	7.1127	6.18252e+06	5.98415e+06	-29
5733846	5699692	5.73408e+06	5.7e+06	30.282	5.73465e+06	5.70039e+06	-9.7903		5.98314e+06	5.92231e+06	5.98338e+06	5.92277e+06	56.92	5.98397e+06	5.92319e+06	15.92				6.18159e+06	5.98347e+06	6.18201e+06	5.98393e+06	15.859	6.18159e+06	5.98348e+06	4
5733846	5699692	5.73509e+06	5.70086e+06	-1.0439	5.73497e+06	5.70056e+06	-23.701		5.98314e+06	5.92231e+06	5.98364e+06	5.92277e+06	2.92	5.98395e+06	5.92313e+06	9.92				6.18159e+06	5.98347e+06	6.18209e+06	5.98404e+06	19.796	6.18209e+06	5.98406e+06	23
5733846	5699692	5.73415e+06	5.70002e+06	12.075	5.7353e+06	5.70095e+06	-9.9398		5.98314e+06	5.92231e+06	5.98314e+06	5.92231e+06	27.92	5.98365e+06	5.92269e+06	-22.08				6.18159e+06	5.98347e+06	6.18243e+06	5.9842e+06	-7	6.18255e+06	5.98348e+06	20
5733846	5699692	5.73508e+06	5.70076e+06	-9.7046	5.73446e+06	5.7003e+06	3.6833		5.98314e+06	5.92231e+06	5.98364e+06	5.923e+06	37.92	5.98314e+06	5.92231e+06	-10.08				6.18159e+06	5.98347e+06	6.18223e+06	5.98412e+06	9	6.18209e+06	5.98387e+06	-20
5733846	5699692	5.73542e+06	5.70101e+06	-14.186	5.73468e+06	5.7006e+06	13.776		5.98314e+06	5.92231e+06	5.98328e+06	5.92253e+06	42.92	5.98378e+06	5.92281e+06	-20.08				6.18159e+06	5.98347e+06	6.18159e+06	5.98348e+06	15	6.18159e+06	5.98348e+06	4
5733846	5699692	5.73648e+06	5.70262e+06	15.34	5.73483e+06	5.70068e+06	6.1424		5.98314e+06	5.92231e+06	5.98405e+06	5.92317e+06	4.92	5.98317e+06	5.92233e+06	-37.08				6.18159e+06	5.98347e+06	6.18159e+06	5.98348e+06	19	6.18255e+06	5.98348e+06	15
5733846	5699692	5.73415e+06	5.7e+06	7.4052	5.73454e+06	5.70038e+06	4.2753		5.98314e+06	5.92231e+06	5.98314e+06	5.92231e+06	2.92	5.98352e+06	5.92258e+06	-32.08				6.18159e+06	5.98347e+06	6.18191e+06	5.98381e+06	11	6.18159e+06	5.98447e+06	0
5733846	5699692	5.73425e+06	5.70001e+06	-22.165	5.73488e+06	5.70054e+06	-16.775		5.98314e+06	5.92231e+06	5.98391e+06	5.92315e+06	17.92	5.98374e+06	5.92285e+06	-1.08				6.18159e+06	5.98347e+06	6.18178e+06	5.98373e+06	35	6.18217e+06	5.98391e+06	-26
5733846	5699692	5734615	5.70059e+06	19.512	5.73509e+06	5.70063e+06	-26.974		5.98314e+06	5.92231e+06	5.98377e+06	5.9232e+06	38.92	5.98398e+06	5.92297e+06	-18.08				6.18159e+06	5.98347e+06	6.18213e+06	5.98425e+06	39	6.18159e+06	5.98348e+06	-8
5733846	5699692	5.73421e+06	5.70003e+06	-2.5047	5.73482e+06	5.70038e+06	-36.212		5.98314e+06	5.92231e+06	5.98399e+06	5.92304e+06	-7.08							6.18159e+06	5.98347e+06	6.18218e+06	5.98422e+06	29	6.18236e+06	5.98405e+06	-24
5733846	5699692	5.73459e+06	5.70044e+06	4.8056	5.73487e+06	5.70033e+06	-55.49		5.98314e+06	5.92231e+06	5.98351e+06	5.9227e+06	15.92							6.18159e+06	5.98347e+06	6.18159e+06	5.98442e+06	3	6.18159e+06	5.98348e+06	-1
5733846	5699692	5.73486e+06	5.70101e+06	28.276	5.73458e+06	5.70018e+06	-45.95		5.98314e+06	5.92231e+06	5.98394e+06	5.92328e+06	27.92							6.18159e+06	5.98347e+06	6.18189e+06	5.98416e+06	64	6.18159e+06	5.98348e+06	-2
5733846	5699692	5.73511e+06	5.70102e+06	10.01	5.73492e+06	5.70063e+06	-9.9107													6.18159e+06	5.98347e+06	6.18159e+06	5.98348e+06	23	6.18159e+06	5.98348e+06	-21
5733846	5699692	5.73472e+06	5.70051e+06	-1.6776	5.73441e+06	5.70021e+06	-2.5655													6.18159e+06	5.98347e+06	6.18248e+06	5.98348e+06	20	6.18214e+06	5.98417e+06	29
5733846	5699692	5735148	5.70114e+06	15.34	5.7347e+06	5.70057e+06	8.0532													6.18159e+06	5.98347e+06				6.18159e+06	5.98348e+06	19
5733846	5699692	5.73407e+06	5.69992e+06	5.5474	5.73464e+06	5.70036e+06	-13.439													6.18159e+06	5.98347e+06				6.18159e+06	5.98348e+06	19
5733846	5699692	5.7348e+06	5.70046e+06	-4.5297	5.73455e+06	5.7002e+06	-32.594													6.18159e+06	5.98347e+06				6.18159e+06	5.98442e+06	-19
5733846	5699692	5.73449e+06	5.70019e+06	-10.413	5.73416e+06	5.70019e+06	41.504													6.18159e+06	5.98347e+06				6.18159e+06	5.98348e+06	-7
5733846	5699692	5.73468e+06	5.70039e+06	-0.16289	5.73428e+06	5.70015e+06	9.0212													6.18159e+06	5.98347e+06				6.18159e+06	5.98348e+06	-13
5733846	5699692	5.73494e+06	5.70062e+06	1.7612	5.73416e+06	5.70012e+06	31.866													6.18159e+06	5.98347e+06				6.18209e+06	5.98406e+06	23
5733846	5699692	5.73395e+06	5.69984e+06	47	5.73458e+06	5.70026e+06	-22.971
5733846	5699692	5.73436e+06	5.70011e+06	-4.7569	5734340	5.70013e+06	-7.4789
5733846	5699692	5.73433e+06	5.70039e+06	49.406	5.73464e+06	5.70055e+06	12.677
5733846	5699692	5.73459e+06	5.70072e+06	46.264	5.73425e+06	5.70044e+06	51.849
5733846	5699692	5.73481e+06	5.70057e+06	8.4827	5.73441e+06	5.70024e+06	2.6467
5733846	5699692	5.73471e+06	5.70039e+06	-5.1053	5.73432e+06	5.70017e+06	21.503
5733846	5699692	5.73505e+06	5.7007e+06	-0.02067	5.7348e+06	5.70073e+06	26.457
5733846	5699692	5.73457e+06	5.70016e+06	-37	5.73418e+06	5.6999e+06	-37.076
5733846	5699692	5.73423e+06	5.69989e+06	-79	5.7345e+06	5.70019e+06	-12.948
5733846	5699692	5.73503e+06	5.70072e+06	3	5.73453e+06	5.70031e+06	7.7999
5733846	5699692	5.73441e+06	5.69997e+06	-86	5.73466e+06	5.70053e+06	21.8
5733846	5699692	5.73489e+06	5.70061e+06	6	5.73419e+06	5.69994e+06	-18.668
5733846	5699692	5.73415e+06	5.69994e+06	-2	5.73457e+06	5.70015e+06	-40.586
5733846	5699692	5.73422e+06	5.70038e+06	64	5.73407e+06	5.69989e+06	10.568
5733846	5699692	5.73415e+06	5.7e+06	21	5.73467e+06	5.7005e+06	17.164
5733846	5699692	5.73453e+06	5.7003e+06	7	5.73495e+06	5.70064e+06	2.8198
5733846	5699692	5.73431e+06	5.70004e+06	-13
5733846	5699692	5.73412e+06	5.69993e+06	5
5733846	5699692	5.73444e+06	5.70033e+06	26
5733846	5699692	5.73485e+06	5.70077e+06	26
5733846	5699692	5.73416e+06	5.70018e+06	54
5733846	5699692	5735234	5.70096e+06	9
5733846	5699692	5.73494e+06	5.70058e+06	-4
5733846	5699692	5.73416e+06	5.70009e+06	40
5733846	5699692	5.73399e+06	5.69978e+06	-43
5733846	5699692	5.73511e+06	5.70089e+06	13
5733846	5699692	5.73391e+06	5.69973e+06	-23
5733846	5699692	5.73499e+06	5.70065e+06	0
5733846	5699692	5.7344e+06	5.70018e+06	5
5733846	5699692	5734359	5.7002e+06	18
5733846	5699692	5.73439e+06	5.70021e+06	13

## Sheet: Experiment2
pair: Spc72-mTUR Bfa1-EYFP									pair: Spc72-mTUR Bfa1-EYFP
condition: bmh1∆ Gal1-KIN4 oe									condition: bmh1∆ cycling cells
P=0,00005									P=0,00016
FL(bg)bb	FL(bg)ab	FL(D)bb	FL(D)ab	FRET (D) %	FL(DA)bb	FL(DA)ab	FRET(DA) %		FL(bg)bb	FL(bg)ab	FL(D)bb	FL(D)ab	FRET (D) %	FL(DA)bb	FL(DA)ab	FRET(DA) %
5.17204e+06	5.12044e+06	5.12178e+06	5.12364e+06	-2.094	5.1728e+06	5.12139e+06	31.427		5329.62	5132.62	10835.6	10388.6	-4.75647	6575	6303	-6.4082
5.17204e+06	5.12044e+06	5.1214e+06	5.12198e+06	-6.071	5.17323e+06	5.12168e+06	15.9863		5329.62	5132.62	10576.6	10181.6	-3.92157	6314	6162	4.37158
5.17204e+06	5.12044e+06	5.12126e+06	5.12218e+06	33.944	5.17281e+06	5.12132e+06	23.869		5329.62	5132.62	10970.6	10516.6	-4.7734	5994	5775	-3.42479
5.17204e+06	5.12044e+06	5.12104e+06	5.12254e+06	31.684	5.17328e+06	5.12168e+06	11.7912		5329.62	5132.62	10640.6	10358.6	-1.62648	5822	5718	15.8873
5.17204e+06	5.12044e+06	5.12124e+06	5.1249e+06	0.003	5.1731e+06	5.12139e+06	1.087		5329.62	5132.62	11075.6	10712.6	-2.97491	6443	6103	-14.7366
5.17204e+06	5.12044e+06	5.1214e+06	5.1274e+06	-20.546	5.17321e+06	5.12169e+06	18.5926		5329.62	5132.62	10511.6	9999.62	-6.47216	6367	6279	9.50823
5.17204e+06	5.12044e+06	5.12084e+06	5.12228e+06	1.269	5.17273e+06	5.12112e+06	10.6744		5329.62	5132.62	12527.6	11776.6	-8.33835	5498	5608	64.5806
5.17204e+06	5.12044e+06	5.12139e+06	5.1213e+06	1.17	5.17224e+06	5.12065e+06	14.7246		5329.62	5132.62	10878.6	10550.6	-2.41787	6493	6230	-6.01435
5.17204e+06	5.12044e+06	5.12191e+06	5.12348e+06	19.2582	5.1733e+06	5.12185e+06	22.74		5329.62	5132.62	5762	5478	-25.19	6248	6119	6.89393
5.17204e+06	5.12044e+06	5.12133e+06	5.12156e+06	-14.566	5.1723e+06	5.12081e+06	38.74		5329.62	5132.62	6657	6226	-21.4016	5339	5248	91.8743
5.17204e+06	5.12044e+06	5.12207e+06	5.12308e+06	-3.033	5.17368e+06	5.12207e+06	11.74		5329.62	5132.62	5506	5368	25.0664	5867	6131	46.175
5.17204e+06	5.12044e+06	5.1211e+06	5.12117e+06	12.0344	5.17252e+06	5.12101e+06	26.302		5329.62	5132.62	5868	5771	15.6648	5685	5742	41.6821
5.17204e+06	5.12044e+06	5.12162e+06	5.12099e+06	21.5609	5.17248e+06	5.12107e+06	42.007		5329.62	5132.62	5723	5424	-35.0064	5597	5537	33.8794
5.17204e+06	5.12044e+06	5.12084e+06	5.1228e+06	-21.698	5.17241e+06	5.12092e+06	34.46		5329.62	5132.62	6235	5996	-4.86463	5518	5454	41.3847
5.17204e+06	5.12044e+06	5.12093e+06	5.12237e+06	-45.585	5.1732e+06	5.12166e+06	17.2465		5329.62	5132.62	6823	6540	-6.11067	5737	5564	5.5636
5.17204e+06	5.12044e+06	5.12119e+06	5.12118e+06	-19.469	5.17409e+06	5.1226e+06	17.6135		5329.62	5132.62	5628	5372	-24.6475	6592	6387	-0.637768
5.17204e+06	5.12044e+06	5.12099e+06	5.12166e+06	-21.921	5.17301e+06	5.12151e+06	21.74		5329.62	5132.62	5490	5287	-3.88664	5766	5621	10.6476
5.17204e+06	5.12044e+06	5.12114e+06	5.12142e+06	5.1576	5.1729e+06	5.12118e+06	-4.26		5329.62	5132.62	5587	5334	-27.8088	5482	5278	-4.81513
5.17204e+06	5.12044e+06	5.12139e+06	5.12232e+06	-24.054	5.17282e+06	5.12132e+06	22.74		5329.62	5132.62	6256	6008	-5.82607	6695	6452	-3.4865
5.17204e+06	5.12044e+06	5.12223e+06	5.1211e+06	20.3728	5.17321e+06	5.12174e+06	22.74		5329.62	5132.62	5677	5415	-23.019	5992	5576	-49.3939
5.17204e+06	5.12044e+06	5.12085e+06	5.12129e+06	3.6901	5.17271e+06	5.12122e+06	25.74		5329.62	5132.62	6376	6090	-9.29625	5858	5753	14.8297
5.17204e+06	5.12044e+06	5.12104e+06	5.12219e+06	13.6028	5.17213e+06	5.12052e+06	-11.26		5329.62	5132.62	5558	5332	-14.5455	5868	5861	26.0855
5.17204e+06	5.12044e+06	5.1211e+06	5.1216e+06	-28.789	5.17334e+06	5.12205e+06	31.74		5329.62	5132.62	6286	5974	-13.6681	6493	6421	9.70214
5.17204e+06	5.12044e+06				5.17416e+06	5.12272e+06	19.74		5329.62	5132.62	5505	5269	-28.5976	5979	5957	21.2282
5.17204e+06	5.12044e+06				5.17363e+06	5.12162e+06	-23.26		5329.62	5132.62	5767	5645	14.6377	5799	5653	9.80062
5.17204e+06	5.12044e+06				5.17249e+06	5.12094e+06	21.74		5329.62	5132.62	6076	5919	5.08663	5615	5519	26.1404
5.17204e+06	5.12044e+06				5.17365e+06	5.12219e+06	20.74		5329.62	5132.62	5812	5618	0.618079	5655	5603	30.8265
5.17204e+06	5.12044e+06				5.17257e+06	5.12103e+06	22.74		5329.62	5132.62	6359	6152	-0.980993	5813	5605	-2.32866
5.17204e+06	5.12044e+06				5.1723e+06	5.12076e+06	29.74		5329.62	5132.62	6597	6366	-2.75666	5736	5406	-48.6511
5.17204e+06	5.12044e+06				5.17277e+06	5.12108e+06	-2.26		5329.62	5132.62	6332	5867	-36.4936	5716	5666	27.5603
5.17204e+06	5.12044e+06				5.17385e+06	5.12224e+06	11.74		5329.62	5132.62	6673	6207	-25.0378	6136	5844	-13.3544
5.17204e+06	5.12044e+06				5.17304e+06	5.12144e+06	11.74		5329.62	5132.62	7678	7355	-5.66961	6224	5906	-15.6457
5.17204e+06	5.12044e+06				5.17339e+06	5.12206e+06	28.74		5329.62	5132.62	6213	5850	-23.1399	6966	6836	3.93337
5.17204e+06	5.12044e+06				5.17353e+06	5.12185e+06	6.74		5329.62	5132.62	5913	5598	-25.3559	6484	6470	13.6835
5.17204e+06	5.12044e+06				5.17349e+06	5.12173e+06	-0.26		5329.62	5132.62	6360	6254	8.11504	6267	5857	-29.4047
5.17204e+06	5.12044e+06				5.1734e+06	5.12221e+06	35.74		5329.62	5132.62	5737	5435	-34.7251	5792	5554	-9.73005
5.17204e+06	5.12044e+06				5.17256e+06	5.121e+06	18.74		5329.62	5132.62	5938	5808	9.92041	6226	6150	11.8934
5.17204e+06	5.12044e+06				5.17303e+06	5.12137e+06	5.74		5329.62	5132.62				6202	6064	6.33472
									5329.62	5132.62				7423	7494	11.3493
									5329.62	5132.62				5446	5272	16.5022
									5329.62	5132.62				6947	6606	-9.77348
									5329.62	5132.62				6414	6280	5.49079
									5329.62	5132.62				5624	5466	11.6985
									5329.62	5132.62				6509	6333	1.74945
									5329.62	5132.62				6427	6192	-3.58702
									5329.62	5132.62				6115	5949	3.79727
									5329.62	5132.62				6474	6235	-3.80996
									5329.62	5132.62				6133	5995	6.84157

## Sheet: Experiment3
pair: Spc72-mTUR Bfa1-EYFP									pair: Spc72-mTUR Bfa1-EYFP
condition: bmh1∆ Gal1-KIN4 oe									condition: bmh1∆ cycling cells
									P=0,0000089
									FL(bg)bb	FL(bg)ab	FL(D)bb	FL(D)ab	FRET (D) %	FL(DA)bb	FL(DA)ab	FRET(DA) %
									5482.44	5283.11	5530	5320	-28.9157	5564	5675	79.1891
									5482.44	5283.11	5748	5534	-5.84588	5515	5378	65.6909
									5482.44	5283.11	5833	5682	12.117	6896	6786	5.94411
									5482.44	5283.11	6191	5977	-2.11369	5588	5526	56.5416
									5482.44	5283.11	6106	5817	-16.795	6268	6330	24.9629
									5482.44	5283.11	6607	6058	-45.1247	5970	5722	-11.0886
									5482.44	5283.11	5991	5725	-15.0867	6037	5774	-12.9697
									5482.44	5283.11	6907	6689	-1.32775	6756	6707	10.5579
									5482.44	5283.11	6083	5789	-18.7129	6455	6362	9.85582
									5482.44	5283.11	6588	6226	-17.2519	6393	6071	-15.569
									5482.44	5283.11	6618	6313	-10.26	5810	5628	5.02577
									5482.44	5283.11	6115	5826	-16.5166	5565	5503	62.4558
									5482.44	5283.11	6307	6016	-12.5076	5569	5409	31.2445
									5482.44	5283.11	5931	5719	-2.90594	5853	5559	-34.3133
									5482.44	5283.11	6001	5734	-15.0074	7560	7370	0.447237
									5482.44	5283.11	5866	5654	-3.41522	5810	5628	5.02577
									5482.44	5283.11	5895	5689	-1.64249	6384	6270	8.6467
									5482.44	5283.11	5831	5604	-8.62188	5718	5457	-35.4633
									5482.44	5283.11	6274	6028	-6.26492	5921	5873	25.6545
									5482.44	5283.11	6083	5804	-15.2944	5682	5787	60.3969
									5482.44	5283.11	6064	5795	-13.6097	6197	6108	13.3755
									5482.44	5283.11	6152	5907	-7.31968	5883	5644	-10.9914
									5482.44	5283.11	6764	6382	-16.6229	5671	5674	51.7624
									5482.44	5283.11	5941	5679	-15.8294	6271	6101	3.58647
									5482.44	5283.11	6257	6040	-2.33412	5694	5673	45.7395
									5482.44	5283.11	6370	6087	-10.4077	7050	6682	-12.0572
									5482.44	5283.11	6300	6137	4.25504	5506	5314	23.741
									5482.44	5283.11	6293	5891	-33.3394	6189	5914	-11.9937
									5482.44	5283.11	6540	6342	0.125918	5841	5925	44.1406
									5482.44	5283.11	6113	5852	-10.8398	6556	6499	11.7061
									5482.44	5283.11	5861	5582	-26.6543	6084	5878	-1.12066
									5482.44	5283.11	6586	6048	-44.2766	6509	6494	15.223
									5482.44	5283.11	5816	5635	5.20998	6268	5991	-10.9716
									5482.44	5283.11				6001	5904	16.4817
									5482.44	5283.11				5747	5617	20.7654
									5482.44	5283.11				6255	5985	-10.0681
									5482.44	5283.11				6159	6066	13.5822
									5482.44	5283.11				6067	6080	26.6453
									5482.44	5283.11				5862	5793	25.5611
									5482.44	5283.11				6149	5937	-1.93713
									5482.44	5283.11				6158	5839	-21.5271
									5482.44	5283.11				6405	6002	-28.3308
									5482.44	5283.11				6100	5949	7.25847
									5482.44	5283.11				7091	6957	3.90309
									5482.44	5283.11				6388	6202	1.45103
									5482.44	5283.11				6555	6275	-8.13263
									5482.44	5283.11				6803	6675	5.12493
									5482.44	5283.11				7425	7334	5.28226
									5482.44	5283.11				6613	6302	-10.9597
									5482.44	5283.11				7296	7076	-1.1527
