# Supplementary material for: A FRET-based study reveals site-specific regulation of spindle position checkpoint proteins at yeast centrosomes
Source: eLife. 2016 May 9;5:e14029. doi: 10.7554/eLife.14029 (PMC4878874; doi:10.7554/eLife.14029)
Supplement: Figure 3—source data 4. — DOI: http://dx.doi.org/10.7554/eLife.14029.022 [file elife-14029-fig3-data4.xlsx]

## Sheet: Description
Description:
List of Abbreviations
Raw Mean Fluoresence Intensity before bleach (Donor/Aceptor): FL (DA) bb
Raw Mean Fluoresence Intensity before bleach (Donor only): FL (D) bb
Raw Mean Fluoresence Intensity before bleach (Background): FL (bg) bb
Raw Mean Fluoresence Intensity after bleach (Donor/Aceptor): FL (DA) ab
Raw Mean Fluoresence Intensity after bleach (Donor only): FL (D) ab
RawMean Fluoresence Intensity after bleach (Background): FL (bg) ab
Calculated FRET efficiency % for the indicated Donor/Acceptor pair) : FRET % (DA)
Calculated FRET efficiency % background for Donor only sample : FRET % (D)
daughter SPB: dSPB
mother SPB: mSPB
P-value for the indicated pair FRET % (DA) and FRET % (D) according to students t-test: P

## Sheet: Experiment 1
pair: Nud1-mTUR Bfa1-EYFP									pair: Nud1-mTUR Bfa1-eYFP											pair: Nud1-mTUR Bfa1-eYFP
condition:Gal1-Kin4 overexpression									condition:Gal1-Kin4 overexpression in bmh1∆											condition: bmh1∆
p:	9.44138e-06								p:	1.44522e-05										p:	1.7589e-05
FL(bg)bb	FL(bg)ab	FL(DA)bb dSPB	FL(DA)ab dSPB	FRET(DA) % dSPB	FL(D)bb dSPB	FL(D)ab dSPB	FRET(D) %		FL(bg)bb	FL(bg)ab	FL(DA)bb dSPB	FL(DA)ab dSPB	FRET(DA) % dSPB	FL(D)bb dSPB	FL(D)ab dSPB	FRET(D) %				FL(bg)bb	FL(bg)ab	FL(DA)bb dSPB	FL(DA)ab dSPB	FRET(DA) % dSPB	FL(D)bb dSPB	FL(D)ab dSPB	FRET(D) %
5.64757e+06	5.60073e+06	5.64948e+06	5.6025e+06	-2.0519	5.64983e+06	5.6029e+06	1.1544		4.84156e+06	4.7789e+06	4.84301e+06	4.78024e+06	-3.673	4.8424e+06	4.77977e+06	8.1014				5.62339e+06	5.41962e+06	5.62359e+06	5.42007e+06	57.3	5.62524e+06	5.42127e+06	-9.7781
5.64757e+06	5.60073e+06	5.64976e+06	5.60297e+06	7.6296	5.64933e+06	5.60242e+06	1.5205		4.84156e+06	4.7789e+06	4.84242e+06	4.7797e+06	-3.2912	4.84228e+06	4.77944e+06	-29.709				5.62339e+06	5.41962e+06	5.62363e+06	5.41989e+06	12.061	5.62401e+06	5.42022e+06	-2.0578
5.64757e+06	5.60073e+06	5.6495e+06	5.60284e+06	14.058	5.64952e+06	5.60254e+06	-2.135		4.84156e+06	4.7789e+06	4.84281e+06	4.7801e+06	-0.28424	4.84205e+06	4.77939e+06	4.4125				5.62339e+06	5.41962e+06	5.62453e+06	5.42086e+06	10.591	5623964	5.42019e+06	0.77729
5.64757e+06	5.60073e+06	5.6489e+06	5.60226e+06	18.865	5.64913e+06	5.60218e+06	-2.2462		4.84156e+06	4.7789e+06	4.8421e+06	4.77954e+06	18.943	4.84243e+06	4.77988e+06	15.782				5.62339e+06	5.41962e+06	5.62413e+06	5.42037e+06	3.7702	5.62421e+06	5.4205e+06	9.7571
5.64757e+06	5.60073e+06	5.64884e+06	5.60218e+06	17.871	5.64957e+06	5.60265e+06	2.9329		4.84156e+06	4.7789e+06	4.84288e+06	4.78051e+06	22.644	4.84281e+06	4.78012e+06	2.8481				5.62339e+06	5.41962e+06	5.62469e+06	5.42086e+06	-1.701	5.62407e+06	5.42017e+06	-23.117
5.64757e+06	5.60073e+06	5.64871e+06	5.60218e+06	27.008	5.64913e+06	5.60222e+06	1.0204		4.84156e+06	4.7789e+06	4.84224e+06	4.77962e+06	10.19	4.84255e+06	4.77975e+06	-12.62				5.62339e+06	5.41962e+06	5.625e+06	5.4212e+06	1.2685	5.62463e+06	5.42105e+06	16.519
5.64757e+06	5.60073e+06	5.64909e+06	5.60235e+06	11.488	5.64947e+06	5.60242e+06	-6.5531		4.84156e+06	4.7789e+06	4.84326e+06	4.78072e+06	11.267	4.84271e+06	4.77997e+06	-3.1467				5.62339e+06	5.41962e+06	5.62412e+06	5.42054e+06	22.363	5.62435e+06	5.42072e+06	15.205
5.64757e+06	5.60073e+06	5.64961e+06	5.60283e+06	8.2828	5.65023e+06	5.60321e+06	-2.2274		4.84156e+06	4.7789e+06	4.84258e+06	4.77983e+06	-5.2741	4.84216e+06	4.77953e+06	9.0795				5.62339e+06	5.41962e+06	5.62426e+06	5420639	16.949	5.62421e+06	5.42043e+06	2.0185
5.64757e+06	5.60073e+06	5.64946e+06	5.60276e+06	12.137	5.64966e+06	5.60271e+06	0.877		4.84156e+06	4.7789e+06	4.84237e+06	4.77962e+06	-8.4043	4.84272e+06	4.78012e+06	9.7363				5.62339e+06	5.41962e+06	5.62474e+06	5.42109e+06	10.926	5.62595e+06	5.42232e+06	7.8317
5.64757e+06	5.60073e+06	5.64863e+06	5.60191e+06	15.671	5.65034e+06	5.60345e+06	3.6316		4.84156e+06	4.7789e+06	4.84208e+06	4.77947e+06	13.757	4.844e+06	4.78105e+06	-8.7424				5.62339e+06	5.41962e+06	5.62399e+06	5.42029e+06	11.96	5.62474e+06	5.42081e+06	-10.653
5.64757e+06	5.60073e+06	5.64981e+06	5.60301e+06	6.9275	5.64983e+06	5.6029e+06	1.1544		4.84156e+06	4.7789e+06	4.84226e+06	4.77957e+06	-0.60213	4.84214e+06	4779357	-23.311				5.62339e+06	5.41962e+06	5.6235e+06	5.41976e+06	17.256	5.62441e+06	5.42066e+06	4.3868
5.64757e+06	5.60073e+06	5.64971e+06	5.60286e+06	4.5186	5.64933e+06	5.60242e+06	9.5205		4.84156e+06	4.7789e+06	4.84299e+06	4.78029e+06	1.8399	4.84251e+06	4.7797e+06	-14.235				5.62339e+06	5.41962e+06	5.62399e+06	5.42024e+06	4.4413	5.62401e+06	5420338	16.374
5.64757e+06	5.60073e+06	5.64831e+06	5.60141e+06	-1.01	5.64952e+06	5.60254e+06	-2.135		4.84156e+06	4.7789e+06	4.84275e+06	4.78017e+06	11.226	4.84227e+06	4.77961e+06	3.3793				5.62339e+06	5.41962e+06	5.62617e+06	5422445	4.5249	5.626e+06	5.42215e+06	0.0093459
5.64757e+06	5.60073e+06	5.64803e+06	5.60132e+06	27.99	5.64913e+06	5.60218e+06	-2.2462		4.84156e+06	4.7789e+06	4.84216e+06	4.77955e+06	11.877	4.84203e+06	4.77926e+06	-27.191				5.62339e+06	5.41962e+06	5.62406e+06	5.42045e+06	22.363	5.62488e+06	5.4208e+06	-23.276
5.64757e+06	5.60073e+06	5.64846e+06	5.60163e+06	6.99	5.64957e+06	5.60265e+06	0.93293		4.84156e+06	4.7789e+06	4.84247e+06	4.78002e+06	23.571	4.84178e+06	4.77908e+06	-16.196				5.62339e+06	5.41962e+06	5.6241e+06	5.4205e+06	21.092	5.62371e+06	5.41999e+06	15.077
5.64757e+06	5.60073e+06	5.64877e+06	5.60184e+06	-2.01	5.64913e+06	5.60222e+06	1.0204		4.84156e+06	4.7789e+06	4.84319e+06	4.78039e+06	-4.3505	4.84276e+06	4.78009e+06	4.2951				5.62339e+06	5.41962e+06	5.62411e+06	5.42043e+06	13.623	5.62472e+06	5.42084e+06	-5.7392
5.64757e+06	5.60073e+06	5.64776e+06	5.6009e+06	1.99	5.64947e+06	5.60242e+06	-6.5531		4.84156e+06	4.7789e+06	4.84328e+06	4.78077e+06	13.081	4.84246e+06	4.77959e+06	-27.118				5.62339e+06	5.41962e+06	5.62431e+06	5.42049e+06	-2.3378	5.62429e+06	5.42045e+06	-6.418
5.64757e+06	5.60073e+06	5.64846e+06	5.60174e+06	17.99	5.65023e+06	5.60321e+06	-2.2274		4.84156e+06	4.7789e+06	4.84223e+06	4.77964e+06	14.998	4.84196e+06	4.77939e+06	22.666				5.62339e+06	5.41962e+06	5.62421e+06	5.42066e+06	23.959	5.62405e+06	5.42035e+06	12.273
5.64757e+06	5.60073e+06	5.64935e+06	5.6026e+06	10.03	5.64966e+06	5.60271e+06	4		4.84156e+06	4.7789e+06	4.84257e+06	4.78005e+06	16.824	4.84222e+06	4.77968e+06	18.67				5.62339e+06	5.41962e+06	5.62507e+06	5.42152e+06	14.54	5.62474e+06	5.42068e+06	-24.975
5.64757e+06	5.60073e+06	5.64909e+06	5.60229e+06	7.9599	5.65034e+06	5.60345e+06	3.6316		4.84156e+06	4.7789e+06	4842770	4.78039e+06	23.456	4.84283e+06	4.78019e+06	5.8185				5.62339e+06	5.41962e+06	5.62362e+06	5.41995e+06	31.395	5.62455e+06	5.42094e+06	14.663
5.64757e+06	5.60073e+06	5.64851e+06	5.60169e+06	8.7448	5.64983e+06	5.6029e+06	1.1544		4.84156e+06	4.7789e+06	4.84244e+06	4.77989e+06	15.988	4.8426e+06	4.77988e+06	-1.5649				5.62339e+06	5.41962e+06	5.62415e+06	5.42054e+06	20.298	5.62429e+06	5.42045e+06	-6.9
5.64757e+06	5.60073e+06	5.64898e+06	5.60215e+06	6.6759	5.64933e+06	5.60242e+06	1.5205		4.84156e+06	4.7789e+06	4.842e+06	4.77952e+06	33.476	4.84288e+06	4.78001e+06	-14.962				5.62339e+06	5.41962e+06	5.62418e+06	5.42031e+06	-11.889	5.62405e+06	5.42035e+06	12.1
5.64757e+06	5.60073e+06	5.6499e+06	5.60294e+06	0.052327	5.64952e+06	5.60254e+06	-2.135		4.84156e+06	4.7789e+06	4.84253e+06	4.77992e+06	9.8863	4.84276e+06	4.77993e+06	-11.857				5.62339e+06	5.41962e+06	5.62386e+06	5.42015e+06	12.951	5.62339e+06	5.41962e+06	-24.9
5.64757e+06	5.60073e+06	5.64995e+06	5.60329e+06	12.405	5.64913e+06	5.60218e+06	-2.2462		4.84156e+06	4.7789e+06	4842774	4.78024e+06	14.27	4.8427e+06	4.77999e+06	-0.97294				5.62339e+06	5.41962e+06	5623820	5.41999e+06	-15.676	5.62339e+06	5.41962e+06	15.1
5.64757e+06	5.60073e+06	5.6481e+06	5.60131e+06	15.57	5.64957e+06	5.60265e+06	0.93293		4.84156e+06	4.7789e+06	4.8427e+06	4.78009e+06	8.2514	4.84275e+06	4.77985e+06	-21.205				5.62339e+06	5.41962e+06	5.62438e+06	5.42074e+06	14.919	5.62339e+06	5.4206e+06	-14.9
5.64757e+06	5.60073e+06	5.64789e+06	5.60103e+06	0.28931	5.64913e+06	5.60222e+06	1.0204		4.84156e+06	4.7789e+06	4.84238e+06	4.7798e+06	13.471	4.84259e+06	4.77984e+06	-5.2192				5.62339e+06	5.41962e+06	5.62357e+06	5.41987e+06	27.603	5.6236e+06	5.41982e+06	-1.9
5.64757e+06	5.60073e+06	5.64988e+06	5.60316e+06	10.472	5.64947e+06	5.60242e+06	-6.5531		4.84156e+06	4.7789e+06	4.84178e+06	4.77916e+06	19.021	4.84262e+06	4.77985e+06	-6.5846				5.62339e+06	5.41962e+06	5.62434e+06	5.42077e+06	20.265	5.62429e+06	5.4204e+06	-12.9
5.64757e+06	5.60073e+06	5.64965e+06	5.60281e+06	5.4787	5.65023e+06	5.60321e+06	-2.2274		4.84156e+06	4.7789e+06	4.84322e+06	4.78059e+06	6.2511	4.84156e+06	4.7789e+06	11				5.62339e+06	5.41962e+06	5.62402e+06	5.42019e+06	-7.4203	5.62339e+06	5.42054e+06	-19.9
5.64757e+06	5.60073e+06	5.6487e+06	5.60198e+06	15.99	5.64966e+06	5.60271e+06	0.03		4.84156e+06	4.7789e+06	4.84234e+06	4.77959e+06	-9.0434	4.84156e+06	4.7799e+06	-30				5.62339e+06	5.41962e+06	5.62412e+06	5.42028e+06	-8.2377	5.62339e+06	5.41962e+06	7.1
5.64757e+06	5.60073e+06	5.64834e+06	5.6015e+06	5.99	5.65034e+06	5.60345e+06	3.6316		4.84156e+06	4.7789e+06	4.84169e+06	4.77906e+06	21.135	4.84224e+06	4779508	-8				5.62339e+06	5.41962e+06	5.62389e+06	5.42018e+06	14.1	5.62417e+06	5.42048e+06	12.1
5.64757e+06	5.60073e+06	5.64831e+06	5.60142e+06	-1.01	5.64837e+06	5.60151e+06	2.99		4.84156e+06	4.7789e+06	4.84248e+06	4.78006e+06	25.325	4.84156e+06	4.77985e+06	-26				5.62339e+06	5.41962e+06	5.62339e+06	5.41962e+06	13.1	5.62339e+06	5.41962e+06	-10.9
5.64757e+06	5.60073e+06	5.64849e+06	5.60163e+06	2.99	5.64828e+06	5.60125e+06	-30.01		4.84156e+06	4.7789e+06	4.84193e+06	4.77929e+06	7	4.84156e+06	4.77891e+06	0				5.62339e+06	5.41962e+06	5.62339e+06	5.41962e+06	3.1	5.62418e+06	5.42052e+06	14.1
5.64757e+06	5.60073e+06	5.64757e+06	5.60073e+06	-34.401	5.64758e+06	5.60073e+06	-13.01		4.84156e+06	4.7789e+06	4.84249e+06	4.77975e+06	-5	4.84156e+06	4.77891e+06	18				5.62339e+06	5.41962e+06	5.62339e+06	5.41962e+06	-2.9	5.62339e+06	5.41962e+06	-13.9
5.64757e+06	5.60073e+06	5.64757e+06	5.60073e+06	65.063	5.64758e+06	5.60073e+06	-1.01		4.84156e+06	4.7789e+06	4.84163e+06	4.77907e+06	64	4.84251e+06	4779706	-14				5.62339e+06	5.41962e+06	5.62411e+06	5.42046e+06	17.1	5.62339e+06	5.41962e+06	-29.9
5.64757e+06	5.60073e+06	5.64757e+06	5.60073e+06	53.7	5.64809e+06	5.60118e+06	-11.01		4.84156e+06	4.7789e+06	4.84238e+06	4.7789e+06	29	4.84156e+06	4.77891e+06	-4				5.62339e+06	5.41962e+06	5.62339e+06	5.41962e+06	13.1	5.62339e+06	5.41962e+06	7.1
5.64757e+06	5.60073e+06	5.64758e+06	5.60073e+06	11.99	5.64804e+06	5.60117e+06	1.99		4.84156e+06	4.7789e+06	4.842e+06	4779573	39	4.84214e+06	4.77946e+06	1				5.62339e+06	5.41962e+06	5.62339e+06	5.41962e+06	-8.9	5.6238e+06	5.41998e+06	-10.9
5.64757e+06	5.60073e+06	5.64758e+06	5.60073e+06	-9.01	5.64793e+06	5.60101e+06	-23.01		4.84156e+06	4.7789e+06	4.84156e+06	4.7789e+06	-6	4.84156e+06	4.77891e+06	2				5.62339e+06	5.41962e+06	5.62339e+06	5.41962e+06	7.1	5.62429e+06	5.41962e+06	14.1
5.64757e+06	5.60073e+06	5.64856e+06	5.60073e+06	6.99	5.64758e+06	5.60172e+06	2.99		4.84156e+06	4.7789e+06	4.84156e+06	4.77891e+06	1	4.84156e+06	4.77891e+06	23				5.62339e+06	5.41962e+06	5.62339e+06	5.41962e+06	12.1	5.62373e+06	5.41998e+06	7.1
5.64757e+06	5.60073e+06	5.64758e+06	5.60073e+06	6.99	5.64787e+06	5.60103e+06	7.99		4.84156e+06	4.7789e+06	4.84183e+06	4.7793e+06	36	4.84251e+06	4.7789e+06	18				5.62339e+06	5.41962e+06	5.62339e+06	5.41962e+06	23.1	5.62339e+06	5.41962e+06	-6.9
5.64757e+06	5.60073e+06	5.64758e+06	5.60073e+06	23.99	5.64835e+06	5.60154e+06	8.99		4.84156e+06	4.7789e+06	4.84232e+06	4.77978e+06	18	4.8421e+06	4.77951e+06	16				5.62339e+06	5.41962e+06	5.62362e+06	5.4199e+06	20.1	5.62339e+06	5.41962e+06	4.1
5.64757e+06	5.60073e+06	5.64758e+06	5.60073e+06	5.99	5.64802e+06	5.60113e+06	-4.01		4.84156e+06	4.7789e+06	4.84156e+06	4.77891e+06	1	4.84231e+06	4.77976e+06	18				5.62339e+06	5.41962e+06	5.62339e+06	5.41962e+06	6.1	5.62339e+06	5.41962e+06	-19.9
5.64757e+06	5.60073e+06	5.64758e+06	5.60073e+06	13.99					4.84156e+06	4.7789e+06	4.84185e+06	4.77953e+06	58	4.84156e+06	4.7789e+06	14				5.62339e+06	5.41962e+06				5.62339e+06	5.41962e+06	-8.9
5.64757e+06	5.60073e+06	5.64823e+06	5.60144e+06	13.99					4.84156e+06	4.7789e+06	4.84165e+06	4.7791e+06	57	4.84214e+06	4.77946e+06	1				5.62339e+06	5.41962e+06				5.62388e+06	5.42006e+06	-7.9
5.64757e+06	5.60073e+06	5.64814e+06	5.60137e+06	16.99					4.84156e+06	4.7789e+06	4.84156e+06	4.7789e+06	3	4.84214e+06	4.77942e+06	-8
5.64757e+06	5.60073e+06	5.64839e+06	5.60164e+06	14.99					4.84156e+06	4.7789e+06	4.84185e+06	4.77925e+06	20	4.84251e+06	4.7789e+06	15
5.64757e+06	5.60073e+06	5.64758e+06	5.60073e+06	14.99					4.84156e+06	4.7789e+06	4.84156e+06	4.77891e+06	1	4.84156e+06	4.77891e+06	0
5.64757e+06	5.60073e+06	5.64758e+06	5.60073e+06	5.99					4.84156e+06	4.7789e+06				4.84235e+06	4.77982e+06	18
5.64757e+06	5.60073e+06	5.64758e+06	5.60073e+06	-9.01

## Sheet: Experiment2
pair: Nud1-mTUR Bfa1-EYFP									pair: Nud1-mTUR Bfa1-EYFP
condition: bmh1∆ Gal1-KIN4 oe									condition: bmh1∆ cycling cells
P=0,01									P=0,0001
FL(bg)bb	FL(bg)ab	FL(D)bb	FL(D)ab	FRET (D) %	FL(DA)bb	FL(DA)ab	FRET(DA) %		FL(bg)bb	FL(bg)ab	FL(D)bb	FL(D)ab	FRET (D) %	FL(DA)bb	FL(DA)ab	FRET(DA) %
4.76095e+06	4.6695e+06	11038000	10966939	2.1986	1.19281e+07	11826556	-7.52475		5.17004e+06	5.13472e+06	5.17119e+06	5.13573e+06	-8.434	5.13822e+06	5.13791e+06	-4.4264
4.76095e+06	4.6695e+06	10553909	10386559	-6.74862	1.16741e+07	11779903	2.0651		5.17004e+06	5.13472e+06	5.17131e+06	5.13609e+06	12.9184	5.13632e+06	5.13625e+06	0.4947
4.76095e+06	4.6695e+06	11263828	11095485	-4.93279	1.1277e+07	11593472	13.3183		5.17004e+06	5.13472e+06	5.17106e+06	5.13581e+06	12.1941	5.13642e+06	5.13645e+06	7.0225
4.76095e+06	4.6695e+06	10392033	10039522	-56.4304	1.13558e+07	11364657	-2.36559		5.17004e+06	5.13472e+06	5.17134e+06	5.13609e+06	10.3543	5.13665e+06	5.13681e+06	12.8009
4.76095e+06	4.6695e+06	10867116	10568913	-20.0731	1.14963e+07	11811992	11.6517		5.17004e+06	5.13472e+06	5.17074e+06	5.13528e+06	-19.914	5.13875e+06	5.13918e+06	14.8003
4.76095e+06	4.6695e+06	10377828	10195354	-10.8025	1.08303e+07	10805897	-4.97393		5.17004e+06	5.13472e+06	5.1712e+06	5.13594e+06	10.2595	5.14176e+06	5.14167e+06	3.8501
4.76095e+06	4.6695e+06	11250507	11219520	3.92337	1.14131e+07	11532481	3.42593		5.17004e+06	5.13472e+06	5.17226e+06	5.13684e+06	0.2824	5.13636e+06	5.13656e+06	15.859
4.76095e+06	4.6695e+06	11254679	11234403	4.53158	1.14804e+07	11434819	-5.4201		5.17004e+06	5.13472e+06	5.17111e+06	5.13582e+06	7.6482	5.13558e+06	5.13557e+06	4.43886
4.76095e+06	4.6695e+06	11868964	11733531	-2.73538	1.14797e+07	11465956	-3.63465		5.17004e+06	5.13472e+06	5.17052e+06	5.13519e+06	4.38587	5.13758e+06	5.13775e+06	10.6376
4.76095e+06	4.6695e+06	10927521	10824025	0.0725674	1.07676e+07	10935276	10.061		5.17004e+06	5.13472e+06	5.17158e+06	5.13596e+06	-19.123	5.13567e+06	5.13584e+06	20.245
4.76095e+06	4.6695e+06	11004626	10940191	2.81261	1.13268e+07	11439392	3.37754		5.17004e+06	5.13472e+06	5.17085e+06	5.13545e+06	-6.021	5.1372e+06	5.13736e+06	11.1385
4.76095e+06	4.6695e+06	11179135	11081075	-0.0768546	1.08242e+07	10984433	9.03474		5.17004e+06	5.13472e+06	5.17156e+06	5.1361e+06	-4.4107	5.13526e+06	5.13544e+06	30.244
4.76095e+06	4.6695e+06	11374755	11038840	-16.9936	1.14542e+07	11642700	6.53192		5.17004e+06	5.13472e+06	5.17219e+06	5.13703e+06	12.3101	5.13526e+06	5.13526e+06	4.0532
4.76095e+06	4.6695e+06	11248925	11268393	6.81729	1.08754e+07	10867880	-3.49609		5.17004e+06	5.13472e+06	5.17197e+06	5.13678e+06	11.8424	5.13696e+06	5.13707e+06	9.6878
4.76095e+06	4.6695e+06	11821300	11724970	-0.859494	1.08677e+07	10845450	-4.72359		5.17004e+06	5.13472e+06	5.1723e+06	5.13653e+06	-19.123	5.13651e+06	5.13665e+06	12.0098
4.76095e+06	4.6695e+06	11323097	11373817	8.03001	1.06434e+07	10777323	8.88903		5.17004e+06	5.13472e+06	5.1724e+06	5.13711e+06	6.4367	5.13543e+06	5.13546e+06	9.5572
4.76095e+06	4.6695e+06	10703827	10642653	4.82674	1.07993e+07	10811746	-1.81673		5.17004e+06	5.13472e+06	5.17073e+06	5.13546e+06	12.9422	5.13557e+06	5.13593e+06	34.59
4.76095e+06	4.6695e+06	11057434	10923230	-2.54832	1.14037e+07	11415376	-2.22174		5.17004e+06	5.13472e+06	5.17183e+06	5.13654e+06	6.8131	5.13558e+06	5.13569e+06	16.281
4.76095e+06	4.6695e+06	11769689	11708786	0.868603	1.15986e+07	11920450	11.231		5.17004e+06	5.13472e+06	5.17151e+06	5.136e+06	-9.412	5.1363e+06	5.13659e+06	20.696
4.76095e+06	4.6695e+06	10738992	10692780	5.88079	1.17932e+07	11773104	-3.82272		5.17004e+06	5.13472e+06	5.17127e+06	5.13593e+06	3.3964	5.13533e+06	5.13537e+06	11.7199
4.76095e+06	4.6695e+06	11304343	10869955	-26.9362	1.14123e+07	11601037	6.74175		5.17004e+06	5.13472e+06	5.17118e+06	5.13591e+06	9.9165	5.1356e+06	5.13556e+06	0.5984
4.76095e+06	4.6695e+06	10576610	10360937	-13.5871	1.07617e+07	10620730	-17.2461		5.17004e+06	5.13472e+06	5.17143e+06	5.13602e+06	-1.8143	5.13668e+06	5.13646e+06	-7.723
4.76095e+06	4.6695e+06	10788956	10749823	6.06831	1.04685e+07	10232837	-42.6232		5.17004e+06	5.13472e+06	5.17164e+06	5.13648e+06	14.4935	5.13595e+06	5.13587e+06	-2.0617
4.76095e+06	4.6695e+06	11525039	11263233	-10.4778	1.05295e+07	10670846	10.8253		5.17004e+06	5.13472e+06	5.17199e+06	5.13648e+06	-5.254	5.13701e+06	5.13726e+06	14.9839
4.76095e+06	4.6695e+06	11000728	10627803	-26.6112	1.12925e+07	11869029	22.9806		5.17004e+06	5.13472e+06	5.17074e+06	5.13533e+06	-8.173	5.13664e+06	5.13667e+06	7.0592
4.76095e+06	4.6695e+06	10905793	10809811	0.750656	1.09305e+07	11073179	7.0772		5.17004e+06	5.13472e+06	5.17103e+06	5.13573e+06	7.1947	5.137e+06	5.13745e+06	21.584
4.76095e+06	4.6695e+06	11035952	11039880	7.29009	1.10849e+07	11288088	9.44536		5.17004e+06	5.13472e+06	5.17089e+06	5.13564e+06	12.7282	5.13656e+06	5.13651e+06	2.6923
4.76095e+06	4.6695e+06	10398825	10339651	8.44919	1.07224e+07	10884938	10.1752		5.17004e+06	5.13472e+06	5.17139e+06	5.13589e+06	-9.516	5.1356e+06	5.13575e+06	19.425
4.76095e+06	4.6695e+06				1.10737e+07	11255525	8.37324		5.17004e+06	5.13472e+06	5.17201e+06	5.13644e+06	-9.482	5.13613e+06	5.13601e+06	-4.2707
4.76095e+06	4.6695e+06				1.08966e+07	11016016	5.79824		5.17004e+06	5.13472e+06	5.17129e+06	5.13578e+06	-12.813	5.13542e+06	5.13538e+06	-1.6967
4.76095e+06	4.6695e+06				1.11586e+07	11223631	1.22568		5.17004e+06	5.13472e+06	5.17139e+06	5.13596e+06	-3.6474	5.13709e+06	5.13687e+06	-5.308
4.76095e+06	4.6695e+06				1.08586e+07	11106680	14.0296		5.17004e+06	5.13472e+06	5.17076e+06	5.13539e+06	-0.855	5.13732e+06	5.13757e+06	13.8796
4.76095e+06	4.6695e+06				1.1488e+07	11427771	-6.24903		5.17004e+06	5.13472e+06	5.17174e+06	5.13621e+06	-8.688	5.13686e+06	5.13692e+06	7.6362
4.76095e+06	4.6695e+06				1.12322e+07	11183878	-6.00726		5.17004e+06	5.13472e+06	5.17147e+06	5.13614e+06	4.18968	5.1355e+06	5.13569e+06	24.282
4.76095e+06	4.6695e+06				1.06792e+07	10719088	0.817908		5.17004e+06	5.13472e+06	5.17075e+06	5.13551e+06	15.754	5.13631e+06	5.13636e+06	8.3835
4.76095e+06	4.6695e+06				1.05382e+07	10813168	20.5576		5.17004e+06	5.13472e+06	5.17163e+06	5.13623e+06	-0.2901	5.1355e+06	5.13562e+06	19.015
4.76095e+06	4.6695e+06				1.01189e+07	10276026	21.8142		5.17004e+06	5.13472e+06	5.17141e+06	5.13593e+06	-8.196	5.1365e+06	5.13635e+06	-3.6463
4.76095e+06	4.6695e+06				1.06362e+07	10661336	-0.415572		5.17004e+06	5.13472e+06	5.17084e+06	5.13537e+06	-17.061	5.13702e+06	5.13717e+06	11.4138
4.76095e+06	4.6695e+06				1.12073e+07	11279292	1.50862
4.76095e+06	4.6695e+06				1.04951e+07	10380803	-18.3106
4.76095e+06	4.6695e+06				1.11388e+07	11108218	-4.96055
4.76095e+06	4.6695e+06				1.10391e+07	11004416	-5.41846
4.76095e+06	4.6695e+06				1.08691e+07	10956581	3.76463
4.76095e+06	4.6695e+06				1.11854e+07	11391896	8.90762
4.76095e+06	4.6695e+06				1.0939e+07	10914339	-4.81468
4.76095e+06	4.6695e+06				1.09201e+07	11083876	8.46196
4.76095e+06	4.6695e+06				1.07422e+07	10731453	-3.86256
4.76095e+06	4.6695e+06				1.11723e+07	11146474	-4.59671
4.76095e+06	4.6695e+06				1.07852e+07	11172333	22.378
4.76095e+06	4.6695e+06				1.07119e+07	10720308	-2.10407
4.76095e+06	4.6695e+06				1.03005e+07	10331303	1.56888
4.76095e+06	4.6695e+06				1.04762e+07	10898346	30.6615
4.76095e+06	4.6695e+06				1.11448e+07	11397525	11.4976
