# Supplementary material for: A FRET-based study reveals site-specific regulation of spindle position checkpoint proteins at yeast centrosomes
Source: eLife. 2016 May 9;5:e14029. doi: 10.7554/eLife.14029 (PMC4878874; doi:10.7554/eLife.14029)
Supplement: Figure 3—source data 5. — DOI: http://dx.doi.org/10.7554/eLife.14029.023 [file elife-14029-fig3-data5.xlsx]

## Sheet: Description
Description:
List of Abbreviations
Raw Mean Fluoresence Intensity before bleach (Donor/Aceptor): FL (DA) bb
Raw Mean Fluoresence Intensity before bleach (Donor only): FL (D) bb
Raw Mean Fluoresence Intensity before bleach (Background): FL (bg) bb
Raw Mean Fluoresence Intensity after bleach (Donor/Aceptor): FL (DA) ab
Raw Mean Fluoresence Intensity after bleach (Donor only): FL (D) ab
RawMean Fluoresence Intensity after bleach (Background): FL (bg) ab
Calculated FRET efficiency % for the indicated Donor/Acceptor pair) : FRET % (DA)
Calculated FRET efficiency % background for Donor only sample : FRET % (D)
daughter SPB: dSPB
mother SPB: mSPB
P-value for the indicated pair FRET % (DA) and FRET % (D) according to students t-test: P

## Sheet: Experiment 1
pair: Nud1-mTUR Bfa1-EYFP									pair: Nud1-mTUR Bfa1-EYFP
condition: kar9∆ misaligned spindle									condition: kar9∆ normal aligned spindle
P=	0.00029153								p	6.98844e-05
									FL(bg)bb	FL(bg)ab	FL(DA)bb normal saligned	FL(DA)ab normal aligned	FRET(DA) % normal aligned	FL(D)bb dSPB	FL(D)ab dSPB	FRET(D) %
FL(bg)bb	FL(bg)ab	FL(DA)bb misaligned	FL(DA)ab misaligned	FRET(DA) % misaligned	FL(D)bb dSPB	FL(D)ab dSPB	FRET(D) %		4.35724e+06	4.18612e+06	4.3579e+06	4.18673e+06	1	4.35822e+06	4.1869e+06	-18
4.35724e+06	4.18612e+06	4.35731e+06	4.18636e+06	77	4.35822e+06	4.1869e+06	-18		4.35724e+06	4.18612e+06	4.3575e+06	4.18649e+06	39	4.35771e+06	4.18672e+06	29
4.35724e+06	4.18612e+06	4.35724e+06	4.18612e+06	21	4.35771e+06	4.18672e+06	29		4.35724e+06	4.18612e+06	4.35724e+06	4.18612e+06	7	4.35724e+06	4.18685e+06	-36
4.35724e+06	4.18612e+06	4.35809e+06	4.18702e+06	14	4.35724e+06	4.18685e+06	-36		4.35724e+06	4.18612e+06	4.35724e+06	4.18612e+06	11	4.3578e+06	4.18664e+06	0
4.35724e+06	4.18612e+06	4.358e+06	4.18671e+06	-21	4.3578e+06	4.18664e+06	0		4.35724e+06	4.18612e+06	4.35787e+06	4.18695e+06	32	4.35784e+06	4.18657e+06	-26
4.35724e+06	4.18612e+06	4.35821e+06	4.18612e+06	30	4.35784e+06	4.18657e+06	-26		4.35724e+06	4.18612e+06	4.35724e+06	4.18612e+06	14	4.35724e+06	4.18612e+06	5
4.35724e+06	4.18612e+06	4.35793e+06	4.18682e+06	9	4.35724e+06	4.18612e+06	5		4.35724e+06	4.18612e+06	4.35724e+06	4.18612e+06	21	4.35773e+06	4.18652e+06	-17
4.35724e+06	4.18612e+06	4.3573e+06	4.18623e+06	54	4.35773e+06	4.18652e+06	-17		4.35724e+06	4.18612e+06	4.35818e+06	4.18699e+06	0	4.35755e+06	4.18639e+06	-7
4.35724e+06	4.18612e+06	4.35786e+06	4.18675e+06	9	4.35755e+06	4.18639e+06	-7		4.35724e+06	4.18612e+06	4.35724e+06	4.18612e+06	-2	4.35743e+06	4.18641e+06	44
4.35724e+06	4.18612e+06	4.35724e+06	4.18612e+06	2	4.35743e+06	4.18641e+06	44		4.35724e+06	4.18612e+06	4.35821e+06	4.187e+06	-2	4.3578e+06	4.18693e+06	39
4.35724e+06	4.18612e+06	4.35752e+06	4.1865e+06	34	4.3578e+06	4.18693e+06	39		4.35724e+06	4.18612e+06	4.35813e+06	4.1871e+06	18	4.35794e+06	4.18676e+06	0
4.35724e+06	4.18612e+06	4.35758e+06	4.18647e+06	13	4.35794e+06	4.18676e+06	0		4.35724e+06	4.18612e+06	4.35761e+06	4.18645e+06	-6	4.35724e+06	4.18612e+06	-4
4.35724e+06	4.18612e+06	4.35793e+06	4.18687e+06	16	4.35724e+06	4.18612e+06	-4		4.35724e+06	4.18612e+06	4.35812e+06	4.187e+06	8	4.35763e+06	4.18647e+06	-5
4.35724e+06	4.18612e+06	4.35762e+06	4.18642e+06	-18	4.35763e+06	4.18647e+06	-5		4.35724e+06	4.18612e+06	4.35812e+06	4.18696e+06	3	4.35724e+06	4.18612e+06	-11
4.35724e+06	4.18612e+06	4.35725e+06	4.18613e+06	58	4.35724e+06	4.18612e+06	-11		4.35724e+06	4.18612e+06	4.35806e+06	4.18705e+06	20	4.35812e+06	4.18688e+06	-8
4.35724e+06	4.18612e+06	4.35724e+06	4.18612e+06	10	4.35812e+06	4.18688e+06	-8		4.35724e+06	4.18612e+06	4.35777e+06	4.18658e+06	-5	4.35806e+06	4.18691e+06	4
4.35724e+06	4.18612e+06	4.35781e+06	4.18676e+06	19	4.35806e+06	4.18691e+06	4		4.35724e+06	4.18612e+06	4.3574e+06	4.18634e+06	37	4.35724e+06	4.18711e+06	3
4.35724e+06	4.18612e+06	4.3582e+06	4.18709e+06	9	4.35724e+06	4.18711e+06	3		4.35724e+06	4.18612e+06	4.35814e+06	4.18612e+06	22	4.35762e+06	4.18641e+06	-23
4.35724e+06	4.18612e+06	4.35771e+06	4.18675e+06	34	4.35762e+06	4.18641e+06	-23		4.35724e+06	4.18612e+06	4.35767e+06	4.18696e+06	57	4.3577e+06	4.18654e+06	-1
4.35724e+06	4.18612e+06	4.35778e+06	4.1866e+06	-4	4.3577e+06	4.18654e+06	-1		4.35724e+06	4.18612e+06	4.35771e+06	4.18674e+06	31	4.35724e+06	4.18612e+06	7
4.35724e+06	4.18612e+06	4.35724e+06	4.18612e+06	16	4.35724e+06	4.18612e+06	7		4.35724e+06	4.18612e+06	4.3582e+06	4.18696e+06	-5	4.35749e+06	4.18633e+06	-8
4.35724e+06	4.18612e+06	4.35724e+06	4.18612e+06	4	4.35749e+06	4.18633e+06	-8		4.35724e+06	4.18612e+06	4.35764e+06	4.18668e+06	36	4.35724e+06	4.18706e+06	0
4.35724e+06	4.18612e+06	4.35724e+06	4.18612e+06	13	4.35724e+06	4.18706e+06	0		4.35724e+06	4.18612e+06	4.35782e+06	4.18682e+06	25	4.35724e+06	4.18612e+06	14
4.35724e+06	4.18612e+06	4.35808e+06	4.18698e+06	11	4.35724e+06	4.18612e+06	14		4.35724e+06	4.18612e+06	4.3579e+06	4.18661e+06	-26	4.35755e+06	4.18639e+06	-7
4.35724e+06	4.18612e+06	4.35724e+06	4.18612e+06	17	4.35755e+06	4.18639e+06	-7		4.35724e+06	4.18612e+06	4.35738e+06	4.1863e+06	27	4.35724e+06	4.18612e+06	20
4.35724e+06	4.18612e+06	4.35793e+06	4.18694e+06	24	4.35724e+06	4.18612e+06	20		4.35724e+06	4.18612e+06	4.35771e+06	4.18678e+06	37	4.35724e+06	4.18612e+06	1
4.35724e+06	4.18612e+06	4.35817e+06	4.18711e+06	15	4.35724e+06	4.18612e+06	1		4.35724e+06	4.18612e+06	4.35776e+06	4.18677e+06	27	4.3578e+06	4.18668e+06	8
4.35724e+06	4.18612e+06	4.35724e+06	4.18612e+06	21	4.3578e+06	4.18668e+06	8		4.35724e+06	4.18612e+06	4.35724e+06	4.18612e+06	3	4.35772e+06	4.18654e+06	-7
4.35724e+06	4.18612e+06	4.35798e+06	4.1869e+06	13	4.35772e+06	4.18654e+06	-7		4.35724e+06	4.18612e+06	4.35724e+06	4.18612e+06	18	4.35799e+06	4.18695e+06	18
4.35724e+06	4.18612e+06	4.35724e+06	4.18612e+06	9	4.35799e+06	4.18695e+06	18		4.35724e+06	4.18612e+06	4.35724e+06	4.18612e+06	5	4.35774e+06	4.18655e+06	-7
4.35724e+06	4.18612e+06	4.35724e+06	4.18612e+06	-4	4.35774e+06	4.18655e+06	-7		4.35724e+06	4.18612e+06	4.35823e+06	4.18612e+06	22	4.35822e+06	4.187e+06	-3
4.35724e+06	4.18612e+06	4.35724e+06	4.18612e+06	3	4.35822e+06	4.187e+06	-3		4.35724e+06	4.18612e+06	4.35724e+06	4.18612e+06	18	4.35724e+06	4.18612e+06	5
4.35724e+06	4.18612e+06	4.3582e+06	4.18612e+06	23	4.35724e+06	4.18612e+06	5		4.35724e+06	4.18612e+06	4.35724e+06	4.18612e+06	9	4.358e+06	4.18682e+06	0
4.35724e+06	4.18612e+06	4.35724e+06	4.18612e+06	2	4.358e+06	4.18682e+06	0		4.35724e+06	4.18612e+06	4.35801e+06	4.18699e+06	20	4.35724e+06	4.18612e+06	11
4.35724e+06	4.18612e+06	4.35724e+06	4.18612e+06	12	4.35724e+06	4.18612e+06	11		4.35724e+06	4.18612e+06	4.35805e+06	4.18703e+06	20	4.35724e+06	4.18612e+06	11
4.35724e+06	4.18612e+06	4.35807e+06	4.18694e+06	7	4.35724e+06	4.18612e+06	11		4.35724e+06	4.18612e+06	4.35794e+06	4.18672e+06	-8	4.35773e+06	4.18656e+06	-2
4.35724e+06	4.18612e+06				4.35773e+06	4.18656e+06	-2		4.35724e+06	4.18612e+06	4.35787e+06	4.18671e+06	1	4.35724e+06	4.18612e+06	9
4.35724e+06	4.18612e+06				4.35724e+06	4.18612e+06	9		4.35724e+06	4.18612e+06	4.35763e+06	4.18666e+06	36	4.35724e+06	4.18612e+06	4
4.35724e+06	4.18612e+06				4.35724e+06	4.18612e+06	4		4.35724e+06	4.18612e+06	4.35724e+06	4.18612e+06	0	4.3579e+06	4.18673e+06	0
4.35724e+06	4.18612e+06				4.3579e+06	4.18673e+06	0		4.35724e+06	4.18612e+06	4.35724e+06	4.18708e+06	0	4.35763e+06	4.18641e+06	-26
4.35724e+06	4.18612e+06				4.35763e+06	4.18641e+06	-26		4.35724e+06	4.18612e+06	4.35724e+06	4.18612e+06	1	4.35781e+06	4.18668e+06	6
4.35724e+06	4.18612e+06				4.35781e+06	4.18668e+06	6		4.35724e+06	4.18612e+06	4.35795e+06	4.18693e+06	20
4.35724e+06	4.18612e+06								4.35724e+06	4.18612e+06	4.3574e+06	4.18639e+06	47
4.35724e+06	4.18612e+06								4.35724e+06	4.18612e+06	4.35724e+06	4.18612e+06	6
4.35724e+06	4.18612e+06								4.35724e+06	4.18612e+06	4.35811e+06	4.18612e+06	22
4.35724e+06	4.18612e+06								4.35724e+06	4.18612e+06	4.35798e+06	4.18691e+06	15
4.35724e+06	4.18612e+06								4.35724e+06	4.18612e+06	4.35779e+06	4.18678e+06	25
4.35724e+06	4.18612e+06								4.35724e+06	4.18612e+06	4.35708e+06	4.18589e+06	38
4.35724e+06	4.18612e+06								4.35724e+06	4.18612e+06	4.35813e+06	4.18612e+06	20
4.35724e+06	4.18612e+06								4.35724e+06	4.18612e+06	4.35811e+06	4.18612e+06	22
4.35724e+06	4.18612e+06								4.35724e+06	4.18612e+06	4.35724e+06	4.18711e+06	5
4.35724e+06	4.18612e+06								4.35724e+06	4.18612e+06	4.35724e+06	4.18612e+06	5
4.35724e+06	4.18612e+06								4.35724e+06	4.18612e+06	4.35724e+06	4.18612e+06	7
4.35724e+06	4.18612e+06								4.35724e+06	4.18612e+06	4.35724e+06	4.18612e+06	1
4.35724e+06	4.18612e+06								4.35724e+06	4.18612e+06	4.35724e+06	4.18612e+06	6
4.35724e+06	4.18612e+06								4.35724e+06	4.18612e+06	4.35724e+06	4.18612e+06	-2
4.35724e+06	4.18612e+06								4.35724e+06	4.18612e+06	4.3582e+06	4.18694e+06	-9
4.35724e+06	4.18612e+06								4.35724e+06	4.18612e+06	4.35724e+06	4.18612e+06	2
4.35724e+06	4.18612e+06								4.35724e+06	4.18612e+06	4.35724e+06	4.18612e+06	17
4.35724e+06	4.18612e+06								4.35724e+06	4.18612e+06	4.35724e+06	4.18612e+06	10
4.35724e+06	4.18612e+06

## Sheet: Experiment2
pair: Nud1-mTUR Bfa1-EYFP									pair: Nud1-mTUR Bfa1-EYFP
condition: kar9∆ aligned spindle									condition: kar9∆ misaligned spindle
P=0,00002									P=0,00006
FL(bg)bb	FL(bg)ab	FL(D)bb	FL(D)ab	FRET (D) %	FL(DA)bb	FL(DA)ab	FRET(DA) %		FL(bg)bb	FL(bg)ab	FL(D)bb	FL(D)ab	FRET (D) %	FL(DA)bb	FL(DA)ab	FRET(DA) %
5.06736e+06	5.02938e+06	5.06929e+06	5.0313e+06	5.73978	5.0324e+06	5.03247e+06	8.4787		5.06736e+06	5.02938e+06	5.06929e+06	5.0313e+06	5.73978	5.03276e+06	5.03301e+06	13.1765
5.06736e+06	5.02938e+06	5.06939e+06	5.03131e+06	1.5219	5.03098e+06	5.031e+06	7.3137		5.06736e+06	5.02938e+06	5.06939e+06	5.03131e+06	1.5219	5.03081e+06	5.03082e+06	7.03001
5.06736e+06	5.02938e+06	5.06845e+06	5.0306e+06	17.22	5.0307e+06	5.03065e+06	2.5623		5.06736e+06	5.02938e+06	5.06845e+06	5.0306e+06	17.22	5.03066e+06	5.03058e+06	-0.9416
5.06736e+06	5.02938e+06	5.0684e+06	5.03027e+06	-9.186	5.03252e+06	5.03255e+06	7.00453		5.06736e+06	5.02938e+06	5.0684e+06	5.03027e+06	-9.186	5.03046e+06	5.03052e+06	11.5393
5.06736e+06	5.02938e+06	5.06803e+06	5.02996e+06	-8.704	5.03209e+06	5.03232e+06	14.0227		5.06736e+06	5.02938e+06	5.06803e+06	5.02996e+06	-8.704	5.03062e+06	5.03099e+06	28.886
5.06736e+06	5.02938e+06	5.06866e+06	5.03059e+06	-0.7569	5.0317e+06	5.03191e+06	14.3163		5.06736e+06	5.02938e+06	5.06866e+06	5.03059e+06	-0.7569	5.0308e+06	5.03086e+06	10.2537
5.06736e+06	5.02938e+06	5.06807e+06	5.0301e+06	9.5388	5.03084e+06	5.03078e+06	2.5503		5.06736e+06	5.02938e+06	5.06807e+06	5.0301e+06	9.5388	5.03059e+06	5.0306e+06	6.81906
5.06736e+06	5.02938e+06	5.06861e+06	5.03041e+06	-13.958	5.0304e+06	5.03068e+06	27.64		5.06736e+06	5.02938e+06	5.06861e+06	5.03041e+06	-13.958	5.0307e+06	5.03069e+06	5.49146
5.06736e+06	5.02938e+06	5.06848e+06	5.0303e+06	-14.593	5.03176e+06	5.03172e+06	4.4632		5.06736e+06	5.02938e+06	5.06848e+06	5.0303e+06	-14.593	5.03016e+06	5.03039e+06	28.479
5.06736e+06	5.02938e+06	5.06831e+06	5.03008e+06	-27.216	5.03116e+06	5.03125e+06	11.1476		5.06736e+06	5.02938e+06	5.06831e+06	5.03008e+06	-27.216	5.03106e+06	5.03126e+06	16.564
5.06736e+06	5.02938e+06	5.06762e+06	5.02965e+06	11.5651	5.0302e+06	5.03019e+06	4.4301		5.06736e+06	5.02938e+06	5.06762e+06	5.02965e+06	11.5651	5.03141e+06	5.03116e+06	-7.673
5.06736e+06	5.02938e+06	5.06871e+06	5.03061e+06	-2.953	5.03093e+06	5.03108e+06	15.2556		5.06736e+06	5.02938e+06	5.06871e+06	5.03061e+06	-2.953	5.03199e+06	5.03191e+06	2.8317
5.06736e+06	5.02938e+06	5.06757e+06	5.02955e+06	-10.189	5.03113e+06	5.03103e+06	-0.02		5.06736e+06	5.02938e+06	5.06757e+06	5.02955e+06	-10.189	5.03008e+06	5.03028e+06	27.97
5.06736e+06	5.02938e+06	5.06942e+06	5.03146e+06	7.773	5.03183e+06	5.03187e+06	7.6316		5.06736e+06	5.02938e+06	5.06942e+06	5.03146e+06	7.773	5.03004e+06	5.03021e+06	26.777
5.06736e+06	5.02938e+06	5.07e+06	5.03197e+06	4.8107	5.03225e+06	5.03231e+06	8.4911		5.06736e+06	5.02938e+06	5.07e+06	5.03197e+06	4.8107	5.03025e+06	5.03011e+06	-13.015
5.06736e+06	5.02938e+06	5.06825e+06	5.03005e+06	-26.069	5.03264e+06	5.03219e+06	-9.73		5.06736e+06	5.02938e+06	5.06825e+06	5.03005e+06	-26.069	5.02994e+06	5.03002e+06	18.089
5.06736e+06	5.02938e+06	5.06883e+06	5.03077e+06	0.5265	5.03177e+06	5.0319e+06	11.4774		5.06736e+06	5.02938e+06	5.06883e+06	5.03077e+06	0.5265	5.02964e+06	5.02974e+06	33.414
5.06736e+06	5.02938e+06	5.06974e+06	5.03151e+06	-5.015	5.03177e+06	5.03187e+06	10.2249		5.06736e+06	5.02938e+06	5.06974e+06	5.03151e+06	-5.015	5.02985e+06	5.02989e+06	13.3389
5.06736e+06	5.02938e+06	5.06938e+06	5.03131e+06	1.4999	5.03075e+06	5.03088e+06	14.7775		5.06736e+06	5.02938e+06	5.06938e+06	5.03131e+06	1.4999	5.02995e+06	5.03013e+06	29.928
5.06736e+06	5.02938e+06	5.0682e+06	5.03022e+06	7.03968	5.0315e+06	5.03156e+06	9.2099		5.06736e+06	5.02938e+06	5.0682e+06	5.03022e+06	7.03968	5.03077e+06	5.031e+06	20.383
5.06736e+06	5.02938e+06	5.06835e+06	5.03057e+06	23.364	5.03029e+06	5.03047e+06	22.233		5.06736e+06	5.02938e+06	5.06835e+06	5.03057e+06	23.364	5.03075e+06	5.03077e+06	7.9916
5.06736e+06	5.02938e+06	5.0689e+06	5.03092e+06	6.45796	5.02999e+06	5.03009e+06	20.714		5.06736e+06	5.02938e+06	5.0689e+06	5.03092e+06	6.45796	5.02995e+06	5.02998e+06	10.1343
5.06736e+06	5.02938e+06	5.06899e+06	5.03094e+06	1.868	5.03045e+06	5.03077e+06	28.754		5.06736e+06	5.02938e+06	5.06899e+06	5.03094e+06	1.868	5.0304e+06	5.03023e+06	-14.025
5.06736e+06	5.02938e+06	5.06906e+06	5.03088e+06	-6.82	5.02999e+06	5.03002e+06	10.4997		5.06736e+06	5.02938e+06	5.06906e+06	5.03088e+06	-6.82	5.03073e+06	5.03078e+06	9.3091
5.06736e+06	5.02938e+06	5.06815e+06	5.03019e+06	9.0185	5.03005e+06	5.03005e+06	5.53043		5.06736e+06	5.02938e+06	5.06815e+06	5.03019e+06	9.0185	5.03044e+06	5.03053e+06	14.1986
5.06736e+06	5.02938e+06	5.06825e+06	5.0302e+06	-0.5301	5.03057e+06	5.03043e+06	-6.87		5.06736e+06	5.02938e+06	5.06825e+06	5.0302e+06	-0.5301	5.0298e+06	5.03001e+06	39.186
5.06736e+06	5.02938e+06	5.06886e+06	5.03073e+06	-4.226	5.03021e+06	5.03041e+06	25.135		5.06736e+06	5.02938e+06	5.06886e+06	5.03073e+06	-4.226	5.03172e+06	5.03162e+06	2.0615
5.06736e+06	5.02938e+06	5.0682e+06	5.03036e+06	21.301	5.03055e+06	5.03052e+06	2.8334		5.06736e+06	5.02938e+06	5.0682e+06	5.03036e+06	21.301	5.02989e+06	5.02992e+06	11.7383
5.06736e+06	5.02938e+06	5.06886e+06	5.03087e+06	6.0614	5.03035e+06	5.0306e+06	26.632		5.06736e+06	5.02938e+06	5.06886e+06	5.03087e+06	6.0614
5.06736e+06	5.02938e+06	5.06898e+06	5.03084e+06	-4.579	5.03127e+06	5.03121e+06	2.6382		5.06736e+06	5.02938e+06	5.06898e+06	5.03084e+06	-4.579
5.06736e+06	5.02938e+06	5.0679e+06	5.02982e+06	-15.003	5.03156e+06	5.03172e+06	13.0415		5.06736e+06	5.02938e+06	5.0679e+06	5.02982e+06	-15.003
5.06736e+06	5.02938e+06	5.06848e+06	5.03026e+06	-20.038	5.031e+06	5.03098e+06	4.5646		5.06736e+06	5.02938e+06	5.06848e+06	5.03026e+06	-20.038
					5.0307e+06	5.03087e+06	17.393
					5.03086e+06	5.03147e+06	35.144
					5.02978e+06	5.02976e+06	1.0079
					5.03044e+06	5.03059e+06	18.827
					5.03072e+06	5.03069e+06	4.0056
					5.03029e+06	5.03048e+06	23.29
					5.02957e+06	5.02959e+06	15.5003
					5.0312e+06	5.0312e+06	6.20936
					5.0305e+06	5.03029e+06	-17.848
					5.02977e+06	5.02985e+06	22.192
					5.0304e+06	5.03046e+06	11.8299
