# Supplementary material for: A FRET-based study reveals site-specific regulation of spindle position checkpoint proteins at yeast centrosomes
Source: eLife. 2016 May 9;5:e14029. doi: 10.7554/eLife.14029 (PMC4878874; doi:10.7554/eLife.14029)
Supplement: Figure 3—source data 6. — DOI: http://dx.doi.org/10.7554/eLife.14029.024 [file elife-14029-fig3-data6.xlsx]

## Sheet: Description
Description:
List of Abbreviations
Raw Mean Fluoresence Intensity before bleach (Donor/Aceptor): FL (DA) bb
Raw Mean Fluoresence Intensity before bleach (Donor only): FL (D) bb
Raw Mean Fluoresence Intensity before bleach (Background): FL (bg) bb
Raw Mean Fluoresence Intensity after bleach (Donor/Aceptor): FL (DA) ab
Raw Mean Fluoresence Intensity after bleach (Donor only): FL (D) ab
RawMean Fluoresence Intensity after bleach (Background): FL (bg) ab
Calculated FRET efficiency % for the indicated Donor/Acceptor pair) : FRET % (DA)
Calculated FRET efficiency % background for Donor only sample : FRET % (D)
daughter SPB: dSPB
mother SPB: mSPB
P-value for the indicated pair FRET % (DA) and FRET % (D) according to students t-test: P

## Sheet: Experiment 1
pair: Spc72-mTUR Bfa1-EYFP									pair: Spc72-mTUR Bfa1-EYFP
condition: kar9∆ aligned spindle									condition: kar9∆ misaligned spindle
p:	0.00162156								p:	0.845353
FL(bg)bb	FL(bg)ab	FL(DA)bb normal saligned	FL(DA)ab normal aligned	FRET(DA) % normal aligned	FL(D)bb dSPB	FL(D)ab dSPB	FRET(D) %		FL(bg)bb	FL(bg)ab	FL(DA)bb misaligned	FL(DA)ab misaligned	FRET(DA) % misaligned	FL(D)bb dSPB	FL(D)ab dSPB	FRET(D) %
4.59067e+06	4.43966e+06	4.59131e+06	4.44016e+06	-20.5	4.59074e+06	4.43972e+06	-4.5		4.59067e+06	4.43966e+06	4.59122e+06	4.44021e+06	6.5	4.59074e+06	4.43972e+06	-4.5
4.59067e+06	4.43966e+06	4.59159e+06	4.43966e+06	16.5	4.59095e+06	4.43998e+06	20.5		4.59067e+06	4.43966e+06	4.59158e+06	4.44044e+06	-9.5	4.59095e+06	4.43998e+06	20.5
4.59067e+06	4.43966e+06	4.59073e+06	4.43975e+06	39.5	4.59107e+06	4.43994e+06	-35.5		4.59067e+06	4.43966e+06	4.59113e+06	4.44003e+06	-15.5	4.59107e+06	4.43994e+06	-35.5
4.59067e+06	4.43966e+06	4.59095e+06	4.44002e+06	29.5	4.59161e+06	4.44033e+06	-32.5		4.59067e+06	4.43966e+06	4.59124e+06	4.44013e+06	-12.5	4.59161e+06	4.44033e+06	-32.5
4.59067e+06	4.43966e+06	4.59147e+06	4.44052e+06	13.5	4.59067e+06	4.43966e+06	10.5		4.59067e+06	4.43966e+06	4.59127e+06	4.44015e+06	-16.5	4.59067e+06	4.43966e+06	10.5
4.59067e+06	4.43966e+06	4.59153e+06	4.43966e+06	55.5	4.59093e+06	4.43995e+06	16.5		4.59067e+06	4.43966e+06	4.5908e+06	4.43979e+06	3.5	4.59093e+06	4.43995e+06	16.5
4.59067e+06	4.43966e+06	4.59092e+06	4.44024e+06	64.5	4.59067e+06	4.43966e+06	-11.5		4.59067e+06	4.43966e+06	4.59111e+06	4.44013e+06	13.5	4.59067e+06	4.43966e+06	-11.5
4.59067e+06	4.43966e+06	4.59093e+06	4.44e+06	31.5	4.59092e+06	4.43982e+06	-41.5		4.59067e+06	4.43966e+06	4.59139e+06	4.44048e+06	18.5	4.59092e+06	4.43982e+06	-41.5
4.59067e+06	4.43966e+06	4.59104e+06	4.44006e+06	14.5	4.59144e+06	4.4404e+06	3.5		4.59067e+06	4.43966e+06	4.59102e+06	4.43987e+06	-58.5	4.59144e+06	4.4404e+06	3.5
4.59067e+06	4.43966e+06	4.59106e+06	4.44014e+06	27.5	4.59128e+06	4.44034e+06	16.5		4.59067e+06	4.43966e+06	4.59108e+06	4.44008e+06	8.5	4.59128e+06	4.44034e+06	16.5
4.59067e+06	4.43966e+06	4.59132e+06	4.44024e+06	-4.5	4.59067e+06	4.43966e+06	-17.5		4.59067e+06	4.43966e+06	4.59123e+06	4.44015e+06	-6.5	4.59067e+06	4.43966e+06	-17.5
4.59067e+06	4.43966e+06	4.59067e+06	4.43966e+06	-0.5	4.59067e+06	4.43966e+06	-6.5		4.59067e+06	4.43966e+06	4.59122e+06	4.4402e+06	5.5	4.59067e+06	4.43966e+06	-6.5
4.59067e+06	4.43966e+06	4.59067e+06	4.43966e+06	10.5	4.59067e+06	4.44054e+06	-7.5		4.59067e+06	4.43966e+06	4.59135e+06	4.44036e+06	10.5	4.59067e+06	4.44054e+06	-7.5
4.59067e+06	4.43966e+06	4.59082e+06	4.43989e+06	43.5	4.59067e+06	4.43966e+06	8.5		4.59067e+06	4.43966e+06	4.59067e+06	4.43966e+06	4.5	4.59067e+06	4.43966e+06	8.5
4.59067e+06	4.43966e+06	4.59097e+06	4.43995e+06	5.5	4.59087e+06	4.43987e+06	13.5		4.59067e+06	4.43966e+06	4.59108e+06	4.4401e+06	14.5	4.59087e+06	4.43987e+06	13.5
4.59067e+06	4.43966e+06	4.59133e+06	4.44052e+06	30.5	4.59128e+06	4.44034e+06	17.5		4.59067e+06	4.43966e+06	4.59088e+06	4.43986e+06	2.5	4.59128e+06	4.44034e+06	17.5
4.59067e+06	4.43966e+06	4.59085e+06	4.43986e+06	18.5	4.59135e+06	4.44033e+06	4.5		4.59067e+06	4.43966e+06	4.59099e+06	4.43991e+06	-19.5	4.59135e+06	4.44033e+06	4.5
4.59067e+06	4.43966e+06	4.59127e+06	4.44034e+06	18.5	4.59067e+06	4.44039e+06	-38.5		4.59067e+06	4.43966e+06	4.59067e+06	4.43966e+06	0.5	4.59067e+06	4.44039e+06	-38.5
4.59067e+06	4.43966e+06	4.59125e+06	4.44012e+06	-19.5	4.59067e+06	4.43966e+06	-5.5		4.59067e+06	4.43966e+06	4.59158e+06	4.43966e+06	19.5	4.59067e+06	4.43966e+06	-5.5
4.59067e+06	4.43966e+06	4.5912e+06	4.44009e+06	-15.5	4.59132e+06	4.44017e+06	-19.5		4.59067e+06	4.43966e+06	4.59105e+06	4.43998e+06	-10.5	4.59132e+06	4.44017e+06	-19.5
4.59067e+06	4.43966e+06	4.59126e+06	4.44036e+06	22.5	4.59109e+06	4.44007e+06	5.5		4.59067e+06	4.43966e+06	4.59067e+06	4.43966e+06	2.5	4.59109e+06	4.44007e+06	5.5
4.59067e+06	4.43966e+06	4.59088e+06	4.43994e+06	31.5	4.59122e+06	4.44034e+06	26.5		4.59067e+06	4.43966e+06	4.59067e+06	4.43966e+06	1.5	4.59122e+06	4.44034e+06	26.5
4.59067e+06	4.43966e+06	4.59086e+06	4.43993e+06	37.5	4.59067e+06	4.43966e+06	3.5		4.59067e+06	4.43966e+06	4.59067e+06	4.4406e+06	-2.5	4.59067e+06	4.43966e+06	3.5
4.59067e+06	4.43966e+06	4.59152e+06	4.44034e+06	-18.5	4.59117e+06	4.4402e+06	14.5		4.59067e+06	4.43966e+06	4.5916e+06	4.43966e+06	16.5	4.59117e+06	4.4402e+06	14.5
4.59067e+06	4.43966e+06	4.59166e+06	4.43966e+06	26.5	4.59074e+06	4.43974e+06	31.5		4.59067e+06	4.43966e+06				4.59074e+06	4.43974e+06	31.5
4.59067e+06	4.43966e+06	4.59092e+06	4.4399e+06	1.5	4.5908e+06	4.43981e+06	20.5		4.59067e+06	4.43966e+06				4.5908e+06	4.43981e+06	20.5
4.59067e+06	4.43966e+06	4.59067e+06	4.43966e+06	0.5	4.59093e+06	4.43983e+06	-46.5		4.59067e+06	4.43966e+06				4.59093e+06	4.43983e+06	-46.5
4.59067e+06	4.43966e+06	4.59145e+06	4.44027e+06	-20.5	4.59144e+06	4.44051e+06	16.5		4.59067e+06	4.43966e+06				4.59144e+06	4.44051e+06	16.5
4.59067e+06	4.43966e+06	4.59124e+06	4.44025e+06	11.5	4.59093e+06	4.43987e+06	-11.5		4.59067e+06	4.43966e+06				4.59093e+06	4.43987e+06	-11.5
4.59067e+06	4.43966e+06	4.59091e+06	4.44013e+06	57.5	4.59111e+06	4.44006e+06	-1.5		4.59067e+06	4.43966e+06				4.59111e+06	4.44006e+06	-1.5
4.59067e+06	4.43966e+06	4.59067e+06	4.43966e+06	3.5	4.59094e+06	4.43998e+06	22.5		4.59067e+06	4.43966e+06				4.59094e+06	4.43998e+06	22.5
4.59067e+06	4.43966e+06	4.59128e+06	4.44026e+06	5.5	4.5913e+06	4.4401e+06	-36.5		4.59067e+06	4.43966e+06				4.5913e+06	4.4401e+06	-36.5
4.59067e+06	4.43966e+06	4.59141e+06	4.44035e+06	0.5	4.59126e+06	4.44037e+06	22.5		4.59067e+06	4.43966e+06				4.59126e+06	4.44037e+06	22.5
4.59067e+06	4.43966e+06	4.59117e+06	4.44011e+06	-4.5	4.59165e+06	4.4406e+06	1.5		4.59067e+06	4.43966e+06				4.59165e+06	4.4406e+06	1.5
4.59067e+06	4.43966e+06	4.59077e+06	4.43983e+06	49.5	4.59102e+06	4.44e+06	4.5		4.59067e+06	4.43966e+06				4.59102e+06	4.44e+06	4.5
4.59067e+06	4.43966e+06	4.59067e+06	4.44059e+06	-17.5	4.59093e+06	4.43989e+06	-1.5		4.59067e+06	4.43966e+06				4.59093e+06	4.43989e+06	-1.5
4.59067e+06	4.43966e+06	4.59067e+06	4.44065e+06	-2.5	4.59105e+06	4.43994e+06	-28.5		4.59067e+06	4.43966e+06				4.59105e+06	4.43994e+06	-28.5
4.59067e+06	4.43966e+06	4.5914e+06	4.4405e+06	20.5	4.59067e+06	4.43966e+06	-3.5		4.59067e+06	4.43966e+06				4.59067e+06	4.43966e+06	-3.5
4.59067e+06	4.43966e+06	4.59136e+06	4.44025e+06	-8.5	4.59067e+06	4.43966e+06	-6.5		4.59067e+06	4.43966e+06				4.59067e+06	4.43966e+06	-6.5
4.59067e+06	4.43966e+06	4.59092e+06	4.43994e+06	19.5					4.59067e+06	4.43966e+06
4.59067e+06	4.43966e+06	4.59067e+06	4.43966e+06	-5.5					4.59067e+06	4.43966e+06

## Sheet: Experiment2
pair: Spc72-mTUR Bfa1-EYFP									pair: Spc72-mTUR Bfa1-EYFP
condition: kar9∆ aligned spindle									condition: kar9∆ misaligned spindle
P=0,003									P=0,201
FL(bg)bb	FL(bg)ab	FL(D)bb	FL(D)ab	FRET (D) %	FL(DA)bb	FL(DA)ab	FRET(DA) %		FL(bg)bb	FL(bg)ab	FL(D)bb	FL(D)ab	FRET (D) %	FL(DA)bb	FL(DA)ab	FRET(DA) %
7.605e+06	7.55722e+06	7.86296e+06	7.7618e+06	-47.376	7.60578e+06	7.55778e+06	-0.93		7.605e+06	7.55722e+06	7.86296e+06	7.7618e+06	-47.376	7.60649e+06	7.55893e+06	15.787
7.605e+06	7.55722e+06	8.157e+06	8.07833e+06	-13.026	7.60634e+06	7.55852e+06	6.526		7.605e+06	7.55722e+06	8.157e+06	8.07833e+06	-13.026	7.60579e+06	7.55797e+06	-2.12
7.605e+06	7.55722e+06	7.96072e+06	8.04253e+06	18.927	7.60546e+06	7.55781e+06	25.704		7.605e+06	7.55722e+06	7.96072e+06	8.04253e+06	18.927	7.60566e+06	7.55803e+06	21.002
7.605e+06	7.55722e+06	8.11563e+06	8.15558e+06	8.7464	7.60525e+06	7.55744e+06	-9.164		7.605e+06	7.55722e+06	8.11563e+06	8.15558e+06	8.7464	7.60551e+06	7.55773e+06	3.4229
7.605e+06	7.55722e+06	7.9939e+06	8.1935e+06	33.441	7.60529e+06	7.55767e+06	38.4		7.605e+06	7.55722e+06	7.9939e+06	8.1935e+06	33.441	7.60588e+06	7.55811e+06	3.9067
7.605e+06	7.55722e+06	7.63991e+06	7.65373e+06	16.396	7.60572e+06	7.55787e+06	-7.6664		7.605e+06	7.55722e+06	7.63991e+06	7.65373e+06	16.396	7.60584e+06	7.55806e+06	2.43597
7.605e+06	7.55722e+06	7.78597e+06	7.71969e+06	-38.723	7.60513e+06	7.55738e+06	25.335		7.605e+06	7.55722e+06	7.78597e+06	7.71969e+06	-38.723	7.60586e+06	7.55801e+06	-5.8882
7.605e+06	7.55722e+06	7.78297e+06	7.72017e+06	-36.464	7.60611e+06	7.55853e+06	17.302		7.605e+06	7.55722e+06	7.78297e+06	7.72017e+06	-36.464	7.60558e+06	7.5578e+06	2.99548
7.605e+06	7.55722e+06	7.63033e+06	7.62384e+06	-7.6635	7.60659e+06	7.55895e+06	10.6138		7.605e+06	7.55722e+06	7.63033e+06	7.62384e+06	-7.6635	7.60527e+06	7.55749e+06	5.0715
7.605e+06	7.55722e+06	8.25883e+06	8.2719e+06	3.8986	7.60557e+06	7.55785e+06	11.7973		7.605e+06	7.55722e+06	8.25883e+06	8.2719e+06	3.8986	7.6056e+06	7.55774e+06	-13.514
7.605e+06	7.55722e+06	8.47417e+06	8.45556e+06	-0.0023	7.60592e+06	7.55823e+06	12.0323		7.605e+06	7.55722e+06	8.47417e+06	8.45556e+06	-0.0023	7.60583e+06	7.55803e+06	0.9655
7.605e+06	7.55722e+06				7.60523e+06	7.5575e+06	20.876		7.605e+06	7.55722e+06				7.60536e+06	7.55754e+06	-8.286
7.605e+06	7.55722e+06				7.60635e+06	7.55856e+06	1.60297		7.605e+06	7.55722e+06				7.60578e+06	7.55803e+06	6.1097
7.605e+06	7.55722e+06				7.60622e+06	7.5586e+06	14.228		7.605e+06	7.55722e+06				7.60528e+06	7.55755e+06	19.545
7.605e+06	7.55722e+06				7.6052e+06	7.55747e+06	25.483		7.605e+06	7.55722e+06				7.60594e+06	7.55803e+06	-13.671
7.605e+06	7.55722e+06				7.60603e+06	7.55817e+06	-5.0715		7.605e+06	7.55722e+06				7.60612e+06	7.55811e+06	-22.453
7.605e+06	7.55722e+06				7.60545e+06	7.55785e+06	30.659		7.605e+06	7.55722e+06				7.60575e+06	7.55808e+06	15.158
7.605e+06	7.55722e+06				7.60609e+06	7.55855e+06	20.922		7.605e+06	7.55722e+06				7.606e+06	7.55823e+06	3.7361
7.605e+06	7.55722e+06				7.6052e+06	7.55753e+06	39.01		7.605e+06	7.55722e+06				7.60615e+06	7.55846e+06	9.9654
7.605e+06	7.55722e+06				7.60568e+06	7.55791e+06	3.4086		7.605e+06	7.55722e+06				7.60527e+06	7.55748e+06	2.65582
7.605e+06	7.55722e+06				7.60561e+06	7.55807e+06	30.476		7.605e+06	7.55722e+06				7.60588e+06	7.55807e+06	-0.3094
7.605e+06	7.55722e+06				7.60512e+06	7.55746e+06	55.064		7.605e+06	7.55722e+06				7.60584e+06	7.55816e+06	13.909
7.605e+06	7.55722e+06				7.60556e+06	7.55791e+06	21.569
7.605e+06	7.55722e+06				7.6062e+06	7.55834e+06	-4.2875
7.605e+06	7.55722e+06				7.60554e+06	7.55769e+06	-10.219
7.605e+06	7.55722e+06				7.6056e+06	7.55782e+06	2.42303
7.605e+06	7.55722e+06				7.60511e+06	7.55742e+06	48.967
7.605e+06	7.55722e+06				7.60519e+06	7.55769e+06	61.872
7.605e+06	7.55722e+06				7.60545e+06	7.55809e+06	50.917
