# Supplementary material for: A FRET-based study reveals site-specific regulation of spindle position checkpoint proteins at yeast centrosomes
Source: eLife. 2016 May 9;5:e14029. doi: 10.7554/eLife.14029 (PMC4878874; doi:10.7554/eLife.14029)
Supplement: Figure 3—source data 7. — DOI: http://dx.doi.org/10.7554/eLife.14029.025 [file elife-14029-fig3-data7.xlsx]

## Sheet: Description
Description:
List of Abbreviations
Raw Mean Fluoresence Intensity before bleach (Donor/Aceptor): FL (DA) bb
Raw Mean Fluoresence Intensity before bleach (Donor only): FL (D) bb
Raw Mean Fluoresence Intensity before bleach (Background): FL (bg) bb
Raw Mean Fluoresence Intensity after bleach (Donor/Aceptor): FL (DA) ab
Raw Mean Fluoresence Intensity after bleach (Donor only): FL (D) ab
RawMean Fluoresence Intensity after bleach (Background): FL (bg) ab
Calculated FRET efficiency % for the indicated Donor/Acceptor pair) : FRET % (DA)
Calculated FRET efficiency % background for Donor only sample : FRET % (D)
daughter SPB: dSPB
mother SPB: mSPB
P-value for the indicated pair FRET % (DA) and FRET % (D) according to students t-test: P

## Sheet: Experiment 1
pair: Nud1-mTUR Bfa1-EYFP									pair: Nud1-mTUR Bfa1-EYFP
condition:kar9∆ kin4∆ misaligned									condition:kar9∆ kin4∆ normal aligned
p=	4.60779e-08								p=	5.5525e-07
FL(bg)bb	FL(bg)ab	FL(DA)bb misaligned	FL(DA)ab misaligned	FRET(DA) % misaligned	FL(D)bb dSPB	FL(D)ab dSPB	FRET(D) %		FL(bg)bb	FL(bg)ab	FL(DA)bb normal saligned	FL(DA)ab normal aligned	FRET(DA) % normal aligned	FL(D)bb dSPB	FL(D)ab dSPB	FRET(D) %
6025331	6146539	6.02533e+06	6.14654e+06	22	6.02533e+06	6.14654e+06	0		6025331	6146539	6.02533e+06	6.14654e+06	11	6.02533e+06	6.14654e+06	0
6025331	6146539	6.02533e+06	6.14654e+06	8	6.0261e+06	6147297	18		6025331	6146539	6.02533e+06	6.14654e+06	36	6.0261e+06	6147297	18
6025331	6146539	6.02533e+06	6.14654e+06	14	6.02611e+06	6.14727e+06	12		6025331	6146539	6.0256e+06	6.14685e+06	34	6.02611e+06	6.14727e+06	12
6025331	6146539	6.02533e+06	6.14654e+06	13	6.02533e+06	6.14654e+06	31		6025331	6146539	6.02565e+06	6.14686e+06	19	6.02533e+06	6.14654e+06	31
6025331	6146539	6.02613e+06	6.14746e+06	33	6.02628e+06	6.14734e+06	0		6025331	6146539	6.02564e+06	6.1469e+06	31	6.02628e+06	6.14734e+06	0
6025331	6146539	6.02548e+06	6.14666e+06	-1	6.02533e+06	6.14654e+06	14		6025331	6146539	6.02533e+06	6.14654e+06	18	6.02533e+06	6.14654e+06	14
6025331	6146539	6.02558e+06	6.14689e+06	48	6.02597e+06	6.14699e+06	-24		6025331	6146539	6.02538e+06	6.14665e+06	74	6.02597e+06	6.14699e+06	-24
6025331	6146539	6.02565e+06	6.14707e+06	58	6.02615e+06	6.14743e+06	27		6025331	6146539	6.0258e+06	6.14695e+06	5	6.02615e+06	6.14743e+06	27
6025331	6146539	6.02608e+06	6.14746e+06	38	6.02533e+06	6147457	0		6025331	6146539	6.02533e+06	6.14654e+06	20	6.02533e+06	6147457	0
6025331	6146539	6.02533e+06	6.14654e+06	22	6.02555e+06	6.14674e+06	7		6025331	6146539	6.02533e+06	6.14654e+06	26	6.02555e+06	6.14674e+06	7
6025331	6146539	6.02613e+06	6.14727e+06	10	6.02614e+06	6.14718e+06	-8		6025331	6146539	6.02622e+06	6.14736e+06	10	6.02614e+06	6.14718e+06	-8
6025331	6146539	6.02533e+06	6.14654e+06	25	6.02542e+06	6.14663e+06	26		6025331	6146539	6.02552e+06	6.14688e+06	63	6.02542e+06	6.14663e+06	26
6025331	6146539	6.02533e+06	6.14654e+06	39	6.02533e+06	6.14654e+06	26		6025331	6146539	6.02533e+06	6.14654e+06	26	6.02533e+06	6.14654e+06	26
6025331	6146539	6.02533e+06	6.14654e+06	26	6.02587e+06	6.14692e+06	-25		6025331	6146539	6.02618e+06	6.14732e+06	11	6.02587e+06	6.14692e+06	-25
6025331	6146539	6.02611e+06	6.14742e+06	30	6.02533e+06	6.14654e+06	-10		6025331	6146539	6.02533e+06	6.14654e+06	17	6.02533e+06	6.14654e+06	-10
6025331	6146539	6.02533e+06	6.14654e+06	32	6.02533e+06	6.14654e+06	-6		6025331	6146539	6.02625e+06	6.14743e+06	15	6.02533e+06	6.14654e+06	-6
6025331	6146539	6.02565e+06	6.1468e+06	-4	6.02533e+06	6.14654e+06	-21		6025331	6146539	6.0256e+06	6.14684e+06	31	6.02533e+06	6.14654e+06	-21
6025331	6146539	6.02556e+06	6.147e+06	68	6.02614e+06	6.14722e+06	1		6025331	6146539	6.02591e+06	6.14727e+06	41	6.02614e+06	6.14722e+06	1
6025331	6146539	6.02591e+06	6.14715e+06	24	6.02533e+06	6.14654e+06	11		6025331	6146539	6.02622e+06	6.14735e+06	10	6.02533e+06	6.14654e+06	11
6025331	6146539	6.02571e+06	6.14685e+06	-1	6.02551e+06	6.14676e+06	39		6025331	6146539	6.02533e+06	6.14654e+06	11	6.02551e+06	6.14676e+06	39
6025331	6146539	6.02625e+06	6.14753e+06	26	6.02579e+06	6.14694e+06	5		6025331	6146539	6.02619e+06	6.14654e+06	36	6.02579e+06	6.14694e+06	5
6025331	6146539	6.02557e+06	6.14705e+06	73	6.02579e+06	6.14694e+06	5		6025331	6146539	6.02533e+06	6.14654e+06	27	6.02579e+06	6.14694e+06	5
6025331	6146539	6025725	6.14698e+06	29	6.02595e+06	6.14695e+06	-30		6025331	6146539	6.02577e+06	6.14715e+06	47	6.02595e+06	6.14695e+06	-30
6025331	6146539	6.02589e+06	6.14702e+06	2	6.02629e+06	6.14654e+06	37		6025331	6146539	6.02582e+06	6.14707e+06	28	6.02629e+06	6.14654e+06	37
6025331	6146539	6.0255e+06	6.14672e+06	25	6.02573e+06	6.1468e+06	-32		6025331	6146539	6.02576e+06	6.1469e+06	-2	6.02573e+06	6.1468e+06	-32
6025331	6146539	6.02566e+06	6.14693e+06	35	6.02533e+06	6.14654e+06	10		6025331	6146539	6.02533e+06	6.14654e+06	15	6.02533e+06	6.14654e+06	10
6025331	6146539	6.02549e+06	6.14674e+06	41	6.02533e+06	6.14654e+06	19		6025331	6146539	6.02533e+06	6.14654e+06	6	6.02533e+06	6.14654e+06	19
6025331	6146539	6.02602e+06	6.14719e+06	12	6.02569e+06	6.14677e+06	-34		6025331	6146539	6.02558e+06	6.14679e+06	18	6.02569e+06	6.14677e+06	-34
6025331	6146539	6.02626e+06	6.14748e+06	20	6.02562e+06	6.14672e+06	-40		6025331	6146539	6.02555e+06	6.14679e+06	33	6.02562e+06	6.14672e+06	-40
6025331	6146539	6.02621e+06	6.14752e+06	29	6.02563e+06	6.14676e+06	-20		6025331	6146539	6.02559e+06	6.14684e+06	33	6.02563e+06	6.14676e+06	-20
6025331	6146539	6.02533e+06	6.14654e+06	8	6.02533e+06	6.14654e+06	24		6025331	6146539				6.02533e+06	6.14654e+06	24
6025331	6146539	6.02533e+06	6.14654e+06	-6	6.02533e+06	6.14654e+06	-6		6025331	6146539				6.02533e+06	6.14654e+06	-6
6025331	6146539	6.02533e+06	6.14654e+06	29	6.02533e+06	6.14654e+06	16		6025331	6146539				6.02533e+06	6.14654e+06	16
6025331	6146539	6.02533e+06	6.14654e+06	16	6.0262e+06	6.14724e+06	-6		6025331	6146539				6.0262e+06	6.14724e+06	-6
6025331	6146539	6.02616e+06	6.14742e+06	25	6.02574e+06	6.14684e+06	-17		6025331	6146539				6.02574e+06	6.14684e+06	-17
6025331	6146539	6.02533e+06	6.14654e+06	27	6.02533e+06	6.14654e+06	15		6025331	6146539				6.02533e+06	6.14654e+06	15
6025331	6146539	6.02624e+06	6.14654e+06	34	6.02597e+06	6.14699e+06	-21		6025331	6146539				6.02597e+06	6.14699e+06	-21
6025331	6146539	6.02582e+06	6.14709e+06	31	6.02612e+06	6.14719e+06	-2		6025331	6146539				6.02612e+06	6.14719e+06	-2
6025331	6146539	6.02556e+06	6.1469e+06	55	6.0255e+06	6.14664e+06	-39		6025331	6146539				6.0255e+06	6.14664e+06	-39
6025331	6146539				6.02592e+06	6.14694e+06	-29		6025331	6146539				6.02592e+06	6.14694e+06	-29
6025331	6146539				6.02611e+06	6.14706e+06	-30		6025331	6146539				6.02611e+06	6.14706e+06	-30

## Sheet: Quantif. 2
pair: Nud1-mTUR Bfa1-EYFP									pair: Nud1-mTUR Bfa1-EYFP
condition: kar9∆ kin4∆aligned spindle									condition: kar9∆ kin4∆ misaligned spindle
P=0,00000012									P=0,0000099
FL(bg)bb	FL(bg)ab	FL(D)bb	FL(D)ab	FRET (D) %	FL(DA)bb	FL(DA)ab	FRET(DA) %		FL(bg)bb	FL(bg)ab	FL(D)bb	FL(D)ab	FRET (D) %	FL(DA)bb	FL(DA)ab	FRET(DA) %
6180.9	6164.6	8222	8214	0.404997	7185	7461	22.5471		6180.9	6164.6	8222	8214	0.404997	7142	7204	7.53319
6180.9	6164.6	6559	6459	-28.4307	7192	7204	2.72272		6180.9	6164.6	6559	6459	-28.4307	6995	6990	1.36903
6180.9	6164.6	6630	6486	-39.7324	6403	6394	3.18221		6180.9	6164.6	6630	6486	-39.7324	8408	8398	0.282081
6180.9	6164.6	6817	6814	2.04804	7163	7236	8.33489		6180.9	6164.6	6817	6814	2.04804	6951	7015	9.44262
6180.9	6164.6	7319	7202	-9.70696	7387	7315	-4.84179		6180.9	6164.6	7319	7202	-9.70696	7691	7786	6.86444
6180.9	6164.6	8084	8144	3.8547	7750	7601	-9.23837		6180.9	6164.6	8084	8144	3.8547	7270	7294	3.56827
6180.9	6164.6	7125	7079	-3.24803	6586	6578	2.00774		6180.9	6164.6	7125	7079	-3.24803	7241	7406	14.6045
6180.9	6164.6	7533	7372	-11.9844	7234	7274	5.07482		6180.9	6164.6	7533	7372	-11.9844	6946	6976	5.70619
6180.9	6164.6	7051	7002	-3.90494	7083	7152	8.63885		6180.9	6164.6	7051	7002	-3.90494	6748	6909	23.8178
6180.9	6164.6	6494	6449	-10.0914	7703	7693	0.412196		6180.9	6164.6	6494	6449	-10.0914	6480	6566	25.4858
6180.9	6164.6	6784	6671	-19.0956	6502	6594	25.2212		6180.9	6164.6	6784	6671	-19.0956	6888	6816	-8.55081
6180.9	6164.6	6854	6863	3.62257	7129	7186	7.17642		6180.9	6164.6	6854	6863	3.62257	6940	6977	6.56081
6180.9	6164.6	7586	7479	-6.90049	6768	6852	14.5912		6180.9	6164.6	7586	7479	-6.90049	6747	6942	27.1803
6180.9	6164.6	6893	6861	-2.25445	7008	7253	24.0077		6180.9	6164.6	6893	6861	-2.25445	6400	6477	29.8656
6180.9	6164.6	8416	8227	-8.37374	7894	7977	5.47892		6180.9	6164.6	8416	8227	-8.37374	7110	7286	17.1482
6180.9	6164.6	7328	7367	4.59914	7603	7644	3.87319		6180.9	6164.6	7328	7367	4.59914	6791	6868	13.2641
6180.9	6164.6	6619	6561	-10.5197	7097	7066	-1.6308		6180.9	6164.6	6619	6561	-10.5197	6558	6608	14.9526
6180.9	6164.6	7758	7869	7.4689	6753	6768	5.18727		6180.9	6164.6	7758	7869	7.4689	6757	6759	3.07873
6180.9	6164.6	6308	6263	-29.1667	6590	6561	-3.20383		6180.9	6164.6	6308	6263	-29.1667	6999	6812	-26.367
6180.9	6164.6	7173	7058	-11.0477	6637	6698	14.4919		6180.9	6164.6	7173	7058	-11.0477	6364	6378	14.1987
6180.9	6164.6	6685	6682	2.57055	6825	6790	-2.99009		6180.9	6164.6	6685	6682	2.57055	6902	6946	7.71692
6180.9	6164.6	7867	7681	-11.191	7178	7195	3.23175		6180.9	6164.6	7867	7681	-11.191	7288	7328	4.83926
6180.9	6164.6	6481	6445	-7.02568	7074	7318	22.5681		6180.9	6164.6	6481	6445	-7.02568	7164	7287	12.4109
6180.9	6164.6	6921	6759	-24.5121	6896	6944	8.24994		6180.9	6164.6	6921	6759	-24.5121
6180.9	6164.6	6842	6803	-3.55576	6582	6635	14.7321		6180.9	6164.6	6842	6803	-3.55576
6180.9	6164.6	6712	6630	-14.1169	7367	7264	-7.88612		6180.9	6164.6	6712	6630	-14.1169
6180.9	6164.6	7116	6971	-15.9598	7118	7331	19.6588		6180.9	6164.6	7116	6971	-15.9598
6180.9	6164.6	6545	6593	15.0093	6900	6981	11.9182		6180.9	6164.6	6545	6593	15.0093
6180.9	6164.6	6827	6951	17.8408	6549	6655	24.9388		6180.9	6164.6	6827	6951	17.8408
6180.9	6164.6	6436	6410	-3.95273	6708	6909	29.1913		6180.9	6164.6	6436	6410	-3.95273
6180.9	6164.6	6591	6564	-2.67902	6823	6855	6.99594		6180.9	6164.6	6591	6564	-2.67902
6180.9	6164.6	7294	7165	-11.2655	6700	6649	-7.1635		6180.9	6164.6	7294	7165	-11.2655
6180.9	6164.6	6651	6671	7.16825	6655	6715	13.8626		6180.9	6164.6	6651	6671	7.16825
6180.9	6164.6	7036	6999	-2.48082	7259	7275	2.90886		6180.9	6164.6	7036	6999	-2.48082
6180.9	6164.6				7259	7275	4.8592
6180.9	6164.6				6946	6956	3.32322
6180.9	6164.6				6980	6942	-2.79136
6180.9	6164.6				7218	7257	5.06225
6180.9	6164.6				6778	6876	16.0669
6180.9	6164.6				6905	7007	14.0432
6180.9	6164.6				6786	6942	22.1636
6180.9	6164.6				6736	6731	1.99506
6180.9	6164.6				6857	6878	5.22848
6180.9	6164.6				6896	7002	14.6047
6180.9	6164.6				6989	6925	-6.27301

## Sheet: Quantif. 3
pair: Nud1-mTUR Bfa1-EYFP									pair: Nud1-mTUR Bfa1-EYFP
condition: kar9∆ kin4∆aligned spindle									condition: kar9∆ kin4∆ misaligned spindle
P=0,0000011									P=0,000026
FL(bg)bb	FL(bg)ab	FL(D)bb	FL(D)ab	FRET (D) %	FL(DA)bb	FL(DA)ab	FRET(DA) %		FL(bg)bb	FL(bg)ab	FL(D)bb	FL(D)ab	FRET (D) %	FL(DA)bb	FL(DA)ab	FRET(DA) %
6062.25	6045.75	6574	6465	-22.0632	6282	6416	40.6482		6062.25	6045.75	6574	6465	-22.0632	7721	7910	11.0232
6062.25	6045.75	7076	7146	7.86185	7868	7882	1.66099		6062.25	6045.75	7076	7146	7.86185	6662	6746	14.352
6062.25	6045.75	6463	6421	-6.79547	9042	9051	0.848515		6062.25	6045.75	6463	6421	-6.79547	6687	6716	6.78851
6062.25	6045.75	6759	6740	-0.360101	7098	7164	7.3776		6062.25	6045.75	6759	6740	-0.360101	7952	7918	-0.934704
6062.25	6045.75	7725	7663	-2.81342	6875	6858	-0.0615574		6062.25	6045.75	7725	7663	-2.81342	6741	6758	4.7034
6062.25	6045.75	6396	6309	-26.7806	6533	6536	3.97756		6062.25	6045.75	6396	6309	-26.7806	6805	6851	7.76156
6062.25	6045.75	6514	6470	-6.48203	6191	6170	-3.62173		6062.25	6045.75	6514	6470	-6.48203	6655	6661	3.65705
6062.25	6045.75	7108	7075	-1.60311	7014	7057	5.88381		6062.25	6045.75	7108	7075	-1.60311	6736	6746	3.78436
6062.25	6045.75	8346	8332	0.109349	7981	8078	5.58494		6062.25	6045.75	8346	8332	0.109349	6823	6811	0.588043
6062.25	6045.75	6898	6846	-4.43611	6775	7011	26.159		6062.25	6045.75	6898	6846	-4.43611	6743	6906	20.866
6062.25	6045.75	8997	8826	-5.55705	7304	7377	6.723		6062.25	6045.75	8997	8826	-5.55705	6895	6985	11.3388
6062.25	6045.75	7030	7020	0.66718	6718	6927	25.5887		6062.25	6045.75	7030	7020	0.66718	6944	6996	7.20863
6062.25	6045.75	7694	7715	2.24652	6978	6993	3.32542		6062.25	6045.75	7694	7715	2.24652	7221	7280	6.11708
6062.25	6045.75	6307	6279	-4.93033	7131	7213	8.43864		6062.25	6045.75	6307	6279	-4.93033	8808	8813	0.776945
6062.25	6045.75	6627	6667	9.09457	6889	6846	-3.31147		6062.25	6045.75	6627	6667	9.09457	8152	8107	-1.38266
6062.25	6045.75	7937	7875	-2.48736	6855	6979	15.0549		6062.25	6045.75	7937	7875	-2.48736	6180	6193	20.034
6062.25	6045.75	7618	7581	-1.33529	6830	6899	10.0205		6062.25	6045.75	7618	7581	-1.33529	6319	6307	1.72249
6062.25	6045.75	7221	7175	-2.61235	6167	6212	36.9925		6062.25	6045.75	7221	7175	-2.61235	6623	6640	5.63736
6062.25	6045.75	6896	6857	-2.7735	7482	7505	2.70687		6062.25	6045.75	6896	6857	-2.7735	6655	6705	10.0872
6062.25	6045.75	6478	6412	-13.5154	6628	6687	11.7739		6062.25	6045.75	6478	6412	-13.5154	6362	6408	17.2533
6062.25	6045.75	9219	8999	-6.89071	6475	6508	10.7085		6062.25	6045.75	9219	8999	-6.89071	6389	6551	35.329
6062.25	6045.75	8492	8544	2.74192	6427	6445	8.6412		6062.25	6045.75	8492	8544	2.74192	6589	6549	-4.66965
6062.25	6045.75	7886	7730	-8.28262	6871	6947	10.2635		6062.25	6045.75	7886	7730	-8.28262	6546	6565	6.83678
6062.25	6045.75	6362	6418	19.4762	6350	6442	27.3817		6062.25	6045.75	6362	6418	19.4762
6062.25	6045.75	7508	7457	-2.44464	6307	6366	23.5753		6062.25	6045.75	7508	7457	-2.44464
6062.25	6045.75	7181	6975	-20.3928	6249	6308	28.7893		6062.25	6045.75	7181	6975	-20.3928
6062.25	6045.75	7306	7253	-3.0234	6482	6487	4.87252		6062.25	6045.75	7306	7253	-3.0234
6062.25	6045.75	8050	8110	3.70595	6525	6448	-15.0404		6062.25	6045.75	8050	8110	3.70595
6062.25	6045.75	7177	7122	-3.57724	6427	6496	18.9895		6062.25	6045.75	7177	7122	-3.57724
6062.25	6045.75	6800	6718	-9.7434	6185	6202	21.44		6062.25	6045.75	6800	6718	-9.7434
6062.25	6045.75	7566	7574	1.60314	6514	6455	-10.3849		6062.25	6045.75	7566	7574	1.60314
6062.25	6045.75	6764	6850	12.7448	7694	7852	9.6609		6062.25	6045.75	6764	6850	12.7448
6062.25	6045.75	6995	6767	-29.3241	6656	6791	20.3287		6062.25	6045.75	6995	6767	-29.3241
6062.25	6045.75				7013	7094	9.30122
6062.25	6045.75				7284	7367	7.53075
6062.25	6045.75				6452	6607	30.5568
6062.25	6045.75				7065	7099	4.79468
6062.25	6045.75				7621	7514	-6.1638
6062.25	6045.75				6251	6310	28.5714
6062.25	6045.75				6724	6677	-4.83168
