# Supplementary material for: A FRET-based study reveals site-specific regulation of spindle position checkpoint proteins at yeast centrosomes
Source: eLife. 2016 May 9;5:e14029. doi: 10.7554/eLife.14029 (PMC4878874; doi:10.7554/eLife.14029)
Supplement: Figure 3—source data 8. — DOI: http://dx.doi.org/10.7554/eLife.14029.026 [file elife-14029-fig3-data8.xlsx]

## Sheet: Description
Description:
List of Abbreviations
Raw Mean Fluoresence Intensity before bleach (Donor/Aceptor): FL (DA) bb
Raw Mean Fluoresence Intensity before bleach (Donor only): FL (D) bb
Raw Mean Fluoresence Intensity before bleach (Background): FL (bg) bb
Raw Mean Fluoresence Intensity after bleach (Donor/Aceptor): FL (DA) ab
Raw Mean Fluoresence Intensity after bleach (Donor only): FL (D) ab
RawMean Fluoresence Intensity after bleach (Background): FL (bg) ab
Calculated FRET efficiency % for the indicated Donor/Acceptor pair) : FRET % (DA)
Calculated FRET efficiency % background for Donor only sample : FRET % (D)
daughter SPB: dSPB
mother SPB: mSPB
P-value for the indicated pair FRET % (DA) and FRET % (D) according to students t-test: P

## Sheet: Experiment 1
Spc72-mTUR Bfa1-EYFP									Spc72-mTUR Bfa1-EYFP
condition:kar9∆ kin4∆ misaligned									condition:kar9∆ kin4∆ normal aligned
p=	0.00190311								p=	0.0064454
FL(bg)bb	FL(bg)ab	FL(DA)bb misaligned	FL(DA)ab misaligned	FRET(DA) % misaligned	FL(D)bb dSPB	FL(D)ab dSPB	FRET(D) %		FL(bg)bb	FL(bg)ab	FL(DA)bb normal saligned	FL(DA)ab normal aligned	FRET(DA) % normal aligned	FL(D)bb dSPB	FL(D)ab dSPB	FRET(D) %
6025331	6146539	6.02563e+06	6.14677e+06	-3	6.02609e+06	6.1472e+06	12		6025331	6146539	6.02578e+06	6.14685e+06	-19	6.02609e+06	6.1472e+06	12
6025331	6146539	6.02621e+06	6.14719e+06	-9	6.02533e+06	6.14654e+06	31		6025331	6146539	6.02592e+06	6.14694e+06	-19	6.02533e+06	6.14654e+06	31
6025331	6146539	6.02582e+06	6.14696e+06	9	6.02605e+06	6.14718e+06	14		6025331	6146539	6.02583e+06	6.14696e+06	6	6.02605e+06	6.14718e+06	14
6025331	6146539	6.02598e+06	6.14725e+06	34	6.02573e+06	6.14684e+06	-7		6025331	6146539	6.02567e+06	6.14689e+06	29	6.02573e+06	6.14684e+06	-7
6025331	6146539	6.0256e+06	6.14685e+06	39	6.02553e+06	6.14668e+06	-17		6025331	6146539	6.02533e+06	6.14742e+06	8	6.02553e+06	6.14668e+06	-17
6025331	6146539	6.02583e+06	6.14688e+06	-19	6.02542e+06	6.14663e+06	25		6025331	6146539	6.02533e+06	6.14654e+06	19	6.02542e+06	6.14663e+06	25
6025331	6146539	6.02533e+06	6.14654e+06	13	6.02592e+06	6.14726e+06	45		6025331	6146539	6.02587e+06	6.147e+06	8	6.02592e+06	6.14726e+06	45
6025331	6146539	6.02596e+06	6.14728e+06	41	6.02618e+06	6.14735e+06	21		6025331	6146539	6.02573e+06	6.1469e+06	13	6.02618e+06	6.14735e+06	21
6025331	6146539	6.026e+06	6.14702e+06	-14	6.02533e+06	6.14654e+06	19		6025331	6146539	6.02533e+06	6.14743e+06	6	6.02533e+06	6.14654e+06	19
6025331	6146539	6.02629e+06	6.14733e+06	4	6.02619e+06	6.1473e+06	12		6025331	6146539	6.02533e+06	6.14654e+06	10	6.02619e+06	6.1473e+06	12
6025331	6146539	6.02533e+06	6.14654e+06	46	6.02533e+06	6.14724e+06	-21		6025331	6146539	6.02533e+06	6.14654e+06	19	6.02533e+06	6.14724e+06	-21
6025331	6146539	6.02533e+06	6.14654e+06	29	6.02613e+06	6.14715e+06	-5		6025331	6146539	6.02543e+06	6.14671e+06	66	6.02613e+06	6.14715e+06	-5
6025331	6146539	6.02595e+06	6.14703e+06	0	6.02611e+06	6.14711e+06	-11		6025331	6146539	6.02607e+06	6.14724e+06	21	6.02611e+06	6.14711e+06	-11
6025331	6146539	6.02631e+06	6.14654e+06	32	6.02595e+06	6.14706e+06	6		6025331	6146539	6.02533e+06	6.14749e+06	11	6.02595e+06	6.14706e+06	6
6025331	6146539	6.02533e+06	6.14654e+06	18	6.02604e+06	6.14718e+06	16		6025331	6146539	6.02616e+06	6.14729e+06	17	6.02604e+06	6.14718e+06	16
6025331	6146539	6.02579e+06	6.14703e+06	33	6.02533e+06	6.14654e+06	-4		6025331	6146539	6.02533e+06	6.14654e+06	28	6.02533e+06	6.14654e+06	-4
6025331	6146539	6.02533e+06	6.14746e+06	17	6.02533e+06	6.14654e+06	0		6025331	6146539	6.02533e+06	6.14654e+06	16	6.02533e+06	6.14654e+06	0
6025331	6146539	6.02584e+06	6.14708e+06	32	6.02533e+06	6.14654e+06	-14		6025331	6146539	6.02533e+06	6.14654e+06	20	6.02533e+06	6.14654e+06	-14
6025331	6146539	6.02533e+06	6.14654e+06	10	6.02628e+06	6.14732e+06	4		6025331	6146539	6.02616e+06	6.14733e+06	21	6.02628e+06	6.14732e+06	4
6025331	6146539	6.02614e+06	6.14734e+06	25	6.02533e+06	6.14654e+06	16		6025331	6146539	6.02598e+06	6.14724e+06	33	6.02533e+06	6.14654e+06	16
6025331	6146539	6.02533e+06	6.14654e+06	13	6.0255e+06	6.14675e+06	46		6025331	6146539	6.02533e+06	6.14654e+06	29	6.0255e+06	6.14675e+06	46
6025331	6146539	6.02585e+06	6.14721e+06	48	6.02567e+06	6.14675e+06	-41		6025331	6146539	6.02533e+06	6.14654e+06	13	6.02567e+06	6.14675e+06	-41
6025331	6146539	6.02555e+06	6.1468e+06	41	6.02572e+06	6.14679e+06	-28		6025331	6146539	6.02533e+06	6.14654e+06	4	6.02572e+06	6.14679e+06	-28
6025331	6146539	6.02533e+06	6.14654e+06	15	6.02589e+06	6.14688e+06	-39		6025331	6146539	6.02533e+06	6.14654e+06	10	6.02589e+06	6.14688e+06	-39
6025331	6146539	6.02573e+06	6.14686e+06	-1	6.02596e+06	6.14709e+06	12		6025331	6146539	6.02533e+06	6.14751e+06	13	6.02596e+06	6.14709e+06	12
6025331	6146539	6.02533e+06	6.14654e+06	15	6.02574e+06	6.1468e+06	-31		6025331	6146539	6.02623e+06	6.14724e+06	-2	6.02574e+06	6.1468e+06	-31
6025331	6146539	6026104	6.1474e+06	36	6.02612e+06	6.14716e+06	0		6025331	6146539	6.02533e+06	6.14752e+06	21	6.02612e+06	6.14716e+06	0
6025331	6146539	6.02573e+06	6.14685e+06	-1	6.02571e+06	6.1468e+06	-20		6025331	6146539	6.02533e+06	6.14654e+06	15	6.02571e+06	6.1468e+06	-20
6025331	6146539	6.0261e+06	6.14715e+06	0	6.02554e+06	6.1467e+06	-5		6025331	6146539	6.02585e+06	6.14689e+06	-22	6.02554e+06	6.1467e+06	-5
6025331	6146539	6.02579e+06	6.14698e+06	22	6.02607e+06	6.14697e+06	-47		6025331	6146539	6.02581e+06	6.14693e+06	4	6.02607e+06	6.14697e+06	-47
6025331	6146539	6.02533e+06	6.14654e+06	7	6.02595e+06	6.14698e+06	-15		6025331	6146539	6.02582e+06	6.14704e+06	30	6.02595e+06	6.14698e+06	-15
6025331	6146539	6.02601e+06	6.14701e+06	-18					6025331	6146539
6025331	6146539	6.02533e+06	6.14737e+06	-12					6025331	6146539
6025331	6146539	6.02533e+06	6.14737e+06	2					6025331	6146539
6025331	6146539	6.02533e+06	6.14654e+06	9					6025331	6146539
6025331	6146539	6.02533e+06	6.14654e+06	29					6025331	6146539
6025331	6146539	6.02533e+06	6.14654e+06	19					6025331	6146539
6025331	6146539	6.02533e+06	6.14654e+06	23					6025331	6146539
6025331	6146539	6026238	6.14742e+06	23					6025331	6146539
6025331	6146539	6.02583e+06	6.14691e+06	-10					6025331	6146539
6025331	6146539	6.02607e+06	6.14724e+06	21					6025331	6146539
6025331	6146539	6.02533e+06	6.14654e+06	13					6025331	6146539
6025331	6146539	6.02533e+06	6.14753e+06	1					6025331	6146539
6025331	6146539	6.02533e+06	6.14654e+06	6					6025331	6146539

## Sheet: Quantif. 2
pair: Spc72-mTUR Bfa1-EYFP									pair: Spc72-mTUR Bfa1-EYFP
condition: kar9∆ kin4∆ aligned spindle									condition: kar9∆ kin4∆ misaligned spindle
P=0,013*10¯¹²									P=0,066*10¯⁸
FL(bg)bb	FL(bg)ab	FL(D)bb	FL(D)ab	FRET (D) %	FL(DA)bb	FL(DA)ab	FRET(DA) %		FL(bg)bb	FL(bg)ab	FL(D)bb	FL(D)ab	FRET (D) %	FL(DA)bb	FL(DA)ab	FRET(DA) %
6035.09	6106.45	7017	6894	-24.6797	6292	6449	25		6035.09	6106.45	7017	6894	-24.6797	6220	6311	9.6
6035.09	6106.45	6742	6748	-10.1885	6778	6827	-3.10371		6035.09	6106.45	6742	6748	-10.1885	6266	6393	19.4162
6035.09	6106.45	6967	6958	-9.43739	6235	6364	22.3791		6035.09	6106.45	6967	6958	-9.43739	6215	6272	-8.67655
6035.09	6106.45	6962	7030	-0.364209	7003	7154	7.60219		6035.09	6106.45	6962	7030	-0.364209	6415	6623	26.452
6035.09	6106.45	6230	6292	-5.04655	8516	8539	-1.98819		6035.09	6106.45	6230	6292	-5.04655	6405	6622	28.249
6035.09	6106.45	6843	6869	-5.94897	8427	8910	14.6827		6035.09	6106.45	6843	6869	-5.94897	6748	6857	5.01453
6035.09	6106.45	9512	9595	0.333559	7349	7383	-2.92693		6035.09	6106.45	9512	9595	0.333559	6248	6372	19.822
6035.09	6106.45	6957	6942	-10.3362	8031	8331	10.2779		6035.09	6106.45	6957	6942	-10.3362	6900	6994	2.55045
6035.09	6106.45	7112	7104	-7.95589	7539	7567	-2.969		6035.09	6106.45	7112	7104	-7.95589	8722	8946	5.37538
6035.09	6106.45	7534	7493	-8.10386	6914	7008	2.51084		6035.09	6106.45	7534	7493	-8.10386	7535	7671	4.13132
6035.09	6106.45	6395	6409	-18.9603	8059	8294	7.48036		6035.09	6106.45	6395	6409	-18.9603	7232	7658	22.857
6035.09	6106.45	7193	7110	-15.3818	7684	7796	2.40517		6035.09	6106.45	7193	7110	-15.3818	7431	7410	-7.08557
6035.09	6106.45	6467	6493	-11.7357	8093	8219	2.58628		6035.09	6106.45	6467	6493	-11.7357	7068	7176	3.42541
6035.09	6106.45	6431	6434	-20.8715	7741	7933	6.60462		6035.09	6106.45	6431	6434	-20.8715	6817	6981	10.5925
6035.09	6106.45	6352	6398	-8.69972	6368	6507	16.8861		6035.09	6106.45	6352	6398	-8.69972	6826	6831	-9.15935
6035.09	6106.45	7387	7380	-6.15319	8098	8382	9.34441		6035.09	6106.45	7387	7380	-6.15319	6645	6822	14.7631
6035.09	6106.45	7924	7841	-8.89937	7367	7664	14.4867		6035.09	6106.45	7924	7841	-8.89937	6521	6553	-8.81515
6035.09	6106.45	7949	8060	2.02895	7118	7331	11.5664		6035.09	6106.45	7949	8060	2.02895	6595	6704	6.29849
6035.09	6106.45	6371	6386	-20.1626	6900	6981	1.10187		6035.09	6106.45	6371	6386	-20.1626	6499	6570	-0.0784468
6035.09	6106.45	6999	6874	-25.5833	6549	6655	6.31422		6035.09	6106.45	6999	6874	-25.5833	6248	6363	17.0092
6035.09	6106.45	6753	6780	-6.58658	6708	6909	16.1531		6035.09	6106.45	6753	6780	-6.58658	6577	6579	-14.6787
6035.09	6106.45	6480	6491	-15.6974	6823	6855	-5.25868		6035.09	6106.45	6480	6491	-15.6974	6400	6489	4.61027
6035.09	6106.45	7099	7117	-5.28068	6542	6607	-1.27134		6035.09	6106.45	7099	7117	-5.28068	6232	6393	31.2817
6035.09	6106.45	7074	7157	1.10765	7212	7424	10.6741		6035.09	6106.45	7074	7157	1.10765	7040	7252	12.2768
6035.09	6106.45	6363	6429	-1.66291	6675	6743	-0.52842		6035.09	6106.45	6363	6429	-1.66291	6942	6983	-3.46401
6035.09	6106.45	6294	6354	-4.59053	6975	7000	-5.18873		6035.09	6106.45	6294	6354	-4.59053	6310	6392	3.72493
6035.09	6106.45	7275	7278	-5.83534	6710	6839	7.86796		6035.09	6106.45	7275	7278	-5.83534
6035.09	6106.45	7121	7149	-4.1594	6879	7090	14.1972		6035.09	6106.45	7121	7149	-4.1594
6035.09	6106.45	7924	7841	-8.89937	6737	6991	20.6475		6035.09	6106.45	7924	7841	-8.89937
6035.09	6106.45	7949	8060	2.02895	6737	6891	10.533		6035.09	6106.45	7949	8060	2.02895
6035.09	6106.45	6580	6582	-14.5861	6751	6818	-0.613262		6035.09	6106.45	6580	6582	-14.5861
6035.09	6106.45	6375	6393	-18.6231	6750	6996	19.6321		6035.09	6106.45	6375	6393	-18.6231
6035.09	6106.45	7150	7152	-6.63421	6710	6819	5.28196		6035.09	6106.45	7150	7152	-6.63421
6035.09	6106.45	6550	6534	-20.4338	6966	7173	12.7174		6035.09	6106.45	6550	6534	-20.4338
6035.09	6106.45	8454	8199	-15.5965	7164	7230	-0.477385		6035.09	6106.45	8454	8199	-15.5965
6035.09	6106.45	6851	6847	-10.1768	6687	6800	6.00341		6035.09	6106.45	6851	6847	-10.1768
6035.09	6106.45	6947	6815	-28.7016					6035.09	6106.45	6947	6815	-28.7016
6035.09	6106.45	6354	6439	4.1006					6035.09	6106.45	6354	6439	4.1006
6035.09	6106.45	8380	8073	-19.24					6035.09	6106.45	8380	8073	-19.24
6035.09	6106.45	6688	6650	-20.1204					6035.09	6106.45	6688	6650	-20.1204
6035.09	6106.45	7458	7390	-10.8577					6035.09	6106.45	7458	7390	-10.8577
6035.09	6106.45	7694	7630	-8.88478					6035.09	6106.45	7694	7630	-8.88478

## Sheet: Quantif. 3
pair: Spc72-mTUR Bfa1-EYFP									pair: Spc72-mTUR Bfa1-EYFP
condition: kar9∆ kin4∆ aligned spindle									condition: kar9∆ kin4∆ misaligned spindle
P=0,017*10¯⁴									P=0,071*10¯⁴
FL(bg)bb	FL(bg)ab	FL(D)bb	FL(D)ab	FRET (D) %	FL(DA)bb	FL(DA)ab	FRET(DA) %		FL(bg)bb	FL(bg)ab	FL(D)bb	FL(D)ab	FRET (D) %	FL(DA)bb	FL(DA)ab	FRET(DA) %
6112.45	6110.55	6707	6684	-3.67787	7527	7691	10.4976		6112.45	6110.55	6707	6684	-3.67787	7404	7527	8.81843
6112.45	6110.55	7060	7005	-5.93556	7101	7195	8.84399		6112.45	6110.55	7060	7005	-5.93556	7217	7326	9.12491
6112.45	6110.55	6695	6669	-4.31385	6598	6754	24.5408		6112.45	6110.55	6695	6669	-4.31385	6673	6807	19.5144
6112.45	6110.55	6426	6387	-13.4166	7164	7331	13.8399		6112.45	6110.55	6426	6387	-13.4166	7217	7338	10.0133
6112.45	6110.55	6767	6789	3.52405	6645	6752	16.9785		6112.45	6110.55	6767	6789	3.52405	7611	7823	12.4914
6112.45	6110.55	6742	6607	-26.8083	7100	7183	7.91727		6112.45	6110.55	6742	6607	-26.8083	6920	6954	4.25738
6112.45	6110.55	7046	6915	-16.047	7240	7279	3.50113		6112.45	6110.55	7046	6915	-16.047	7462	7401	-4.57908
6112.45	6110.55	7164	7331	13.8399	7470	7384	-6.60337		6112.45	6110.55	7164	7331	13.8399	6744	6847	14.2452
6112.45	6110.55	6645	6552	-20.6343	8200	8542	14.1442		6112.45	6110.55	6645	6552	-20.6343	6664	6703	6.90502
6112.45	6110.55	7100	7183	7.91727	7456	7472	1.31544		6112.45	6110.55	7100	7183	7.91727	7182	7232	4.62873
6112.45	6110.55	6887	6827	-8.10811	8126	8083	-2.08324		6112.45	6110.55	6887	6827	-8.10811	6859	6808	-7.03858
6112.45	6110.55	6651	6609	-8.04304	7424	7654	15.0253		6112.45	6110.55	6651	6609	-8.04304	7271	7304	2.92505
6112.45	6110.55	6422	6429	2.7976	8073	8081	0.502884		6112.45	6110.55	6422	6429	2.7976	7396	7534	9.82884
6112.45	6110.55	6188	6184	-2.84653	7082	7159	7.52623		6112.45	6110.55	6188	6184	-2.84653	6495	6710	36.1844
6112.45	6110.55	6430	6408	-6.75428	6934	6928	-0.500445		6112.45	6110.55	6430	6408	-6.75428	7232	7460	17.0372
6112.45	6110.55	6413	6398	-4.55408	7693	7999	16.3048		6112.45	6110.55	6413	6398	-4.55408	6994	6939	-6.40843
6112.45	6110.55	6729	6686	-7.1406	7857	7769	-5.19103		6112.45	6110.55	6729	6686	-7.1406	6927	6956	3.65591
6112.45	6110.55	6589	6498	-22.9939	6659	6697	6.80515		6112.45	6110.55	6589	6498	-22.9939	6839	6888	6.54818
6112.45	6110.55	6217	6201	-15.5779	6603	6620	3.71163		6112.45	6110.55	6217	6201	-15.5779	6931	7131	19.7862
6112.45	6110.55	6424	6388	-12.287	6310	6403	32.4526		6112.45	6110.55	6424	6388	-12.287	6880	6946	8.1284
6112.45	6110.55	7566	7574	0.677103	7143	7011	-14.4472		6112.45	6110.55	7566	7574	0.677103	6523	6500	-5.4155
6112.45	6110.55	6764	6850	11.8884	7059	7238	16.0458		6112.45	6110.55	6764	6850	11.8884
6112.45	6110.55	6995	6867	-16.6687	6962	6947	-1.56505		6112.45	6110.55	6995	6867	-16.6687
6112.45	6110.55	6861	6906	5.89714	6571	6582	2.73814		6112.45	6110.55	6861	6906	5.89714
6112.45	6110.55	6302	6300	-0.0479846	6737	6997	29.5457		6112.45	6110.55	6302	6300	-0.0479846
6112.45	6110.55	6335	6348	6.27871	6358	6352	-1.69428		6112.45	6110.55	6335	6348	6.27871
6112.45	6110.55	8106	7815	-16.9609	6307	6366	23.8434		6112.45	6110.55	8106	7815	-16.9609
6112.45	6110.55	6516	6471	-11.9546	6249	6258	7.39827		6112.45	6110.55	6516	6471	-11.9546
6112.45	6110.55	7372	7245	-11.0265	6482	6487	1.83531		6112.45	6110.55	7372	7245	-11.0265
6112.45	6110.55	7217	7210	-0.46304	6525	6548	5.6941		6112.45	6110.55	7217	7210	-0.46304
6112.45	6110.55	6933	6831	-13.8927	6427	6496	18.3962		6112.45	6110.55	6933	6831	-13.8927
6112.45	6110.55	7014	7004	-0.905576	6185	6202	20.6759		6112.45	6110.55	7014	7004	-0.905576
6112.45	6110.55	6883	6935	6.53876	6514	6455	-16.5743		6112.45	6110.55	6883	6935	6.53876
6112.45	6110.55	7203	7283	6.98612	7595	7713	7.48284		6112.45	6110.55	7203	7283	6.98612
6112.45	6110.55	6764	6750	-1.89082	6888	6920	4.18913		6112.45	6110.55	6764	6750	-1.89082
6112.45	6110.55	6995	6867	-16.6687	6283	6304	11.8421		6112.45	6110.55	6995	6867	-16.6687
6112.45	6110.55				6479	6562	18.8079
6112.45	6110.55				6618	6654	6.97558
6112.45	6110.55				6525	6469	-15.09
6112.45	6110.55				6633	6670	6.95483
6112.45	6110.55				6868	6962	11.2641
6112.45	6110.55				6912	6814	-13.6599
