# Supplementary material for: A FRET-based study reveals site-specific regulation of spindle position checkpoint proteins at yeast centrosomes
Source: eLife. 2016 May 9;5:e14029. doi: 10.7554/eLife.14029 (PMC4878874; doi:10.7554/eLife.14029)
Supplement: Figure 4—source data 2. — DOI: http://dx.doi.org/10.7554/eLife.14029.030 [file elife-14029-fig4-data2.xls]

## Sheet: Description
Description:
List of Abbreviations
Raw Mean Fluoresence Intensity before bleach (Donor/Aceptor): FL (DA) bb
Raw Mean Fluoresence Intensity before bleach (Donor only): FL (D) bb
Raw Mean Fluoresence Intensity before bleach (Background): FL (bg) bb
Raw Mean Fluoresence Intensity after bleach (Donor/Aceptor): FL (DA) ab
Raw Mean Fluoresence Intensity after bleach (Donor only): FL (D) ab
RawMean Fluoresence Intensity after bleach (Background): FL (bg) ab
Calculated FRET efficiency % for the indicated Donor/Acceptor pai) : FRET % (DA)
Calculated FRET efficiency % background for Donor only sample : FRET % (D)

## Sheet: Experiment1 
pair: Nud1-mTUR Bfa1-EYFP									pair: Nud1-mTUR Bfa1-EYFP
condition: spc72∆ aligned spindle									condition: spc72∆ misaligned spindle
P=0,006									P=0,0001
FL(bg)bb	FL(bg)ab	FL(D)bb	FL(D)ab	FRET (D) %	FL(DA)bb	FL(DA)ab	FRET(DA) %		FL(bg)bb	FL(bg)ab	FL(D)bb	FL(D)ab	FRET (D) %	FL(DA)bb	FL(DA)ab	FRET(DA) %
3.83203e+06	3.78578e+06	3.83314e+06	3.78702e+06	14.5199	3.78637e+06	3.78649e+06	21.058		3.83203e+06	3.78578e+06	3.83314e+06	3.78702e+06	14.5199	3.78578e+06	3.78578e+06	17.439
3.83203e+06	3.78578e+06	3.8338e+06	3.78746e+06	-0.4799	3.7872e+06	3.7872e+06	4.55351		3.83203e+06	3.78578e+06	3.8338e+06	3.78746e+06	-0.4799	3.7873e+06	3.78738e+06	10.1085
3.83203e+06	3.78578e+06	3.83261e+06	3.78647e+06	18.887	3.7867e+06	3.78659e+06	-9.692		3.83203e+06	3.78578e+06	3.83261e+06	3.78647e+06	18.887	3.78841e+06	3.78832e+06	1.4402
3.83203e+06	3.78578e+06	3.83274e+06	3.78649e+06	4.33099	3.78611e+06	3.78614e+06	11.9607		3.83203e+06	3.78578e+06	3.83274e+06	3.78649e+06	4.33099	3.78663e+06	3.7867e+06	11.6239
3.83203e+06	3.78578e+06	3.8341e+06	3.78753e+06	-13.595	3.78605e+06	3.78604e+06	0.5898		3.83203e+06	3.78578e+06	3.8341e+06	3.78753e+06	-13.595	3.78644e+06	3.78646e+06	6.6017
3.83203e+06	3.78578e+06	3.83383e+06	3.7876e+06	5.35489	3.78662e+06	3.78665e+06	8.0817		3.83203e+06	3.78578e+06	3.83383e+06	3.7876e+06	5.35489	3.78612e+06	3.78616e+06	15.81
3.83203e+06	3.78578e+06	3.83355e+06	3.7875e+06	16.107	3.78618e+06	3.78623e+06	16.476		3.83203e+06	3.78578e+06	3.83355e+06	3.7875e+06	16.107	3.78651e+06	3.78653e+06	7.56
3.83203e+06	3.78578e+06	3.83357e+06	3.78726e+06	-0.0031	3.78626e+06	3.78632e+06	16.75		3.83203e+06	3.78578e+06	3.83357e+06	3.78726e+06	-0.0031	3.78661e+06	3.78663e+06	7.0744
3.83203e+06	3.78578e+06	3.83332e+06	3.78696e+06	-4.19	3.78661e+06	3.78669e+06	13.3855		3.83203e+06	3.78578e+06	3.83332e+06	3.78696e+06	-4.19	3.78733e+06	3.7873e+06	2.6072
3.83203e+06	3.78578e+06	3.83295e+06	3.78667e+06	1.81	3.78676e+06	3.7868e+06	8.3556		3.83203e+06	3.78578e+06	3.83295e+06	3.78667e+06	1.81	3.78855e+06	3.7886e+06	6.8378
3.83203e+06	3.78578e+06	3.83282e+06	3.78666e+06	15.81	3.78661e+06	3.78663e+06	6.936		3.83203e+06	3.78578e+06	3.83282e+06	3.78666e+06	15.81	3.78758e+06	3.78762e+06	6.81
3.83203e+06	3.78578e+06	3.83363e+06	3.78725e+06	-4.19	3.78703e+06	3.78708e+06	9.0344		3.83203e+06	3.78578e+06	3.83363e+06	3.78725e+06	-4.19	3.78711e+06	3.78724e+06	13.81
3.83203e+06	3.78578e+06	3.83276e+06	3.78651e+06	4.81	3.78653e+06	3.78653e+06	4.9147		3.83203e+06	3.78578e+06	3.83276e+06	3.78651e+06	4.81	3.78627e+06	3.78627e+06	5.81
3.83203e+06	3.78578e+06	3.83324e+06	3.78694e+06	-0.19	3.78606e+06	3.78603e+06	-8.461		3.83203e+06	3.78578e+06	3.83324e+06	3.78694e+06	-0.19	3.7866e+06	3.78666e+06	10.81
3.83203e+06	3.78578e+06	3.83375e+06	3.78736e+06	-4.19	3.78644e+06	3.78642e+06	2.1629		3.83203e+06	3.78578e+06	3.83375e+06	3.78736e+06	-4.19	3.78643e+06	3.78646e+06	8.81
3.83203e+06	3.78578e+06	3.83231e+06	3.78609e+06	11.81	3.78692e+06	3.78702e+06	13.2659		3.83203e+06	3.78578e+06	3.83231e+06	3.78609e+06	11.81	3.78619e+06	3.78622e+06	12.81
3.83203e+06	3.78578e+06	3.83273e+06	3.78644e+06	-2.19	3.78642e+06	3.78641e+06	2.979		3.83203e+06	3.78578e+06	3.83273e+06	3.78644e+06	-2.19	3.78639e+06	3.7864e+06	4.81
3.83203e+06	3.78578e+06	3.83308e+06	3.78678e+06	-0.19	3.78651e+06	3.78661e+06	16.39		3.83203e+06	3.78578e+06	3.83308e+06	3.78678e+06	-0.19	3.78681e+06	3.78696e+06	17.439
3.83203e+06	3.78578e+06	3.83242e+06	3.7862e+06	12.81	3.78691e+06	3.78696e+06	8.5251		3.83203e+06	3.78578e+06	3.83242e+06	3.7862e+06	12.81	3.78663e+06	3.78669e+06	10.9266
3.83203e+06	3.78578e+06	3.83295e+06	3.78673e+06	7.4928	3.7869e+06	3.78684e+06	-0.3562		3.83203e+06	3.78578e+06	3.83295e+06	3.78673e+06	7.4928	3.78648e+06	3.78648e+06	5.40178
3.83203e+06	3.78578e+06	3.83282e+06	3.7865e+06	-6.207	3.78718e+06	3.78739e+06	17.876		3.83203e+06	3.78578e+06	3.83282e+06	3.7865e+06	-6.207	3.7864e+06	3.78641e+06	6.0199
3.83203e+06	3.78578e+06	3.83248e+06	3.78623e+06	3.4957	3.78678e+06	3.78691e+06	16.415		3.83203e+06	3.78578e+06	3.83248e+06	3.78623e+06	3.4957	3.78824e+06	3.7881e+06	-1.1881
3.83203e+06	3.78578e+06	3.83239e+06	3.78609e+06	-10.778	3.78605e+06	3.78608e+06	13.1576		3.83203e+06	3.78578e+06	3.83239e+06	3.78609e+06	-10.778	3.78612e+06	3.78614e+06	9.8035
3.83203e+06	3.78578e+06	3.83407e+06	3.78769e+06	-1.9151	3.78622e+06	3.78618e+06	-4.5712		3.83203e+06	3.78578e+06	3.83407e+06	3.78769e+06	-1.9151	3.78647e+06	3.78653e+06	12.8456
3.83203e+06	3.78578e+06	3.83309e+06	3.78678e+06	-1.3292	3.78589e+06	3.78587e+06	-8.424		3.83203e+06	3.78578e+06	3.83309e+06	3.78678e+06	-1.3292	3.78758e+06	3.78762e+06	6.9293
3.83203e+06	3.78578e+06	3.83293e+06	3.78675e+06	11.1137	3.78687e+06	3.78673e+06	-10.267		3.83203e+06	3.78578e+06	3.83293e+06	3.78675e+06	11.1137	3.78635e+06	3.78642e+06	15.369
3.83203e+06	3.78578e+06	3.83255e+06	3.78624e+06	-8.97	3.78699e+06	3.78698e+06	4.22195		3.83203e+06	3.78578e+06	3.83255e+06	3.78624e+06	-8.97	3.78674e+06	3.78676e+06	6.0061
3.83203e+06	3.78578e+06	3.83305e+06	3.78681e+06	5.10481	3.78648e+06	3.78647e+06	3.98218		3.83203e+06	3.78578e+06	3.83305e+06	3.78681e+06	5.10481	3.7879e+06	3.78809e+06	12.9093
3.83203e+06	3.78578e+06	3.83203e+06	3.78578e+06	7.4928	3.78654e+06	3.78654e+06	4.51693		3.83203e+06	3.78578e+06	3.83203e+06	3.78578e+06	7.4928
3.83203e+06	3.78578e+06	3.83203e+06	3.78578e+06	-6.207	3.78729e+06	3.78745e+06	14.3086		3.83203e+06	3.78578e+06	3.83203e+06	3.78578e+06	-6.207
3.83203e+06	3.78578e+06	3.83203e+06	3.78578e+06	3.4957	3.78619e+06	3.7862e+06	7.6762		3.83203e+06	3.78578e+06	3.83203e+06	3.78578e+06	3.4957
3.83203e+06	3.78578e+06	3.83203e+06	3.78578e+06	-10.778	3.78596e+06	3.78598e+06	13.5292		3.83203e+06	3.78578e+06	3.83203e+06	3.78578e+06	-10.778
3.83203e+06	3.78578e+06	3.83203e+06	3.78578e+06	-1.9151	3.78636e+06	3.78638e+06	7.5309		3.83203e+06	3.78578e+06	3.83203e+06	3.78578e+06	-1.9151
3.83203e+06	3.78578e+06	3.83203e+06	3.78578e+06	-1.3292	3.78641e+06	3.78648e+06	15.851		3.83203e+06	3.78578e+06	3.83203e+06	3.78578e+06	-1.3292
3.83203e+06	3.78578e+06	3.83203e+06	3.78578e+06	11.1137	3.7863e+06	3.78633e+06	10.4204		3.83203e+06	3.78578e+06	3.83203e+06	3.78578e+06	11.1137
3.83203e+06	3.78578e+06	3.83203e+06	3.78578e+06	-8.97	3.78604e+06	3.78608e+06	18.503		3.83203e+06	3.78578e+06	3.83203e+06	3.78578e+06	-8.97
3.83203e+06	3.78578e+06	3.83203e+06	3.78578e+06	5.10481	3.78672e+06	3.78672e+06	4.49575		3.83203e+06	3.78578e+06	3.83203e+06	3.78578e+06	5.10481
					3.7879e+06	3.7878e+06	-0.2474
					3.78731e+06	3.78741e+06	11.226
					3.78675e+06	3.78675e+06	4.74164
					3.78629e+06	3.78622e+06	-11.051
					3.78689e+06	3.78695e+06	10.4767
					3.78599e+06	3.78599e+06	2.5631
					3.78638e+06	3.78644e+06	13.4997
					3.78641e+06	3.78648e+06	14.4916
					3.78662e+06	3.78653e+06	-6.93
					3.7871e+06	3.78718e+06	10.2681
					3.78681e+06	3.78694e+06	16.062

## Sheet: quantif. #2
pair: Nud1-mTUR Bfa1-EYFP									pair: Nud1-mTUR Bfa1-EYFP
condition: spc72∆ aligned spindle									condition: spc72∆ misaligned spindle
P=0,032*10¯⁴									P=0,022*10¯⁵
FL(bg)bb	FL(bg)ab	FL(D)bb	FL(D)ab	FRET (D) %	FL(DA)bb	FL(DA)ab	FRET(DA) %		FL(bg)bb	FL(bg)ab	FL(D)bb	FL(D)ab	FRET (D) %	FL(DA)bb	FL(DA)ab	FRET(DA) %
3895	3810.33	4187	4098	-1.50637	4218	4306	34.8352		3895	3810.33	4187	4098	-1.50637	4746	4723	6.75676
3895	3810.33	4273	4178	-2.81052	4018	3989	31.1567		3895	3810.33	4273	4178	-2.81052	5872	5847	2.92962
3895	3810.33	4284	4154	-13.1911	4868	4853	6.68159		3895	3810.33	4284	4154	-13.1911	4726	4715	8.14296
3895	3810.33	4140	4006	-25.2129	4603	4425	-15.1844		3895	3810.33	4140	4006	-25.2129	4702	4800	18.4574
3895	3810.33	4390	4249	-12.8419	4313	4422	31.6621		3895	3810.33	4390	4249	-12.8419	4096	3994	-9.43739
3895	3810.33	4280	4202	1.70213	5330	5376	8.34575		3895	3810.33	4280	4202	1.70213	4955	5165	21.752
3895	3810.33	4121	4053	6.86813	5594	5489	-1.21128		3895	3810.33	4121	4053	6.86813	5519	5487	3.14115
3895	3810.33	4237	4096	-19.72	5434	5459	6.65184		3895	3810.33	4237	4096	-19.72	4275	4342	28.5266
3895	3810.33	4060	3970	-3.34029	4679	4644	5.95762		3895	3810.33	4060	3970	-3.34029	4296	4344	24.8595
3895	3810.33	4122	4007	-15.4237	4933	4834	-1.4002		3895	3810.33	4122	4007	-15.4237	4850	4784	1.91715
3895	3810.33	4032	3958	7.22348	5031	4961	1.27462		3895	3810.33	4032	3958	7.22348	4489	4433	4.60385
3895	3810.33	4431	4369	4.05728	4582	4463	-5.26047		3895	3810.33	4431	4369	4.05728	4943	4895	3.38045
3895	3810.33	4516	4424	-1.195	4476	4497	15.3883		3895	3810.33	4516	4424	-1.195	4610	4539	1.87557
3895	3810.33	4221	4196	15.471	4652	4559	-1.11309		3895	3810.33	4221	4196	15.471	4684	4698	11.1153
3895	3810.33	4207	4103	-6.60592	5021	5073	10.8237		3895	3810.33	4207	4103	-6.60592	4380	4388	16.0415
3895	3810.33	4114	3995	-18.5921	4939	4854	-0.0319387		3895	3810.33	4114	3995	-18.5921	3945	3875	22.6804
3895	3810.33	4861	4720	-6.19274	4934	4949	8.75293		3895	3810.33	4861	4720	-6.19274	4144	4158	28.3797
3895	3810.33	4034	3954	3.24826	4374	4374	15.0207		3895	3810.33	4034	3954	3.24826	4781	4746	5.30816
3895	3810.33	4827	4709	-3.7092	4262	4175	-0.639854		3895	3810.33	4827	4709	-3.7092	4750	4702	4.11215
3895	3810.33	4427	4352	1.78462	4890	4875	6.54352		3895	3810.33	4427	4352	1.78462	4412	4332	0.894569
3895	3810.33	4899	4737	-8.34532	6554	6566	3.50792		3895	3810.33	4899	4737	-8.34532	4364	4397	20.0568
3895	3810.33	4734	4654	0.553141	4138	4106	17.8129		3895	3810.33	4734	4654	0.553141	4057	3988	8.81801
3895	3810.33	4061	3972	-2.68041	6171	6120	1.45764		3895	3810.33	4061	3972	-2.68041	4220	4241	24.5356
3895	3810.33	4081	3977	-11.6	5163	4964	-9.91043		3895	3810.33	4081	3977	-11.6
3895	3810.33	4267	4142	-12.1608	4486	4561	21.27		3895	3810.33	4267	4142	-12.1608
3895	3810.33	4503	4405	-2.24215	5155	5194	8.93761		3895	3810.33	4503	4405	-2.24215
3895	3810.33	4042	3934	-18.8679	4160	4125	15.7839		3895	3810.33	4042	3934	-18.8679
3895	3810.33	4492	4412	0.775623	4387	4295	-1.51307		3895	3810.33	4492	4412	0.775623
3895	3810.33	4238	4084	-25.335	4720	4701	7.37275		3895	3810.33	4238	4084	-25.335
3895	3810.33				4515	4483	7.82953
3895	3810.33				4844	4890	12.1025
3895	3810.33				4934	4819	-3.00727
3895	3810.33				5215	5202	5.1497
3895	3810.33				4816	4862	12.4247
3895	3810.33				4481	4518	17.1927
3895	3810.33				4470	4413	4.59071
3895	3810.33				4128	4036	-3.24963
3895	3810.33				4264	4142	-11.2563
3895	3810.33				4056	4031	27.0393
3895	3810.33				4862	4845	6.53995
3895	3810.33				4953	4910	3.78903

## Sheet: quantif. #3
pair: Nud1-mTUR Bfa1-EYFP									pair: Nud1-mTUR Bfa1-EYFP
condition: spc72∆ aligned spindle									condition: spc72∆ misaligned spindle
P=0,019*10¯¹⁰									P=0,011*10¯¹²
FL(bg)bb	FL(bg)ab	FL(D)bb	FL(D)ab	FRET (D) %	FL(DA)bb	FL(DA)ab	FRET(DA) %		FL(bg)bb	FL(bg)ab	FL(D)bb	FL(D)ab	FRET (D) %	FL(DA)bb	FL(DA)ab	FRET(DA) %
4180.56	3887.56	5040	4796	5.39384	4961	4950	26.5426		4180.56	3887.56	5040	4796	5.39384	6749.44	5875	13.9878
4180.56	3887.56	4860	4560	-1.04098	4702	4536	19.5853		4180.56	3887.56	4860	4560	-1.04098	7495.44	6818	10.0667
4180.56	3887.56	4794	4517	2.54192	4758	4526	9.55447		4180.56	3887.56	4794	4517	2.54192	6336.44	5632	11.5796
4180.56	3887.56	4968	4736	7.18963	5077	5040	22.2137		4180.56	3887.56	4968	4736	7.18963	6510.44	5641	12.0335
4180.56	3887.56	4561	4284	4.03587	4604	4326	3.42119		4180.56	3887.56	4561	4284	4.03587	6225.44	5813	13.5553
4180.56	3887.56	4972	4593	-12.1909	4679	4487	16.8489		4180.56	3887.56	4972	4593	-12.1909	6583.44	5734	12.7272
4180.56	3887.56	4290	3990	-6.83297	5094	4931	12.4587		4180.56	3887.56	4290	3990	-6.83297	5013.44	4779	18.8458
4180.56	3887.56	4198	3902	-20.7692	5299	5031	2.18638		4180.56	3887.56	4198	3902	-20.7692	4943.44	4908	26.949
4180.56	3887.56	4783	4490	0	6212	6082	7.42785		4180.56	3887.56	4783	4490	0	5280.44	4647	34.4989
4180.56	3887.56	4506	4201	-3.82843	5113	4806	-1.52432		4180.56	3887.56	4506	4201	-3.82843	5277.44	4958	27.9323
4180.56	3887.56	4813	4500	-3.2656	5245	5232	20.8264		4180.56	3887.56	4813	4500	-3.2656	5348.44	4713	35.1326
4180.56	3887.56	4661	4307	-14.543	5278	5237	18.6744		4180.56	3887.56	4661	4307	-14.543	5801.44	5292	18.7975
4180.56	3887.56	4886	4596	0.423463	4504	4491	46.4003		4180.56	3887.56	4886	4596	0.423463	5167.44	4222	15.8472
4180.56	3887.56	4743	4414	-6.83833	4777	4697	26.3143		4180.56	3887.56	4743	4414	-6.83833	5254.44	4495	15.8039
4180.56	3887.56	4493	4197	-0.969479	4698	4509	16.7352		4180.56	3887.56	4493	4197	-0.969479	5320.44	4885	17.0436
4180.56	3887.56	4887	4620	3.54976	5178	5131	19.7838		4180.56	3887.56	4887	4620	3.54976	5422.44	4545	18.5567
4180.56	3887.56	4792	4331	-37.8852	4760	4655	24.4969		4180.56	3887.56	4792	4331	-37.8852	5052.44	4268	31.5421
4180.56	3887.56	5099	4740	-7.74244	4903	4794	20.2991		4180.56	3887.56	5099	4740	-7.74244	5962.44	5000	22.3831
4180.56	3887.56	4841	4503	-7.31179	5060	4970	18.7538		4180.56	3887.56	4841	4503	-7.31179	5669.44	5030	27.4849
4180.56	3887.56	5167	4823	-5.45195	4569	4354	16.7222		4180.56	3887.56	5167	4823	-5.45195	5546.44	4400	25.954
4180.56	3887.56	4572	4234	-12.9891	4569	4349	15.8199		4180.56	3887.56	4572	4234	-12.9891	5673.44	5106	9.60241
4180.56	3887.56	5002	4686	-2.8806	5122	4971	13.1063		4180.56	3887.56	5002	4686	-2.8806	6006.44	4910	1.76049
4180.56	3887.56	4838	4518	-4.28269	4366	4074	0.536353		4180.56	3887.56	4838	4518	-4.28269	6317.44	5613	14.2572
4180.56	3887.56	5149	4825	-3.30686	4690	4506	17.6249		4180.56	3887.56	5149	4825	-3.30686	6142.44	5173	22.7159
4180.56	3887.56	4914	4672	6.50142	4584	4341	11.0267		4180.56	3887.56	4914	4672	6.50142	6044.44	5271	18.2877
4180.56	3887.56	4952	4652	-0.915698	4660	4431	11.7767		4180.56	3887.56	4952	4652	-0.915698	5487.44	4608	25.6786
4180.56	3887.56	4853	4668	13.8383	4877	4732	17.5263		4180.56	3887.56	4853	4668	13.8383	5766.44	5002	18.0359
4180.56	3887.56	4771	4384	-18.9346	4999	4908	19.7953		4180.56	3887.56	4771	4384	-18.9346	5100.44	4290	18.1391
4180.56	3887.56	4556	4234	-8.37075	4794	4725	26.748		4180.56	3887.56	4556	4234	-8.37075
4180.56	3887.56	4445	4155	1.12173	4322	4033	2.75019		4180.56	3887.56	4445	4155	1.12173
4180.56	3887.56	4867	4542	-4.88964	4648	4424	12.8625		4180.56	3887.56	4867	4542	-4.88964
4180.56	3887.56	4501	4208	0	4491	4178	-6.886		4180.56	3887.56	4501	4208	0
4180.56	3887.56				4527	4306	17.2066
4180.56	3887.56				4675	4421	7.31098
4180.56	3887.56				4751	4705	30.2161
4180.56	3887.56				4863	4799	25.125
4180.56	3887.56				5120	4988	14.6305
4180.56	3887.56				4845	4786	26.045
4180.56	3887.56				4476	4215	9.77265
4180.56	3887.56				4484	4199	2.56868
