# Supplementary material for: A FRET-based study reveals site-specific regulation of spindle position checkpoint proteins at yeast centrosomes
Source: eLife. 2016 May 9;5:e14029. doi: 10.7554/eLife.14029 (PMC4878874; doi:10.7554/eLife.14029)
Supplement: Figure 4—source data 3. — FRAP curves for individual cells are also presented (source data for Figure 4E). DOI: http://dx.doi.org/10.7554/eLife.14029.031 [file elife-14029-fig4-data3.xls]

## Sheet: Description
Description
FRAP of Bfa1-GFP at the SPBs
FRAP data is corrected for acquisition bleaching and normalized to 0-1 (first point after bleach- before cleach)
Individual and average FRAP curves are shown in sheets "Figure 4E data & Figure 4F data"
raw data and correctes&normalized data series for individual cells are shown in sheets "Figure 4E raw data & Figure 4F raw data"
graphss of individual and average FRAP curves are shown for each experiment
Experiment1 correspons to the data shown in the figures
Data of the experiment repititions are shown as Experiment 2 in each sheet
Note that 2 biological replicates are performed for all data set except for the kar9∆ and kar9∆ kin4∆ cells with misaligned spindle. For e kar9∆ and kar9∆ kin4∆ cells with misaligned spindles, only one experiment is done as t-half of their FRAP recovery curves are a within the expected range (Caydasi et.al 2009)
FRAP cell #:	Corrected and normalized FRAP curves for the indicated individual cell (ie cell1, cell2...)
FRAP average:	Average of the indicated individual FRAP curves
stdev	Standard deviation of the avarage FRAP curve
Frap ROI mean	Mean Fluorescence intensity of the SPB bleached (0.809 µm2 area size is used for all measurements)
background mean	Mean Fluorescence intensity background area (Area free of cells)
ref mean	Mean Fluorescence intensityof the reference area (Area with unbleached cells)
normalized 0-1	Corrected and normalized FRAP data
time	in seconds
FI	Fluorencence intensity
AU	arbitrary units

## Sheet: Figure 4E data
FRAP of Bfa1-GFP at the dSPB of W303 kar9∆ cells with normal aligned spindles (Experiment 1)																								FRAP of Bfa1-GFP at the dSPB of W303 spc72∆ cells with normal aligned spindles (Experiment 1)																								FRAP of Bfa1-GFP at the dSPB of W303 kar9∆ cells with normal aligned spindles (Experiment 2)
time	FRAP cell1	time	FRAP cell2	time	FRAP cell3	time	FRAP cell4	time	FRAP cell5	time	FRAP cell6		time	FRAP average	stdev									time	FRAP cell1	time	FRAP cell2	time	FRAP cell3	time	FRAP cell4	time	FRAP cell5		time	FRAP average	stdev											time	cell 1
0	0.942257	0	1.02834	0	0.875949	0	0.935217	0	0.984915	0	0.89517		0	0.943641	0.0563595									0	0.954109	0	0.984726	0	0.972649	0	1.05213	0	0.917004		0	0.976123	0.0496055											0	0.952963
2	1.01176	2	0.95842	2	1.04256	2	1.01407	2	1.01384	2	1.02892		2	1.0116	0.0286285									2	1.01301	2	1.01819	2	1.01223	2	0.990265	2	1.0251		2	1.01176	0.0130681											2	1.01368
4	1.04598	4	1.01324	4	1.08149	4	1.05071	4	1.00124	4	1.07591		4	1.04476	0.0323839									4	1.03288	4	0.997087	4	1.01512	4	0.957605	4	1.0579		4	1.01212	0.0378596											4	1.03336
6	0	6	0	6	0	6	0	6	0	6	0		6	0	0									6	0	6	0	6	0	6	0	6	0		6	0	0											6	0
8	0.0306463	8	0.0524958	8	0.048912	8	-0.00392072	8	0.0152227	8	0.0115697		8	0.025821	0.0222172									8	0.00583817	8	0.0102086	8	0.00838777	8	0.0188573	8	0.00779143		8	0.0102167	0.00507589											8	0.0150733
10	0.0278973	10	0.029692	10	0.0531934	10	0.030158	10	0.0248828	10	0.0203961		10	0.0310366	0.0114407									10	0.0125231	10	0.0145819	10	0.0208667	10	0.0282706	10	0.00312264		10	0.015873	0.00940876											10	0.0283325
12	0.0678698	12	0.0144035	12	0.0599621	12	0.091965	12	0.0242556	12	0.0163109		12	0.0457945	0.0320573									12	0.00778124	12	0.0172741	12	0.0423146	12	0.0360505	12	0.0165391		12	0.0239919	0.0145309											12	0.0312576
14	0.0365258	14	0.00689248	14	0.0679707	14	0.0857175	14	0.0294413	14	0.0403407		14	0.0444814	0.0281841									14	0.0129522	14	0.0166197	14	0.0326381	14	0.0386934	14	0.0165392		14	0.0234885	0.011417											14	0.0405827
16	0.0686971	16	0.0343636	16	0.0597783	16	0.0444759	16	0.0324063	16	0.0119979		16	0.0419532	0.0204226									16	0.0186087	16	0.0330273	16	0.030328	16	0.0502061	16	0.0180037		16	0.0300348	0.0131456											16	0.0502315
18	0.04443	18	0.0276519	18	0.0830383	18	0.0863217	18	0.0292476	18	0.0376088		18	0.0513831	0.0265103									18	0.0260939	18	0.0323268	18	0.0367516	18	0.0519233	18	0.0253842		18	0.034496	0.0108065											18	0.030857
20	0.0575096	20	0.0525041	20	0.105405	20	0.125899	20	0.0522029	20	0.0381683		20	0.0719481	0.0350643									20	0.0376249	20	0.0319939	20	0.034877	20	0.0591246	20	0.0268152		20	0.0380871	0.0124225											20	0.0456444
22	0.0522062	22	0.0576516	22	0.106073	22	0.10221	22	0.0327664	22	0.0339773		22	0.0641474	0.0325156									22	0.0395254	22	0.0336562	22	0.0419764	22	0.0730732	22	0.0293997		22	0.0435262	0.0172366											22	0.0570151
24	0.0823323	24	0.0343826	24	0.0578455	24	0.148179	24	0.0268216	24	0.0411782		24	0.0651232	0.0452388									24	0.0408897	24	0.043287	24	0.0397377	24	0.0781724	24	0.0370861		24	0.0478346	0.0171055											24	0.0548464
26	0.0874551	26	0.0368771	26	0.0657302	26	0.113895	26	0.0187351	26	0.071447		26	0.06569	0.0342508									26	0.0467174	26	0.0441474	26	0.0518382	26	0.0745358	26	0.0322442		26	0.0498966	0.0155372											26	0.0643335
28	0.0895205	28	0.0446244	28	0.0555792	28	0.120538	28	0.0342737	28	0.0781804		28	0.0704528	0.0320285									28	0.0352505	28	0.0571416	28	0.0585044	28	0.0838491	28	0.0400875		28	0.0549666	0.0191151											28	0.0684131
30	0.0924693	30	0.0691002	30	0.0711811	30	0.105984	30	0.0102036	30	0.0828088		30	0.0719578	0.0332223									30	0.0461268	30	0.0534643	30	0.0609412	30	0.0748681	30	0.0464143		30	0.056363	0.0119954											30	0.0842661
32	0.087651	32	0.226419	32	0.052577	32	0.0974718	32	0.0182726	32	0.0732506		32	0.0926071	0.0713536									32	0.0603843	32	0.0539492	32	0.0734572	32	0.0821851	32	0.0488506		32	0.0637653	0.0138154											32	0.0906518
34	0.107117	34	0.242615	34	0.0496442	34	0.138581	34	0.00446087	34	0.097913		34	0.106722	0.0815781									34	0.0457457	34	0.0645037	34	0.0659632	34	0.0846514	34	0.0495487		34	0.0620825	0.0154456											34	0.0891107
36	0.11568	36	0.230175	36	0.0663256	36	0.16117	36	0.0219179	36	0.0844766		36	0.113291	0.0739528									36	0.0460912	36	0.0503202	36	0.0694069	36	0.0820873	36	0.0496244		36	0.059506	0.0155718											36	0.0949411
38	0.0904724	38	0.200657	38	0.0299837	38	0.108312	38	0.0319247	38	0.085145		38	0.0910825	0.0625647									38	0.0475325	38	0.060767	38	0.0722503	38	0.0886556	38	0.0543516		38	0.0647114	0.0161876											38	0.108493
40	0.1076	40	0.179054	40	0.0872269	40	0.161499	40	0.0264357	40	0.113561		40	0.112563	0.0545917									40	0.0551672	40	0.0484438	40	0.0668941	40	0.0787842	40	0.0571969		40	0.0612972	0.0117975											40	0.111819
42	0.113667	42	0.229435	42	0.0486945	42	0.187569	42	0.0168781	42	0.120073		42	0.119386	0.0803716									42	0.0545504	42	0.0595928	42	0.0774015	42	0.0799376	42	0.0638585		42	0.0670681	0.0111274											42	0.125039
44	0.122105	44	0.262096	44	0.0594395	44	0.201289	44	0.0213608	44	0.112662		44	0.129825	0.089079									44	0.0652006	44	0.0654595	44	0.0777091	44	0.0843504	44	0.0647626		44	0.0714964	0.00901732											44	0.162603
46	0.104292	46	0.2368	46	0.0477911	46	0.152182	46	0.0482211	46	0.126883		46	0.119361	0.0711841									46	0.0519455	46	0.0736844	46	0.0718046	46	0.0883473	46	0.0624781		46	0.069652	0.0135591											46	0.127876
48	0.149112	48	0.253018	48	0.127535	48	0.195754	48	0.0430183	48	0.084901		48	0.142223	0.0755401									48	0.0604458	48	0.0865936	48	0.080872	48	0.0812743	48	0.0664682		48	0.0751308	0.0110994											48	0.137621
50	0.133671	50	0.2301	50	0.13973	50	0.235464	50	0.028695	50	0.104872		50	0.145422	0.0783812									50	0.0679839	50	0.0578612	50	0.0760972	50	0.0833007	50	0.0678297		50	0.0706146	0.00959584											50	0.190129
52	0.134968	52	0.259512	52	0.126405	52	0.271194	52	0.0601771	52	0.117746		52	0.161667	0.0845639									52	0.0789591	52	0.0829802	52	0.0670063	52	0.094339	52	0.069395		52	0.0785359	0.0110245											52	0.16796
54	0.117816	54	0.276735	54	0.138612	54	0.232588	54	0.0669002	54	0.103858		54	0.156085	0.0810686									54	0.0657893	54	0.100996	54	0.0821156	54	0.0906914	54	0.0761262		54	0.0831436	0.0134828											54	0.18185
56	0.129994	56	0.243556	56	0.110246	56	0.286438	56	0.0673666	56	0.125467		56	0.160511	0.0849893									56	0.0691292	56	0.105726	56	0.0801872	56	0.0947931	56	0.071283		56	0.0842238	0.0156977											56	0.180422
58	0.132758	58	0.263212	58	0.0886804	58	0.285377	58	0.0645738	58	0.114419		58	0.15817	0.0931283									58	0.061234	58	0.0813823	58	0.0933781	58	0.0970942	58	0.0700174		58	0.0806212	0.0151903											58	0.181137
60	0.156408	60	0.213436	60	0.0965573	60	0.269844	60	0.0587276	60	0.0965944		60	0.148594	0.0805666									60	0.0672411	60	0.0986423	60	0.106385	60	0.0921836	60	0.0776103		60	0.0884123	0.0158649											60	0.18352
62	0.159812	62	0.240069	62	0.0850034	62	0.239104	62	0.0410065	62	0.0925239		62	0.14292	0.0839705									62	0.0488755	62	0.102615	62	0.096729	62	0.0929579	62	0.0860261		62	0.0854406	0.0213087											62	0.201358
64	0.149499	64	0.283238	64	0.0800801	64	0.258137	64	0.0503829	64	0.0871962		64	0.151422	0.0981739									64	0.0600215	64	0.103516	64	0.0957194	64	0.0912506	64	0.0792761		64	0.0859567	0.0169479											64	0.180062
66	0.15623	66	0.256985	66	0.0658339	66	0.279093	66	0.079869	66	0.104347		66	0.157059	0.0915827									66	0.0756034	66	0.117917	66	0.104715	66	0.120729	66	0.0831411		66	0.100421	0.0203191											66	0.201501
68	0.151734	68	0.191398	68	0.102091	68	0.293625	68	0.0477316	68	0.123831		68	0.151735	0.0845761									68	0.0761237	68	0.117471	68	0.110274	68	0.0975223	68	0.0870692		68	0.0976919	0.0167896											68	0.195946
70	0.170275	70	0.203393	70	0.0831123	70	0.223788	70	0.0583748	70	0.163696		70	0.15044	0.0659729									70	0.0814901	70	0.120302	70	0.128056	70	0.107774	70	0.0994921		70	0.107423	0.018215											70	0.205577
72	0.187118	72	0.203556	72	0.0693002	72	0.227962	72	0.0702108	72	0.183235		72	0.156897	0.0693138									72	0.0824861	72	0.107762	72	0.116466	72	0.107155	72	0.0879599		72	0.100366	0.014436											72	0.231282
74	0.180104	74	0.148907	74	0.0914164	74	0.189354	74	0.080728	74	0.173059		74	0.143928	0.0468985									74	0.0819604	74	0.118745	74	0.136085	74	0.094081	74	0.0934977		74	0.104874	0.0220081											74	0.20525
76	0.188588	76	0.188268	76	0.0708004	76	0.236196	76	0.0718586	76	0.162581		76	0.153049	0.0676231									76	0.076789	76	0.119641	76	0.123399	76	0.0996775	76	0.0835001		76	0.100601	0.0208722											76	0.223581
78	0.181611	78	0.261719	78	0.0980719	78	0.230444	78	0.0969056	78	0.1518		78	0.170092	0.0678943									78	0.0724718	78	0.10545	78	0.148472	78	0.0938675	78	0.0772564		78	0.0995034	0.0303754											78	0.181628
80	0.162206	80	0.270289	80	0.0712636	80	0.208736	80	0.0789878	80	0.148116		80	0.1566	0.0762271									80	0.076686	80	0.110276	80	0.158635	80	0.117463	80	0.0843762		80	0.109487	0.0323506											80	0.166981
82	0.139965	82	0.180156	82	0.133283	82	0.212679	82	0.0854722	82	0.149582		82	0.15019	0.0433174									82	0.0760155	82	0.112502	82	0.132626	82	0.114619	82	0.0826839		82	0.103689	0.0236724											82	0.201328
84	0.127319	84	0.268846	84	0.141693	84	0.151045	84	0.0698861	84	0.128861		84	0.147942	0.0656483									84	0.0849673	84	0.118257	84	0.151873	84	0.116558	84	0.0903833		84	0.112408	0.0266787											84	0.191209
86	0.131361	86	0.257928	86	0.121625	86	0.236535	86	0.0679805	86	0.152511		86	0.161323	0.0724617									86	0.0729967	86	0.105883	86	0.145758	86	0.110094	86	0.105527		86	0.108052	0.0258159											86	0.208379
88	0.12424	88	0.20976	88	0.134786	88	0.212678	88	0.047332	88	0.185583		88	0.152396	0.0635094									88	0.0727056	88	0.139537	88	0.152454	88	0.113711	88	0.10853		88	0.117387	0.0308571											88	0.225979
90	0.142254	90	0.23408	90	0.181424	90	0.198777	90	0.0605063	90	0.1337		90	0.158457	0.060567									90	0.0895705	90	0.131653	90	0.157735	90	0.112999	90	0.112359		90	0.120863	0.0254429											90	0.202005
92	0.139625	92	0.235126	92	0.137194	92	0.217388	92	0.0252373	92	0.132077		92	0.147775	0.0747213									92	0.0823127	92	0.110024	92	0.157872	92	0.108356	92	0.114267		92	0.114566	0.0272716											92	0.227591
94	0.130967	94	0.19968	94	0.132996	94	0.272155	94	0.0526647	94	0.12202		94	0.151747	0.0752064									94	0.0930974	94	0.140235	94	0.15681	94	0.122932	94	0.117264		94	0.126068	0.0240842											94	0.221276
96	0.161164	96	0.19958	96	0.148153	96	0.221811	96	0.0283017	96	0.143659		96	0.150445	0.06722									96	0.0840267	96	0.145192	96	0.179689	96	0.110989	96	0.105251		96	0.12503	0.0376289											96	0.23604
98	0.135498	98	0.173346	98	0.166073	98	0.173185	98	0.0397996	98	0.128518		98	0.13607	0.0509755									98	0.0801993	98	0.121694	98	0.152184	98	0.0998541	98	0.103135		98	0.111413	0.0271311											98	0.182298
100	0.088979	100	0.229656	100	0.159922	100	0.216937	100	0.0497514	100	0.115795		100	0.143507	0.0715744									100	0.0831908	100	0.135759	100	0.145332	100	0.0992115	100	0.104916		100	0.113682	0.0260052											100	0.199665
102	0.097029	102	0.268114	102	0.211325	102	0.170596	102	0.0417508	102	0.0872436		102	0.14601	0.0854429									102	0.0927265	102	0.138404	102	0.148268	102	0.119388	102	0.0974301		102	0.119243	0.0244364											102	0.237169
104	0.133284	104	0.170206	104	0.187413	104	0.135695	104	0.0597922	104	0.139854		104	0.137707	0.0438767									104	0.089931	104	0.118419	104	0.146568	104	0.118315	104	0.110025		104	0.116652	0.0203639											104	0.252924
106	0.169097	106	0.193319	106	0.209161	106	0.115218	106	0.0614348	106	0.145768		106	0.149	0.0544183									106	0.0937987	106	0.135736	106	0.156504	106	0.0962955	106	0.0966499		106	0.115797	0.0286597											106	0.23731
108	0.156951	108	0.157823	108	0.182127	108	0.13689	108	0.093162	108	0.18274		108	0.151616	0.0334674									108	0.0695236	108	0.148497	108	0.144272	108	0.0894174	108	0.11199		108	0.11274	0.0342233											108	0.245228
110	0.135379	110	0.177295	110	0.235431	110	0.150939	110	0.0771072	110	0.159992		110	0.156024	0.051872									110	0.103354	110	0.136623	110	0.16301	110	0.0916368	110	0.107908		110	0.120506	0.0289513											110	0.238294
112	0.135694	112	0.245105	112	0.15247	112	0.0808207	112	0.082965	112	0.155566		112	0.142104	0.0603194									112	0.117924	112	0.144695	112	0.149491	112	0.0930826	112	0.116726		112	0.124383	0.0230381											112	0.238893
114	0.125723	114	0.214519	114	0.195786	114	0.109998	114	0.0942935	114	0.136711		114	0.146172	0.0482503									114	0.125903	114	0.146719	114	0.150439	114	0.0873159	114	0.114335		114	0.124942	0.0257561											114	0.215085
116	0.131796	116	0.310822	116	0.162515	116	0.0869773	116	0.0939198	116	0.126321		116	0.152058	0.0824667									116	0.126678	116	0.148808	116	0.159285	116	0.0995017	116	0.1177		116	0.130394	0.023995											116	0.220921
118	0.131906	118	0.214381	118	0.173554	118	0.026457	118	0.081761	118	0.143105		118	0.128527	0.0666749									118	0.124789	118	0.170652	118	0.168594	118	0.109397	118	0.109		118	0.136486	0.0309206											118	0.255166
120	0.158184	120	0.222457	120	0.164344	120	0.0741668	120	0.0855211	120	0.187835		120	0.148751	0.0580571									120	0.124908	120	0.145044	120	0.188091	120	0.107744	120	0.103656		120	0.133889	0.0344259											120	0.21041
122	0.152593	122	0.257834	122	0.196078	122	0.053719	122	0.100887	122	0.117378		122	0.146415	0.072701									122	0.126223	122	0.158384	122	0.203544	122	0.109442	122	0.116539		122	0.142826	0.0387618											122	0.208236
124	0.159506	124	0.228322	124	0.14866	124	0.0351395	124	0.0609542	124	0.129207		124	0.126965	0.0701387									124	0.129548	124	0.174791	124	0.187529	124	0.110735	124	0.142947		124	0.14911	0.0317365											124	0.188272
126	0.134303	126	0.227262	126	0.132948	126	0.0829405	126	0.0928926	126	0.139638		126	0.134997	0.0510326									126	0.120925	126	0.188806	126	0.190601	126	0.0998842	126	0.11982		126	0.144007	0.0425518											126	0.214264
128	0.124258	128	0.187517	128	0.128982	128	0.164727	128	0.106891	128	0.110155		128	0.137088	0.0321703									128	0.126773	128	0.194513	128	0.168081	128	0.113837	128	0.125106		128	0.145662	0.0342099											128	0.1842
130	0.109754	130	0.234944	130	0.104852	130	0.142311	130	0.102352	130	0.0882061		130	0.130403	0.0542536									130	0.126696	130	0.167141	130	0.203073	130	0.135649	130	0.122851		130	0.151082	0.0338778											130	0.186099
132	0.140295	132	0.217522	132	0.12757	132	0.170149	132	0.068295	132	0.0487097		132	0.128757	0.062913									132	0.123472	132	0.183499	132	0.194743	132	0.114326	132	0.124186		132	0.148045	0.0379069											132	0.171091
134	0.0815381	134	0.218765	134	0.143507	134	0.118238	134	0.0818695	134	0.0745462		134	0.119744	0.0553338									134	0.133138	134	0.180749	134	0.204941	134	0.136893	134	0.146582		134	0.16046	0.0311636											134	0.170912
136	0.0787687	136	0.203278	136	0.189453	136	0.0865624	136	0.106426	136	0.0511769		136	0.119278	0.0624416									136	0.140367	136	0.180536	136	0.199333	136	0.140843	136	0.150109		136	0.162238	0.0264293											136	0.185981
138	0.071469	138	0.221217	138	0.108218	138	0.0832052	138	0.066496	138	0.0632121		138	0.102303	0.0604998									138	0.139279	138	0.194736	138	0.181672	138	0.142373	138	0.130699		138	0.157752	0.0285028											138	0.166262
140	0.0787287	140	0.235901	140	0.15466	140	0.00974299	140	0.0794847	140	0.0683641		140	0.10448	0.0791919									140	0.154904	140	0.170158	140	0.208743	140	0.135183	140	0.147046		140	0.163207	0.0284486											140	0.1973
142	0.0510446	142	0.201246	142	0.151011	142	0.0179094	142	0.0695243	142	0.141928		142	0.105444	0.069996									142	0.131508	142	0.196525	142	0.178305	142	0.15285	142	0.167		142	0.165238	0.0247181											142	0.20538
144	0.180573	144	0.148733	144	0.137212	144	-0.0304511	144	0.119233	144	0.100513		144	0.109302	0.073648									144	0.133601	144	0.178418	144	0.181553	144	0.145089	144	0.1438		144	0.156492	0.0219312											144	0.206053
146	0.199871	146	0.184447	146	0.147764	146	0.00101103	146	0.085212	146	0.122109		146	0.123402	0.0729481									146	0.146007	146	0.169161	146	0.162288	146	0.140893	146	0.148698		146	0.15341	0.0118384											146	0.182106
148	0.180183	148	0.212749	148	0.129312	148	-0.0447293	148	0.119329	148	0.104551		148	0.116899	0.0890262									148	0.161269	148	0.190682	148	0.179366	148	0.137337	148	0.144392		148	0.162609	0.0225899											148	0.2155
150	0.21306	150	0.18463	150	0.0982444	150	0.00266152	150	0.104337	150	0.0513175		150	0.109042	0.0791467									150	0.13498	150	0.183016	150	0.186367	150	0.154051	150	0.14136		150	0.159955	0.0236315											150	0.237817
152	0.170989	152	0.210256	152	0.150167	152	0.0339939	152	0.109028	152	0.0738924		152	0.124721	0.0650626									152	0.159243	152	0.20332	152	0.194868	152	0.156593	152	0.154447		152	0.173694	0.0234401											152	0.298672
154	0.230212	154	0.216923	154	0.111941	154	0.0529568	154	0.133853	154	0.0744235		154	0.136718	0.0730652									154	0.134682	154	0.193838	154	0.178011	154	0.14782	154	0.14262		154	0.159394	0.0252931											154	0.302905
156	0.160653	156	0.147413	156	0.182721	156	0.0620136	156	0.120239	156	0.0841151		156	0.126192	0.0463858									156	0.128142	156	0.206012	156	0.173842	156	0.163604	156	0.135747		156	0.161469	0.0312812											156	0.29041
158	0.221509	158	0.100816	158	0.152934	158	0.0822473	158	0.120744	158	0.125778		158	0.134005	0.0490695									158	0.130083	158	0.199325	158	0.188007	158	0.161529	158	0.125589		158	0.160907	0.0331974											158	0.296873
160	0.188581	160	0.121963	160	0.190673	160	0.157847	160	0.100417	160	0.0819894		160	0.140245	0.0458329									160	0.106416	160	0.176336	160	0.197205	160	0.151024	160	0.120361		160	0.150268	0.037751											160	0.293442
162	0.164788	162	0.0942262	162	0.199865	162	0.184857	162	0.0524462	162	0.0764986		162	0.12878	0.0620458									162	0.107804	162	0.180928	162	0.191413	162	0.136098	162	0.136615		162	0.150571	0.0347235											162	0.276304
164	0.219765	164	0.226909	164	0.178884	164	0.172664	164	0.0716308	164	0.0602322		164	0.155014	0.0723591									164	0.107208	164	0.19762	164	0.164341	164	0.114481	164	0.145171		164	0.145764	0.03708											164	0.290197
166	0.227701	166	0.16365	166	0.14469	166	0.216014	166	0.0809549	166	0.0606425		166	0.148942	0.0683449									166	0.122753	166	0.172188	166	0.191158	166	0.146357	166	0.135685		166	0.153628	0.0277536											166	0.304166
168	0.222343	168	0.210481	168	0.159271	168	0.224202	168	0.0697863	168	0.129706		168	0.169298	0.0617979									168	0.108627	168	0.191705	168	0.188822	168	0.135749	168	0.112416		168	0.147464	0.0404403											168	0.276184
170	0.1993	170	0.173049	170	0.0912137	170	0.18052	170	0.0825487	170	0.132743		170	0.143229	0.0488293									170	0.1306	170	0.186757	170	0.183861	170	0.123328	170	0.103921		170	0.145693	0.0374698											170	0.223947
172	0.243856	172	0.254459	172	0.0668839	172	0.197794	172	0.0875947	172	0.179337		172	0.171654	0.0785556									172	0.135209	172	0.207005	172	0.183906	172	0.145519	172	0.107293		172	0.155786	0.0396689											172	0.272875
174	0.208115	174	0.238269	174	0.0740718	174	0.176777	174	0.0797859	174	0.195061		174	0.162013	0.0689137									174	0.123336	174	0.19923	174	0.183682	174	0.143612	174	0.109063		174	0.151785	0.0386319											174	0.240482
176	0.213157	176	0.19988	176	0.0729428	176	0.284376	176	0.0789395	176	0.167728		176	0.169504	0.0819182									176	0.130006	176	0.210588	176	0.162755	176	0.135494	176	0.112692		176	0.150307	0.0381942											176	0.217908
178	0.210384	178	0.262737	178	0.10406	178	0.268257	178	0.0804709	178	0.170767		178	0.182779	0.079082									178	0.141409	178	0.191466	178	0.20349	178	0.122092	178	0.121355		178	0.155962	0.0389744											178	0.213165
180	0.242352	180	0.188755	180	0.153758	180	0.362071	180	0.0545374	180	0.130261		180	0.188622	0.105424									180	0.143943	180	0.204278	180	0.18666	180	0.125023	180	0.12755		180	0.157491	0.0359654											180	0.204341
182	0.211692	182	0.142763	182	0.0962755	182	0.22647	182	0.0757896	182	0.120359		182	0.145558	0.061416									182	0.149589	182	0.22855	182	0.183131	182	0.119487	182	0.12056		182	0.160263	0.0462032											182	0.239195
184	0.215357	184	0.155863	184	0.0661415	184	0.238278	184	0.0717662	184	0.130542		184	0.146324	0.0714832									184	0.136246	184	0.202638	184	0.188838	184	0.124553	184	0.119168		184	0.154289	0.0386476											184	0.214088
186	0.226413	186	0.148178	186	0.109951	186	0.248033	186	0.061717	186	0.141819		186	0.156018	0.0702853									186	0.147146	186	0.205641	186	0.187576	186	0.122755	186	0.127297		186	0.158083	0.0369021											186	0.2123
188	0.182317	188	0.15975	188	0.101585	188	0.303778	188	0.0641291	188	0.207603		188	0.16986	0.08421									188	0.141994	188	0.232309	188	0.183791	188	0.106055	188	0.139218		188	0.160673	0.0486276											188	0.255943
190	0.20773	190	0.128326	190	0.145523	190	0.339575	190	0.0824315	190	0.207759		190	0.185224	0.0896865									190	0.127413	190	0.226545	190	0.186512	190	0.117495	190	0.135568		190	0.158706	0.0463364											190	0.300677
192	0.205662	192	0.121771	192	0.140783	192	0.270709	192	0.0507947	192	0.1486		192	0.156387	0.0750328									192	0.142283	192	0.202942	192	0.167287	192	0.125183	192	0.130101		192	0.153559	0.0320537											192	0.266419
194	0.225415	194	0.164301	194	0.156676	194	0.298506	194	0.100951	194	0.181438		194	0.187881	0.0674903									194	0.124175	194	0.213573	194	0.181473	194	0.107423	194	0.124734		194	0.150275	0.0451381											194	0.268122
196	0.201585	196	0.175475	196	0.104857	196	0.341047	196	0.104138	196	0.19258		196	0.186614	0.0868559									196	0.117641	196	0.249203	196	0.177028	196	0.114556	196	0.144283		196	0.160542	0.0555698											196	0.26488
198	0.217497	198	0.118008	198	0.151181	198	0.363107	198	0.0734016	198	0.186261		198	0.184909	0.100862									198	0.135763	198	0.212744	198	0.181848	198	0.0885402	198	0.140034		198	0.151786	0.0474723											198	0.281478
200	0.206031	200	0.23019	200	0.163033	200	0.319371	200	0.052746	200	0.173749		200	0.190854	0.0876752									200	0.133881	200	0.220313	200	0.183944	200	0.0766333	200	0.143254		200	0.151605	0.0542475											200	0.271265
202	0.206067	202	0.256406	202	0.128148	202	0.290101	202	0.0609366	202	0.150266		202	0.181987	0.0852815									202	0.119698	202	0.21031	202	0.176207	202	0.139206	202	0.126027		202	0.15429	0.038215											202	0.278425
204	0.209468	204	0.236245	204	0.176314	204	0.401516	204	0.0810248	204	0.115616		204	0.203364	0.112943									204	0.172123	204	0.199305	204	0.1777	204	0.188646	204	0.111596		204	0.169874	0.0342099											204	0.30743
206	0.150861	206	0.149372	206	0.233771	206	0.351812	206	0.0649761	206	0.0944725		206	0.174211	0.104444									206	0.164704	206	0.229893	206	0.176408	206	0.159536	206	0.114935		206	0.169095	0.0412126											206	0.314828
208	0.171396	208	0.16638	208	0.196876	208	0.385149	208	0.0785913	208	0.0746249		208	0.178836	0.113146									208	0.155135	208	0.254536	208	0.184473	208	0.175504	208	0.12134		208	0.178198	0.0490887											208	0.291687
210	0.188651	210	0.149461	210	0.209233	210	0.373629	210	0.0458723	210	0.134638		210	0.183581	0.108927									210	0.16333	210	0.265241	210	0.174525	210	0.165295	210	0.119275		210	0.177533	0.0534956											210	0.289841
212	0.184893	212	0.0439839	212	0.238222	212	0.225662	212	0.0717154	212	0.108847		212	0.145554	0.0820587									212	0.16369	212	0.240204	212	0.191438	212	0.161616	212	0.114152		212	0.17422	0.0461741											212	0.308813
214	0.211329	214	0.126891	214	0.249708	214	0.234442	214	0.00914009	214	0.118727		214	0.158373	0.0913961									214	0.144064	214	0.261954	214	0.213943	214	0.153165	214	0.10098		214	0.174821	0.0632262											214	0.317941
216	0.191607	216	0.1538	216	0.176229	216	0.255795	216	0.0759559	216	0.0623065		216	0.152616	0.0731542									216	0.16734	216	0.262857	216	0.196427	216	0.150849	216	0.103298		216	0.176154	0.0590646											216	0.3544
218	0.20327	218	0.24026	218	0.205461	218	0.277492	218	0.0544418	218	0.0756098		218	0.176089	0.090439									218	0.166305	218	0.275888	218	0.210623	218	0.151783	218	0.11698		218	0.184316	0.061226											218	0.359029
220	0.150247	220	0.204377	220	0.265683	220	0.280691	220	0.0671864	220	0.0540634		220	0.170375	0.096944									220	0.199723	220	0.276785	220	0.200801	220	0.150554	220	0.119706		220	0.189514	0.0596634											220	0.343788
222	0.173889	222	0.250231	222	0.180916	222	0.298246	222	0.0434032	222	0.075198		222	0.170314	0.0980123									222	0.170258	222	0.297203	222	0.191603	222	0.15956	222	0.122379		222	0.188201	0.0658933											222	0.372372
224	0.185755	224	0.272797	224	0.173813	224	0.248654	224	0.0623195	224	0.0592363		224	0.167096	0.0903654									224	0.16089	224	0.277644	224	0.19723	224	0.134694	224	0.128116		224	0.179715	0.0611159											224	0.392942
226	0.201443	226	0.283995	226	0.242122	226	0.212851	226	0.0372093	226	0.0660162		226	0.173939	0.0993722									226	0.161776	226	0.273337	226	0.197969	226	0.126632	226	0.135929		226	0.179129	0.0594838											226	0.40857
228	0.197423	228	0.226461	228	0.182523	228	0.235651	228	0.0560734	228	0.056313		228	0.159074	0.0819688									228	0.169323	228	0.297151	228	0.193821	228	0.14667	228	0.139162		228	0.189225	0.063997											228	0.398655
230	0.21015	230	0.165359	230	0.199216	230	0.169923	230	0.0633729	230	0.0406833		230	0.141451	0.0716783									230	0.167414	230	0.272906	230	0.187993	230	0.170209	230	0.13867		230	0.187438	0.0509441											230	0.356221
232	0.227196	232	0.178143	232	0.262516	232	0.156575	232	0.0740138	232	0.114129		232	0.168762	0.0698611									232	0.163762	232	0.207723	232	0.185071	232	0.158079	232	0.143105		232	0.171548	0.0252115											232	0.427574
234	0.220648	234	0.202089	234	0.128956	234	0.143074	234	0.0801249	234	0.0647676		234	0.139943	0.0628258									234	0.150912	234	0.22173	234	0.194939	234	0.18393	234	0.137115		234	0.177725	0.0340568											234	0.371252
236	0.220079	236	0.283121	236	0.160286	236	0.155559	236	0.080327	236	0.149955		236	0.174888	0.0691476									236	0.158611	236	0.207077	236	0.19489	236	0.154363	236	0.132961		236	0.16958	0.0305754											236	0.38457
238	0.18858	238	0.138915	238	0.187832	238	0.135177	238	0.0728823	238	0.22733		238	0.158453	0.0543335									238	0.170242	238	0.191924	238	0.196329	238	0.165679	238	0.128771		238	0.170589	0.0268827											238	0.378507
240	0.219483	240	0.122976	240	0.181035	240	0.145134	240	0.0664789	240	0.236925		240	0.162005	0.0635798									240	0.134839	240	0.218264	240	0.195078	240	0.14815	240	0.118732		240	0.163012	0.0420009											240	0.352679
242	0.240886	242	0.129094	242	0.166288	242	0.181904	242	0.0657952	242	0.242799		242	0.171128	0.0678297									242	0.168337	242	0.216568	242	0.180879	242	0.126531	242	0.131304		242	0.164724	0.037207											242	0.358594
244	0.211968	244	0.110149	244	0.229759	244	0.173077	244	0.0322057	244	0.241751		244	0.166485	0.0812225									244	0.147555	244	0.237824	244	0.196521	244	0.12831	244	0.161443		244	0.174331	0.0433726											244	0.332909
246	0.264834	246	0.052291	246	0.158916	246	0.144806	246	0.0909992	246	0.239096		246	0.15849	0.082252									246	0.145708	246	0.256358	246	0.192565	246	0.146674	246	0.1569		246	0.179641	0.0469252											246	0.360142
248	0.25471	248	-0.085887	248	0.17368	248	0.162199	248	0.0862998	248	0.25049		248	0.140249	0.127202									248	0.145215	248	0.303467	248	0.188037	248	0.154924	248	0.13385		248	0.185099	0.0691871											248	0.328963
250	0.256179	250	0.279755	250	0.132232	250	0.11109	250	0.105633	250	0.265883		250	0.191795	0.0834939									250	0.175165	250	0.234505	250	0.179858	250	0.148268	250	0.154971		250	0.178553	0.0339746											250	0.351891
252	0.232126	252	0.351852	252	0.177892	252	0.123296	252	0.10957	252	0.304326		252	0.21651	0.0978666									252	0.154181	252	0.247975	252	0.16651	252	0.14996	252	0.154257		252	0.174577	0.0414945											252	0.360864
254	0.271561	254	0.29831	254	0.169683	254	0.132565	254	0.10286	254	0.29964		254	0.212436	0.0879646									254	0.164274	254	0.264224	254	0.18678	254	0.165271	254	0.167998		254	0.189709	0.0426513											254	0.314956
256	0.207842	256	0.343092	256	0.153618	256	0.174144	256	0.101584	256	0.192027		256	0.195384	0.0812132									256	0.201376	256	0.279872	256	0.189397	256	0.152304	256	0.137476		256	0.192085	0.0555987											256	0.338387
258	0.231285	258	0.23098	258	0.173835	258	0.118598	258	0.0974584	258	0.247555		258	0.183285	0.0637955									258	0.174376	258	0.258538	258	0.160234	258	0.151323	258	0.160996		258	0.181093	0.0440685											258	0.334765
260	0.243096	260	0.201627	260	0.135062	260	0.115141	260	0.0733864	260	0.216837		260	0.164192	0.06618									260	0.169177	260	0.285435	260	0.155082	260	0.141257	260	0.148792		260	0.179949	0.0598529											260	0.336915
262	0.301402	262	0.153356	262	0.144188	262	0.185203	262	0.0607914	262	0.260162		262	0.184184	0.0863592									262	0.164529	262	0.283224	262	0.192443	262	0.141439	262	0.14534		262	0.185395	0.0582928											262	0.349251
264	0.299411	264	0.155423	264	0.142858	264	0.215339	264	0.0868492	264	0.242973		264	0.190475	0.0767798									264	0.163233	264	0.263601	264	0.183049	264	0.134029	264	0.132125		264	0.175207	0.053782											264	0.293836
266	0.306402	266	0.188617	266	0.133021	266	0.296762	266	0.0746428	266	0.259278		266	0.209787	0.0937589									266	0.158327	266	0.313041	266	0.163815	266	0.132615	266	0.130808		266	0.179721	0.0759876											266	0.289426
268	0.305461	268	0.175122	268	0.0813054	268	0.344808	268	0.0560123	268	0.313353		268	0.212677	0.126028									268	0.13866	268	0.248588	268	0.193597	268	0.137261	268	0.138442		268	0.17131	0.0494323											268	0.301227
270	0.256858	270	0.056137	270	0.123486	270	0.28681	270	0.0579681	270	0.282057		270	0.177219	0.110555									270	0.148617	270	0.228118	270	0.184166	270	0.129668	270	0.153743		270	0.168863	0.0384712											270	0.319737
272	0.284752	272	0.239044	272	0.134138	272	0.338462	272	0.0945363	272	0.311511		272	0.233741	0.0989379									272	0.124274	272	0.279184	272	0.189464	272	0.145299	272	0.129019		272	0.173448	0.064461											272	0.327457
274	0.264143	274	0.196021	274	0.184227	274	0.205	274	0.0608821	274	0.331989		274	0.207044	0.0904224									274	0.132245	274	0.231963	274	0.207618	274	0.130686	274	0.126912		274	0.165885	0.0499936											274	0.329949
276	0.183699	276	0.165545	276	0.170977	276	0.237891	276	0.0627304	276	0.300333		276	0.186863	0.0795048									276	0.14487	276	0.191197	276	0.188229	276	0.137289	276	0.148568		276	0.162031	0.0256169											276	0.314977
278	0.208921	278	0.238573	278	0.228302	278	0.237524	278	0.117291	278	0.341717		278	0.228721	0.0717658									278	0.147945	278	0.248589	278	0.201581	278	0.128897	278	0.15791		278	0.176984	0.048093											278	0.289539
280	0.205162	280	0.250273	280	0.272333	280	0.223062	280	0.0666121	280	0.308409		280	0.220975	0.0839322									280	0.166441	280	0.243189	280	0.205814	280	0.13361	280	0.145482		280	0.178907	0.0452231											280	0.269954
282	0.218525	282	0.206943	282	0.231455	282	0.305924	282	0.125943	282	0.31707		282	0.23431	0.0703241									282	0.141107	282	0.271351	282	0.200267	282	0.114763	282	0.129417		282	0.171381	0.0646362											282	0.278041
284	0.229307	284	0.218919	284	0.296693	284	0.346427	284	0.0823401	284	0.314857		284	0.24809	0.0950443									284	0.124256	284	0.261818	284	0.213804	284	0.135348	284	0.136399		284	0.174325	0.0605766											284	0.325337
286	0.201678	286	0.312033	286	0.282458	286	0.279257	286	0.106649	286	0.287682		286	0.24496	0.0773428									286	0.150398	286	0.277159	286	0.216038	286	0.137698	286	0.155299		286	0.187319	0.0586228											286	0.266079
288	0.139318	288	0.302202	288	0.202822	288	0.314061	288	0.134927	288	0.271796		288	0.227521	0.0799878									288	0.162924	288	0.27228	288	0.20944	288	0.133578	288	0.126563		288	0.180957	0.0605803											288	0.305723
290	0.196734	290	0.278348	290	0.259687	290	0.290077	290	0.114189	290	0.271172		290	0.235034	0.0676609									290	0.126618	290	0.283726	290	0.21044	290	0.136246	290	0.132292		290	0.177865	0.0683795											290	0.296808
292	0.20497	292	0.301245	292	0.261946	292	0.256204	292	0.121843	292	0.235512		292	0.230287	0.0618666									292	0.149605	292	0.238417	292	0.18605	292	0.139558	292	0.139056		292	0.170537	0.0425361											292	0.319144
294	0.234036	294	0.337915	294	0.270114	294	0.242622	294	0.129431	294	0.104111		294	0.219705	0.0880417									294	0.147277	294	0.295099	294	0.206956	294	0.11698	294	0.139859		294	0.181234	0.071799											294	0.296783
296	0.219876	296	0.312601	296	0.235386	296	0.25335	296	0.100327	296	0.230418		296	0.225326	0.0695469									296	0.150643	296	0.266186	296	0.200687	296	0.135562	296	0.133434		296	0.177303	0.0566227											296	0.32891
298	0.215105	298	0.303578	298	0.196684	298	0.265232	298	0.0891462	298	0.272766		298	0.223752	0.076709									298	0.155773	298	0.268006	298	0.206638	298	0.109762	298	0.143936		298	0.176823	0.0616949											298	0.332976
300	0.191991	300	0.319655	300	0.21838	300	0.259859	300	0.111488	300	0.253938		300	0.225885	0.0707473									300	0.159723	300	0.304899	300	0.213651	300	0.130289	300	0.152661		300	0.192245	0.0700221											300	0.306067
302	0.202043	302	0.127512	302	0.191814	302	0.310174	302	0.111679	302	0.240721		302	0.197324	0.073321									302	0.145223	302	0.353859	302	0.210117	302	0.0978757	302	0.172178		302	0.19585	0.0973303											302	0.299062
304	0.178338	304	0.0439249	304	0.195862	304	0.28181	304	0.0955183	304	0.2111		304	0.167759	0.0852543									304	0.153205	304	0.342196	304	0.219821	304	0.107964	304	0.150002		304	0.194637	0.0916911											304	0.30326
306	0.176287	306	-0.0372293	306	0.220677	306	0.292995	306	0.141119	306	0.241371		306	0.172537	0.115385									306	0.137665	306	0.34111	306	0.185486	306	0.108791	306	0.156498		306	0.18591	0.0911419											306	0.332439
308	0.183793	308	-0.0496885	308	0.191318	308	0.301292	308	0.0993842	308	0.28559		308	0.168615	0.129986									308	0.154557	308	0.297139	308	0.182011	308	0.115472	308	0.157333		308	0.181302	0.0689965											308	0.308582
310	0.164959	310	0.222492	310	0.194332	310	0.248503	310	0.0948104	310	0.306622		310	0.205286	0.0726413									310	0.148294	310	0.293906	310	0.191179	310	0.110183	310	0.14872		310	0.178456	0.0706144											310	0.346961
312	0.188274	312	0.346318	312	0.210767	312	0.300151	312	0.184799	312	0.258615		312	0.248154	0.0654929									312	0.117851	312	0.302485	312	0.18776	312	0.115985	312	0.141294		312	0.173075	0.0779128											312	0.279655
314	0.191139	314	0.233372	314	0.160491	314	0.243039	314	0.181986	314	0.295486		314	0.217586	0.0493806									314	0.104593	314	0.293259	314	0.202195	314	0.107618	314	0.150405		314	0.171614	0.0786921											314	0.268685
316	0.149765	316	0.136302	316	0.150739	316	0.261071	316	0.113293	316	0.302621		316	0.185632	0.0768735									316	0.10547	316	0.300066	316	0.238544	316	0.123429	316	0.141815		316	0.181865	0.0837242											316	0.305701
318	0.178882	318	0.160372	318	0.148153	318	0.205776	318	0.14915	318	0.294238		318	0.189428	0.0557382									318	0.093612	318	0.288497	318	0.189138	318	0.113958	318	0.15119		318	0.167279	0.0769748											318	0.336506
320	0.187509	320	0.155827	320	0.151941	320	0.122743	320	0.119669	320	0.231394		320	0.161514	0.0422778									320	0.105004	320	0.325681	320	0.196724	320	0.112482	320	0.131997		320	0.174377	0.0919672											320	0.287994
322	0.171747	322	0.0237353	322	0.111731	322	0.15424	322	0.136059	322	0.271152		322	0.144777	0.0807549									322	0.12603	322	0.291436	322	0.234355	322	0.122776	322	0.167025		322	0.188325	0.0731122											322	0.28731
324	0.181555	324	0.360065	324	0.0948429	324	0.205042	324	0.156799	324	0.312787		324	0.218515	0.0995739									324	0.157639	324	0.327431	324	0.215361	324	0.116866	324	0.146547		324	0.192768	0.0833308											324	0.243316
326	0.195262	326	0.165073	326	0.135088	326	0.197766	326	0.112854	326	0.255349		326	0.176899	0.0508267									326	0.11996	326	0.355086	326	0.210686	326	0.128252	326	0.131573		326	0.189112	0.0997616											326	0.214008
328	0.171806	328	0.0353412	328	0.109071	328	0.0664768	328	0.147885	328	0.230771		328	0.126892	0.0715512									328	0.146664	328	0.332017	328	0.201563	328	0.125628	328	0.135282		328	0.188231	0.0855902											328	0.160319
330	0.206466	330	0.295155	330	0.174199	330	0.0337535	330	0.123211	330	0.26122		330	0.182334	0.0950494									330	0.17496	330	0.334878	330	0.187182	330	0.0999945	330	0.156622		330	0.190727	0.0872299											330	0.155717
[truncated: 17 more columns]

## Sheet: Figure 4E raw data
FRAP of Bfa1-GFP at the dSPB of W303 kar9∆ cells with normal aligned spindles (Experiment 1)																																FRAP of Bfa1-GFP at the dSPB of W303 spc72∆ cells with normal aligned spindles (Experiment 1)
		cell 1					cell2					cell3					cell4					cell5					cell6					cell 1					cell2					cell3					cell4
time (s)		Frap ROI mean	background mean	ref mean	normalized 0-1		Frap ROI mean	background mean	ref mean	normalized 0-1		Frap ROI mean	background mean	ref mean	normalized 0-1		Frap ROI mean	background mean	ref mean	normalized 0-1		Frap ROI mean	background mean	ref mean	normalized 0-1		Frap ROI mean	background mean	ref mean	normalized 0-1		Frap ROI mean	background mean	ref mean	normalized 0-1		Frap ROI mean	background mean	ref mean	normalized 0-1		Frap ROI mean	background mean	ref mean	normalized 0-1		Frap ROI mean	background mean	ref mean
0		812.633	500.026	546.985	0.942257		671.082	492.224	524.139	1.02834		721.388	505.857	536.165	0.875949		659.122	471.027	498.436	0.935217		731.143	495.952	530.841	0.984915		747	479.803	528.491	0.89517		1131.35	511.519	545.213	0.954109		920.204	494.243	534.312	0.984726		912.796	499.694	543.105	0.972649		976.796	496.158	541.152
2		802.592	496.585	539.86	1.01176		654.245	489.539	520.553	0.95842		730.653	504.867	532.749	1.04256		663.469	468.293	495.248	1.01407		718.918	492.8	525.499	1.01384		755.122	477.652	523.122	1.02892		1129.39	507.974	539.91	1.01301		914.408	491	529.591	1.01819		914.122	495.665	538.076	1.01223		931.184	494.274	537.593
4		793.878	493.386	534.69	1.04598		656.122	487.238	517.718	1.01324		738.878	501.435	529.945	1.08149		663.755	466.614	493.195	1.05071		711.571	489.984	522.383	1.00124		747.02	475.331	518.333	1.07591		1119.78	505.322	536.329	1.03288		908.857	487.777	526.923	0.997087		907.51	493.385	535.248	1.01512		906.061	491.447	533.88
6		532.571	490.018	530.858	0		524.02	484.759	515.252	0		553.612	498.296	527.037	0		527.918	464.397	491.132	0		513.122	487.873	518.785	0		531.469	473.201	515.532	0		540.163	501.594	534.087	0		509.041	486.862	524.096	0		527.816	491.02	531.957	0		511.265	488.865	530.388
8		535.735	488.518	527.076	0.0306463		527	483.592	512.379	0.0524958		558.837	496.034	524.397	0.048912		522.592	463.581	488.616	-0.00392072		513.286	484.835	516.156	0.0152227		530.306	471.151	512.529	0.0115697		539.673	499.272	530.535	0.00583817		508.959	483.695	519.802	0.0102086		527.653	488.5	528.733	0.00838777		517.408	488.778	528.473
10		532.429	485.335	524.314	0.0278973		522.204	482.526	510.623	0.029692		557.694	494.49	522.711	0.0531934		525.265	462.519	487.412	0.030158		512.755	484.043	513.751	0.0248828		528.714	469.709	509.844	0.0203961		540.857	497.133	528.08	0.0125231		509.02	482.743	518.049	0.0145819		530.041	487.088	526.723	0.0208667		519.918	487.767	527.362
12		538.306	485.504	522.01	0.0678698		518.449	481.662	508.952	0.0144035		556.796	493.35	521.181	0.0599621		530.102	461.33	485.742	0.091965		510.673	482.204	511.776	0.0242556		525.49	468.643	507.81	0.0163109		536.449	495.916	526.453	0.00778124		507.796	481.346	515.621	0.0172741		536.122	485.658	525.277	0.0423146		520.327	485.068	524.819
14		529.245	484.015	519.923	0.0365258		516.714	480.17	507.929	0.00689248		555.857	492.548	519.753	0.0679707		528.286	460.608	484.89	0.0857175		509.816	481.821	509.988	0.0294413		527.122	467.564	505.699	0.0403407		537.143	494.441	524.5	0.0129522		506.816	480.782	514.812	0.0166197		531.347	485.597	524.107	0.0326381		520.633	485.229	524.029
16		533.265	483.563	517.809	0.0686971		518.061	479.543	506.445	0.0343636		553.041	491.316	518.405	0.0597783		522.122	459.01	483.384	0.0444759		508.673	480.12	508.342	0.0324063		520.286	466.912	504.195	0.0119979		538.245	494.107	523.095	0.0186087		510.49	479.014	512.778	0.0330273		529.143	483.971	522.661	0.030328		523.918	484.263	523.009
18		526.918	480.224	515.958	0.04443		515.878	478.612	505.162	0.0276519		554.816	490.503	517.119	0.0830383		525.327	459.155	482.872	0.0863217		507.49	479.231	507.697	0.0292476		522.673	465.75	502.493	0.0376088		542.143	491.658	522.114	0.0260939		509.184	478.888	511.637	0.0323268		529.612	482.592	520.993	0.0367516		524.265	482.523	522.659
20		527.408	480.507	514.379	0.0575096		517.49	477.596	504.052	0.0525041		555.143	490.677	515.97	0.105405		528.306	458.519	481.938	0.125899		510.102	477.917	506.379	0.0522029		521.061	464.835	501.068	0.0381683		544.306	491.968	520.022	0.0376249		508.143	477.606	510.737	0.0319939		527.061	481.947	519.298	0.034877		526.429	482.624	522.108
22		524.265	479.728	512.644	0.0522062		516.571	476.786	502.797	0.0576516		555.265	488.741	514.801	0.106073		524.388	457.443	480.799	0.10221		505.204	477.839	504.829	0.0327664		519.122	464.208	500.04	0.0339773		544.51	490.458	518.908	0.0395254		507.388	476.439	509.411	0.0336562		528.816	480.894	518.606	0.0419764		530.612	481.632	521.008
24		528.755	478.629	511.336	0.0823323		513.082	475.925	501.875	0.0343826		546.204	488.684	514.055	0.0578455		530.082	456.625	480.422	0.148179		503.408	476.879	504.001	0.0268216		518.694	463.993	498.932	0.0411782		542.429	489.409	516.959	0.0408897		509.898	476.277	508.705	0.043287		526.755	481.007	517.579	0.0397377		530.082	482.271	519.246
26		528.469	477.096	509.962	0.0874551		512.388	475.754	501.153	0.0368771		545.184	488.636	513.075	0.0657302		524.061	455.944	479.253	0.113895		501.776	476.978	503.657	0.0187351		521.735	463.133	497.511	0.071447		546.204	488.565	516.964	0.0467174		509.571	475.719	508.096	0.0441474		529.918	479.85	516.716	0.0518382		528.755	482.195	519.206
28		526.714	478.081	508.951	0.0895205		512.245	475.372	500.373	0.0446244		542.898	487.704	512.194	0.0555792		521.673	456.503	478.563	0.120538		503.163	476.743	502.57	0.0342737		521.735	462.62	496.681	0.0781804		540.224	487.58	516.461	0.0352505		512.714	475.583	507.104	0.0571416		531.327	478.478	515.77	0.0585044		531.041	481.526	518.264
30		526.163	476.43	507.65	0.0924693		514.204	474.928	499.824	0.0691002		544.102	487.34	511.534	0.0711811		522.163	455.222	478.43	0.105984		498.306	475.368	501.488	0.0102036		521.449	462.274	495.957	0.0828088		544.388	487.849	515.853	0.0461268		509.041	474.721	504.813	0.0534643		531.612	478.414	515.389	0.0609412		527.02	480.098	517.302
32		524.306	475.313	506.633	0.087651		526.633	474.168	497.611	0.226419		540.306	486.918	510.795	0.052577		519.592	455.157	477.817	0.0974718		498.592	475.363	500.429	0.0182726		520.265	461.827	495.943	0.0732506		548.939	488.301	514.942	0.0603843		508.653	474.938	504.372	0.0539492		534.224	477.504	514.106	0.0734572		529.163	479.951	516.904
34		526.694	475.276	505.877	0.107117		527.061	472.993	496.44	0.242615		539.367	486.316	510.228	0.0496442		522.347	455.152	477.25	0.138581		496.082	475.008	499.988	0.00446087		521.367	461.603	494.329	0.097913		543.735	488.638	516.021	0.0457457		510.51	474.089	503.156	0.0645037		532	477.458	514.23	0.0659632		529.163	479.414	516.115
36		526.959	474.684	504.878	0.11568		525.306	472.388	495.868	0.230175		540.184	486.187	509.488	0.0663256		523.796	454.981	476.833	0.16117		498.245	474.492	499.531	0.0219179		518.796	461.131	493.812	0.0844766		541.551	485.583	513.313	0.0460912		506.837	474.011	503.625	0.0503202		532.633	476.518	513.588	0.0694069		527.306	478.91	515.276
38		521.204	473.724	503.754	0.0904724		521	472.346	495.19	0.200657		535.306	485.024	508.943	0.0299837		517.612	454.897	476.556	0.108312		498.959	473.942	498.74	0.0319247		517.224	460.977	492.799	0.085145		539.367	486.362	512.29	0.0475325		509.367	473.641	503.047	0.060767		532.224	477.165	512.942	0.0722503		529.612	478.654	515.206
40		523.224	473.64	503.099	0.1076		519.163	471.096	494.668	0.179054		542.163	484.711	508.246	0.0872269		521.694	454.423	475.774	0.161499		497.388	472.776	497.998	0.0264357		520.122	460.259	491.798	0.113561		542.143	485.452	511.433	0.0551672		505.592	472.768	502.9	0.0484438		529.612	476.91	512.245	0.0668941		524.837	478.229	514.11
42		522.408	474.037	502.171	0.113667		522.571	471.612	494.254	0.229435		536.02	484.595	507.833	0.0486945		525.245	454.131	475.84	0.187569		495.735	472.899	497.766	0.0168781		520.49	460.235	491.488	0.120073		540.367	485.4	510.72	0.0545504		507.061	472.796	501.28	0.0595928		532.592	476.13	511.762	0.0774015		525.571	477.44	514.179
44		523.49	473.761	501.863	0.122105		525.857	470.588	493.735	0.262096		537.061	483.643	507.107	0.0594395		525.653	454.019	475.456	0.201289		496.184	472.738	497.541	0.0213608		519.388	459.998	491.356	0.112662		543.184	485.409	509.859	0.0652006		508.612	472.836	501.168	0.0654595		531.714	475.293	510.838	0.0777091		525.184	478.102	512.91
46		520.408	471.651	500.962	0.104292		521.857	470.846	493.204	0.2368		533.347	484.68	506.725	0.0477911		522.224	452.938	475.245	0.152182		499.592	472.546	496.981	0.0482211		520.429	459.512	490.604	0.126883		538.286	484.258	509.696	0.0519455		510.408	472.703	500.704	0.0736844		530.184	475.429	511.1	0.0718046		526.49	477.534	512.725
48		526.571	471.908	500.223	0.149112		522.816	470.774	492.923	0.253018		543.592	484.245	506.391	0.127535		523.122	453.549	474.536	0.195754		499.184	472.48	497.308	0.0430183		513.429	460.104	490.292	0.084901		540.592	484.258	508.996	0.0604458		513.939	472.339	500.483	0.0865936		531.714	475.733	510.389	0.080872		523.612	477.545	512.366
50		522.224	472.04	499.336	0.133671		519.469	470.894	492.45	0.2301		544.959	483.823	506.038	0.13973		526.837	453.364	474.323	0.235464		496.776	472.311	497.038	0.028695		516.531	458.839	489.887	0.104872		543.939	483.73	508.68	0.0679839		504.959	472.344	499.86	0.0578612		530.571	475.183	510.394	0.0760972		523.816	476.662	511.786
52		521.878	471.974	499.004	0.134968		521.49	470.615	492.019	0.259512		541.959	483.776	505.542	0.126405		529.102	453.305	473.919	0.271194		500.51	471.814	496.158	0.0601771		517.857	458.866	489.634	0.117746		547.898	483.583	508.214	0.0789591		510.327	472.264	498.673	0.0829802		527.306	474.048	509.732	0.0670063		527.469	476.376	511.639
54		518.816	470.89	498.37	0.117816		522.429	470.249	491.554	0.276735		542.51	483.959	505.286	0.138612		525.918	452.598	473.596	0.232588		500.612	470.784	495.249	0.0669002		514.51	458.792	488.853	0.103858		542.143	482.67	507.726	0.0657893		514.612	472.019	498.232	0.100996		530.98	474.853	509.364	0.0821156		525.367	477.12	511.247
56		518.653	471.772	497.579	0.129994		518.653	470.154	491.15	0.243556		539.612	483.241	505.112	0.110246		530.224	452.867	473.495	0.286438		501.02	472.013	495.75	0.0673666		517.02	458.42	488.429	0.125467		543.571	483.107	507.95	0.0691292		515.959	471.495	498.071	0.105726		529.449	474.573	508.673	0.0801872		527.082	475.932	511.128
58		518.673	471.081	497.044	0.132758		520.939	469.088	490.761	0.263212		536.327	482.837	504.672	0.0886804		529.694	452.633	473.21	0.285377		499.551	471.555	494.784	0.0645738		515.898	458.526	488.69	0.114419		538.939	482.652	507.216	0.061234		510.735	470.879	498.848	0.0813823		533.612	473.786	508.445	0.0933781		525.98	476.801	510.132
60		522.469	470.221	496.689	0.156408		516.061	468.852	490.473	0.213436		535.612	483.238	504.218	0.0965573		528.673	452.848	473.506	0.269844		498.571	471.269	494.603	0.0587276		513.327	459.764	489.192	0.0965944		541.306	482.348	506.916	0.0672411		513.694	471.544	497.873	0.0986423		535.571	474.04	507.456	0.106385		524.673	477.109	510.414
62		520.918	470.963	496.012	0.159812		516.612	469.405	489.972	0.240069		535.224	482.088	503.973	0.0850034		525.571	451.961	472.855	0.239104		495.245	471.683	493.839	0.0410065		513.653	460.424	489.972	0.0925239		533.204	481.745	506.622	0.0488755		514.347	471.013	497.414	0.102615		533.367	474.454	508.007	0.096729		524.143	475.436	509.364
64		519.429	470.217	495.678	0.149499		520.816	468.681	489.733	0.283238		532.612	482.935	503.644	0.0800801		524.673	453.019	472.844	0.258137		496.571	470.98	493.832	0.0503829		509.714	458.754	487.432	0.0871962		536.878	481.539	505.922	0.0600215		513.51	471.518	496.959	0.103516		531.653	473.945	506.98	0.0957194		523.265	474.729	508.93
66		520.816	468.75	495.14	0.15623		516.98	469.297	489.448	0.256985		530.306	483.061	503.474	0.0658339		526.347	452.269	472.21	0.279093		500.122	471.015	493.453	0.079869		511.531	458.119	486.901	0.104347		542.265	482.374	505.855	0.0756034		516	471.094	496.079	0.117917		533.837	473.542	506.552	0.104715		531.367	476.188	508.583
68		518.041	469.79	494.583	0.151734		511.939	468.198	489.117	0.191398		534.204	482.66	503.04	0.102091		525.918	452.414	471.836	0.293625		495.122	471.155	492.866	0.0477316		514.224	458.353	487.075	0.123831		541.776	482.128	505.428	0.0761237		516.837	470.7	496.435	0.117471		534.673	472.756	505.764	0.110274		525.347	475.662	509.242
70		521.02	469.423	494.511	0.170275		511.694	468.662	488.758	0.203393		532.306	481.827	502.714	0.0831123		521.633	452.035	472.211	0.223788		496.776	470.89	493.054	0.0583748		520.184	457.892	487.16	0.163696		543.878	482.174	505.399	0.0814901		515.755	470.677	495.423	0.120302		539.408	472.795	505.555	0.128056		527.143	475.429	508.192
72		522.98	469.279	494.175	0.187118		511.122	468.586	488.444	0.203556		529.633	482.415	502.637	0.0693002		521.367	452.163	472.109	0.227962		497.612	471.008	492.478	0.0702108		520.286	458.038	486.102	0.183235		544.163	481.67	505.034	0.0824861		514.286	470.121	496.195	0.107762		537.143	472.67	506.064	0.116466		528.592	473.842	508.66
74		522.429	468.29	493.885	0.180104		506.735	467.494	488.011	0.148907		532.102	481.861	502.235	0.0914164		518.388	451.65	471.97	0.189354		498.918	470.75	492.378	0.080728		519.51	457.31	485.956	0.173059		543.184	481.928	504.911	0.0819604		516.469	471.206	496.272	0.118745		542.061	472.194	505.393	0.136085		522.633	474.778	507.863
76		521.571	469.129	493.343	0.188588		508.735	468.371	487.797	0.188268		528.776	482.112	502.021	0.0708004		521.286	451.631	471.481	0.236196		497.367	470.805	492.071	0.0718586		517.286	457.628	485.726	0.162581		538.918	482.316	504.323	0.076789		516.408	470.504	495.797	0.119641		536.531	472.694	504.739	0.123399		524.367	474.718	507.809
78		519.388	469.257	492.857	0.181611		515.204	467.667	487.589	0.261719		532.082	481.707	501.814	0.0980719		519.163	452.082	471.35	0.230444		500.041	470.653	491.649	0.0969056		515.653	457.318	485.449	0.1518		538.245	481.067	503.992	0.0724718		512.653	470.913	495.903	0.10545		541.98	472.619	503.944	0.148472		522.204	474.342	507.479
80		516.571	467.982	492.173	0.162206		515.245	467.73	487.347	0.270289		529.673	480.704	501.572	0.0712636		517.898	451.172	470.929	0.208736		497.531	470.579	491.441	0.0789878		515.551	457.295	485.619	0.148116		539.143	481.487	503.92	0.076686		513.796	470.538	495.696	0.110276		544.327	473.104	504.013	0.158635		530.367	474.541	507.933
82		513	468.195	492.078	0.139965		507.612	467.654	487.205	0.180156		535.408	481.408	501.306	0.133283		518.122	451.328	470.995	0.212679		498.265	470.663	491.402	0.0854722		514.837	457.651	485.364	0.149582		537.735	481.417	503.433	0.0760155		514.041	470.653	495.558	0.112502		537.714	472.678	504.038	0.132626		528.51	474.68	507.415
84		510.347	468.199	491.606	0.127319		513.571	468.115	486.929	0.268846		535.367	481.769	501.163	0.141693		512.755	451.125	471.002	0.151045		496	470.758	491.161	0.0698861		512.041	457.461	485.19	0.128861		541.286	481.174	503.278	0.0849673		513.898	470.87	494.764	0.118257		542.388	472.615	503.703	0.151873		528.347	475.229	507.168
86		510.653	467.463	491.132	0.131361		512.796	467.631	486.686	0.257928		533.714	481.241	501.081	0.121625		517.898	451.588	470.476	0.236535		495.388	470.625	490.828	0.0679805		514.714	457.255	484.92	0.152511		537.327	481.006	503.502	0.0729967		511.02	470.913	494.862	0.105883		541.143	471.703	503.408	0.145758		526.51	474.132	506.852
88		509.245	467.735	491.025	0.12424		508.837	467.256	486.435	0.20976		533.633	481.694	500.77	0.134786		518.224	450.795	470.649	0.212678		492.755	470.314	490.687	0.047332		518.061	457.26	484.539	0.185583		535.408	480.884	502.708	0.0727056		519	470.27	494.422	0.139537		542.367	471.874	503.211	0.152454		527.694	474.35	506.963
90		511.98	467.864	491.21	0.142254		510.224	467.273	486.193	0.23408		538.51	481.51	500.517	0.181424		515.327	450.687	470.101	0.198777		494.633	470.489	490.937	0.0605063		512.286	456.618	484.584	0.1337		540.592	480.87	502.18	0.0895705		516.837	470.057	494.204	0.131653		543.714	472.253	503.373	0.157735		526.265	473.492	505.892
92		511.245	467.118	490.665	0.139625		510.959	466.724	486.172	0.235126		533.959	481.02	500.362	0.137194		516.653	450.919	470.146	0.217388		490.367	470.559	491.009	0.0252373		512.265	456.968	484.852	0.132077		537.388	481.209	502.237	0.0823127		511.286	470.45	494.235	0.110024		543.163	471.423	502.648	0.157872		525.184	474.154	506.369
94		509.102	467.493	490.325	0.130967		507.327	466.955	485.947	0.19968		533.102	480.915	500.157	0.132996		520.306	451.49	470.182	0.272155		493.796	469.925	490.983	0.0526647		509.694	456.669	484.045	0.12202		542.102	480.841	502.215	0.0930974		517.571	470.457	493.726	0.140235		541.469	472.114	502.425	0.15681		528.673	473.744	505.595
96		513.612	466.761	490.159	0.161164		506.918	466.843	485.699	0.19958		535.592	480.378	500.084	0.148153		515.673	451.337	470.039	0.221811		490.184	470.765	490.439	0.0283017		512.653	456.557	484.105	0.143659		537.245	480.397	501.432	0.0840267		517.673	470.336	493.146	0.145192		547.612	471.478	502.044	0.179689		524.776	473.564	505.384
98		508.367	467.375	489.54	0.135498		503.959	467.218	485.45	0.173346		534.408	481.497	499.692	0.166073		512.878	450.923	470.243	0.173185		491.98	470.931	490.86	0.0397996		509.082	456.894	483.429	0.128518		536	480.217	501.399	0.0801993		515.286	469.802	494.578	0.121694		540	471.447	501.954	0.152184		521.449	474.147	505.638
100		502.367	466.474	489.304	0.088979		508.837	466.476	485.29	0.229656		533.939	481.303	499.633	0.159922		515.306	451.052	469.858	0.216937		492.592	470.59	490.304	0.0497514		508	457.168	483.805	0.115795		538.633	480.014	501.826	0.0831908		517.327	469.78	493.804	0.135759		536.163	472.407	501.567	0.145332		522.347	472.368	505.779
102		503.102	466.467	489.079	0.097029		510.531	467.027	485.056	0.268114		539.735	481.034	499.517	0.211325		511	451.62	470.209	0.170596		490.837	470.59	489.549	0.0417508		505.143	456.448	483.848	0.0872436		540.857	480.145	501.377	0.0927265		516.51	470.424	493.397	0.138404		538.224	471.205	501.497	0.148268		528.592	473.147	505.947
104		508.02	465.846	488.814	0.133284		502.714	466.954	484.816	0.170206		537.061	480.537	499.165	0.187413		506.959	451.657	469.927	0.135695		493.367	470.212	489.894	0.0597922		510.776	457.053	483.664	0.139854		540.571	480.07	501.608	0.089931		513.041	469.943	493.854	0.118419		537.816	471.394	501.622	0.146568		525.918	474.075	504.933
106		511.082	466.765	488.387	0.169097		503.939	466.954	484.574	0.193319		539.673	480.146	498.965	0.209161		505.245	451.237	469.678	0.115218		493.755	470.122	490.043	0.0614348		511.51	456.61	483.443	0.145768		541.857	479.652	501.26	0.0937987		515.041	469.726	492.625	0.135736		539.286	471.229	501.008	0.156504		520	472.177	504.759
108		509.776	466.162	488.22	0.156951		502.184	465.966	484.539	0.157823		536.755	479.799	498.765	0.182127		507.306	451.505	469.905	0.13689		496.776	470.129	489.478	0.093162		515.204	456.215	482.837	0.18274		534.735	478.261	501.397	0.0695236		518.551	469.828	492.931	0.148497		537.612	471.167	501.688	0.144272		517.449	472.951	504.702
110		506.347	466.43	488.022	0.135379		503.163	466.01	484.296	0.177295		540.041	480.922	498.736	0.235431		508.878	450.879	469.588	0.150939		495.02	469.947	489.526	0.0771072		513.327	456.163	483.238	0.159992		543.755	480.154	500.999	0.103354		516.469	469.949	493.35	0.136623		541.02	471.584	501.219	0.16301		517.469	472.673	504.156
112		506.224	466.037	487.753	0.135694		507.735	466.102	484.075	0.245105		533.367	479.357	498.459	0.15247		503.959	450.153	469.622	0.0808207		495.286	469.91	489.195	0.082965		511.673	455.992	482.621	0.155566		548.184	480.043	500.605	0.117924		517.327	470.143	492.935	0.144695		536.776	471.332	500.768	0.149491		516.959	471.865	503.25
114		505.02	465.081	487.379	0.125723		505.531	466.21	484.181	0.214519		536	480.153	498.262	0.195786		505.857	450.557	469.602	0.109998		495.408	469.641	488.259	0.0942935		507.02	456.327	481.618	0.136711		551.429	479.907	500.591	0.125903		516.469	469.789	492.115	0.146719		537.592	471.412	501.067	0.150439		515	473.09	503.433
116		503.878	466.518	486.963	0.131796		511.653	466.48	483.906	0.310822		530.898	480.752	498.122	0.162515		503.367	450.539	469.452	0.0869773		496.306	469.586	488.924	0.0939198		505.755	456.085	481.47	0.126321		550.857	478.98	499.683	0.126678		514.204	470.122	490.993	0.148808		538.082	471.412	500.273	0.159285		518.082	472.023	502.756
118		504.408	465.585	486.823	0.131906		504.143	466.217	483.555	0.214381		534.143	479.31	497.883	0.173554		497.694	450.655	469.449	0.026457		495.02	470.277	489.185	0.081761		508.592	456.056	481.888	0.143105		550.51	478.936	499.756	0.124789		518.429	470.231	490.875	0.170652		540.939	471.092	500.286	0.168594		520.102	472.895	502.509
120		508.02	464.875	486.615	0.158184		504.816	466.109	483.534	0.222457		530.816	480.395	497.795	0.164344		500.571	451.2	469.273	0.0741668		495.082	469.926	488.823	0.0855211		512.102	456.534	481.35	0.187835		548.449	480.043	499.929	0.124908		516.837	469.972	492.571	0.145044		544	471.619	499.835	0.188091		520.041	471.835	502.381
122		507.347	464.577	486.496	0.152593		507.857	465.695	483.486	0.257834		532.245	480.844	497.502	0.196078		498.408	451.226	469.141	0.053719		496.388	469.8	488.476	0.100887		504.163	456.888	481.567	0.117378		548.755	479.829	499.729	0.126223		517.796	469.156	491.168	0.158384		547.286	471.288	499.413	0.203544		519.959	472.827	502.386
124		507.367	465.29	486.408	0.159506		504.857	465.73	483.151	0.228322		529.898	479.755	497.632	0.14866		497.061	451.458	469.38	0.0351395		492.388	469.641	488.862	0.0609542		504.653	456.25	480.821	0.129207		547.469	480.394	499.43	0.129548		520.449	469.298	490.818	0.174791		542.878	471.147	499.164	0.187529		519.327	473.361	501.965
126		503.857	465.206	486.186	0.134303		505.204	465.305	483.105	0.227262		528.163	479.412	497.389	0.132948		501.796	450.699	469.12	0.0829405		495.163	469.535	488.166	0.0928926		506.143	456.133	480.917	0.139638		548.327	479.612	500.014	0.120925		523.857	469.252	490.923	0.188806		545	471.104	499.663	0.190601		516.653	472.91	502.026
128		503.102	464.272	486.057	0.124258		501.878	465.264	482.912	0.187517		526.939	479.793	497.33	0.128982		509.143	450.66	469.131	0.164727		496.367	469.214	487.815	0.106891		501.551	455.684	480.05	0.110155		548.673	480.206	499.917	0.126773		522.755	470.197	490.585	0.194513		539.143	470.071	498.996	0.168081		520.265	472.519	501.688
130		500.327	464.908	485.792	0.109754		504.082	466.001	482.749	0.234944		522.898	480.653	497.249	0.104852		504.878	450.865	468.524	0.142311		496.041	469.628	488.067	0.102352		498.633	455.967	479.915	0.0882061		547.02	479.997	499.3	0.126696		516.265	469.824	490.025	0.167141		547.204	470.584	498.983	0.203073		524.878	473.263	501.206
132		504.184	464.596	485.676	0.140295		502.694	465.708	482.515	0.217522		524.755	480.575	497.06	0.12757		506.51	450.892	468.315	0.170149		492.102	469.303	487.875	0.068295		495	456.115	480.415	0.0487097		548.49	478.759	499.184	0.123472		519.449	469.352	489.67	0.183499		544.51	470.125	498.471	0.194743		520.776	472.436	501.883
134		496.469	464.699	485.493	0.0815381		503.224	465.376	482.534	0.218765		526.694	479.721	496.652	0.143507		503.531	450.854	468.752	0.118238		493.327	469.441	487.685	0.0818695		497.612	455.895	480.165	0.0745462		551.51	479.18	499.337	0.133138		516.286	469.769	488.852	0.180749		545.755	470.663	498.326	0.204941		525.265	471.571	500.452
136		495.755	464.904	485.317	0.0787687		501.612	465.04	482.123	0.203278		528.143	481.432	496.765	0.189453		501.02	450.404	468.538	0.0865624		496.122	469.056	487.633	0.106426		495.184	455.516	480.131	0.0511769		551.367	479.722	498.988	0.140367		516.735	470.157	489.282	0.180536		545.102	470.108	498.25	0.199333		524.898	472.267	500.008
138		495.388	463.963	485.372	0.071469		502.776	464.993	482.042	0.221217		524.061	478.653	496.353	0.108218		499.816	450.949	468.558	0.0832052		491.612	469.379	487.651	0.066496		497.265	455.963	480.742	0.0632121		551.571	479.383	498.898	0.139279		517.694	469.396	488.115	0.194736		540.224	469.982	497.985	0.181672		525.469	472.647	500.274
140		495.653	464.349	485.065	0.0787287		503.959	464.911	482.054	0.235901		526.653	479.823	496.31	0.15466		495.265	450.249	468.83	0.00974299		493.122	469.398	487.719	0.0794847		497.163	455.89	480.305	0.0683641		550	480.33	497.831	0.154904		516.265	469.373	489.501	0.170158		544.265	471.267	497.829	0.208743		524.551	472.47	500.734
142		491.694	465.357	484.922	0.0510446		500.959	464.714	481.712	0.201246		526.959	478.918	495.961	0.151011		495.306	450.34	468.605	0.0179094		491.429	469.33	487.224	0.0695243		503.612	456.68	479.818	0.141928		548.102	478.959	498.387	0.131508		518	469.922	488.425	0.196525		539.286	471.064	498.589	0.178305		527.061	472.602	499.656
144		506.408	463.298	483.652	0.180573		496.98	465.088	481.769	0.148733		524.449	479.388	495.851	0.137212		491.102	450.737	468.839	-0.0304511		496.51	469.346	487.054	0.119233		499.735	455.969	479.779	0.100513		546.327	479.684	498.213	0.133601		516.347	469.296	488.788	0.178418		540.327	470.28	498.217	0.181553		524.776	472.376	499.412
146		507.327	463.886	483.34	0.199871		499.796	464.494	481.616	0.184447		523.592	480.204	495.702	0.147764		494.122	450.401	468.765	0.00101103		491.776	469.262	486.198	0.085212		501.102	455.695	479.133	0.122109		555.837	478.53	498.765	0.146007		514.714	468.938	488.673	0.169161		534.388	470.579	497.887	0.162288		523.388	472.425	499.28
148		503.98	464.404	483.11	0.180183		501.061	464.983	481.528	0.212749		523.531	479.068	495.595	0.129312		489.122	450.52	468.38	-0.0447293		496.265	468.902	486.733	0.119329		498.673	456.337	479.139	0.104551		556.265	479.855	498.511	0.161269		518.286	469.629	488.794	0.190682		538.265	470.282	497.607	0.179366		523.184	471.226	499.109
150		507.735	464.36	483.124	0.21306		499.122	464.671	481.374	0.18463		520.061	479.32	495.575	0.0982444		492.776	450.983	468.479	0.00266152		493.939	469.845	486.526	0.104337		493.755	456.254	479.515	0.0513175		550.673	478.528	498.449	0.13498		515.857	469.374	488.264	0.183016		539.327	470.256	497.343	0.186367		527.204	472.195	499.366
152		503.184	464.165	483.098	0.170989		500.714	464.718	481.305	0.210256		523.286	480.381	495.629	0.150167		494.551	451.291	468.329	0.0339939		494.592	468.758	486.301	0.109028		496.633	455.435	479.445	0.0738924		553.286	479.681	497.814	0.159243		520.122	469.485	488.467	0.20332		541.469	470.434	497.492	0.194868		529.041	471.071	499.362
154		510.061	464.015	483.091	0.230212		500.694	464.724	481.088	0.216923		520.612	479.391	495.322	0.111941		496.755	450.751	468.243	0.0529568		497.755	469.084	486.761	0.133853		496.224	455.696	479.282	0.0744235		547.939	478.754	497.886	0.134682		518.408	469.181	488.328	0.193838		537.673	470.06	497.368	0.178011		527.592	470.673	499.647
156		501.163	463.89	482.533	0.160653		496.388	464.19	481.08	0.147413		526.571	479.942	495.451	0.182721		497.633	450.214	467.951	0.0620136		495.327	468.832	486.036	0.120239		496.755	455.884	479.069	0.0841151		544.347	479.322	497.91	0.128142		518.878	469.499	487.821	0.206012		537.51	469.835	497.582	0.173842		530.143	470.733	498.801
158		507.184	464.298	482.455	0.221509		492.694	464.667	481.05	0.100816		523.837	479.935	495.447	0.152934		498.388	450.929	468.059	0.0822473		494.408	469.106	485.503	0.120744		501.286	455.443	478.902	0.125778		544.347	479.968	498.189	0.130083		516.653	468.885	487.069	0.199325		538.816	470.372	497.061	0.188007		530.122	471.263	499.336
160		504.245	463.813	482.482	0.188581		493.918	464.721	480.946	0.121963		528.592	478.854	495.142	0.190673		507.265	450.811	468.829	0.157847		492.612	469.366	485.727	0.100417		497.041	455.902	479.369	0.0819894		538.02	478.968	497.978	0.106416		513.143	469.159	487.542	0.176336		540.02	470.33	496.668	0.197205		526.939	470.929	498.999
162		501.612	463.574	482.368	0.164788		491.796	464.51	480.722	0.0942262		528.49	479.146	495.022	0.199865		508.653	450.37	468.233	0.184857		487.796	469.066	485.608	0.0524462		496.878	455.517	479.455	0.0764986		538.776	479.029	498.109	0.107804		516.224	469.438	488.617	0.180928		539.306	470.599	497.079	0.191413		521.02	472.289	498.609
164		507.163	464.033	482.374	0.219765		499.449	464.659	480.19	0.226909		525.959	479.02	494.751	0.178884		506.735	450.173	467.825	0.172664		490.02	469.577	485.962	0.0716308		494.061	455.72	478.913	0.0602322		536.143	479.475	497.634	0.107208		519.245	468.685	488.06	0.19762		533.98	470.051	497.199	0.164341		516.347	472.079	499.021
166		506.224	464.695	482.007	0.227701		496	463.484	479.952	0.16365		523.694	478.16	494.531	0.14469		509.449	450.714	467.927	0.216014		490.204	469.138	485.296	0.0809549		494.939	455.649	479.389	0.0606425		538.816	480.359	497.547	0.122753		515.735	469.402	489.115	0.172188		539.571	470.553	497.176	0.191158		524.49	471.861	498.845
168		507.082	463.14	481.705	0.222343		499.102	463.746	480.031	0.210481		524.102	478.554	494.437	0.159271		510.245	451.072	468.216	0.224202		489.143	468.517	485.197	0.0697863		501.571	455.924	479.069	0.129706		538.224	478.672	497.6	0.108627		517.184	469.059	487.937	0.191705		539.449	469.637	496.783	0.188822		521.102	472.09	498.61
170		504.735	463.077	481.761	0.1993		495.959	464.197	479.968	0.173049		518.163	477.973	494.279	0.0912137		506.98	450.949	468.232	0.18052		490.939	468.98	485.7	0.0825487		503.51	455.411	479.628	0.132743		541.959	479.362	497.032	0.1306		516.061	468.573	487.577	0.186757		538.837	469.738	497.074	0.183861		520.306	470.662	499.385
172		509.02	463.449	481.713	0.243856		501	464.004	479.709	0.254459		514.306	479.048	494.241	0.0668839		508.551	450.343	467.85	0.197794		491.02	468.833	485.345	0.0875947		505.959	456.057	478.738	0.179337		545.714	479.168	497.522	0.135209		517.653	469.057	487.021	0.207005		537.306	470.527	496.941	0.183906		522.531	472.981	498.492
174		505.755	462.901	481.679	0.208115		499.143	464.635	479.719	0.238269		514.49	479.136	494.096	0.0740718		506.224	450.397	467.713	0.176777		489.878	469.443	485.202	0.0797859		509.102	455.51	479.094	0.195061		542.388	478.841	497.468	0.123336		516.98	469.319	487.469	0.19923		537.449	469.808	496.584	0.183682		523.245	471.707	498.495
176		505.204	463.335	481.443	0.213157		497.673	464.273	479.979	0.19988		514.653	478.857	494.047	0.0729428		514.98	451.015	468.117	0.284376		489.755	468.85	485.035	0.0789395		504.551	455.401	478.295	0.167728		544.531	478.948	497.517	0.130006		518.49	469.016	487.061	0.210588		532.816	470.055	496.867	0.162755		522.102	471.771	499.041
178		505.184	462.79	481.257	0.210384		500.571	465.293	480.051	0.262737		516.694	478.925	493.79	0.10406		515	450.603	468.184	0.268257		490.122	469.051	485.249	0.0804709		504	456.069	478.251	0.170767		544.551	479.933	497.222	0.141409		516.224	468.914	487.49	0.191466		541.939	470.388	496.872	0.20349		517.816	471.391	498.438
180		507.939	463.29	481.249	0.242352		497.041	464.154	479.966	0.188755		519.571	479.276	493.489	0.153758		520.796	450.946	467.929	0.362071		487.388	468.656	485.018	0.0545374		500.102	455.648	478.159	0.130261		546.735	479.806	497.497	0.143943		517.286	468.71	486.853	0.204278		536.347	470.524	496.311	0.18666		518.286	472.154	498.595
182		504.49	463.401	481.239	0.211692		494.735	463.695	480.146	0.142763		514.939	479.105	493.469	0.0962755		509.653	450.567	467.632	0.22647		488.959	469.011	484.685	0.0757896		499.694	455.768	478.536	0.120359		546.408	480.125	497.186	0.149589		520.551	468.71	486.435	0.22855		536.265	469.685	496.092	0.183131		516.714	471.308	498.154
184		504.755	463.474	481.227	0.215357		494.429	464.799	480.058	0.155863		515.612	476.68	493.488	0.0661415		510.592	450.476	467.559	0.238278		488.898	468.981	484.934	0.0717662		499.612	455.791	477.967	0.130542		544.367	479.606	497.376	0.136246		517.429	468.64	486.977	0.202638		536.327	470.315	495.982	0.188838		518.571	471.038	498.353
186		505.959	463.463	481.235	0.226413		493.816	464.915	480.05	0.148178		516.531	478.483	493.255	0.109951		513.143	450.359	467.966	0.248033		488.286	468.39	485.137	0.061717		500.327	455.621	477.667	0.141819		546.98	479.171	496.825	0.147146		516.714	468.645	486.506	0.205641		535.939	470.027	495.767	0.187576		517.265	472.414	498.447
188		500.612	463.665	481.024	0.182317		494.714	464.461	479.911	0.15975		515	479.01	493.257	0.101585		515.959	450.682	467.711	0.303778		487.796	468.405	484.53	0.0641291		505.102	455.783	476.95	0.207603		546.694	478.794	496.91	0.141994		521.612	468.2	486.226	0.232309		534.816	470.346	495.857	0.183791		512.224	470.966	497.382
190		503.204	463.309	480.808	0.20773		493.061	464.32	480.058	0.128326		520.306	477.915	493.129	0.145523		518.449	451.357	468.109	0.339575		490.388	468.744	485.233	0.0824315		506.735	455.224	477.325	0.207759		541.388	478.939	496.858	0.127413		519.816	469.374	486.742	0.226545		536.449	469.8	495.924	0.186512		515	471.628	497.566
192		503.327	463.176	480.883	0.205662		492.98	464.744	480.442	0.121771		519.347	477.976	492.975	0.140783		513.959	450.803	467.99	0.270709		486.755	469.434	484.867	0.0507947		499.837	455.931	477.255	0.1486		542.571	479.606	496.382	0.142283		515.143	468.7	486.135	0.202942		531.245	469.405	495.378	0.167287		517.306	472.256	498.054
194		506.388	462.526	480.915	0.225415		495.122	464.645	480.059	0.164301		519.265	478.636	492.88	0.156676		514.592	450.652	467.443	0.298506		491.143	468.837	484.501	0.100951		503.102	455.434	477.005	0.181438		539.49	479.064	496.698	0.124175		516.673	468.635	485.964	0.213573		533.551	470.407	495.598	0.181473		512.694	471.85	497.782
196		503	462.669	480.648	0.201585		496.061	464.523	480.104	0.175475		514.857	478.568	492.824	0.104857		520.469	452.035	469.092	0.341047		491.265	468.715	484.34	0.104138		505.327	455.445	477.507	0.19258		537.673	478.875	496.645	0.117641		521.51	469.754	486.262	0.249203		532.898	469.833	495.394	0.177028		514.224	472.075	497.716
198		502.939	463.779	480.528	0.217497		492.347	464.523	480.129	0.118008		520.469	477.667	492.846	0.151181		521.163	450.928	467.984	0.363107		488.204	469.255	484.314	0.0734016		504.388	455.394	477.345	0.186261		541.184	479.472	496.446	0.135763		516.673	469.464	486.546	0.212744		534.571	470.161	495.823	0.181848		507.347	472.466	497.506
200		502.714	463.18	480.598	0.206031		496.816	464.422	478.795	0.23019		518.551	478.932	492.641	0.163033		518.082	450.687	467.932	0.319371		486.306	468.712	484.226	0.052746		503.939	455.117	477.569	0.173749		539.857	479.733	496.426	0.133881		518.408	468.765	486.24	0.220313		533.633	470.332	495.367	0.183944		504.959	471.628	497.704
202		502.245	463.184	480.392	0.206067		499.735	463.516	478.838	0.256406		516.388	478.565	492.66	0.128148		517.204	449.872	467.743	0.290101		487.163	468.923	484.337	0.0609366		502.061	455.113	477.83	0.150266		537.163	478.646	496.135	0.119698		515.959	468.289	485.694	0.21031		532.837	469.985	495.535	0.176207		520.184	471.91	497.568
204		503.796	461.938	480.215	0.209468		498.653	463.227	478.77	0.236245		519.245	479.207	492.694	0.176314		519.776	451.806	467.605	0.401516		488.939	468.367	484.141	0.0810248		497.306	455.463	477.399	0.115616		548.551	479.913	495.907	0.172123		516.367	469.115	487.104	0.199305		531.469	471.002	495.451	0.1777		532.592	472.162	497.789
206		496.531	462.871	480.213	0.150861		492.367	463.842	478.741	0.149372		525.327	478.381	492.569	0.233771		517.592	451.268	467.589	0.351812		487.388	468.73	484.18	0.0649761		495.469	455.224	477.454	0.0944725		546.082	479.426	495.458	0.164704		519.327	469.403	486.393	0.229893		531.49	470.727	495.41	0.176408		528.306	469.951	498.041
208		498.061	463.195	480.093	0.171396		493.898	463.072	478.594	0.16638		522.429	478.017	492.388	0.196876		519.653	451.572	467.691	0.385149		487.898	469.232	483.707	0.0785913		494	455.374	477.841	0.0746249		547.041	478.896	495.996	0.155135		521.98	469.515	485.964	0.254536		532.796	470.705	495.216	0.184473		527.939	472.32	497.246
210		498.02	464.371	479.905	0.188651		492.082	463.898	478.616	0.149461		520.898	479.139	492.339	0.209233		519.49	451.091	467.5	0.373629		485.347	468.625	483.928	0.0458723		499.245	455.314	477.336	0.134638		549.469	478.507	495.677	0.16333		521.898	469.278	485.23	0.265241		532.347	469.619	495.274	0.174525		528.531	470.628	497.775
212		499.061	463.151	479.902	0.184893		485.653	463.407	478.518	0.0439839		522.082	479.398	492.196	0.238222		508.122	451.281	467.716	0.225662		487.204	468.228	483.431	0.0717154		495.694	455.824	477.072	0.108847		548.02	479.099	495.749	0.16369		521.694	469.221	486.462	0.240204		534.959	469.853	494.943	0.191438		525.041	472.09	497.335
214		501.102	463.11	479.619	0.211329		490.122	464.126	478.408	0.126891		523.694	479.105	492.207	0.249708		509.796	450.845	467.685	0.234442		481.755	469.129	483.612	0.00914009		497.122	455.079	476.956	0.118727		545.551	478.716	496.372	0.144064		523.612	469.799	486.28	0.261954		538.429	470.595	494.871	0.213943		523.735	471.244	497.281
216		499.02	463.239	479.624	0.191607		492.408	463.376	478.394	0.1538		519.184	478.384	492.13	0.176229		511.163	451.222	467.858	0.255795		487.082	468.634	483.118	0.0759559		491.592	456.224	477.496	0.0623065		552.612	478.188	495.886	0.16734		523.51	469.339	485.883	0.262857		534.469	470.434	494.698	0.196427		522.959	471.526	497.324
218		500.122	462.702	479.309	0.20327		496.898	463.986	478.32	0.24026		520.592	478.776	492.088	0.205461		513.735	450.687	467.694	0.277492		485.714	468.162	483.501	0.0544418		493.224	456.015	477.601	0.0756098		551.653	478.133	495.694	0.166305		524.061	469.952	485.833	0.275888		536.551	470.02	494.083	0.210623		522.327	472.474	497.367
220		496.551	461.794	479.735	0.150247		494.429	464.56	478.482	0.204377		526.163	478.194	491.908	0.265683		511.694	451.296	467.521	0.280691		487.245	468.837	483.914	0.0671864		489.49	455.782	476.528	0.0540634		556	479.4	495.394	0.199723		525.592	470.149	486.378	0.276785		533.49	470.531	494.042	0.200801		522.408	471.12	496.882
222		498.265	462.221	479.565	0.173889		497.327	464.147	478.339	0.250231		518.408	478.371	491.735	0.180916		514.918	450.82	467.658	0.298246		484.633	468.605	483.475	0.0434032		491.98	456.117	476.945	0.075198		549.673	479.278	495.811	0.170258		527.633	469.491	485.533	0.297203		531.878	470.487	494.132	0.191603		524.061	471.519	496.808
224		497.898	463.419	479.464	0.185755		498.898	464.218	478.474	0.272797		517.959	478.422	491.807	0.173813		509.878	451.16	467.613	0.248654		486.592	468.194	483.633	0.0623195		490.224	456.366	476.904	0.0592363		547.041	479.006	495.645	0.16089		525.102	469.469	485.712	0.277644		533.041	470.736	494.281	0.19723		518.082	472.523	497.311
226		500.163	462.713	479.414	0.201443		499.367	464.307	478.446	0.283995		522.327	478.884	491.82	0.242122		505.163	451.795	467.505	0.212851		483.265	468.534	482.69	0.0372093		491.531	456.029	477.165	0.0660162		548.306	478.786	495.722	0.161776		525.367	469.01	485.678	0.273337		532.531	471.048	494.225	0.197969		515.429	472.372	496.833
228		499.796	462.511	479.318	0.197423		496.224	463.914	478.35	0.226461		519.163	478.007	491.701	0.182523		507.143	451.436	467.323	0.235651		485.122	468.165	482.858	0.0560734		490.531	456.383	477.267	0.056313		546.449	480.014	495.679	0.169323		529.408	469.814	486.259	0.297151		533.041	470.555	494.441	0.193821		520.286	471.703	496.574
230		500.306	463.21	479.379	0.21015		492.041	464.262	478.28	0.165359		519.653	478.112	491.494	0.199216		502.51	451.12	467.224	0.169923		485.878	467.962	482.917	0.0633729		489.571	455.992	477.471	0.0406833		547.714	478.861	495.229	0.167414		523.633	469.463	485.505	0.272906		530.388	470.438	493.816	0.187993		524.408	472.222	496.157
232		501.673	463.246	479.285	0.227196		492.633	464.118	478.128	0.178143		522.184	479.068	491.461	0.262516		502.122	450.478	466.993	0.156575		486.878	467.842	482.926	0.0740138		496.286	456.14	477.262	0.114129		545.204	479.487	495.358	0.163762		512.592	469.683	485.502	0.207723		530.878	470.33	494.182	0.185071		522.184	472.376	496.515
234		501.796	462.331	479.076	0.220648		494.612	463.435	478.032	0.202089		513.653	478.354	491.485	0.128956		501.408	450.702	467.26	0.143074		486.939	468.533	482.705	0.0801249		491.653	455.996	477.297	0.0647676		542.776	479.049	495.352	0.150912		514.694	469.484	485.318	0.22173		532.837	471.002	494.55	0.194939		526.163	472.594	495.758
236		501.837	462.577	479.259	0.220079		498.224	464.491	478.115	0.283121		515.796	478.061	491.192	0.160286		503.265	450.412	467.34	0.155559		487.633	467.941	483.089	0.080327		498.837	455.961	476.722	0.149955		543.143	479.18	494.982	0.158611		511.245	470.456	485.53	0.207077		531.02	470.529	493.569	0.19489		521.551	472.038	496.458
238		497.755	463.151	479.129	0.18858		490.653	463.678	478.098	0.138915		516.857	478.687	491.256	0.187832		500.02	451.269	467.388	0.135177		486.959	468.47	483.2	0.0728823		504.673	456.445	476.369	0.22733		542.796	481.487	495.887	0.170242		508.837	469.998	485.22	0.191924		531.204	470.654	493.605	0.196329		523.286	472.658	496.353
240		499.388	463.886	478.994	0.219483		489.633	463.805	478.124	0.122976		518.694	477.35	491.147	0.181035		501.531	450.944	467.41	0.145134		486.163	467.807	482.894	0.0664789		504.694	456.564	476.092	0.236925		536.286	478.588	494.531	0.134839		513.878	470.33	485.773	0.218264		531.816	470.396	493.775	0.195078		519.776	472.617	496.584
242		502.98	462.868	479.059	0.240886		489.673	464.22	478.133	0.129094		514.857	478.398	490.93	0.166288		504.633	450.966	467.486	0.181904		485.408	468.249	482.4	0.0657952		505.571	455.9	475.835	0.242799		544.49	479.174	494.64	0.168337		514.49	469.9	485.81	0.216568		528.653	470.244	493.595	0.180879		516.122	472.109	497.127
244		500.51	462.379	478.921	0.211968		488.633	463.849	478.012	0.110149		517.939	479.027	490.872	0.229759		505.061	451.215	468.009	0.173077		483.612	468.437	483.454	0.0322057		506.306	455.98	476.217	0.241751		538.327	478.858	494.311	0.147555		517.347	469.67	485.461	0.237824		531.429	470.568	493.622	0.196521		516.327	472.226	497.052
246		504.163	463.357	478.931	0.264834		485.102	463.705	477.903	0.052291		513.184	478.616	490.679	0.158916		503.286	451.859	468.607	0.144806		487.408	468.281	482.302	0.0909992		506.816	455.497	476.235	0.239096		537.694	478.328	493.889	0.145708		518.49	470.227	485.271	0.256358		530.837	470.573	493.708	0.192565		520.265	472.564	496.983
248		504.429	462.507	478.884	0.25471		477.388	464.293	478.419	-0.085887		516.939	477.194	490.653	0.17368		502.204	450.966	467.211	0.162199		487.286	468.033	482.445	0.0862998		507.265	456.056	476.321	0.25049		534.551	479.449	493.926	0.145215		523.959	470.185	484.765	0.303467		529.673	470.137	493.35	0.188037		521.592	473.305	497.057
250		503.122	463.805	479.112	0.256179		495.224	462.395	475.73	0.279755		513.469	477.279	490.645	0.132232		499.735	450.249	467.261	0.11109		489.041	467.778	482.42	0.105633		511.265	456.488	477.575	0.265883		541.959	479.58	493.932	0.175165		518.449	469.9	486.162	0.234505		528.429	470.104	493.506	0.179858		519.449	473.32	496.75
252		500.531	463.978	479.05	0.232126		499.265	463.155	476.217	0.351852		516.776	477.282	490.544	0.177892		499.51	450.746	467.179	0.123296		489.918	467.529	482.699	0.10957		511.816	455.757	475.964	0.304326		541.041	478.142	493.994	0.154181		518.592	470.515	485.911	0.247975		524.286	470.35	493.069	0.16651		519.469	473.075	496.446
254		504.531	463.654	479.02	0.271561		496.082	463.375	476.253	0.29831		514.469	478.051	490.483	0.169683		500.082	450.771	467.143	0.132565		488.082	468.071	482.011	0.10286		508.673	456.911	475.715	0.29964		540.776	479.212	494.047	0.164274		518.776	470.652	485.287	0.264224		527.592	470.544	492.884	0.18678		523.612	473.41	496.949
256		500.469	461.974	478.854	0.207842		499.939	462.97	476.523	0.343092		512.592	478.051	490.238	0.153618		503.755	450.369	466.993	0.174144		487.673	468.233	481.848	0.101584		502.327	456.713	476.91	0.192027		547	479.301	493.349	0.201376		522.306	470.569	485.575	0.279872		528.082	470.454	492.818	0.189397		521.041	472.88	496.868
258		501.673	462.618	478.755	0.231285		493.878	463.075	476.722	0.23098		513.755	478.34	490.329	0.173835		499.163	450.84	467.249	0.118598		487.755	468.058	482.097	0.0974584		505.673	456.479	476.051	0.247555		541.286	478.899	493.3	0.174376		521.776	469.803	485.892	0.258538		522.204	470.104	492.576	0.160234		520.041	473.026	496.554
260		503.878	462.173	478.918	0.243096		491.673	463.595	476.753	0.201627		512.082	477.398	490.129	0.135062		497.041	450.835	466.614	0.115141		486.51	468.384	482.79	0.0733864		504.204	456.196	476.432	0.216837		542.306	478.557	493.598	0.169177		522.082	470.36	485.119	0.285435		522.51	469.456	492.799	0.155082		517.449	473.316	496.529
262		506.306	463.809	478.783	0.301402		489.184	463.384	476.743	0.153356		512.857	477.16	490.008	0.144188		504.918	451.502	467.865	0.185203		484.184	468.093	481.701	0.0607914		507.02	456.019	475.853	0.260162		536.306	479.684	493.313	0.164529		520.959	470.137	484.733	0.283224		528.286	469.828	492.279	0.192443		516.49	473.639	496.157
264		507.143	463.176	478.733	0.299411		488.918	463.716	476.707	0.155423		512.918	477.095	490.025	0.142858		507.51	450.992	467.571	0.215339		486.286	467.888	481.626	0.0868492		504.857	456.374	475.826	0.242973		537.49	479.154	493.275	0.163233		520.694	470.103	485.518	0.263601		526.265	469.678	492.128	0.183049		518.143	473.177	497.728
266		505.878	464.059	478.641	0.306402		490.633	463.704	476.655	0.188617		511.306	477.755	490.125	0.133021		512.327	451.552	467.547	0.296762		485.367	468.084	481.738	0.0746428		508.082	455.521	475.994	0.259278		537.837	479	493.554	0.158327		525.041	470.189	484.678	0.313041		522.367	469.474	491.98	0.163815		516.694	473.068	497.066
268		507.633	462.816	478.474	0.305461		489.959	463.705	476.685	0.175122		507.224	477.959	490.122	0.0813054		517.163	451.194	467.563	0.344808		484.878	468.066	482.638	0.0560123		511.837	456.289	476.017	0.313353		532.714	478.693	493.341	0.13866		519.735	469.966	485.872	0.248588		527.449	469.7	491.792	0.193597		517.204	473.222	496.834
270		505.388	464.445	480.36	0.256858		484.204	464.037	477.277	0.056137		509.286	478.327	489.984	0.123486		512.429	451.202	467.521	0.28681		484.367	468.274	482.082	0.0579681		508.286	456.402	475.82	0.282057		534.02	479.6	493.671	0.148617		516.49	469.855	485.824	0.228118		525.02	469.595	491.498	0.184166		515.184	473.929	496.983
272		507.714	466.511	481.555	0.284752		493.082	463.226	476.258	0.239044		512.143	477.235	490.074	0.134138		513.347	452.116	467.425	0.338462		487.408	468.106	482.038	0.0945363		512.714	456.457	476.497	0.311511		528.184	479.342	493.588	0.124274		518.082	470.156	484.085	0.279184		524.98	469.491	491.02	0.189464		518.776	474.342	497.244
274		507.102	465.298	481.278	0.264143		490.551	463.306	476.216	0.196021		515.776	477.241	490.02	0.184227		506.98	451.197	467.802	0.205		484.735	467.883	482.128	0.0608821		513.327	456.572	476.134	0.331989		528.551	479.522	493.247	0.132245		514.245	469.864	484.86	0.231963		527.939	469.984	491.149	0.207618		515.735	473.831	497.12
276		498.347	466.776	481.552	0.183699		488.959	463.205	476.196	0.165545		514.082	477.463	489.931	0.170977		510.714	450.7	467.763	0.237891		485.408	467.508	482.498	0.0627304		512.612	456.05	476.574	0.300333		532.939	479.299	493.415	0.14487		510.224	469.516	485.517	0.191197		524.449	470.24	491.362	0.188229		517.184	473.395	496.9
278		500.327	464.438	480.131	0.208921		493.245	463.076	476.256	0.238573		516.082	478.088	489.684	0.228302		510.551	450.662	467.698	0.237524		489.102	468.225	481.939	0.117291		514.612	456.214	476.037	0.341717		532.612	479.284	493.116	0.147945		515.755	470.357	484.866	0.248589		525.265	470.504	490.901	0.201581		515.531	473.977	497.295
280		496.408	464.213	478.43	0.205162		493.98	462.668	476.06	0.250273		519.265	477.986	489.656	0.272333		510.571	450.327	467.809	0.223062		484.755	468.218	481.801	0.0666121		508.898	456.873	475.5	0.308409		536.796	478.774	492.625	0.166441		514.878	469.885	484.522	0.243189		527.918	469.403	490.898	0.205814		516.306	473.199	496.787
282		498.735	463.059	478.278	0.218525		491.694	462.958	476.285	0.206943		517.061	477.605	489.579	0.231455		512.163	451.446	467.243	0.305924		490.102	467.595	481.891	0.125943		510.816	455.934	475.308	0.31707		529.224	479.968	493.166	0.141107		518.265	470.372	484.622	0.271351		527.245	469.134	490.873	0.200267		510.878	473.793	496.326
284		499.796	462.699	478.102	0.229307		492.143	462.79	476.093	0.218919		518.694	478.721	489.579	0.296693		513.082	452.118	467.216	0.346427		486	467.93	481.702	0.0823401		510.837	455.943	475.391	0.314857		526.653	479.067	492.948	0.124256		513.245	470.036	483.275	0.261818		529.51	469.736	491.137	0.213804		517.02	473.09	496.91
286		495.449	463.879	477.949	0.201678		496.592	463.325	476.133	0.312033		518.102	478.537	489.536	0.282458		513.612	450.929	467.799	0.279257		488.51	467.945	482.047	0.106649		507.49	456.58	475.451	0.287682		537.551	478.284	493.482	0.150398		519.49	469.601	484.188	0.277159		527.143	470.273	490.491	0.216038		516.98	473.425	496.755
288		492.122	461.426	477.822	0.139318		496.429	463.21	476.206	0.302202		515.347	477.371	489.521	0.202822		514.449	451.306	467.569	0.314061		490.735	467.431	481.742	0.134927		507.224	456.515	475.834	0.271796		535.755	479.441	493.091	0.162924		518.102	469.855	484.17	0.27228		527.551	468.899	490.193	0.20944		516.224	473.402	496.838
290		496.122	463.018	477.968	0.196734		495.061	463.19	476.167	0.278348		517.122	478.126	489.389	0.259687		511.306	451.805	467.598	0.290077		488.837	467.24	481.603	0.114189		507.082	456.056	475.517	0.271172		529.857	478.49	493.29	0.126618		517.612	470.028	483.674	0.283726		527.51	469.725	490.637	0.21044		515.49	473.744	496.274
292		495.878	463.654	477.891	0.20497		495.714	463.346	476.029	0.301245		517.286	477.969	489.281	0.261946		508.347	451.571	467.32	0.256204		489.612	467.69	481.836	0.121843		502.143	456.271	474.932	0.235512		533.939	478.328	492.641	0.149605		514.286	470.274	484.822	0.238417		523.082	469.584	490.587	0.18605		515.49	474.444	496.221
294		499.122	462.724	477.662	0.234036		497.918	463.089	475.96	0.337915		515.959	478.745	489.305	0.270114		510.571	451.214	467.982	0.242622		489.98	467.465	481.578	0.129431		491.449	456.459	475.325	0.104111		533.837	478.8	493.12	0.147277		518.776	469.488	483.168	0.295099		525.694	469.978	490.369	0.206956		511.98	473.128	496.432
296		497.469	463.39	477.878	0.219876		496.224	463.527	476.104	0.312601		515.673	477.697	489.141	0.235386		510.082	451.04	467.48	0.25335		487.061	467.616	481.307	0.100327		501.918	456.11	474.924	0.230418		533.102	479.093	492.927	0.150643		515.776	470.039	483.864	0.266186		524.102	469.789	490.079	0.200687		514.449	473.278	495.577
298		497.98	462.735	477.902	0.215105		495.735	463.417	476.032	0.303578		513.306	477.551	489.125	0.196684		508.755	451.14	466.932	0.265232		486.49	467.729	481.595	0.0891462		504.429	456.208	474.548	0.272766		534.02	478.875	492.673	0.155773		516.388	469.533	483.617	0.268006		527.51	468.98	490.423	0.206638		509.143	474.718	496.266
300		496.898	464.798	479.482	0.191991		496.102	463.966	476.188	0.319655		515	477.446	489.117	0.21838		510.143	451.352	467.581	0.259859		488.592	467.27	481.605	0.111488		502.796	456.133	474.484	0.253938		536.755	478.467	492.796	0.159723		523.633	469.724	484.283	0.304899		528.469	468.791	490.168	0.213651		513.449	473.654	495.818
302		500.02	465.996	481.145	0.202043		486.286	463.625	476.057	0.127512		512.061	478.02	489.143	0.191814		511.714	451.525	467.102	0.310174		488.184	467.825	481.502	0.111679		501.245	456.592	474.582	0.240721		531.02	478.904	492.596	0.145223		526.408	469.378	482.951	0.353859		526.429	469.013	489.813	0.210117		507.122	473.609	496.207
304		495.082	464.324	478.938	0.178338		482.184	462.943	476.015	0.0439249		513.878	477.109	489.03	0.195862		512.551	450.653	467.257	0.28181		487.347	467.562	481.782	0.0955183		499.959	456.55	475.053	0.2111		531.571	479.139	492.412	0.153205		522.102	469.78	482.595	0.342196		527.245	470.167	490.22	0.219821		508.347	473.575	495.579
306		493.898	463.507	478.031	0.176287		477.469	463.766	475.879	-0.0372293		513.51	477.959	488.961	0.220677		509.776	451.593	466.979	0.292995		489.633	467.475	480.778	0.141119		502.98	456.069	474.946	0.241371		529.531	478.496	492.402	0.137665		525.98	469.732	483.546	0.34111		522.449	469.577	490.375	0.185486		510.551	473.353	496.774
308		494.204	463.875	478.066	0.183793		476.837	463.214	475.84	-0.0496885		513.367	477.197	489.027	0.191318		511	451.234	466.874	0.301292		486.98	467.375	481.234	0.0993842		505.857	456.131	474.629	0.28559		534	478.47	492.441	0.154557		520.429	469.418	483.495	0.297139		522.286	469.419	490.47	0.182011		509.857	474.383	495.848
310		493.857	462.952	478.214	0.164959		492.245	464.032	476.732	0.222492		511.531	477.85	488.802	0.194332		505.653	451.771	466.872	0.248503		486.755	467.455	481.369	0.0948104		507.816	456.292	474.794	0.306622		529.469	479.012	492.078	0.148294		517.612	470.117	483.344	0.293906		524.245	468.81	490.192	0.191179		508.429	474.421	495.654
312		494.367	463.949	478.006	0.188274		499.673	464.157	477.113	0.346318		511.163	478.415	488.737	0.210767		508.694	451.429	466.436	0.300151		492.939	468.277	481.066	0.184799		505.469	455.968	475.272	0.258615		522.122	478.846	491.91	0.117851		517.265	469.283	482.328	0.302485		522.49	468.971	489.858	0.18776		510.143	474.011	495.809
314		494.796	463.728	477.973	0.191139		494.02	463.776	477.116	0.233372		509.571	477.616	488.731	0.160491		507.184	451.052	466.9	0.243039		492.469	467.578	480.6	0.181986		506.061	456.574	474.677	0.295486		520.204	478.632	492.158	0.104593		516.816	469.763	482.891	0.293259		523.918	469.35	489.634	0.202195		508.776	473.549	495.888
316		491.531	463.213	477.852	0.149765		487.878	464.974	477.29	0.136302		507.143	478.585	488.722	0.150739		506.755	451.03	466.388	0.261071		488.122	466.914	481.069	0.113293		509.041	455.962	475.149	0.302621		520.673	478.606	492.223	0.10547		516.347	470.042	482.716	0.300066		529.306	469.474	489.337	0.238544		510.898	474.049	495.357
318		494.592	462.68	477.819	0.178882		489.327	464.159	476.995	0.160372		508.714	477.571	488.686	0.148153		503.531	451.241	466.789	0.205776		490.102	467.795	480.81	0.14915		507.061	456.453	475.005	0.294238		518.224	477.945	491.953	0.093612		515.184	469.903	482.71	0.288497		520.265	469.722	489.354	0.189138		508.02	474.237	494.861
320		493.898	463.827	477.753	0.187509		488.837	464.477	477.023	0.155827		506.408	478.837	488.599	0.151941		498.163	451.091	466.968	0.122743		488.449	467.488	481.129	0.119669		499.571	456.801	474.335	0.231394		518.673	478.797	491.74	0.105004		520.49	469.902	482.825	0.325681		523.122	469.207	489.616	0.196724		509.02	473.801	495.49
322		492.061	463.835	477.501	0.171747		482.449	465.273	477.655	0.0237353		505.571	477.901	488.6	0.111731		498.918	451.276	466.566	0.15424		488.898	467.884	480.735	0.136059		505.143	456.468	475.033	0.271152		522.429	478.89	491.473	0.12603		517.612	469.776	483.192	0.291436		529.612	469.211	489.513	0.234355		510.429	473.323	494.858
324		493.531	462.941	477.344	0.181555		497.735	462.98	475.397	0.360065		505.633	476.932	488.476	0.0948429		499.898	452	466.257	0.205042		490.571	466.97	480.38	0.156799		507.816	456.387	474.669	0.312787		526.061	479.423	490.995	0.157639		519.061	469.961	482.447	0.327431		525.469	469.015	489.128	0.215361		509.551	473.857	495.281
326		493.102	464.313	477.366	0.195262		487.592	461.937	474.891	0.165073		506.857	477.789	488.458	0.135088		500.306	451.875	466.442	0.197766		487.082	467.938	480.738	0.112854		504.633	455.883	475.006	0.255349		523.898	477.736	491.513	0.11996		521.061	469.601	481.812	0.355086		523.061	469.467	488.847	0.210686		512.082	473.207	495.098
328		492.959	463.026	477.516	0.171806		478.796	462.378	473.812	0.0353412		506.122	477.163	488.429	0.109071		492.98	451.118	466.652	0.0664768		489.98	467.772	480.787	0.147885		502.286	455.646	474.789	0.230771		526.816	478.713	491.265	0.146664		522.041	469.389	482.621	0.332017		521.898	468.606	488.457	0.201563		511.122	474	495.206
330		493.735	464.379	477.298	0.206466		492.939	463.447	475.12	0.295155		508.898	477.912	488.394	0.174199		491.408	450.67	466.722	0.0337535		488.163	467.681	480.828	0.123211		503.959	456.337	474.822	0.26122		533.388	478.588	491.207	0.17496		520.184	469.467	482.12	0.334878		519.429	468.61	488.483	0.187182		506.694	473.85	495.696
		516.204					516.204					516.204					516.204					516.204					516.204
[truncated: 33 more columns]
