# Supplementary material for: A FRET-based study reveals site-specific regulation of spindle position checkpoint proteins at yeast centrosomes
Source: eLife. 2016 May 9;5:e14029. doi: 10.7554/eLife.14029 (PMC4878874; doi:10.7554/eLife.14029)
Supplement: Figure 4—source data 4. — FRAP curves for individual cells are also presented (source data for Figure 4F). DOI: http://dx.doi.org/10.7554/eLife.14029.032 [file elife-14029-fig4-data4.xls]

## Sheet: Description
Description
FRAP of Bfa1-GFP at the SPBs
FRAP data is corrected for acquisition bleaching and normalized to 0-1 (first point after bleach- before cleach)
Individual and average FRAP curves are shown in sheets "Figure 4E data & Figure 4F data"
raw data and correctes&normalized data series for individual cells are shown in sheets "Figure 4E raw data & Figure 4F raw data"
graphss of individual and average FRAP curves are shown for each experiment
Experiment1 correspons to the data shown in the figures
Data of the experiment repititions are shown as Experiment 2 in each sheet
Note that 2 biological replicates are performed for all data set except for the kar9∆ and kar9∆ kin4∆ cells with misaligned spindle. For e kar9∆ and kar9∆ kin4∆ cells with misaligned spindles, only one experiment is done as t-half of their FRAP recovery curves are a within the expected range (Caydasi et.al 2009)
FRAP cell #:	Corrected and normalized FRAP curves for the indicated individual cell (ie cell1, cell2...)
FRAP average:	Average of the indicated individual FRAP curves
stdev	Standard deviation of the avarage FRAP curve
Frap ROI mean	Mean Fluorescence intensity of the SPB bleached (0.809 µm2 area size is used for all measurements)
background mean	Mean Fluorescence intensity background area (Area free of cells)
ref mean	Mean Fluorescence intensityof the reference area (Area with unbleached cells)
normalized 0-1	Corrected and normalized FRAP data
time	in seconds
FI	Fluorencence intensity
AU	arbitrary units

## Sheet: Figure 4F
FRAP of Bfa1-GFP at the SPBs of W303 kar9∆ cells with misaligned spindles																								FRAP of Bfa1-GFP at the SPBs of W303 spc72∆ cells with misaligned spindles (Experiment 1)
time	FRAP cell1	time	FRAP cell2	time	FRAP cell3	time	FRAP cell4	time	FRAP cell5	time	FRAP cell6		time	FRAP average	stdev									time	FRAP cell1	time	FRAP cell2	time	FRAP cell3	time	FRAP cell4	time	FRAP cell5	time	FRAP cell6	time	FRAP cell7	time	FRAP cell8	time	FRAP cell9	time	FRAP cell10	time	FRAP cell11	time	time	FRAP average	stdev
0	0.978984	0	0.935423	0	0.89575	0	0.967809	0	1.03611	0	1.04928		0	0.977225	0.0585426									0	0.990415	0	1.01645	0	1.00371	0	0.963951	0	0.983535	0	0.945996	0	0.978244	0	0.99815	0	0.971061	0	1.01755	0	0.975018		0	0.985826	0.022136
2	0.970914	2	1.04635	2	1.04625	2	0.970713	2	0.983773	2	1.03191		2	1.00832	0.0370341									2	0.945157	2	0.996301	2	0.967991	2	1.00066	2	0.983903	2	1.03279	2	0.994371	2	0.978409	2	1.02317	2	0.990288	2	1.00302		2	0.992369	0.0242454
4	1.0501	4	1.01823	4	1.058	4	1.06148	4	0.980122	4	0.918808		4	1.01446	0.0560703									4	1.06443	4	0.987244	4	1.02829	4	1.03539	4	1.03256	4	1.02121	4	1.02738	4	1.02344	4	1.00577	4	0.992162	4	1.02196		4	1.0218	0.0212687
6	0	6	0	6	0	6	0	6	0	6	0		6	0	0									6	0	6	0	6	0	6	0	6	0	6	0	6	0	6	0	6	0	6	0	6	0		6	0	0
8	0.0804528	8	0.00119459	8	0.127717	8	0.0930843	8	0.125817	8	0.135734		8	0.0940001	0.0503749									8	-0.000190883	8	0.0198998	8	0.0129045	8	0.0221115	8	0.030548	8	-0.00168455	8	0.00726911	8	-0.0205016	8	0.014343	8	0.0217732	8	0.0438503		8	0.0136657	0.0173466
10	0.102459	10	0.152905	10	0.206436	10	0.162241	10	0.145134	10	0.203886		10	0.162177	0.0390926									10	0.000879945	10	0.0284596	10	0.0396426	10	0.0490701	10	0.0225377	10	0.0252298	10	0.00751725	10	0.0423893	10	0.0229656	10	0.0528274	10	0.0413559		10	0.0302614	0.0165626
12	0.244953	12	0.179071	12	0.199713	12	0.24793	12	0.198982	12	0.191141		12	0.210298	0.0289805									12	0.00683539	12	0.0344664	12	0.0503544	12	0.104766	12	0.0621418	12	0.0614486	12	0.0160227	12	0.0332263	12	0.0216288	12	0.0734873	12	0.0738173		12	0.0489268	0.0295455
14	0.187335	14	0.306672	14	0.306892	14	0.26012	14	0.308446	14	0.267849		14	0.272886	0.0470526									14	0.0263082	14	0.0306815	14	0.0737694	14	0.125283	14	0.0515322	14	0.0869985	14	0.0179241	14	-0.0379278	14	0.0282025	14	0.0851146	14	0.0820355		14	0.051811	0.0447177
16	0.297504	16	0.283015	16	0.384675	16	0.285609	16	0.473209	16	0.282685		16	0.334449	0.0785522									16	0.0325406	16	0.0564255	16	0.0920469	16	0.155792	16	0.0943847	16	0.0777867	16	0.0182124	16	0.0124932	16	0.0252451	16	0.095112	16	0.0913724		16	0.0683101	0.0437459
18	0.343311	18	0.404928	18	0.449373	18	0.320411	18	0.457662	18	0.429677		18	0.400894	0.05694									18	0.0289456	18	0.0853891	18	0.0623308	18	0.140719	18	0.0816916	18	0.114172	18	0.0146027	18	0.020445	18	0.0250456	18	0.107106	18	0.06861		18	0.0680961	0.0423728
20	0.340886	20	0.447119	20	0.492823	20	0.391904	20	0.469022	20	0.509872		20	0.441938	0.0643113									20	0.0303126	20	0.091213	20	0.0887193	20	0.171696	20	0.0898648	20	0.111261	20	0.0162634	20	0.0285954	20	0.0515451	20	0.11842	20	0.104122		20	0.0820011	0.0465636
22	0.3512	22	0.490756	22	0.472346	22	0.452283	22	0.437878	22	0.65487		22	0.476555	0.0998145									22	0.0458707	22	0.0842852	22	0.150317	22	0.214489	22	0.0957538	22	0.160901	22	0.0139748	22	0.0420565	22	0.0382356	22	0.113184	22	0.147433		22	0.100591	0.0628775
24	0.431823	24	0.404847	24	0.500741	24	0.44597	24	0.400136	24	0.661334		24	0.474142	0.0986018									24	0.0729122	24	0.0864493	24	0.159301	24	0.214303	24	0.107726	24	0.15966	24	0.0131039	24	0.0411869	24	0.0420679	24	0.100255	24	0.160991		24	0.105269	0.0623689
26	0.566782	26	0.495006	26	0.533143	26	0.467723	26	0.418759	26	0.849075		26	0.555081	0.152889									26	0.0645416	26	0.100644	26	0.149734	26	0.228378	26	0.127141	26	0.172735	26	0.0158401	26	0.0545637	26	0.0494081	26	0.120507	26	0.149711		26	0.112109	0.0626297
28	0.469339	28	0.550065	28	0.438518	28	0.522966	28	0.376961	28	0.808052		28	0.52765	0.150467									28	0.082883	28	0.0928407	28	0.15901	28	0.270666	28	0.121433	28	0.196854	28	0.0239037	28	0.0432762	28	0.0440644	28	0.1432	28	0.166249		28	0.122216	0.0746701
30	0.527109	30	0.56853	30	0.461039	30	0.619953	30	0.32676	30	0.84294		30	0.557722	0.172608									30	0.103437	30	0.11652	30	0.157387	30	0.29542	30	0.136094	30	0.273475	30	0.0197953	30	0.0131072	30	0.0637108	30	0.176643	30	0.158681		30	0.137661	0.0906526
32	0.618404	32	0.479145	32	0.603446	32	0.607718	32	0.514171	32	0.786144		32	0.601505	0.106788									32	0.119346	32	0.131493	32	0.208803	32	0.26068	32	0.144952	32	0.300054	32	0.0345786	32	0.03909	32	0.0403911	32	0.159425	32	0.189398		32	0.148019	0.0887506
34	0.716571	34	0.589053	34	0.688474	34	0.602916	34	0.586085	34	0.980334		34	0.693905	0.150654									34	0.110576	34	0.138872	34	0.221654	34	0.300468	34	0.139515	34	0.312664	34	0.0362169	34	0.0678083	34	0.0456207	34	0.204031	34	0.185576		34	0.160273	0.0946805
36	0.840382	36	0.503817	36	0.752805	36	0.573817	36	0.642814	36	0.870516		36	0.697358	0.14779									36	0.13046	36	0.151972	36	0.252048	36	0.321178	36	0.152039	36	0.33197	36	0.0301701	36	0.0952852	36	0.05514	36	0.176229	36	0.187443		36	0.171267	0.0983283
38	0.762775	38	0.425835	38	0.779062	38	0.577191	38	0.900471	38	0.917999		38	0.727222	0.19168									38	0.133517	38	0.136834	38	0.298737	38	0.362375	38	0.154181	38	0.35416	38	0.0405789	38	0.0523632	38	0.0626055	38	0.173334	38	0.202401		38	0.17919	0.115079
40	0.764428	40	0.432026	40	0.895129	40	0.592259	40	0.922907	40	0.764165		40	0.728486	0.186858									40	0.117767	40	0.118121	40	0.287021	40	0.400208	40	0.1706	40	0.350596	40	0.0392208	40	0.0618038	40	0.0574737	40	0.182638	40	0.240179		40	0.184148	0.122098
42	0.806559	42	0.488715	42	0.844689	42	0.551286	42	0.943566	42	0.836239		42	0.745176	0.181487									42	0.15029	42	0.134574	42	0.351531	42	0.435953	42	0.165074	42	0.358612	42	0.0441119	42	0.0584357	42	0.0703219	42	0.185373	42	0.232035		42	0.198756	0.131964
44	1.05303	44	0.619405	44	0.897111	44	0.644173	44	0.967287	44	0.782292		44	0.827215	0.175615									44	0.107213	44	0.155996	44	0.351523	44	0.388284	44	0.196638	44	0.359642	44	0.0442289	44	0.0517512	44	0.072153	44	0.237929	44	0.241862		44	0.200656	0.126581
46	1.04907	46	0.686212	46	0.889431	46	0.639512	46	0.806888	46	0.625864		46	0.78283	0.165735									46	0.124382	46	0.161851	46	0.31261	46	0.417736	46	0.195685	46	0.390167	46	0.0498405	46	0.0883577	46	0.0581793	46	0.21404	46	0.233157		46	0.204182	0.126362
48	0.973524	48	0.66126	48	0.90005	48	0.636695	48	0.806888	48	0.635898		48	0.769053	0.146471									48	0.140762	48	0.156404	48	0.305347	48	0.373708	48	0.208963	48	0.369918	48	0.055072	48	0.0579046	48	0.0790412	48	0.226751	48	0.294559		48	0.206221	0.118614
50	0.953337	50	0.721218	50	0.825031	50	0.629483	50	0.806888	50	0.718446		50	0.775734	0.111881									50	0.168992	50	0.178826	50	0.319504	50	0.400876	50	0.21844	50	0.412869	50	0.0476723	50	0.0535573	50	0.0500928	50	0.196271	50	0.314146		50	0.214659	0.133976
52	0.843099	52	0.725084	52	0.816383	52	0.614155	52	0.806888	52	0.620695		52	0.737717	0.101193									52	0.168753	52	0.191688	52	0.375927	52	0.396431	52	0.230822	52	0.432563	52	0.0621376	52	0.068297	52	0.067868	52	0.300673	52	0.318194		52	0.237578	0.137113
54	0.86221	54	0.823023	54	0.799841	54	0.613968	54	0.806888	54	0.594843		54	0.750129	0.115084									54	0.167536	54	0.208112	54	0.368141	54	0.405494	54	0.232456	54	0.459777	54	0.0633813	54	0.0943505	54	0.06862	54	0.298311	54	0.289437		54	0.24142	0.136395
56	0.87899	56	0.837438	56	0.946794	56	0.54728	56	0.806888	56	0.642154		56	0.776591	0.151481									56	0.192761	56	0.205334	56	0.327786	56	0.379561	56	0.212445	56	0.465331	56	0.0880667	56	0.150238	56	0.0925564	56	0.270592	56	0.313218		56	0.245263	0.118753
58	0.771583	58	0.769201	58	0.99926	58	0.666414	58	0.806888	58	0.679395		58	0.782124	0.119985									58	0.188718	58	0.236118	58	0.404631	58	0.396823	58	0.19467	58	0.47231	58	0.0787067	58	0.0822876	58	0.0878348	58	0.258528	58	0.367116		58	0.251613	0.141218
60	0.847414	60	0.794831	60	0.993281	60	0.677382	60	0.806888	60	0.653326		60	0.79552	0.123376									60	0.159835	60	0.276416	60	0.378731	60	0.436143	60	0.232886	60	0.452582	60	0.0850113	60	0.0799163	60	0.0901516	60	0.279672	60	0.353143		60	0.256772	0.139318
62	0.847414	62	0.837437	62	1.02606	62	0.655351	62	0.806888	62	0.819686		62	0.832139	0.118247									62	0.193631	62	0.266974	62	0.386913	62	0.466667	62	0.225273	62	0.512838	62	0.079413	62	0.15252	62	0.101189	62	0.233178	62	0.354855		62	0.270314	0.143644
64	0.759784	64	0.910246	64	1.04873	64	0.743301	64	0.806888	64	0.781481		64	0.841738	0.117295									64	0.198334	64	0.260084	64	0.416313	64	0.46003	64	0.246744	64	0.528269	64	0.087765	64	0.118552	64	0.102383	64	0.181366	64	0.382672		64	0.271137	0.153224
66	0.780101	66	0.890107	66	1.08208	66	0.676372	66	0.806888	66	0.873277		66	0.85147	0.1363									66	0.283918	66	0.291821	66	0.448691	66	0.485762	66	0.259932	66	0.570663	66	0.0927778	66	0.126513	66	0.110711	66	0.229176	66	0.402614		66	0.300234	0.160069
68	0.780101	68	0.850249	68	1.11064	68	0.728539	68	0.806888	68	0.722739		68	0.833192	0.144173									68	0.273642	68	0.293574	68	0.508429	68	0.510238	68	0.279126	68	0.529805	68	0.0878204	68	0.0785375	68	0.0988561	68	0.255637	68	0.384903		68	0.300052	0.168916
70	0.780101	70	0.979636	70	1.13218	70	0.825621	70	0.806888	70	0.814285		70	0.889785	0.138237									70	0.283188	70	0.310639	70	0.475703	70	0.464271	70	0.275663	70	0.599084	70	0.102046	70	0.0900802	70	0.101977	70	0.29008	70	0.397714		70	0.308222	0.167232
72	0.780101	72	1.0356	72	1.11862	72	0.825621	72	0.806888	72	0.817616		72	0.897408	0.142482									72	0.26422	72	0.291579	72	0.492382	72	0.444481	72	0.305698	72	0.568112	72	0.082844	72	0.0860842	72	0.0997889	72	0.260504	72	0.380005		72	0.297791	0.164943
74	0.780101	74	1.09957	74	1.13701	74	0.825621	74	0.806888	74	0.931206		74	0.930067	0.155004									74	0.307415	74	0.321365	74	0.484814	74	0.48702	74	0.273485	74	0.533877	74	0.0963243	74	0.147338	74	0.120375	74	0.267075	74	0.36309		74	0.309289	0.150405
76	0.780101	76	1.05017	76	1.00068	76	0.825621	76	0.806888	76	0.969504		76	0.905493	0.114816									76	0.313615	76	0.330647	76	0.455337	76	0.457601	76	0.283381	76	0.590112	76	0.0982896	76	0.158315	76	0.124096	76	0.278205	76	0.362293		76	0.313808	0.151161
78	0.804396	78	1.1538	78	0.852596	78	0.825621	78	0.806888	78	1.0629		78	0.9177	0.151433									78	0.341046	78	0.28996	78	0.459465	78	0.524412	78	0.331978	78	0.506169	78	0.119079	78	0.187865	78	0.122827	78	0.233231	78	0.40873		78	0.320433	0.144737
80	0.893464	80	1.18075	80	0.817142	80	0.808297	80	0.806888	80	0.952148		80	0.909781	0.144881									80	0.324854	80	0.324069	80	0.486956	80	0.508032	80	0.358842	80	0.578556	80	0.114083	80	0.258844	80	0.121853	80	0.260318	80	0.388315		80	0.338611	0.148813
82	0.938039	82	1.13594	82	0.726391	82	0.864383	82	0.806888	82	0.928759		82	0.900066	0.140013									82	0.384265	82	0.318351	82	0.495426	82	0.517034	82	0.312586	82	0.587925	82	0.1182	82	0.19724	82	0.142955	82	0.212692	82	0.367466		82	0.332194	0.156473
84	0.89171	84	1.11542	84	0.626848	84	0.737416	84	0.806888	84	1.00173		84	0.863335	0.178029									84	0.356742	84	0.300814	84	0.508081	84	0.541005	84	0.335017	84	0.552399	84	0.135529	84	0.268038	84	0.115601	84	0.203856	84	0.384838		84	0.336538	0.152762
86	0.951838	86	1.22091	86	0.640365	86	0.708557	86	0.806888	86	1.15111		86	0.913277	0.23681									86	0.353444	86	0.325644	86	0.449857	86	0.53578	86	0.324101	86	0.551593	86	0.119627	86	0.220524	86	0.101157	86	0.263466	86	0.463167		86	0.337124	0.153828
88	0.90355	88	1.09155	88	0.664146	88	0.768952	88	0.788444	88	1.06324		88	0.879981	0.170993									88	0.406001	88	0.316092	88	0.465393	88	0.513932	88	0.30723	88	0.556613	88	0.115646	88	0.192286	88	0.125385	88	0.234781	88	0.463151		88	0.336046	0.155942
90	0.751024	90	1.05235	90	0.522817	90	0.768952	90	0.894691	90	1.10546		90	0.849214	0.215225									90	0.394884	90	0.350295	90	0.455565	90	0.492856	90	0.332295	90	0.570189	90	0.127213	90	0.220611	90	0.113285	90	0.209999	90	0.450062		90	0.337932	0.152572
92	0.750106	92	1.08959	92	0.593472	92	0.707217	92	0.966165	92	1.12272		92	0.871544	0.218475									92	0.364671	92	0.324476	92	0.491186	92	0.483992	92	0.347244	92	0.567434	92	0.128765	92	0.249556	92	0.128385	92	0.240773	92	0.488759		92	0.34684	0.150087
94	0.70835	94	1.14127	94	0.718794	94	0.729851	94	0.861713	94	0.92708		94	0.847843	0.16888									94	0.350023	94	0.338553	94	0.52595	94	0.532549	94	0.366308	94	0.571563	94	0.153108	94	0.2609	94	0.134345	94	0.273295	94	0.536131		94	0.36752	0.156248
96	0.738338	96	1.34693	96	0.896691	96	0.731116	96	0.771601	96	1.05594		96	0.923436	0.241628									96	0.364774	96	0.335265	96	0.591162	96	0.545623	96	0.362242	96	0.540855	96	0.144121	96	0.263217	96	0.126702	96	0.263182	96	0.54482		96	0.371088	0.165475
98	0.623297	98	1.25052	98	0.693952	98	0.731116	98	0.805638	98	1.0308		98	0.855888	0.238639									98	0.384362	98	0.352934	98	0.586751	98	0.5717	98	0.352039	98	0.502833	98	0.137666	98	0.292927	98	0.142574	98	0.278997	98	0.515238		98	0.374366	0.157142
100	0.680079		1.25052	100	0.684345	100	0.731116	100	0.688232	100	1.05575		100	0.848341	0.244683									100	0.39842	100	0.315677	100	0.582121	100	0.611357	100	0.366808	100	0.491285	100	0.137126	100	0.342028	100	0.138054	100	0.296745	100	0.463708		100	0.376666	0.156268
102	0.623627		1.25052	102	0.622063	102	0.757811	102	0.715084	102	0.801424		102	0.795088	0.234343									102	0.402001	102	0.300933	102	0.563875	102	0.670697	102	0.370815	102	0.479445	102	0.15466	102	0.314958	102	0.149825	102	0.352757	102	0.465492		102	0.384133	0.158391
104	0.599358		1.25052	104	0.691088	104	0.800656	104	0.787564	104	0.935296		104	0.84408	0.228862									104	0.391838	104	0.348177	104	0.638828	104	0.710838	104	0.373691	104	0.562522	104	0.160424	104	0.331131	104	0.201113	104	0.370336	104	0.459565		104	0.413497	0.169599
106	0.662425		1.25052	106	0.697447	106	0.800656	106	0.822395	106	1.05996		106	0.882234	0.228									106	0.395862	106	0.317455	106	0.6035	106	0.619281	106	0.390392	106	0.528507	106	0.172792	106	0.374007	106	0.176712	106	0.255547	106	0.544332		106	0.398035	0.160233
108	0.799472		1.25052	108	0.64664	108	0.800656	108	0.788674	108	0.959812		108	0.874296	0.209302									108	0.448482	108	0.333391	108	0.629931	108	0.716218	108	0.408862	108	0.545098	108	0.136864	108	0.381861	108	0.149546	108	0.272096	108	0.503228		108	0.411416	0.184027
110	0.770273		1.25052	110	0.663805	110	0.800656	110	0.804564	110	1.11149		110	0.900218	0.227678									110	0.477225	110	0.368251	110	0.71848	110	0.638043	110	0.357725	110	0.49759	110	0.156998	110	0.322219	110	0.168589	110	0.292983	110	0.42489		110	0.40209	0.175229
112	0.69559		1.25052	112	0.663805	112	0.800656	112	0.843207	112	1.07522		112	0.888165	0.229517									112	0.440722	112	0.365396	112	0.693064	112	0.571215	112	0.406327	112	0.500864	112	0.178623	112	0.281254	112	0.155612	112	0.292348	112	0.474296		112	0.396338	0.163727
114	0.667256		1.25052	114	0.663805	114	0.800656	114	0.725504	114	0.95586		114	0.843933	0.226892									114	0.48051	114	0.387586	114	0.695548	114	0.594537	114	0.396225	114	0.490493	114	0.168957	114	0.339208	114	0.195052	114	0.299596	114	0.46324		114	0.410087	0.158768
116	0.689554		1.25052	116	0.663805	116	0.800656	116	0.769645	116	0.836896		116	0.835179	0.213809									116	0.476941	116	0.414003	116	0.780231	116	0.57492	116	0.394835	116	0.546902	116	0.200858	116	0.367225	116	0.230479	116	0.268745	116	0.442179		116	0.427029	0.168326
118	0.689554		1.25052	118	0.663805	118	0.800656	118	0.72597	118	0.969178		118	0.849947	0.224877									118	0.463402	118	0.406799	118	0.755364	118	0.554319	118	0.365888	118	0.505679	118	0.181637	118	0.386679	118	0.209319	118	0.349747	118	0.467818		118	0.422423	0.158842
120	0.748687		1.25052	120	0.663805	120	0.800656	120	0.81507	120	0.846416		120	0.854192	0.204407									120	0.445622	120	0.389029	120	0.712008	120	0.490041	120	0.411314	120	0.491488	120	0.21031	120	0.402008	120	0.210551	120	0.247725	120	0.508632		120	0.410794	0.148909
122	0.710608		1.25052	122	0.663805	122	0.801438	122	0.697246	122	0.960466		122	0.847347	0.224663									122	0.460411	122	0.403887	122	0.759835	122	0.494535	122	0.423444	122	0.503405	122	0.190861	122	0.414994	122	0.184359	122	0.334821	122	0.524925		122	0.426861	0.159908
124	0.734489		1.25052	124	0.663805	124	0.894856	124	0.720427	124	0.902774		124	0.861145	0.214134									124	0.451162	124	0.433943	124	0.680286	124	0.593564	124	0.418258	124	0.507888	124	0.194934	124	0.3949	124	0.195065	124	0.367179	124	0.48132		124	0.428955	0.146395
126	0.704039		1.25052	126	0.587424	126	0.880705	126	0.877922	126	1.10563		126	0.90104	0.245807									126	0.44885	126	0.392932	126	0.647382	126	0.580147	126	0.407385	126	0.442422	126	0.21642	126	0.347871	126	0.210557	126	0.473198	126	0.546637		126	0.428527	0.13717
128	0.661015		1.25052	128	0.615207	128	0.951953	128	0.613133	128	0.982859		128	0.845781	0.258961									128	0.512623	128	0.372892	128	0.710414	128	0.613683	128	0.431622	128	0.447345	128	0.212179	128	0.298004	128	0.206005	128	0.421656	128	0.529076		128	0.432318	0.157363
130	0.581601		1.25052	130		130	0.934484	130	1.17129	130	0.875273		130	0.962633	0.264587									130	0.465832	130	0.44767	130	0.651667	130	0.644085	130	0.405646	130	0.481563	130	0.225511	130	0.394484	130	0.233702	130	0.425195	130	0.461857		130	0.439747	0.134692
132	0.69772		1.25052	132	0.601512	132	0.926165	132	1.25462	132	0.887622		132	0.93636	0.272594									132	0.526111	132	0.427346	132	0.660621	132	0.632493	132	0.411104	132	0.490241	132	0.2113	132	0.41701	132	0.240179	132	0.34418	132	0.4824		132	0.440271	0.141563
134	0.70227		1.25052	134	0.759133	134	0.841751	134	1.16358	134	0.969827		134	0.947846	0.221725									134	0.430437	134	0.43008	134	0.679154	134	0.670076	134	0.405358	134	0.50544	134	0.230977	134	0.376889	134	0.240064	134	0.371885	134	0.485668		134	0.43873	0.144968
136	0.754175		1.25052	136	0.759133	136	0.96284	136	0.906016	136	1.0009		136	0.93893	0.183872									136	0.477898	136	0.418153	136	0.734107	136	0.694972	136	0.368268	136	0.577385	136	0.293688	136	0.453239	136	0.245753	136	0.406068	136	0.468844		136	0.467125	0.151871
138	0.692206		1.25052	138	0.759133	138	0.938404	138	1.04683	138	0.938029		138	0.93752	0.200957									138	0.445024	138	0.433029	138	0.721409	138	0.669616	138	0.383111	138	0.586207	138	0.281861	138	0.389682	138	0.253162	138	0.441789	138	0.426919		138	0.457437	0.146928
140	0.715187		1.25052	140	0.796567	140		140	1.02013	140	1.05915		140	0.96831	0.214561									140	0.476809	140	0.399424	140	0.628217	140	0.674849	140	0.375965	140	0.636751	140	0.295613	140	0.454582	140	0.2723	140	0.384762	140	0.506207		140	0.464135	0.136603
142	0.655955		1.25052	142	0.840419	142	0.861832	142	1.37537	142	1.21821		142	1.03372	0.28544									142	0.53597	142	0.437324	142	0.526392	142	0.60689	142	0.360877	142	0.610885	142	0.289829	142	0.445127	142	0.274989	142	0.443139	142	0.389405		142	0.447348	0.114794
144	0.747832		1.25052		0.840419	144	0.885117	144	1.11045	144	1.08191		144	0.986041	0.191181									144	0.593691	144	0.430757	144	0.525878	144	0.599383	144	0.361354	144	0.570144	144	0.293923	144	0.391603	144	0.272489	144	0.387712	144	0.414189		144	0.440102	0.116081
146	0.729971		1.25052		0.840419	146		146	1.03439	146	1.22913		146	1.01689	0.230976									146	0.513696	146	0.463678	146	0.541888	146	0.650246	146	0.385707	146	0.550515	146	0.296472	146	0.387619	146	0.237683	146	0.369254	146	0.415598		146	0.437487	0.120642
148	0.710659		1.25052		0.840419	148		148	1.04957	148	1.15685		148	1.0016	0.223042									148	0.609276	148	0.469254	148	0.554805	148	0.691163	148	0.411314	148	0.604661	148	0.267217	148	0.418753	148	0.215534	148	0.391178	148	0.371877		148	0.455003	0.147969
150	0.727295		1.25052		0.840419	150		150	1.00229	150	1.15242		150	0.994588	0.215456									150	0.598411	150	0.427875	150	0.505354	150	0.641076	150	0.380778	150	0.507297	150	0.269264	150	0.525119	150	0.202309	150	0.363205	150	0.33903		150	0.432702	0.136521
152	0.957216		1.25052		0.840419	152		152	0.893652	152	0.920164		152	0.972394	0.161191									152	0.690985	152	0.485613	152	0.534649	152	0.639602	152	0.409014	152	0.593945	152	0.304948	152	0.484574	152	0.251091	152	0.381081	152	0.479714		152	0.477747	0.13558
154	1.0031		1.25052		0.840419	154		154	0.813046	154	0.925187		154	0.966455	0.175469									154	0.6619	154	0.484536	154	0.519601	154	0.656397	154	0.387579	154	0.591322	154	0.306149	154	0.462426	154	0.207111	154	0.395595	154	0.413793		154	0.462401	0.141361
156	1.0601		1.25052		0.840419	156		156	0.892188	156	0.968645		156	1.00238	0.161568									156	0.586818	156	0.574733	156	0.461942	156	0.697396	156	0.442029	156	0.59198	156	0.311013	156	0.480484	156	0.206331	156	0.376039	156	0.440267		156	0.469912	0.140239
158	1.04917		1.25052		0.840419	158		158	0.87871	158	0.97992		158	0.999748	0.162602									158	0.617361	158	0.562197	158	0.416869	158	0.726009	158	0.454927	158	0.66299	158	0.368355	158	0.502992	158	0.246526	158	0.382448	158	0.463965		158	0.491331	0.14146
160	0.962147		1.25052		0.840419	160		160	0.769824	160	0.969084		160	0.958398	0.183672									160	0.6675	160	0.534625	160	0.471441	160	0.756725	160	0.451624	160	0.610878	160	0.415476	160	0.509758	160	0.248591	160	0.437185	160	0.532486		160	0.51239	0.135783
162	0.796308		1.25052		0.840419	162		162	0.752704	162	1.17828		162	0.963646	0.232404									162	0.734691	162	0.626654	162	0.486926	162	0.764222	162	0.439423	162	0.693777	162	0.315442	162	0.45993	162	0.257972	162	0.412021	162	0.494195		162	0.516841	0.167697
164						164		164	0.702334	164	1.07864		164	0.890485	0.266086									164	0.724454	164	0.564667	164	0.461518	164	0.857051	164	0.487633	164	0.611367	164	0.347561	164	0.436799	164	0.245727	164	0.403471	164	0.533669		164	0.515811	0.171951
166						166		166	0.813658	166	1.04132		166	0.927488	0.16098									166	0.727772	166	0.552517	166	0.444618	166	0.819094	166	0.451317	166	0.646887	166	0.358273	166	0.438014	166	0.245563	166	0.391015	166	0.544831		166	0.5109	0.168736
168						168		168	0.775196	168	1.15313		168	0.964163	0.26724									168	0.659492	168	0.577375	168	0.485921	168	0.772811	168	0.479872	168	0.623693	168	0.337052	168	0.411182	168	0.233321	168	0.420479	168	0.524457		168	0.502332	0.153027
170	0.639552					170		170	0.967626	170	1.11524		170	0.907472	0.243481									170	0.751416	170	0.54453	170	0.491027	170	0.790494	170	0.436686	170	0.594274	170	0.373895	170	0.424293	170	0.247037	170	0.440784	170	0.517319		170	0.51016	0.158383
172	0.724777					172		172	1.01958	172	0.947773		172	0.897376	0.153726									172	0.718536	172	0.556436	172	0.533508	172	0.844356	172	0.471594	172	0.658843	172	0.342066	172	0.431465	172	0.237702	172	0.462637	172	0.481276		172	0.521674	0.170794
174	0.826148					174		174	0.917823	174	0.985787		174	0.90992	0.0801123									174	0.691638	174	0.52177	174	0.528622	174	0.773558	174	0.44439	174	0.663375	174	0.310122	174	0.409023	174	0.234313	174	0.430185	174	0.510372		174	0.501579	0.162022
176	0.858479					176		176	0.985494	176	1.03159		176	0.958522	0.0896531									176	0.753061	176	0.549106	176	0.501471	176	0.797121	176	0.469961	176	0.583128	176	0.346746	176	0.375051	176	0.205932	176	0.445085	176	0.467747		176	0.499492	0.170931
178	0.825503					178		178	0.868116	178	0.910886		178	0.868168	0.0426918									178	0.829135	178	0.539588	178	0.471663	178	0.72569	178	0.462172	178	0.693031	178	0.347062	178	0.407343	178	0.263776	178	0.453769	178	0.490676		178	0.516719	0.169486
180	0.999784					180		180	0.946359	180	0.834796		180	0.92698	0.0841838									180	0.807374	180	0.528034	180	0.452661	180	0.866908	180	0.45709	180	0.66427	180	0.320654	180	0.391378	180	0.291475	180	0.53402	180	0.534298		180	0.531651	0.184313
182	1.02345					182		182	1.0258	182	0.854511		182	0.96792	0.0982224									182	0.73568	182	0.512162	182	0.502367	182	0.93665	182	0.434627	182	0.65891	182	0.33857	182	0.32243	182	0.268271	182	0.439869	182	0.544478		182	0.517638	0.197319
184	0.972215					184		184	0.971662	184	1.04192		184	0.995266	0.0404051									184	0.833529	184	0.559463	184	0.512571	184	0.745466	184	0.435216	184	0.601271	184	0.335921	184	0.341631	184	0.292681	184	0.459648	184	0.507251		184	0.511332	0.168788
186	0.826575					186		186	0.932808	186	0.916061		186	0.891815	0.0571164									186	0.869424	186	0.50565	186	0.532699	186	0.758344	186	0.427464	186	0.643319	186	0.348398	186	0.382215	186	0.306966	186	0.460231	186	0.454501		186	0.517201	0.174538
188	0.853943					188		188	0.833276	188	0.916061		188	0.86776	0.0430872									188	0.806145	188	0.575885	188	0.467009	188	0.776092	188	0.441767	188	0.672801	188	0.341494	188	0.294423	188	0.299897	188	0.516009	188	0.452232		188	0.513068	0.178364
190	0.796811					190		190	0.833276	190	0.916061		190	0.848716	0.0611059									190	0.730572	190	0.535193	190	0.526298	190	0.867315	190	0.426346	190	0.628386	190	0.306378	190	0.351754	190	0.320898	190	0.470958	190	0.532282		190	0.517853	0.173737
192						192		192	0.833276	192	0.916061		192	0.874669	0.0585377									192	0.817826	192	0.524447	192	0.446937	192	0.798912	192	0.429408	192	0.60338	192	0.354093	192	0.379781	192	0.368004	192	0.435626	192	0.539238		192	0.517968	0.162709
194	0.72397					194		194	0.833276	194	0.916061		194	0.824436	0.0963501									194	0.876248	194	0.552439	194	0.463831	194	0.757542	194	0.407543	194	0.531882	194	0.381929	194	0.357877	194	0.320307	194	0.471981	194	0.524291		194	0.513261	0.169524
196	0.772249					196		196	0.675502	196	0.916061		196	0.787937	0.121045									196	0.868384	196	0.529157	196	0.593744	196	0.728158	196	0.398964	196	0.543415	196	0.394939	196	0.417693	196	0.348663	196	0.53016	196	0.53392		196	0.5352	0.15448
198						198		198	0.758344	198	0.916061		198	0.837202	0.111523									198	0.860327	198	0.578414	198	0.477871	198	0.77935	198	0.413794	198	0.553332	198	0.388545	198	0.481573	198	0.313588	198	0.515715	198	0.490993		198	0.532137	0.161637
200	0.765187					200		200	0.87319	200	0.916061		200	0.851479	0.0777448									200	0.863094	200	0.525594	200	0.474729	200	0.742106	200	0.427643	200	0.586128	200	0.393698	200	0.404133	200	0.35639	200	0.511112	200	0.514515		200	0.527195	0.15418
202	0.747737					202		202	0.801342	202	1.07202		202	0.873699	0.173829									202	0.776675	202	0.51574	202	0.463181	202	0.741448	202	0.43436	202	0.584888	202	0.34617	202	0.428889	202	0.387504	202	0.480222	202	0.539879		202	0.518087	0.137012
204	0.715795					204		204	0.937901	204	1.03263		204	0.895442	0.16263									204	0.781764	204	0.499336	204	0.487589	204	0.649145	204	0.422521	204	0.567262	204	0.412327	204	0.370662	204	0.347755	204	0.548826	204	0.499872		204	0.507914	0.127124
206	0.712275					206		206	0.749237	206	1.04619		206	0.835902	0.183053									206	0.741102	206	0.544618	206	0.584034	206	0.697521	206	0.438108	206	0.4805	206	0.391619	206	0.456955	206	0.335123	206	0.564494	206	0.507573		206	0.521968	0.122515
208	0.799591					208		208	0.749237	208	1.13038		208	0.89307	0.207055									208	0.759003	208	0.474452	208	0.582275	208	0.816717	208	0.45784	208	0.475964	208	0.386372	208	0.397719	208	0.337404	208	0.531015	208	0.528139		208	0.522445	0.149396
210	0.799591					210		210	0.749237	210	1.24329		210	0.930704	0.271872									210	0.738811	210	0.501841	210	0.509688	210	0.763653	210	0.456879	210	0.430002	210	0.44922	210	0.454893	210	0.304412	210	0.543693	210	0.502585		210	0.514153	0.132657
212						212		212	0.756656	212	1.20179		212	0.979225	0.31476									212	0.747669	212	0.481115	212	0.515457	212	0.777687	212	0.426277	212	0.416202	212	0.385408	212	0.500581	212	0.312044	212	0.547404	212	0.51012		212	0.510906	0.141776
214	0.726371					214		214	0.756316	214	1.09151		214	0.858066	0.202722									214	0.742805	214	0.443517	214	0.50444	214	0.836838	214	0.475809	214	0.49398	214	0.463432	214	0.453944	214	0.325675	214	0.513996	214	0.443432		214	0.517988	0.14489
216						216		216	0.763321	216	1.17201		216	0.967667	0.288989									216	0.700274	216	0.462061	216	0.499441	216	0.890796	216	0.431289	216	0.490668	216	0.415998	216	0.491356	216	0.279079	216	0.530094	216	0.502349		216	0.517582	0.158911
218	0.749529					218		218	0.872691	218	1.17083		218	0.931018	0.216623									218	0.649013	218	0.496533	218	0.486468	218	0.76681	218	0.424553	218	0.554392	218	0.409784	218	0.493823	218	0.305469	218	0.546812	218	0.545471		218	0.516284	0.122311
220	0.708487					220		220	0.975192	220	1.29229		220	0.991991	0.292266									220	0.624052	220	0.462275	220	0.424377	220	0.805097	220	0.421745	220	0.44947	220	0.422703	220	0.474495	220	0.309623	220	0.519542	220	0.474082		220	0.489769	0.129253
222						222		222	0.908161	222	1.13499		222	1.02157	0.16039									222	0.587012	222	0.45217	222	0.38406	222	0.770693	222	0.386272	222	0.612607	222	0.388675	222	0.497372	222	0.276387	222	0.500867	222	0.472865		222	0.484453	0.135156
224						224		224	0.834245	224	1.18051		224	1.00738	0.244845									224	0.569326	224	0.481954	224	0.386655	224	0.67237	224	0.415566	224	0.479147	224	0.393122	224	0.449649	224	0.379158	224	0.514607	224	0.498251		224	0.476346	0.0882477
226	0.846187					226		226		226	1.29361		226	1.0699	0.316378									226	0.606393	226	0.487891	226	0.317399	226	0.60379	226	0.38379	226	0.464905	226	0.500577	226	0.517644	226	0.335594	226	0.570048	226	0.554242		226	0.485661	0.10161
228	0.892426					228		228		228	1.09261		228	0.99252	0.141554									228	0.631196	228	0.499995	228	0.417588	228	0.622165	228	0.419238	228	0.421458	228	0.431413	228	0.462338	228	0.323777	228	0.521197	228	0.556438		228	0.482437	0.0943603
230	0.92169					230		230		230	1.04204		230	0.981864	0.0850986									230	0.694223	230	0.498102	230	0.450845	230	0.61185	230	0.349239	230	0.436113	230	0.404195	230	0.404733	230	0.338833	230	0.480749	230	0.539278		230	0.473469	0.108565
232	0.830995					232		232		232	1.03254		232	0.931769	0.142516									232	0.648826	232	0.489332	232	0.345191	232	0.70581	232	0.400126	232		232	0.483109	232	0.514023	232	0.40314	232	0.540539	232	0.608533		232	0.513863	0.115435
234	0.948005					234		234		234	0.957255		234	0.95263	0.0065411									234	0.649965	234	0.527799	234	0.343697	234	0.717739	234	0.423556	234		234	0.426665	234	0.519181	234	0.387175	234	0.568132	234	0.595106		234	0.515901	0.120453
236	1.00194					236		236		236	0.980952		236	0.991447	0.0148428									236	0.675677	236	0.525666	236	0.377627	236	0.79897	236	0.421334	236		236	0.392847	236	0.400577	236	0.337864	236	0.604246	236	0.68426		236	0.521907	0.159771
238	1.01411					238		238		238	1.01718		238	1.01565	0.00216834									238	0.737079	238	0.497908	238	0.371755	238	0.796221	238	0.424618	238		238	0.420994	238	0.456486	238	0.335269	238	0.701939	238	0.643935		238	0.53862	0.165978
240	1.01125					240		240		240	0.867587		240	0.939421	0.101587									240	0.611339	240	0.52801	240	0.330616	240	0.685937	240	0.378471	240		240	0.400215	240	0.461282	240	0.314013	240	0.660857	240	0.674066		240	0.504481	0.146528
242	0.908886					242		242		242	0.867587		242	0.888237	0.0292027									242	0.645703	242	0.539894	242	0.344138	242	0.756504	242	0.394034	242		242	0.391004	242	0.379733	242	0.308276	242	0.616838	242	0.602958		242	0.497908	0.153278
244	0.82719					244		244		244	0.867587		244	0.847389	0.0285652									244	0.699638	244	0.540721	244	0.354797	244	0.705442	244	0.418023	244		244	0.334486	244	0.453862	244	0.338636	244	0.577192	244	0.621722		244	0.504452	0.1444
246	0.82719					246		246		246	0.867587		246	0.847389	0.0285652									246	0.690242	246	0.551533	246	0.429854	246	0.814997	246	0.399211	246		246	0.327964	246	0.412027	246	0.339697	246	0.644672	246	0.586408		246	0.519661	0.163542
248	0.761709					248		248		248	0.82204		248	0.791874	0.0426608									248	0.610362	248	0.560522	248	0.380498	248	0.85361	248	0.409962	248		248	0.377078	248	0.570107	248	0.320631	248	0.666942	248	0.623121		248	0.537283	0.164856
250	0.747708					250		250		250	0.82204		250	0.784874	0.0525609									250	0.674705	250	0.564757	250	0.372616	250	0.716738	250	0.379623	250		250	0.326814	250	0.488821	250	0.344376	250	0.560163	250	0.667857		250	0.509647	0.148178
252	0.743801					252		252		252	0.82204		252	0.782921	0.0553232									252	0.710609	252	0.531476	252	0.371714	252	0.742064	252	0.382575	252		252	0.352155	252	0.361	252	0.319652	252	0.581761	252	0.780113		252	0.513312	0.179898
254	0.831385					254		254		254			254	0.831385	#DIV/0!									254	0.664924	254	0.552589	254	0.495871	254	0.895336	254	0.450729	254		254	0.359509	254	0.47767	254	0.338884	254	0.601316	254	0.740815		254	0.557764	0.173136
256	0.905166					256		256		256	0.708665		256	0.806916	0.138947									256	0.736414	256	0.555394	256	0.427595	256	0.671917	256	0.514245	256		256	0.382966	256	0.541791	256	0.376522	256	0.684372	256	0.744428		256	0.563564	0.140628
258	0.711361					258		258		258			258	0.711361	#DIV/0!									258	0.657453	258	0.614791	258	0.430435	258	0.675071	258	0.482714	258		258	0.396609	258	0.412088	258	0.347886	258	0.641726	258	0.808599		258	0.546737	0.152311
260	0.922739					260		260		260	0.722548		260	0.822644	0.141557									260	0.64129	260	0.513058	260	0.422083	260	0.794135	260	0.454302	260		260	0.337812	260	0.365506	260	0.371484	260	0.552125	260	0.954555		260	0.540635	0.202359
262	0.945775					262		262		262	0.835521		262	0.890648	0.0779615									262	0.643112	262	0.49959	262	0.458915	262	0.885195	262	0.44492	262		262	0.487746	262	0.422297	262	0.374612	262	0.640332	262	0.958756		262	0.581547	0.199761
264	0.996774					264		264		264	0.8689		264	0.932837	0.0904205									264	0.650919	264	0.568674	264	0.519279	264	0.822569	264	0.427297	264		264	0.445928	264	0.411966	264	0.401051	264	0.799315	264	1.06562		264	0.611262	0.221958
266	0.88609					266		266		266	0.849855		266	0.867972	0.0256221									266	0.693933	266	0.568991	266	0.451066	266	0.772829	266	0.42093	266		266	0.487188	266	0.444715	266	0.420103	266	0.702968	266	0.939913		266	0.590264	0.178979
268	0.998233					268	0.71582	268		268			268	0.857027	0.199696									268	0.627269	268	0.427285	268	0.530288	268	0.822769	268	0.39824	268		268	0.402013	268	0.478304	268	0.377679	268	0.645953	268	0.933344		268	0.564314	0.191398
270	0.914359					270		270		270			270	0.914359	#DIV/0!									270	0.732949	270	0.573694	270	0.545902	270	0.775954	270	0.464201	270		270	0.409969	270	0.410314	270	0.409307	270	0.589253	270	0.771386		270	0.568293	0.148543
272	0.958118					272	0.642889	272		272	0.759663		272	0.78689	0.159368									272	0.710041	272	0.549305	272	0.470072	272	0.941596	272	0.386914	272		272	0.504438	272	0.516597	272	0.390719	272	0.621821	272	0.799857		272	0.589136	0.180363
274	0.920167					274		274		274	0.738592		274	0.82938	0.128393									274	0.675674	274	0.547016	274	0.516733	274	0.876976	274	0.446171	274		274	0.397293	274	0.431304	274	0.411773	274	0.67691	274	0.980259		274	0.596011	0.203081
276	0.920167					276		276		276	0.864904		276	0.892536	0.0390771									276	0.575095	276	0.619131	276	0.626823	276	0.919365	276	0.418403	276		276	0.402392	276	0.439122	276	0.529845	276	0.704994	276	0.884049		276	0.611922	0.181603
278	0.906826					278		278		278	0.864904		278	0.885865	0.0296435									278	0.602173	278	0.572351	278	0.505162	278	0.885872	278	0.460045	278		278	0.449598	278	0.371906	278	0.485047	278	0.703061	278	0.769697		278	0.580491	0.161434
280	0.859334					280				280	0.864904		280	0.862119	0.00393875									280	0.715591	280	0.587527	280	0.574021	280	0.841579	280	0.430259	280		280	0.455134	280	0.459866	280	0.593258	280	0.74072	280	0.783997		280	0.618195	0.146204
282	0.988698					282				282	0.794518		282	0.891608	0.137306									282	0.670638	282	0.568757	282	0.591043	282	0.882586	282	0.456191	282		282	0.417562	282	0.457789	282	0.435863	282	0.745873	282	0.726342		282	0.595265	0.157779
284	0.948882					284				284	0.864904		284	0.906893	0.0593814									284	0.661744	284	0.630507	284	0.527701	284	0.852674	284	0.470401	284		284	0.483586	284	0.506786	284	0.48353	284	0.656748	284	0.734423		284	0.60081	0.128106
286	1.15276					286				286	0.871131		286	1.01195	0.199144									286	0.702629	286	0.615824	286	0.556865	286	0.694513	286	0.481613	286		286	0.487671	286	0.42843	286	0.510072	286	0.70711	286	0.928274		286	0.6113	0.150441
288	1.28259					288	0.728879			288	0.81601		288	0.942492	0.297735									288	0.687381	288	0.697213	288	0.512454	288	0.797661	288	0.496434	288		288	0.501501	288	0.42628	288	0.525247	288	0.757675	288	0.848364		288	0.625021	0.149183
290	1.06724					290	0.700532			290	0.772423		290	0.846733	0.194322									290	0.693039	290	0.655102	290	0.58439	290	0.868188	290	0.458328	290		290	0.443109	290	0.427051	290	0.571061	290	0.670794	290	0.966829		290	0.633789	0.178716
292	1.02545					292				292	0.795855		292	0.910653	0.162349									292	0.62507	292	0.766931	292	0.692159	292	0.803286	292	0.492533	292		292	0.430867	292	0.430153	292	0.546739	292	0.626637	292			292	0.601597	0.137313
294	1.19989					294	0.708172			294	0.729589		294	0.879219	0.27792									294	0.552799	294	0.711719	294	0.553061	294	0.751351	294	0.516221	294		294	0.466624	294	0.444714	294	0.544621	294	0.63396	294			294	0.575008	0.104487
296	1.09465					296				296	0.631305		296	0.862977	0.327634									296	0.609701	296	0.631655	296	0.666198	296	0.91923	296	0.495995	296	0.543282	296	0.586813	296	0.409517	296	0.484334	296	0.578875	296			296	0.59256	0.137901
298	0.908592					298				298	0.795498		298	0.852045	0.0799693									298	0.436013	298	0.566348	298	0.677417	298	1.01726	298	0.485017	298	0.596131	298	0.469308	298	0.430276	298	0.548244	298	0.423771	298			298	0.564979	0.179108
300	0.87941					300	0.69246			300			300	0.785935	0.132194									300	0.541862	300	0.617457	300	0.523428	300	0.96404	300	0.458801	300	0.549793	300	0.472742	300	0.376249	300	0.599511	300	0.565441	300			300	0.566932	0.15672
302	0.914023					302	0.686434			302	0.815411		302	0.805289	0.114132									302	0.452604	302	0.722849	302	0.60822	302	0.913504	302	0.458627	302	0.551318	302	0.420714	302	0.361572	302	0.499353	302	0.582542	302			302	0.55713	0.162813
304	0.909974					304	0.756632			304	0.703279		304	0.789962	0.107303									304	0.528204	304	0.702929	304	0.718335	304	0.80337	304	0.457446	304	0.620239	304	0.715817	304	0.442828	304	0.499823	304	0.529549	304			304	0.601854	0.126896
306	0.84218					306	0.775834			306	0.75209		306	0.790035	0.046694									306	0.605203	306	0.707243	306	0.680782	306	0.954021	306	0.412309	306	0.619749	306	0.528503	306	0.452219	306	0.503262	306	0.561972	306			306	0.602526	0.155168
308	1.06835					308	0.857789			308			308	0.963068	0.148887									308	0.562638	308	0.622275	308	0.808419	308	0.849799	308	0.407837	308	0.577138	308	0.595558	308	0.423054	308	0.467334	308	0.667268	308			308	0.598132	0.148548
310	0.925741					310	0.797628			310	0.803048		310	0.842139	0.072452									310	0.602097	310	0.759223	310	0.637325	310	1.02138	310	0.424486	310	0.537893	310	0.512206	310	0.428723	310	0.519899	310	0.676209	310			310	0.611944	0.178517
312	0.859725					312	0.679882			312	0.811622		312	0.783743	0.0931063									312	0.57363	312	0.731917	312	0.866375	312	0.881304	312	0.467302	312	0.612483	312	0.520532	312	0.564685	312	0.514793	312	0.72602	312			312	0.645904	0.147415
314	0.998356					314	0.814327			314			314	0.906342	0.130128									314	0.546133	314	0.726591	314	0.778753	314	0.933118	314	0.503452	314	0.656536	314	0.591916	314	0.41659	314	0.473562	314	0.662657	314			314	0.628931	0.156209
316	0.936517					316	0.853347			316			316	0.894932	0.0588099									316	0.450867	316	0.684605	316	0.631194	316	0.911335	316	0.483712	316	0.592927	316	0.504025	316	0.522273	316	0.507355	316	0.746014	316			316	0.603431	0.143725
318	1.0471					318	0.772624			318			318	0.909861	0.194083									318	0.445022	318	0.728488	318	0.751373	318	0.895238	318	0.482144	318	0.637815	318	0.422309	318	0.646562	318	0.485138	318	0.699492	318			318	0.619358	0.155996
320	1.03453					320	0.88372			320			320	0.959123	0.106637									320	0.465319	320	0.636414	320	0.78148	320	0.97672	320	0.499475	320	0.666378	320	0.634203	320	0.454942	320	0.465705	320	0.820913	320			320	0.640155	0.176935
322	0.843452					322	0.731008			322			322	0.78723	0.0795101									322	0.424457	322	0.752746	322	0.537859	322	0.887435	322	0.474712	322	0.554858	322	0.498338	322	0.45423	322	0.417178	322	0.883433	322			322	0.588525	0.183299
324	0.923588					324	0.737594			324			324	0.830591	0.131518									324	0.604811	324	0.693173	324	0.905354	324	0.876464	324	0.465579	324	0.647047	324	0.484168	324	0.618654	324	0.432951	324	0.764267	324			324	0.649247	0.164338
326	0.951458					326	0.844842			326			326	0.89815	0.0753891									326	0.537372	326	0.711172	326	0.777261	326	0.647443	326	0.519704	326	0.560914	326	0.490396	326	0.645812	326	0.477391	326	0.815378	326			326	0.618284	0.12024
328	0.992122					328	0.91439			328			328	0.953256	0.0549644									328	0.481699	328	0.799319	328	0.739599	328	0.731573	328	0.504324	328	0.6476	328	0.412239	328	0.487573	328	0.45783	328	0.854037	328			328	0.611579	0.160984
330	0.85002					330	0.796459			330			330	0.823239	0.0378733									330	0.557426	330	0.799242	330	0.756345	330	0.723697	330	0.461412	330	0.673439	330	0.545293	330	0.630527	330	0.448632	330	0.771037	330			330	0.636705	0.12844

## Sheet: Figure 4F raw data
FRAP of Bfa1-GFP at SPBs of W303 kar9∆ cells with misaligned spindles																																FRAP of Bfa1-GFP at SPBs of spc72∆ cells with misaligned spindles (experiment1)
		cell 1					cell2					cell3					cell4					cell5					cell6					cell 1					cell2					cell3					cell4
time (s)		Frap ROI mean	background mean	ref mean	normalized 0-1		Frap ROI mean	background mean	ref mean	normalized 0-1		Frap ROI mean	background mean	ref mean	normalized 0-1		Frap ROI mean	background mean	ref mean	normalized 0-1		Frap ROI mean	background mean	ref mean	normalized 0-1		Frap ROI mean	background mean	ref mean	normalized 0-1		Frap ROI mean	background mean	ref mean	normalized 0-1		Frap ROI mean	background mean	ref mean	normalized 0-1		Frap ROI mean	background mean	ref mean	normalized 0-1		Frap ROI mean	background mean	ref mean
0		668.551	562.36	666.366	0.978984		644.653	556.67	614.214	0.935423		678.327	533.154	612.996	0.89575		622.735	496.769	528.98	0.967809		613.367	505.677	536.727	1.03611		587.612	493.49	520.601	1.04928		857.388	639.071	702.161	0.990415		1000.67	640.634	695.588	1.01645		888.306	648.242	730.365	1.00371		747.449	612.273	704.89
2		650.653	550.43	649.323	0.970914		636.898	548.409	600.625	1.04635		670.49	524.615	596.521	1.04625		615.143	492.693	523.931	0.970713		602.857	501.879	532.107	0.983773		582	492.025	518.254	1.03191		836.102	628.636	691.092	0.945157		968.898	632.19	684.476	0.996301		872.959	640.114	722.365	0.967991		743.735	607.594	697.799
4		646.02	545.1	637.889	1.0501		623.653	541.739	591.304	1.01823		660.286	517.238	587.184	1.058		611.816	492.407	520.776	1.06148		597.694	499.051	528.659	0.980122		572.837	489.87	516.117	0.918808		830.592	622.788	679.148	1.06443		948.633	622.765	673.766	0.987244		868.327	629.432	709.417	1.02829		738.735	600.298	689.251
6		546.306	536.56	630.337	0		539.388	532.898	582.193	0		549.408	511.946	578.161	0		513	490.029	517.818	0		523.735	496.283	525.507	0		513.571	488.881	514.259	0		639.796	615.354	672.583	0		661.857	616.567	666.474	0		650.571	624.629	703.397	0		609.694	595.93	685.484
8		549.469	533.39	623.07	0.0804528		538.449	532.489	577.153	0.00119459		556.082	509.323	572.142	0.127717		518.571	488.805	515.305	0.0930843		529	496.101	522.495	0.125817		518.367	486.517	511.09	0.135734		633.204	609.657	664.866	-0.000190883		659.306	610.464	658.443	0.0198998		646.122	617.061	697.186	0.0129045		607.02	590.892	678.712
10		547.041	529.25	618.246	0.102459		545.163	529.523	572.96	0.152905		559.306	508.277	568.001	0.206436		522.592	488.245	513.808	0.162241		528.51	493.364	520.533	0.145134		520.49	485.626	509.531	0.203886		626.939	601.818	660.268	0.000879945		657.163	606.211	654.03	0.0284596		647.122	613.705	691.096	0.0396426		608.163	589.085	675.737
12		555.531	526.85	612.878	0.244953		543.388	526.318	569.084	0.179071		554.551	504.369	563.755	0.199713		527.98	487.348	512.481	0.24793		529.918	492.126	518.646	0.198982		518.224	484.087	507.991	0.191141		625.735	600.909	656.321	0.00683539		655.122	603.186	650.449	0.0344664		643.939	608.795	685.282	0.0503544		611.245	585.822	671.822
14		548.204	524.37	609.669	0.187335		547.98	523.58	564.953	0.306672		559.327	503.585	559.614	0.306892		527.102	487.886	511.574	0.26012		534.776	490.621	516.714	0.308446		521.939	483.279	507.28	0.267849		626.408	599.02	652.969	0.0263082		651.061	601	647.445	0.0306815		644.571	607.629	678.673	0.0737694		611.959	585.702	666.89
16		553.959	521.99	605.543	0.297504		543.163	519.557	562.135	0.283015		562.449	501.569	556.732	0.384675		528.245	487.131	510.804	0.285609		541.857	489.99	514.755	0.473209		521	483.362	506.227	0.282685		624.143	597.394	648.175	0.0325406		655.265	599.407	645.162	0.0564255		646.755	606.341	677.59	0.0920469		613.082	582.546	666.266
18		554.959	519.16	603.288	0.343311		548.714	517.989	559.705	0.404928		563.653	502.177	553.66	0.449373		529.184	487.126	509.889	0.320411		540.837	487.586	513.481	0.457662		527.571	482.4	505.029	0.429677		620.796	594.242	645.729	0.0289456		659.857	596.375	642.322	0.0853891		639.347	603.485	676.609	0.0623308		610.102	582.16	663.311
20		551.571	517.93	597.411	0.340886		549	516.83	557.065	0.447119		564.714	498.115	551.188	0.492823		533.796	486.438	509.256	0.391904		539.449	486.818	512.071	0.469022		531.714	481.307	504.354	0.509872		619.02	590.778	645.097	0.0303126		659.143	594.202	640.13	0.091213		641.857	602.311	673.103	0.0887193		611.265	580.073	660.822
22		550.571	516.24	595.541	0.3512		548.163	513.852	553.53	0.490756		559.959	497.077	548.358	0.472346		536.224	486.51	508.431	0.452283		535.347	485.955	510.551	0.437878		536.041	481.682	503.147	0.65487		619.837	592.02	641.03	0.0458707		653.694	593.136	637.162	0.0842852		650.939	601.932	670.205	0.150317		614.061	578.228	658.887
24		554.633	515.41	592.553	0.431823		541.816	513.591	551.919	0.404847		558.98	495.6	545.666	0.500741		535.163	485.4	507.539	0.44597		530.694	486.141	509.394	0.400136		536.939	480.433	502.611	0.661334		620.776	587.849	638.475	0.0729122		651.082	591.678	634.491	0.0864493		648.918	599.03	666.353	0.159301		613.837	578.97	657.499
26		561.837	511.7	590.672	0.566782		545.143	511.966	550.053	0.495006		559.633	494.323	544.131	0.533143		534.388	486.033	506.902	0.467723		530.571	484.859	508.164	0.418759		543.49	480.132	501.287	0.849075		617.898	585.899	637.117	0.0645416		652.082	590.808	632.595	0.100644		645.061	597.356	663.955	0.149734		613.571	576.657	656.373
28		553	509.92	589.171	0.469339		546.429	511.58	548.135	0.550065		550.898	494.569	542.349	0.438518		537.041	485.84	506.377	0.522966		527.204	483.97	507.221	0.376961		541.796	479.398	500.935	0.808052		619.959	585.04	636.321	0.082883		647.51	588.852	630.073	0.0928407		645.02	594.962	662.583	0.15901		617.694	576.942	655.258
30		555.429	508.01	587.345	0.527109		546.612	509.148	547.341	0.56853		550.735	492.669	540.641	0.461039		542.735	485.383	505.85	0.619953		523.531	482.545	506.142	0.32676		539.694	479.232	499.519	0.84294		621.224	584.212	633.967	0.103437		650.408	588.368	628.278	0.11652		642.184	594.712	659.205	0.157387		618.898	575.496	653.855
32		560.286	508.83	584.143	0.618404		539.429	508.739	544.956	0.479145		558.735	492.577	539.513	0.603446		542.714	483.919	505.197	0.607718		529.592	483.717	504.623	0.514171		539.306	478.723	500.017	0.786144		622.286	581.576	632.938	0.119346		651.143	587.085	626.201	0.131493		649.694	594.28	658.051	0.208803		614	575.206	651.749
34		566.816	506.78	584.227	0.716571		543.714	507.341	543.298	0.589053		562.408	490.685	537.611	0.688474		540.551	484.181	504.695	0.602916		533.204	482.01	503.612	0.586085		542.469	478.928	498.139	0.980334		619.265	582.313	630.569	0.110576		652.041	585.269	625.047	0.138872		649.918	593.78	656.006	0.221654		616.796	574.053	650.281
36		572.939	505.8	581.138	0.840382		537.837	507.273	541.838	0.503817		566.224	488.592	536.561	0.752805		536.939	484.598	504.311	0.573817		532.714	481.717	502.048	0.642814		538.878	478.028	498.005	0.870516		622.286	583.222	630.478	0.13046		652.286	585.512	623.639	0.151972		652.633	591.932	653.827	0.252048		618.184	573.15	649.637
38		564.184	503.83	577.57	0.762775		533.02	505.307	541.403	0.425835		566.061	488.692	535.438	0.779062		536.673	484.16	503.858	0.577191		543.265	481.788	501.384	0.900471		540.878	477.412	497.502	0.917999		620.265	579.232	628.314	0.133517		650.673	583.791	623.905	0.136834		659.531	592.265	653.34	0.298737		621.347	572.845	648.09
40		562.204	505.53	574.643	0.764428		531.245	503.352	539.25	0.432026		571.082	489.038	534.182	0.895129		536.918	483.869	503.416	0.592259		541.796	481.742	500.556	0.922907		532.082	477.068	496.767	0.764165		617.531	580.909	627.397	0.117767		644.796	584.443	623.047	0.118121		657.531	591.583	653.154	0.287021		624.714	572.652	647.471
42		562.571	503.52	572.225	0.806559		533.571	504.614	538.219	0.488715		566.531	487.608	532.788	0.844689		532.449	484.21	502.883	0.551286		544.49	479.778	499.736	0.943566		534.245	476.748	496.144	0.836239		620.735	579.707	625.942	0.15029		645.878	584.045	621.412	0.134574		661.898	591.659	648.404	0.351531		628.408	573.361	647.323
44		576.306	501.22	570.083	1.05303		538.837	503.773	536.949	0.619405		569.816	485.723	531.924	0.897111		538.796	483.357	502.611	0.644173		542.673	480.02	499.004	0.967287		533.041	476.496	496.435	0.782292		613.796	579.97	624.746	0.107213		650.082	581.619	620.218	0.155996		656.633	590.606	643.949	0.351523		622.633	572.273	646.366
46		574.327	503.47	568.676	1.04907		541.939	505.386	536.987	0.686212		565.878	486.915	530.555	0.889431		537.673	483.133	502.173	0.639512		535.408	478.439	498.024	0.806888		524.551	476.163	495.806	0.625864		615.571	579.01	624.257	0.124382		649.918	580.919	619.12	0.161851		649.918	590.197	642.712	0.31261		624.061	571.371	644.594
48		568.714	499.17	567.626	0.973524		539.041	503.386	535.237	0.66126		564.122	487.377	529.446	0.90005		535.367	483.802	501.86	0.636695		526.673	478.586	497.454	0.65931		524.102	476.053	495.371	0.635898		615.571	578.98	621.617	0.140762		649.98	580.126	619.459	0.156404		654	589.659	647.186	0.305347		619.592	572.531	643.842
50		566.857	499.78	567.06	0.953337		540.673	501.886	533.968	0.721218		558.918	485.862	528.352	0.825031		533.898	484	501.616	0.629483		524.51	478.581	496.775	0.649397		528.143	475.824	495.318	0.718446		618.449	577.192	620.866	0.168992		651.918	579.609	617.657	0.178826		652.306	587.273	643.577	0.319504		621.673	571.419	643.546
52		559.102	501.99	565.894	0.843099		540.796	499.557	533.505	0.725084		558.571	482.954	527.245	0.816383		533.857	483.088	501.326	0.614155		520.796	479.056	496.628	0.588337		523.041	476.189	495.304	0.620695		618.694	576.273	621.214	0.168753		651.449	579.96	616.214	0.191688		661.204	586.841	644.006	0.375927		621.041	571.787	643.095
54		558.673	499.87	564.374	0.86221		543.531	499.955	531.971	0.823023		554.061	485.208	526.091	0.799841		532.633	483.4	501.09	0.613968		515.551	477.354	496.087	0.450534		522.571	474.848	494.82	0.594843		617.714	575.232	620.416	0.167536		657.959	579.838	617.704	0.208112		659.204	587.5	643.487	0.368141		622.204	570.085	644.223
56		559.837	497.8	564.698	0.87899		544.163	500.17	531.989	0.837438		561.551	483.723	524.91	0.946794		527.347	483.593	500.614	0.54728		515.265	477.455	495.424	0.477229		524.633	475.483	495.126	0.642154		619.633	576.03	618.885	0.192761		654.245	579.966	616.241	0.205334		658.673	586.955	647.917	0.327786		618.531	571.857	641.742
58		551.592	497.24	562.984	0.771583		541.347	498.182	531.887	0.769201		565	483.485	525.011	0.99926		534.837	482.562	500.281	0.666414		513.204	475.197	494.943	0.403735		525.714	475.353	494.791	0.679395		618.102	577.081	617.895	0.188718		658.612	578.587	614.657	0.236118		660.918	585.561	640.365	0.404631		618.918	570.383	640.596
60		554.204	495.76	560.86	0.847414		540.49	498.625	530.366	0.794831		564.918	481.346	524.102	0.993281		534.449	482.91	500.175	0.677382		511.265	477.359	494.5	0.425559		524.122	475.251	494.577	0.653326		615.367	575.333	619.009	0.159835		667.959	579.069	615.464	0.276416		661.673	585.712	643.782	0.378731		622.102	570.632	639.764
62		543.98	496.67	560.835	0.676144		542.531	496.966	529.922	0.837437		562.286	482.908	522.588	1.02606		531.939	482.95	499.756	0.655351		507.204	477.045	493.903	0.3481		531.388	474.913	494.221	0.819686		617.98	573.515	617.103	0.193631		665.204	578.227	614.62	0.266974		659.673	585.576	641.32	0.386913		625.327	568.486	640.815
64		547.367	495.82	559.016	0.759784		545.816	497.739	529.976	0.910246		563.469	482.077	522.129	1.04873		537.633	482.429	499.706	0.743301		506.102	476.591	493.676	0.322822		527.449	475.338	493.726	0.781481		617.755	574.394	616.308	0.198334		663.367	577.425	613.97	0.260084		659.694	585.864	638.404	0.416313		623.388	569.256	638.935
66		541.367	494.55	559.7	0.656167		543.98	497.545	529.322	0.890107		562.857	483.2	521.519	1.08208		532.429	482.526	499.261	0.676372		504.551	475.136	493.343	0.277051		532.122	474.761	493.552	0.873277		627.653	575.475	615.716	0.283918		665.959	578.63	613.176	0.291821		660.449	587.553	636.513	0.448691		625.327	569.323	638.316
68		541.367	493.5	558.054	0.680612		542.49	495.557	529.039	0.850249		564.612	481.715	520.841	1.11064		534.959	482.252	498.994	0.728539		504.469	474.96	492.837	0.291424		525.714	474.734	493.657	0.722739		624.918	573.384	614.117	0.273642		667.551	578.66	613.689	0.293574		666.327	584.106	634.141	0.508429		627.041	570.266	637.464
70		534.878	494.1	557.017	0.58093		546.878	496.659	528.144	0.979636		564.061	483.069	520.76	1.13218		531.061	483.067	498.824	0.696434		502.714	474.343	492.249	0.26429		528.857	474.497	493.164	0.814285		625.245	576.182	614.086	0.283188		667.878	578.708	612.582	0.310639		661.265	583.553	633.41	0.475703		622.653	569.754	637.346
72		537.694	494	554.857	0.655499		547.714	497.557	527.437	1.0356		564.673	480.285	519.906	1.11862		530.98	482.45	498.432	0.693502		505.367	475.652	491.985	0.360522		528.735	474.662	493.18	0.817616		621.959	575.475	613.074	0.26422		666.939	576.958	612.572	0.291579		659.98	585.727	632.083	0.492382		621.347	568.654	638.371
74		536.245	494.6	554.739	0.628279		551.306	495.943	527.148	1.09957		563.857	480.446	519.141	1.13701		529.102	482.495	498.409	0.659653		500.122	474.899	491.438	0.239962		533.673	474.613	493.124	0.931206		624.755	574.556	611.235	0.307415		670.673	576.966	611.776	0.321365		657.367	585	630.737	0.484814		624.184	569.298	636.772
76		543.143	493.01	553.071	0.780101		547.327	494.17	525.432	1.05017		557.143	479.238	518.885	1.00068		527.163	481.107	498.256	0.583384		509.51	475.293	491.064	0.504038		533.388	474.146	492.198	0.969504		625.755	573.515	611.163	0.313615		670.878	576.968	611.198	0.330647		653.939	583.803	630.372	0.455337		621.163	569.622	636.248
78		543.286	493.08	551.632	0.804396		550.551	495.636	525.237	1.1538		547.837	479.238	518.261	0.852596		535.449	481.971	497.438	0.825621		517.184	474.268	491.704	0.623561		538.531	474.051	492.452	1.0629		629.408	573.081	611.357	0.341046		664.816	576.915	611.83	0.28996		652.082	583.333	628.66	0.459465		626.041	569.271	634.97
80		548.184	491.4	551.751	0.893464		551.367	495.92	525.173	1.18075		545.347	479.4	518.003	0.817142		534.245	481.25	496.826	0.808297		526.347	473.611	492.182	0.778573		534.388	473.747	492.461	0.952148		626.51	572.657	610.528	0.324854		668.837	575.996	610.293	0.324069		649.245	582.833	624.66	0.486956		624.571	569.263	634.957
82		549.265	491.26	550.289	0.938039		550.245	493.602	524.58	1.13594		539.388	481.292	518.028	0.726391		536.041	481.29	496.579	0.864383		521.796	472.919	492.296	0.648585		532.673	475.275	493.298	0.928759		630.265	572.96	608.687	0.384265		665.551	576.022	609.488	0.318351		653.735	583.758	627.231	0.495426		627.245	568.308	637.313
84		547.143	492.13	550.701	0.89171		547.735	493.841	523.818	1.11542		534.633	479.869	517.84	0.626848		529.347	481.379	496.48	0.737416		519.571	472.48	491.225	0.644393		532.408	473.46	491.012	1.00173		627.061	573.535	608.757	0.356742		664.184	574.555	609.324	0.300814		651.898	582.636	624.808	0.508081		628.265	568.629	635.895
86		550.837	489.81	551.108	0.951838		553.122	492.068	523.291	1.22091		534.388	478.731	516.822	0.640365		527.959	481.207	496.364	0.708557		523.286	473.364	490.932	0.779371		538.367	473.617	491.05	1.15111		628.286	571.434	609.095	0.353444		663.612	576.117	608.335	0.325644		649.122	582.962	627.308	0.449857		627.245	569.421	635.168
88		548.224	492.76	551.122	0.90355		547.673	492.409	523.77	1.09155		535.449	477.962	516.43	0.664146		530.245	480.979	496.013	0.768952		523.571	473.091	490.718	0.788444		535.041	473.49	491.051	1.06324		631.694	574.727	608.828	0.406001		661.429	575.555	607.806	0.316092		649.347	583.818	626.59	0.465393		624.163	568.777	633.945
90		538.408	491.71	549.543	0.751024		543.592	492.318	522.415	1.05235		527.408	478.546	516.225	0.522817		523.102	481.448	495.979	0.64016		525.898	473.692	490.408	0.894691		534.408	473.511	490.401	1.10546		631.898	572.626	608.845	0.394884		667.878	575.545	607.913	0.350295		651.122	584.326	628.66	0.455565		622.469	569.328	634.028
92		536.51	491.6	547.278	0.750106		546.49	490.273	522.228	1.08959		530.163	477.746	515.305	0.593472		526.531	481.621	496.201	0.707217		527.102	473.843	489.994	0.966165		536.694	473.232	490.635	1.12272		629.755	571.222	609.133	0.364671		664.551	575	608.054	0.324476		653.449	583.045	627.083	0.491186		620.776	569.133	632.942
94		535.837	490.51	549.569	0.70835		547.184	491.398	521.775	1.14127		535.653	478.962	515.052	0.718794		528.449	482.355	496.977	0.729851		525.265	472.439	489.801	0.861713		529.408	472.82	490.611	0.92708		625.265	573.071	607.888	0.350023		667.367	575.366	608.372	0.338553		654.633	584.023	625.84	0.52595		624.551	568.541	632.544
96		537.653	489.18	550.108	0.738338		552.898	494.273	521.621	1.34693		544.633	477.5	514.395	0.896691		525.449	480.574	495.42	0.689158		521.204	472.414	489.699	0.771601		531.98	473.392	490.191	1.05594		627.388	572.818	608.155	0.364774		668.327	574.838	608.599	0.335265		656.592	581.75	622.051	0.591162		625.857	568.276	632.769
98		531.02	489.45	549.888	0.623297		549.857	492.341	521.104	1.25052		535.122	476.531	514.674	0.693952		522.959	481.162	495.271	0.670246		518.286	474.258	489.41	0.805638		529.673	473.496	489.885	1.0308		628.429	571.768	607.087	0.384362		668.265	575.148	607.624	0.352934		653.388	583.136	621.199	0.586751		627.286	569.18	631.784
100		534.143	489.17	549.862	0.680079							533.571	476.977	514.145	0.684345		527.959	480.029	495.214	0.731116		517.327	471.884	489.234	0.688232		531.837	473.546	490.262	1.05575		631.102	572.151	607.937	0.39842		663.714	574.751	608.191	0.315677		652.776	582.477	620.814	0.582121		629.367	567.782	630.504
102		530.245	489.03	548.925	0.623627							530.143	476.592	513.895	0.622063		525.408	481.136	494.794	0.757811		517.347	472.222	489.03	0.715084		522.531	473.039	490.215	0.801424		630.408	570.97	606.813	0.402001		659.143	575.37	607.859	0.300933		656.102	580.318	622.737	0.563875		634.388	568.579	630.531
104		528.082	489.27	547.6	0.599358							532.531	477.9	513.558	0.691088		527.673	480.962	494.79	0.800656		519.592	471.96	488.605	0.787564		526.673	473.03	489.792	0.935296		629.306	571.667	607.09	0.391838		664.816	574.5	606.292	0.348177		661.388	581.651	621.917	0.638828		635.796	568.263	628.742
106		531.633	490.45	547.296	0.662425							532.918	476.731	513.193	0.697447		523.939	479.9	494.595	0.681052		519.265	472.313	488.247	0.822395		529.816	473.606	489.679	1.05996		629.714	569.758	606.328	0.395862		659.061	574.35	606.074	0.317455		659.061	581.659	622.635	0.6035		628.735	567.912	629.188
108		537.612	488.72	546.048	0.799472							529.816	475.746	512.53	0.64664		522.571	480.395	494.489	0.679675		517.796	472.439	488.274	0.788674		526.796	473.178	489.632	0.959812		633.959	571.293	606.095	0.448482		659.204	574.417	605.151	0.333391		660.571	583.03	622.647	0.629931		635.918	569.085	628.549
110		536.592	488.8	546.695	0.770273							525.592	475.915	512.79	0.558845		522.449	480.605	494.343	0.696426		518.51	471.636	487.782	0.804564		532.714	472.852	489.389	1.11149		634.49	571.091	604.659	0.477225		664.571	574.443	604.971	0.368251		668.98	580.773	621.122	0.71848		628.776	569.241	627.722
112		532.388	487.98	546.757	0.69559							520.367	476.354	512.76	0.459991		516.918	480.55	494.245	0.573947		519.163	472.076	487.785	0.843207		529.592	472.83	488.894	1.07522		633.224	570.98	606.01	0.440722		664.184	574.951	605.339	0.365396		661.061	579.955	618.205	0.693064		623.388	567.947	627.722
114		530.061	487.84	545.757	0.667256							522.796	474.323	512.312	0.507926		514.327	479.907	493.806	0.517734		513.347	472.662	487.674	0.725504		526.776	472.715	489.353	0.95586		636.776	571.788	606.015	0.48051		666.061	574.638	604.518	0.387586		661.224	581.189	618.82	0.695548		625.816	567.679	628.296
116		525.102	487.51	545.192	0.584759							518.571	476.154	511.962	0.442554		514.245	480.46	493.747	0.538531		516.367	471.258	487.266	0.769645		521.184	472.946	489.21	0.836896		637.367	570.737	606.032	0.476941		669.469	574.253	603.949	0.414003		663.755	581.886	616.788	0.780231		624.163	568.16	628.216
118		529.735	489.39	543.192	0.689554							521.449	474.338	512.075	0.488208		521.02	479.333	493.457	0.666815		514.633	471.141	487.182	0.72597		526.653	472.668	489.122	0.969178		632.939	570.313	604.232	0.463402		668.184	574.273	603.932	0.406799		665.531	579.72	617.333	0.755364		621.571	567.519	627.271
120		532.592	486.78	543.67	0.748687							521.449	473.892	511.34	0.503616		520	479.388	493.451	0.646844		515.163	472.52	487.08	0.81507		521.245	472.707	488.948	0.846416		633.592	570.394	605.663	0.445622		663.551	574.352	603.429	0.389029		664.408	579.349	618.558	0.712008		617.347	569.326	628.065
122		530.878	487.26	543.936	0.710608							526.939	473.315	511.312	0.604685		525.714	479.55	493.206	0.801438		511.306	472.182	486.995	0.697246		523.714	472.659	488.319	0.960466		633.776	571.424	605.363	0.460411		664.102	573.846	602.497	0.403887		660.612	580.28	615.314	0.759835		617.163	568.371	627.612
124		531.714	484.75	544.05	0.734489							528.735	475.046	510.984	0.663805		529.776	479.19	492.943	0.894856		513.02	471.566	486.932	0.720427		523.633	472.325	488.755	0.902774		634.429	569.768	605.515	0.451162		666.082	574.577	602.163	0.433943		654.306	579.788	615.487	0.680286		623.551	568.644	625.972
126		530.612	487.71	543.905	0.704039							524.347	474.8	510.519	0.587424		528.204	479.448	492.868	0.880705		516.98	472.202	486.73	0.877922		529.918	472.674	488.549	1.10563		632.061	569.99	604.44	0.44885		661.143	574.156	602.313	0.392932		653.633	578.212	615.878	0.647382		622.918	568.975	626.386
128		528.98	488.46	544.493	0.661015							524.776	474.292	509.695	0.615207		530.939	479.333	492.702	0.951953		508.633	471.985	487.03	0.613133		524.49	472.411	488.128	0.982859		634	570.96	602.526	0.512623		659.102	573.664	602.353	0.372892		655.551	579.295	614.513	0.710414		625.367	568.211	626.236
130		525.592	488.46	545.696	0.581601							519.327	475.846	509.406	0.521976		528.469	479.829	492.614	0.934484		524.082	471.712	485.5	1.17129		520.102	472.267	487.913	0.875273		631.306	570.667	603.378	0.465832		665.714	574.071	601.078	0.44767		651.796	579.864	615.59	0.651667		625.673	568.231	624.206
132		530.531	490.11	543.469	0.69772							523.265	475.285	509.39	0.601512		528.551	479.483	492.471	0.926165		527.612	471.157	485.265	1.25462		518.592	472.686	487.558	0.887622		633.388	573.131	602.692	0.526111		664.98	573.239	601.205	0.427346		652.633	579.023	615.167	0.660621		624.959	567.917	624.366
134		530.347	489.08	543.251	0.70227							530.918	475.192	509.438	0.759133		525	479.345	492.356	0.841751		526.061	470.515	485.212	1.16358		522.694	472.337	487.678	0.969827		625.776	570.849	602.319	0.430437		665.98	573.709	601.707	0.43008		652.939	578.242	614.077	0.679154		628.367	568.83	624.922
136		531.735	486.12	542.406	0.754175							521.959	475.992	509.398	0.579469		526.694	480.26	492.182	0.96284		515.755	470.737	485.025	0.906016		521.694	472.961	487.48	1.0009		630.551	570.333	602.182	0.477898		665.122	573.097	601.593	0.418153		658.082	577.697	613.801	0.734107		629.408	569.15	624.173
138		528.755	487.46	542.347	0.692206							523.98	472.354	508.763	0.60946		526.796	479.817	492.125	0.938404		519.816	470.995	484.966	1.04683		521.204	472.23	487.502	0.938029		626.755	571.727	602.468	0.445024		667.347	573.233	601.649	0.433029		657.592	578.576	614.596	0.721409		626.633	568.667	623.311
140		529.98	486.43	542.704	0.715187							532.041	473.508	508.358	0.796567		522.082	478.862	491.925	0.778872		517.98	471.04	484.728	1.02013		525.878	472.041	487.444	1.05915		629.429	570.929	601.924	0.476809		661	572.848	601.053	0.399424		649.347	577.758	614.417	0.628217		625.673	569.622	622.11
142		527	488.51	542.087	0.655955							532.551	473.246	507.312	0.840419		523.143	479.671	491.838	0.861832		526.102	472.157	484.713	1.37537		531.367	472.11	487.406	1.21821		634.204	571.263	601.69	0.53597		665.163	572.146	600.03	0.437324		642.98	577.447	616.231	0.526392		622.98	567.97	624.343
144		530.735	489.04	540.869	0.747832												523.02	479.619	491.519	0.885117		521.592	470.525	484.517	1.11045		526.857	471.752	487.277	1.08191		638.245	571.919	601.458	0.593691		659.184	573.611	599.547	0.430757		639.571	579.212	614.962	0.525878		622.061	568.476	623.967
146		529.776	487.65	541.127	0.729971												519.143	478.74	491.524	0.732381		516.939	471.303	484.477	1.03439		528.571	472.43	486.825	1.22913		634.184	569.626	601.899	0.513696		667.265	572.814	599.938	0.463678		637.122	578.394	612.346	0.541888		624.673	568.955	622.812
148		527.163	487.78	538.95	0.710659												520.755	478.707	491.337	0.785347		520.592	469.773	484.288	1.04957		526.551	471.721	486.429	1.15685		640.102	569.768	600.44	0.609276		667.082	572.543	599.453	0.469254		639.102	578.114	612.705	0.554805		626.388	568.499	621.609
150		527.571	486.38	538.837	0.727295												518.327	479.443	491.059	0.79107		516.367	470.707	484.193	1.00229		524.51	471.876	486.035	1.15242		638.061	570.273	600.27	0.598411		662.918	572.464	600.013	0.427875		636.245	578.523	613.82	0.505354		623.551	569.055	622.371
152		539.041	487.12	539.009	0.957216												513.98	478.226	490.891	0.626507		515.224	469.52	484.166	0.893652		519.143	471.787	486.753	0.920164		644.735	570.515	599.697	0.690985		665.143	573.079	598.624	0.485613		641.939	578.068	615.397	0.534649		620.98	569.657	619.967
154		539.612	486.86	537.408	1.0031												517.204	477.943	490.47	0.72412		512.408	469.258	484.016	0.813046		518.388	471.809	486.474	0.925187		645.959	568.566	600.1	0.6619		666.959	572.907	599.047	0.484536		639.163	579.083	615.013	0.519601		622.02	569.178	619.847
156		539.531	488.13	534.986	1.0601												511.694	478.238	490.499	0.596882		511.735	470.843	483.962	0.892188		521.735	471.595	486.883	0.968645		636.469	569.121	599.399	0.586818		669	573.427	596.744	0.574733		634.286	578.189	615.019	0.461942		624.939	568.782	619.907
158		539.592	486.82	535.379	1.04917												510.49	478.195	490.381	0.572254		511.592	470.854	484.063	0.87871		520.612	471.976	486.685	0.97992		640.959	569.293	600.212	0.617361		671.429	572.785	597.267	0.562197		629.163	577.311	614.173	0.416869		625.796	569.296	618.98
160		535.898	486.17	535.639	0.962147												512.531	478.588	490.222	0.656167		508.776	469.99	483.752	0.769824		521.122	471.55	486.66	0.969084		640.939	570.192	598.818	0.6675		670.918	572.336	597.769	0.534625		631.857	577.538	612.635	0.471441		629.102	569.04	619.992
162		527.388	486.28	534.649	0.796308												513.367	478.274	490.278	0.65801		509.041	469.439	483.702	0.752704		525.408	471.989	486.125	1.17828		644.367	571.646	598.809	0.734691		677.163	573.275	596.955	0.626654		634.857	578.962	614.167	0.486926		626.286	569.12	617.201
164		510.388	485.66	535.897	0.41451												510.51	478.467	490.077	0.606703		508.857	470.576	485.002	0.702334		523.061	471.47	486.037	1.07864		641.857	570.202	597.284	0.724454		672.816	572.599	597.387	0.564667		630.245	579.106	612.705	0.461518		630.959	569.281	616.195
166		516.796	484.48	535.499	0.565224												513.388	478.476	489.999	0.691376		510.082	470.944	484.323	0.813658		522.224	471.603	486.264	1.04132		641.612	570.707	597.403	0.727772		668.388	572.988	596.985	0.552517		632.265	575.144	613.782	0.444618		627.469	568.845	615.251
168		515.878	485.18	534.749	0.550159												513.429	478.307	489.874	0.693456		507.776	470.146	483.436	0.775196		526.102	471.473	486.162	1.15313		639.347	569.263	597.905	0.659492		669.857	572.897	596.468	0.577375		633.653	577.599	612.962	0.485921		625.898	569.444	616.466
170		521.367	487.11	535.837	0.639552												513.02	478.079	489.761	0.679214		512.796	470.591	483.376	0.967626		523.673	471.861	486.139	1.11524		643.551	571.485	597.898	0.751416		665.469	573.492	596.889	0.54453		634.367	577.629	613.128	0.491027		624.959	569.704	614.827
172		523.449	482.99	534.67	0.724777												511.122	478.729	489.676	0.669192		514.102	470.838	483.459	1.01958		518.551	471.461	486.04	0.947773		643.51	569.747	597.818	0.718536		665.959	572.731	596.054	0.556436		636.367	575.561	611.16	0.533508		627.49	569.629	614.223
174		528.429	485.3	534.431	0.826148												511.592	477.486	489.496	0.631762		513.98	469.237	483.309	0.917823		520.388	470.982	485.861	0.985787		639.041	570.818	597.621	0.691638		665.204	572.634	596.964	0.52177		634.653	577.818	611.34	0.528622		624.755	569.747	615.526
176		530.163	485.21	534.711	0.858479												514.122	477.936	489.282	0.741445		514.041	470.081	483.224	0.985494		520.49	471.553	485.822	1.03159		638.735	571.273	595.953	0.753061		667.469	572.211	596.287	0.549106		632.49	577.682	611.404	0.501471		627.51	569.822	616.589
178		527.633	483.86	533.759	0.825503												513.939	477.7	489.153	0.733547		511.857	469.121	483.095	0.868116		517.735	471.137	485.967	0.910886		644.98	571.222	596.086	0.829135		665.592	572.071	596.028	0.539588		632.776	577.833	613.32	0.471663		622.694	569.927	616.346
180		535.592	483.97	533.583	0.999784												512.429	477.512	489.04	0.6911		513.347	469.359	482.897	0.946359		512.224	471.443	485.216	0.834796		643.49	568.556	594.397	0.807374		661.143	572.269	595.416	0.528034		633.184	577.705	614.712	0.452661		628	570.96	613.91
182		536.449	484.52	533.387	1.02345												511.367	477.148	488.839	0.659111		512.755	470.525	482.79	1.0258		513.755	471.046	485.245	0.854511		638.653	569.192	595.108	0.73568		663	571.957	596.226	0.512162		633.449	577.492	611.872	0.502367		632.449	568.987	613.599
184		532.939	484.79	532.243	0.972215												512.959	477.367	488.592	0.735628		511.429	470.343	482.752	0.971662		519.143	471.14	485.037	1.04192		639.102	569.667	592.968	0.833529		665.449	572.7	595.806	0.559463		634.143	577.023	611.558	0.512571		622.286	569.183	614.822
186		526.245	485.27	531.926	0.826575												510	477.29	488.587	0.649228		510.449	470.424	482.869	0.932808		515.245	471.155	485.132	0.916061		639.122	570.515	592.719	0.869424		661.755	571.883	596.073	0.50565		634.939	576.038	610.564	0.532699		622.551	569.534	614.426
188		525.918	486.35	530.126	0.853943												508.347	477.002	488.496	0.596387		507.837	470.318	482.937	0.833276		511.163	471.184	485.881	0.733715		639.347	568.556	593	0.806145		664.388	572.611	594.967	0.575885		630.735	577.136	612.026	0.467009		624.551	569.14	615.123
190		523.082	485.43	529.708	0.796811												507.327	477.102	488.387	0.581092		503.306	470.025	483.092	0.658634		507.796	471.042	485.657	0.647465		633.347	569.101	593.212	0.730572		659.551	573.287	595.524	0.535193		633.735	575.667	610.038	0.526298		627.469	570.489	613.376
192		518.367	484.67	530.36	0.676353												505.755	477.612	488.063	0.585648		504.265	469.545	482.848	0.68444		507.041	471.41	485.449	0.657202		635.102	569.737	592.032	0.817826		660.327	572.403	595.422	0.524447		626.816	577.856	610.84	0.446937		621.857	570.04	611.965
194		519.367	483.56	529.342	0.72397												509.837	477.96	488.077	0.729369		499.959	470.035	482.854	0.57153		508.918	471.416	485.839	0.6833		638.306	569.434	591.574	0.876248		664.735	572.271	595.532	0.552439		632.306	577.901	613.506	0.463831		619.204	568.9	611.534
196		523.082	484.9	531.05	0.772249												509.061	476.857	487.976	0.649493		501.408	470.995	482.746	0.675502		509.408	470.644	484.944	0.729749		638.02	568.141	590.78	0.868384		657.673	572.385	594.562	0.529157		635.878	577.826	608.974	0.593744		619.122	569.058	612.97
198		516.204	483.3	529.575	0.648107												506.449	476.871	487.643	0.60227		505.796	469.879	482.751	0.758344		505.857	471.059	484.977	0.641336		638.918	569.616	592.249	0.860327		657.531	573.073	593.576	0.578414		627.735	575.977	609.064	0.477871		622.735	570.083	613.617
200		520.653	482.59	528.967	0.765187												507.714	477.017	487.647	0.646816		509.082	470.131	482.816	0.87319		508.816	470.922	485.861	0.656606		635.571	570.121	591.437	0.863094		654.143	571.972	593.449	0.525594		627.469	577.318	609.545	0.474729		618.449	568.734	611.629
202		518.816	482.26	527.706	0.747737												504.429	476.205	487.239	0.543302		506.571	469.914	482.575	0.801342		520.735	471.14	485.206	1.07202		633.653	570.071	592.732	0.776675		654.327	572.279	594.035	0.51574		627.265	574.614	609.109	0.463181		619.98	569.862	613.138
204		517.959	482.91	528.166	0.715795												505.122	476.512	487.339	0.569836		508.531	470.96	482.597	0.937901		521.122	471.048	485.638	1.03263		635.51	569.202	592.704	0.781764		651.796	572.267	593.877	0.499336		628.633	575.189	608.814	0.487589		614.939	569.476	613.484
206		518.143	483.19	528.515	0.712275												505.367	477.521	487.34	0.630547		503.102	470.934	482.555	0.749237		519.98	471.309	485.358	1.04619		632.388	569.05	592.536	0.741102		656.918	572.093	593.668	0.544618		632.367	575.924	606.622	0.584034		618.306	569.491	613.925
208		520.531	482.82	527.032	0.799591												501.265	476.76	487.065	0.486834		502.551	469.793	482.611	0.662188		523.286	470.948	485.229	1.13038		634.388	567.495	591.805	0.759003		651.061	572.113	594.402	0.474452		631.551	576.326	606.436	0.582275		622.612	570.308	611.817
210		515.959	484.23	526.989	0.681188												502.388	476.31	487.176	0.493735		501.796	470.616	482.785	0.664902		525.469	470.786	484.687	1.24329		633.082	568.849	592.729	0.738811		652.204	572.053	593.75	0.501841		627.694	576.25	607.494	0.509688		619.959	569.371	611.947
212		512.633	482.35	527.151	0.610629												505.388	476.705	486.93	0.620899		503.449	471.182	482.763	0.756656		523.327	470.984	484.633	1.20179		625.612	572.232	591.879	0.747669		648.469	572.737	593.897	0.481115		621.469	577.235	603.859	0.515457		619.694	569.581	611.093
214		517.918	484.78	527.028	0.726371												502.408	476.664	486.666	0.548314		503.388	470.944	482.592	0.756316		521.959	470.693	485.044	1.09151		628.816	570.384	592.009	0.742805		647.673	571.856	594.352	0.443517		626.449	575.561	606.724	0.50444		621.122	570.323	609.784
216		513.49	482.66	527.105	0.629546												503.184	476.274	486.556	0.561905		505.306	470.121	482.676	0.763321		521.265	471.23	484.523	1.17201		627.265	568.556	591.384	0.700274		647.306	572.17	593.803	0.462061		623.939	577.136	606.026	0.499441		624.837	570.185	610.358
218		517.714	482.24	526.249	0.749529												502.592	476.262	486.554	0.543423		507.327	470.672	482.614	0.872691		522.082	470.877	484.491	1.17083		622.224	569.05	591.07	0.649013		647.224	572.176	592.655	0.496533		622.49	576.462	605.474	0.486468		619.388	570.118	611.436
220		516.061	482.55	526.206	0.708487												500.633	476.905	486.586	0.509747		509.408	471.455	482.888	0.975192		524.816	470.629	484.007	1.29229		619.49	569.98	591.153	0.624052		642.612	572.377	592.592	0.462275		620.327	577.909	607.654	0.424377		618.184	569.842	608.692
222		511	481.95	526.764	0.581048												501.714	476.105	486.493	0.514223		506.531	471.591	482.662	0.908161		521.082	470.293	484.11	1.13499		618.51	569.929	591.764	0.587012		643.204	571.543	592.507	0.45217		620.306	577.849	609.968	0.38406		617.469	571.073	609.81
224		513.796	481.27	526.638	0.654388												498.673	476.352	486.333	0.442391		506.653	470.586	482.707	0.834245		523.694	470.76	484.748	1.18051		616.857	569.424	591.275	0.569326		648.959	571.419	593.056	0.481954		616.612	576.424	606.673	0.386655		613	569.742	610.378
226		521.959	483.95	526.342	0.846187												500.184	476.579	486.166	0.513262		501.776	470.99	482.709	0.691437		527.714	470.915	484.927	1.29361		618.571	569	590.701	0.606393		647.898	572.18	593.116	0.487891		613.041	575.386	608.141	0.317399		609.102	570.617	610.226
228		523.224	482.28	525.841	0.892426												497.163	475.636	486.287	0.374851		500.265	469.641	482.462	0.59375		518.939	470.867	484.314	1.09261		618.735	570.192	590.759	0.631196		647.49	571.621	592.216	0.499995		614.633	575.606	603.314	0.417588		609.429	570.261	609.566
230		524.469	482.8	525.876	0.92169												499.122	476.107	486.146	0.46003		498.163	472.253	482.398	0.661509		517.163	470.987	484.354	1.04204		623.388	569.343	590.51	0.694223		646.531	572.245	592.468	0.498102		618.02	577.447	604.596	0.450845		609.041	570.436	609.727
232		520.449	481.68	525.617	0.830995												501.469	476.645	486.228	0.553503		500.102	470.333	482.515	0.616327		517.184	470.943	484.417	1.03254		620.612	567.919	589.745	0.648826		645.816	571.036	591.667	0.489332		613.184	576.136	606.468	0.345191		614.612	570.158	610.213
234		524.592	482	524.936	0.948005												500.98	476.471	486.089	0.540267		502.633	471.101	482.519	0.746579		512.939	470.88	483.811	0.957255		618.959	569.727	590.09	0.649965		645.755	572.767	591.783	0.527799		612.673	575.182	605.974	0.343697		614.551	571.168	609.697
236		526.224	481.13	524.385	1.00194												501.061	475.56	486.184	0.493847		502.816	471.611	482.554	0.783448		515.122	470.874	484.246	0.980952		619.592	569.061	589.302	0.675677		645.694	571.745	591.071	0.525666		613.02	574.394	603.987	0.377627		617.163	569.717	608.103
238		526.265	481.58	523.979	1.01411												501.857	475.931	486.006	0.548131		499.327	471.126	482.568	0.624932		516.082	471.339	484.517	1.01718		620.02	569.747	588.474	0.737079		644.571	571.504	591.401	0.497908		612.551	575.917	604.314	0.371755		617.735	571.09	608.942
240		526.367	480.45	524.129	1.01125												501.163	476.131	485.789	0.553949		495.98	471.111	482.567	0.504535		510.796	470.851	483.995	0.867587		619.551	567.929	590.379	0.611339		645.49	570.583	590.093	0.52801		610.612	575.947	605.231	0.330616		612.306	570.99	609.143
242		522.286	483.03	524.121	0.908886												500.878	476.31	485.7	0.561656		502.388	470.626	482.574	0.704276		505.306	470.872	483.895	0.70175		620.286	569.687	590.729	0.645703		645.837	571.275	590.367	0.539894		610.694	576.144	604.494	0.344138		615.163	570.201	608.353
244		519	481.4	524.185	0.82719												497.122	475.848	485.407	0.439001		499.98	471.126	482.663	0.639807		504.939	471.226	483.688	0.727437		625.776	567.556	590.211	0.699638		642.939	571.476	589.753	0.540721		610.49	574.106	603.301	0.354797		613.408	570.872	609.216
246		511.714	481.94	524.302	0.639347												496.878	475.174	485.207	0.419455		497.551	471.323	482.566	0.570908		505.143	470.639	483.326	0.733471		622.429	568.515	589.732	0.690242		644.673	571.68	590.066	0.551533		615.388	576.076	603.372	0.429854		617.367	571.754	608.02
248		516.714	480.93	524.704	0.761709												497.816	475.471	485.107	0.468299		498.163	470.859	482.503	0.575853		505.571	471.115	483.606	0.749777		616.673	567.596	588.967	0.610362		645.653	571.69	590.089	0.560522		611.694	578.72	603.84	0.380498		618.816	570.444	607.368
250		515.694	481.2	524.084	0.747708												500.878	475.488	485.03	0.575611		498.837	471.768	482.405	0.657752		505.449	470.441	483.938	0.680616		621.327	567.717	589.217	0.674705		640.531	571.962	588.92	0.564757		611.204	575.697	603.173	0.372616		612.184	570.972	607.617
252		516.388	483.28	524.629	0.743801												499.612	474.624	484.932	0.501321		495.469	472.207	482.725	0.521255		507.918	470.738	483.425	0.82204		622.122	568.444	589.062	0.710609		641.408	571.219	589.409	0.531476		608.306	575.492	600.93	0.371714		611.776	570.351	606.095
254		518.224	479.83	523.324	0.831385												496.776	475.464	484.724	0.46284		493.673	472.399	482.585	0.470827		503.755	470.955	483.735	0.669173		619	569.313	589.482	0.664924		642.347	571.095	589.016	0.552589		616.143	577.121	601.346	0.495871		617	570.985	604.657
256		520.082	481.25	522.046	0.905166												495.857	475.917	484.72	0.451425		494.184	471.455	482.451	0.462007		504.061	471.094	483.485	0.708665		619.898	568	587.347	0.736414		640.816	571.524	588.884	0.555394		612.061	576.447	601.276	0.427595		608.755	570.484	606.456
258		512.98	481.06	522.498	0.711361												499.592	475.812	484.709	0.579358		495.449	471.343	482.527	0.498215		501.245	470.955	483.291	0.622523		619.408	566.707	588.3	0.657453		641.837	571.992	588.155	0.614791		611.531	574.962	600.327	0.430435		608.408	569.822	605.945
260		519.449	480.6	520.72	0.922739												498.204	476.39	485.443	0.496756		495.224	473.273	482.625	0.576795		502.51	471.264	482.864	0.722548		613.776	568.545	587.461	0.64129		636.327	571.488	588.749	0.513058		611.837	575.682	601.141	0.422083		613.857	571.734	605.995
262		519.714	480.61	520.113	0.945775												497.571	474.829	484.337	0.491199		501.469	471.389	482.638	0.710693		506.163	470.931	482.823	0.835521		616.571	567.323	587.871	0.643112		638.653	570.455	588.979	0.49959		615.245	575.015	601.564	0.458915		616.469	570.88	604.579
264		521.735	479.51	520.202	0.996774												497.51	475.524	484.339	0.523295		497.857	472.096	482.596	0.620318		507.184	471.606	483.301	0.8689		614.327	569.061	587.761	0.650919		641.245	571.364	588.554	0.568674		615.367	575.879	599.506	0.519279		614.184	571.511	605.165
266		518.898	481.8	521.52	0.88609												489.98	475.726	484.609	0.244152		494.49	472.242	482.578	0.497017		506.776	471.204	483.074	0.849855		615.061	568.646	586.831	0.693933		640.918	571.751	588.758	0.568991		612.98	574.341	600.186	0.451066		612.531	570.506	605.509
268		520.776	479.71	519.233	0.998233												500.204	474.081	482.487	0.71582		492.735	472.247	482.915	0.401979		503.735	472.322	484.647	0.661704		613.061	568.283	587.352	0.627269		630.163	570.688	588.82	0.427285		614.449	574.197	597.878	0.530288		613.776	571.208	604.772
270		518.204	481.03	519.734	0.914359												497.082	473.75	481.925	0.636239		493.592	472.409	482.726	0.456348		502.796	471.731	483.872	0.665888		616.98	568.889	586.888	0.732949		639.224	571.905	588.352	0.573694		616.184	577.47	599.718	0.545902		611.98	570.396	604.91
272		519.51	481.14	519.454	0.958118												497.184	473.581	481.79	0.642889		492.857	470.227	482.659	0.360924		503.735	471.23	482.914	0.759663		618.531	567.475	587.099	0.710041		640.51	571.338	588.816	0.549305		610.265	575.023	597.846	0.470072		619.694	570.86	605.028
274		519.122	481.72	520.442	0.920167												492.122	472.129	481.315	0.423598		492.469	472.455	482.544	0.427886		502.837	470.626	482.417	0.738592		614.347	568.879	587.092	0.675674		639.898	570.818	588.329	0.547016		612.571	575.068	597.596	0.516733		615.286	571.799	604.211
276		513.245	481.35	519.171	0.789296												487.49	473.152	480.622	0.342932		491	473.667	482.708	0.400605		499.816	470.422	482.674	0.598884		610.959	566.556	586.846	0.575095		644.755	571.344	588.238	0.619131		613.837	575.326	595.083	0.626823		618.265	570.404	604.612
278		517.51	481.45	519.272	0.906826												490.367	472.574	480.84	0.416095		492.306	472.359	482.571	0.415409		501.592	470.867	482.681	0.683541		612.061	567.747	587.257	0.602173		641.755	571.045	588.352	0.572351		613.51	575.515	598.756	0.505162		614.878	570.907	603.388
280		514.551	480.41	517.972	0.859334												492.163	472.014	480.82	0.458631			472.399	482.574			499.898	470.714	482.495	0.631675		619.469	567.485	587.336	0.715591		642.143	570.721	587.849	0.587527		611.408	575.97	595.519	0.574021		612.694	570.571	603.13
282		519.061	480.81	517.943	0.988698												493.551	472.257	480.91	0.512852			471.384	482.635			502.837	470.66	481.891	0.794518		616.878	566.838	587.007	0.670638		643.102	570.607	588.438	0.568757		615.143	574.879	596.564	0.591043		612.796	570.501	601.847
284		517.918	479.67	518.195	0.948882												492.653	472.079	480.568	0.501155			472.136	482.582			505.857	470.921	482.441	0.864904		614.306	568.636	587.248	0.661744		641.878	571.804	587.699	0.630507		611.041	573.939	595.853	0.527701		611.959	570.268	602.123
286		524.224	481.2	517.544	1.15276												495.694	471.84	480.496	0.605394			472.571	482.609			506.061	470.622	482.251	0.871131		614.265	567.768	585.797	0.702629		644.939	570.605	587.784	0.615824		609.612	575.955	594.987	0.556865		605.98	570.662	602.93
288		529.408	480.69	518.01	1.28259												496.163	472.893	480.282	0.728879			472.919	482.68			503.041	470.4	481.593	0.81601		615.735	567.616	586.618	0.687381		644.653	571.229	586.593	0.697213		610.878	574.78	596.609	0.512454		609.939	570.659	602.484
290		520.531	480.7	516.789	1.06724												497.367	471.886	480.216	0.700532			471.323	482.746			502.918	470.477	482.012	0.772423		612.571	568.707	585.911	0.693039		646.102	570.162	586.87	0.655102		611.796	574.265	594.667	0.58439		611.592	570.802	601.476
292		519.367	479.35	516.941	1.02545												493.388	472.4	480.405	0.56337			472.47	482.819			504.061	471.005	482.53	0.795855		610.531	567.97	586.147	0.62507		654.755	570.496	586.806	0.766931		613.388	575.288	593.276	0.692159		610.327	570.689	602.607
294		524.449	478.17	515.858	1.19989												496.306	472.429	480.173	0.708172			472.076	482.749			501.735	470.739	482.175	0.729589		609.592	567.465	587.335	0.552799		644.612	571.972	586.92	0.711719		610.673	574.326	594.994	0.553061		608.776	570.246	603.135
296		520.776	478.46	515.929	1.09465												491.061	471.812	479.485	0.527848			473.212	482.721			500.082	470.844	482.651	0.631305		608.143	570.384	586.841	0.609701		640.531	570.806	586.599	0.631655		613.469	574.25	593.372	0.666198		613.551	571.271	601.494
298		514.224	479.45	515.86	0.908592												485.653	470.69	478.89	0.313228			473.071	482.737			503.204	470.499	481.905	0.795498		601.857	567.616	587.044	0.436013		632.082	571.026	586.093	0.566348		607.755	575.326	590.917	0.677417		617.265	570.564	601.053
300		512.204	479.88	514.722	0.87941												495.143	471.769	479.475	0.69246			473.197	482.606			501.429	470.497	482.342	0.688022		605.184	568.96	586.32	0.541862		640.429	570.852	586.898	0.617457		608.837	575.045	595.135	0.523428		613.796	570.709	600.228
302		514.143	480.19	515.552	0.914023												496.776	471.621	479.967	0.686434			473.783	482.545			504.571	470.713	482.329	0.815411		601.898	567.707	586.563	0.452604		645.367	570.253	585.516	0.722849		610.49	575.849	594.07	0.60822		612.224	570.97	600.624
304		512.571	480.64	514.028	0.909974												498.265	471.583	479.824	0.756632			472.955	482.445			500.327	471.615	482.459	0.703279		606.143	566.394	585.833	0.528204		645.612	570.82	586.367	0.702929		606.51	576.159	590.045	0.718335		606.653	570.551	599.619
306		510.776	479.86	514.486	0.84218												498.122	471.424	479.517	0.775834			472.556	482.508			504.612	470.839	483.058	0.75209		610.857	567.687	586.616	0.605203		647.837	570.381	586.402	0.707243		608.49	575.303	591.192	0.680782		611.633	571.068	599.12
308		518.633	478.62	514.84	1.06835												498.163	471.993	479.344	0.857789			473.242	482.649			500.265	470.878	482.783	0.628001		608.327	567.616	586.549	0.562638		644.571	569.229	586.498	0.622275		610.327	576.129	590.269	0.808419		609	571.426	600.221
310		513.531	478.68	514.567	0.925741												498.347	471.188	479.251	0.797628			472.449	482.759			503.918	470.855	482.314	0.803048		612	566.505	586.537	0.602097		650.673	570.391	586.061	0.759223		607.204	574.833	591.212	0.637325		613.306	570.581	598.373
312		509.122	479.31	512.096	0.859725												496.755	470.571	479.319	0.679882			472.616	482.7			502.673	470.826	481.786	0.811622		609.061	567.444	586.5	0.57363		647.061	571.089	586.37	0.731917		615.224	575.197	590.782	0.866375		608.429	570.471	598.639
314		512.796	478.64	511.509	0.998356												496.551	471.926	479.123	0.814327			473.348	482.716			500.857	470.893	482.583	0.66779		605.796	568.02	586.011	0.546133		644.878	571.053	585.991	0.726591		611.143	575.72	590.846	0.778753		610.633	569.877	598.624
316		511.531	478.76	512.158	0.936517												500.592	470.583	479.046	0.853347			472.111	482.899			501.388	470.564	481.796	0.743829		601.918	566.889	586.264	0.450867		641.102	570.35	585.375	0.684605		608.469	574.644	591.897	0.631194		609.653	570.556	598.719
318		514.959	478.75	512.128	1.0471												496.959	471.064	478.938	0.772624			472.975	482.999			500.408	470.564	482.023	0.68509		599.633	567.081	585.266	0.445022		642.755	570.937	585.438	0.728488		609.49	574.758	590.051	0.751373		609.857	570.296	599.248
320		515.061	477.76	512.522	1.03453												499.163	471.005	478.735	0.88372			472.828	482.884			501.286	470.943	482.273	0.716035		600.633	569.151	586.148	0.465319		635.388	570.895	585.416	0.636414		610.796	575.008	590.244	0.78148		612.327	570.895	598.95
322		510	479.53	513.611	0.843452												497.02	470.143	478.659	0.731008			473.46	482.919			500.02	471.177	482.071	0.703225		599.816	567.798	586.337	0.424457		641.122	570.632	584.488	0.752746		607.898	574.311	593.846	0.537859		607.245	570.093	597.494
324		512.571	478.62	513.653	0.923588												497.143	469.795	478.403	0.737594			473.677	482.769			499.796	470.992	482.152	0.675259		604.49	569.323	584.751	0.604811		645.449	569.492	585.461	0.693173		612.184	575.765	589.41	0.905354		609.367	569.554	599.243
326		512.694	480.4	512.849	0.951458												497.633	470.686	478.344	0.844842			473.475	482.831			501.02	470.863	481.556	0.775723		603.224	569.465	585.751	0.537372		644.633	569.955	585.332	0.711172		609.163	575.477	589.885	0.777261		600.041	570.281	599.153
328		515.245	479.08	514.079	0.992122												499.51	470.402	478.184	0.91439			472.369	482.783			499.796	471.01	482.523	0.641373		603.653	565.303	585.462	0.481699		646.082	570.854	584.926	0.799319		608.49	575.803	590.391	0.739599		603.265	569.807	599.035
330		509.694	477.06	513.312	0.85002												495.776	470.4	477.942	0.796459			473.525	482.816			499.163	471.044	481.411	0.730415		603.531	568.172	584.739	0.557426		645.694	570.889	584.883	0.799242		607.796	575.341	589.551	0.756345		601.714	570.464	598.02
[truncated: 85 more columns]
