# Supplementary material for: A FRET-based study reveals site-specific regulation of spindle position checkpoint proteins at yeast centrosomes
Source: eLife. 2016 May 9;5:e14029. doi: 10.7554/eLife.14029 (PMC4878874; doi:10.7554/eLife.14029)
Supplement: Figure 5—source data 1. — DOI: http://dx.doi.org/10.7554/eLife.14029.034 [file elife-14029-fig5-data1.xls]

## Sheet: Experiment1 
Bfa1-GFP levels on SPB1 and SPB2								Bfa1-GFP levels on SPB1 and SPB2									Bfa1-GFP levels on SPB1 and SPB2									Bfa1-GFP levels on SPB1 and SPB2									Bfa1-GFP levels on SPB1 and SPB2									Bfa1-GFP levels on SPB1 and SPB2
condition: kar9∆ aligned spindle								condition: kar9∆ misaligned spindle									condition: spc72∆ aligned spindle									condition: spc72∆ misaligned spindle									condition: kar9∆kin4∆ aligned spindle									condition: kar9∆kin4∆ misaligned spindle
P=0,26*10¯¹⁶								P=0,012									P=0,08*10¯¹⁶									P=0,24*10¯⁴									P=0,10*10¯²⁰									P=0,15*10¯⁹
FL(SPB1)bg cor	FL(SPB2)bg cor		FL(SPB1) norm. to max	FL(SPB1) norm. to max				FL(SPB1)bg cor	FL(SPB2)bg cor		FL(SPB1) norm. to max	FL(SPB1) norm. to max					FL(SPB1)bg cor	FL(SPB2)bg cor		FL(SPB1) norm. to max	FL(SPB1) norm. to max					FL(SPB1)bg cor	FL(SPB2)bg cor		FL(SPB1) norm. to max	FL(SPB1) norm. to max					FL(SPB1)bg cor	FL(SPB2)bg cor		FL(SPB1) norm. to max	FL(SPB1) norm. to max					FL(SPB1)bg cor	FL(SPB2)bg cor		FL(SPB1) norm. to max	FL(SPB1) norm. to max
5594244	1055082		0.34755	0.065549				1339102	1075266		0.083195	0.066803					10199959	814673		0.54438	0.043479					4970428	3969244		0.26527	0.21184					6927898	878797		0.72326	0.091745					4237756	2098858		0.44241	0.21912
16095856	1230408		0.99999	0.076442				1165041	956142		0.072381	0.059402					14113795	1800286		0.75326	0.096082					8453735	8194754		0.45118	0.43736					5306408	2708162		0.55398	0.28273					4438877	2231348		0.46341	0.23295
4769447	913734		0.29631	0.056768				1456326	1082305		0.090478	0.067241					13882246	3021145		0.7409	0.16124					5846141	4525242		0.31201	0.24151					8993795	956285		0.93894	0.099835					4534365	2112551		0.47338	0.22055
2154631	1288734		0.13386	0.080065				1520797	1138388		0.094483	0.070725					16755918	4876348		0.89427	0.26025					8458590	3758430		0.45144	0.20059					7190307	1222184		0.75066	0.12759					2631020	1779897		0.27467	0.18582
6665797	2117531		0.41413	0.13156				1890408	1344938		0.11745	0.083557					12596145	2346551		0.67226	0.12524					5863104	5464022		0.31292	0.29162					9578674	1533857		1	0.16013					3547655	2356082		0.37037	0.24597
2223550	752632		0.13814	0.046759				2204244	1987531		0.13694	0.12348					12596145	2346551		0.67226	0.12524					4998164	2649225		0.26675	0.14139					6928268	758430		0.7233	0.079179					5954223	1605469		0.62161	0.16761
4069389	766613		0.25282	0.047628				1605305	988428		0.099733	0.061408					18327613	1587164		0.97815	0.084707					5926713	5345181		0.31631	0.28527					4025552	841224		0.42026	0.087822					3859510	2237265		0.40293	0.23357
6942754	1606164		0.43133	0.099787				3280918	1662857		0.20383	0.10331					18737469	619775		1	0.033078					5300062	4145039		0.28287	0.22122					6276756	695959		0.65528	0.072657					5544571	3679387		0.57884	0.38412
5124754	966551		0.31839	0.060049				1668715	1527428		0.10367	0.094895					12896164	1140592		0.68827	0.060874					7078613	3706203		0.37779	0.1978					2761695	569816		0.28832	0.059488					3423959	3228367		0.33704	0.35746
7426674	738348		0.4614	0.045872				3157186	2482715		0.19615	0.15424					9616019	1856592		0.51321	0.099087					8660512	6758367		0.46221	0.3607					5403063	635287		0.56407	0.066323					3046143	2163368		0.31801	0.22585
9298123	838612		0.57767	0.052101				3760939	3291510		0.23366	0.20449					11829776	4715733		0.63136	0.25168					7831856	3744816		0.41799	0.19986					4072855	578244		0.4252	0.060368					2535367	2220896		0.26469	0.23186
5774754	743672		0.35877	0.046202				1860551	1674715		0.11559	0.10405					9616019	1856592		0.51321	0.099087					5056348	4274309		0.26986	0.22812					6109672	1211838		0.63784	0.12651					5657961	1892816		0.59068	0.19761
10919590	1508408		0.6784	0.093713				2319123	1683307		0.14408	0.10458					11829776	4715733		0.63136	0.25168					8048998	4957858		0.42958	0.2646					3605570	1837060		0.37642	0.19179					4576980	3100408		0.47783	0.32368
15303082	1115572		0.95074	0.069307				1829633	1366449		0.11367	0.084894					7979125	1497715		0.42585	0.079934					8883797	6910145		0.47413	0.3688					3323756	2536959		0.34699	0.26485					3875592	2313429		0.40461	0.24152
7193348	998082		0.4469	0.062008				3363328	2535225		0.20895	0.15751					7343426	1594795		0.39192	0.085115					8434285	655184		0.45014	0.034967					5166817	896389		0.53941	0.093581					2806978	2764224		0.29304	0.28858
7705104	1605696		0.4787	0.099757				1984572	1145531		0.1233	0.071169					9574693	1338123		0.511	0.071416					5558650	4532572		0.29667	0.2419					3749388	1862959		0.39143	0.19449					2444776	1263448		0.25523	0.1319
10967959	990224		0.68141	0.06152				1714817	1140510		0.10654	0.070857					18451410	3165367		0.98476	0.16894					4196572	2479550		0.22397	0.13233					6788980	780103		0.70876	0.081441					3377080	1575264		0.35256	0.16445
8062942	470817		0.50093	0.029251				1727858	1226041		0.10735	0.076171					8310571	1626244		0.44354	0.086793					5448283	4198916		0.29078	0.2241					4630162	883654		0.48338	0.092252					3675776	3086184		0.38374	0.32219
4939899	1044491		0.3069	0.064891				2046858	1670858		0.12717	0.10381					10156406	1393449		0.54205	0.074369					19393817	7180899		1.0351	0.38325					6588999	701795		0.68788	0.073266					2790674	1229857		0.29134	0.12839
8604447	625183		0.53457	0.038841				2888550	2009000		0.17946	0.12481					10864635	2170654		0.57985	0.11585					7192490	4058244		0.38387	0.21659					6043732	578244		0.63096	0.060368					3597899	1373838		0.37561	0.14343
6780328	1271898		0.42124	0.07902				1955551	1929674		0.12149	0.11989					15340309	4827695		0.81872	0.25766					8149816	7485715		0.43496	0.39952					5150144	1211838		0.53767	0.12651					5722654	2421693		0.59744	0.25282
12473367	469184		0.77494	0.029149				1968287	1456959		0.12228	0.090517					7613309	5341899		0.40632	0.2851					10325613	5416695		0.55108	0.28909					4222693	1837060		0.44084	0.19179					2678553	2440041		0.27964	0.25474
8941695	910715		0.55552	0.05658				2052571	1627877		0.12752	0.10114					4953510	2939856		0.26437	0.1569					4751592	3703142		0.25359	0.19764					2898918	1172428		0.30264	0.1224					4503592	3129510		0.47017	0.32672
4354409	1497674		0.27053	0.093046				1338531	1138063		0.083159	0.070705					7304675	908388		0.38985	0.048481					5989713	4291143		0.31967	0.22902					3859510	2237265		0.40293	0.23357					2925469	2882797		0.30541	0.30096
8015901	852633		0.49801	0.052972				1861430	1294797		0.11565	0.080442					7114368	1622081		0.3797	0.086571					4751592	3703142		0.25359	0.19764					6024059	1325020		0.6289	0.13833					4632286	1693756		0.4836	0.17683
7546471	894633		0.46884	0.055581				1170756	1062387		0.072736	0.066003					9138326	1319632		0.48772	0.070429					5989713	4291143		0.31967	0.22902					5999019	1688879		0.62629	0.17632					3480019	2337428		0.36331	0.24402
11149366	514387		0.69268	0.031957				2993673	2054388		0.18599	0.12763					6008287	1705144		0.32066	0.091004					4280531	1752408		0.22845	0.093527					5816287	784959		0.60721	0.081948					5336938	972327		0.55717	0.10151
10099327	774797		0.62744	0.048136				1624102	1578899		0.1009	0.098093					6077859	1610367		0.32438	0.085946					10794060	4985572		0.57608	0.26608					5255123	686367		0.54863	0.071656					5172529	3248063		0.54	0.33909
6737653	1006858		0.41859	0.062553				3260695	2773980		0.20258	0.17234					5283467	5163877		0.28198	0.2756					6366184	5598938		0.33977	0.29882					4308674	1382368		0.44982	0.14432					5539225	2476063		0.57829	0.2585
7041611	700529		0.43748	0.043522				3562082	3492857		0.2213	0.217					8768774	4139633		0.46799	0.22093					3869039	3588223		0.20649	0.1915					6304186	1199104		0.65815	0.12518					3261572	1698654		0.3405	0.17734
4150488	1507633		0.25786	0.093665				1236754	897225		0.076836	0.055742					10330511	2196959		0.55134	0.11725					11690777	6898942		0.62394	0.3682					4504304	1804447		0.47024	0.18838					3970286	3193797		0.41449	0.33343
12951836	746734		0.80466	0.046393				1855674	1683633		0.11529	0.1046					11055776	952408		0.59005	0.05083					6574877	2812387		0.3509	0.1501					5880307	764530		0.61389	0.079816					3695367	2262080		0.38579	0.23616
6975635	1685184		0.43338	0.1047				1613041	1584571		0.10021	0.098445					10754877	3673530		0.57399	0.19606					7897082	1434000		0.42147	0.076533					4633916	501918		0.48377	0.052399					2788981	1671022		0.29116	0.17445
