# Supplementary material for: A FRET-based study reveals site-specific regulation of spindle position checkpoint proteins at yeast centrosomes
Source: eLife. 2016 May 9;5:e14029. doi: 10.7554/eLife.14029 (PMC4878874; doi:10.7554/eLife.14029)
Supplement: Figure 7—source data 1. — DOI: http://dx.doi.org/10.7554/eLife.14029.038 [file elife-14029-fig7-data1.xlsx]

## Sheet: Description
area:	the area of the box drawn around the SPB in µm2
mean FI SPB	mean Fluoresence intensity measured at the area around the SPB
mean FI background	mean Fluoresence intensity measured at an area free from the cells but close to the SPB of interest
mean FI corrected	mean FI SPB minus mean FI backgound
SPB1	SPB close to the bud
SPB2	SPB away from the bud
mSPB	SPB that resides in the mother
dSPB	SPB that resides in the bud

## Sheet: BFA1-GFP SPC72-GBP normal
BFA1-GFP SPC72-GBP kar9∆ cells with normal aligned spindle
	area	mean FI SPB	mean FI background	mean FI corrected		mean FI corrected
dSPB	0.9216	27791.2	26749.7	1041.57		dSPB	mSPB	p-value (dSPB vs mSPB):	0.00286782
mSPB	0.9216	27646.4	26873.5	772.881		1041.57	772.881
dSPB	0.9216	27028.8	26591.5	437.242		437.242	799.405
mSPB	0.9216	27470.8	26671.4	799.405		725.833	500.984
dSPB	0.9216	27392.8	26667	725.833		945.04	313.591
mSPB	0.9216	26998.3	26497.3	500.984		1276.96	377.27
dSPB	0.9216	27848.9	26903.8	945.04		1155.75	535.163
mSPB	0.9216	26789.1	26475.5	313.591		1869.99	835.861
dSPB	0.9216	27904.6	26627.7	1276.96		1305.56	1053.47
mSPB	0.9216	26946.6	26569.3	377.27		1060.74	35.131
dSPB	0.9216	27930.8	26775	1155.75		635.528	776.135
mSPB	0.9216	27019.6	26484.4	535.163		576.663	906.571
dSPB	0.9216	29202	27332	1869.99		1098.29	244.798
mSPB	0.9216	27639.9	26804	835.861		353.028	555.496
dSPB	0.9216	28317.8	27012.2	1305.56		842.27	404.409
mSPB	0.9216	28190.5	27137	1053.47		1129.17	344.734
dSPB	0.9216	27873	26812.3	1060.74		800.079	417.187
mSPB	0.9216	26361.4	26326.3	35.131		606.016	489.508
dSPB	0.9216	27027	26391.5	635.528		1384.57	681.202
mSPB	0.9216	27425.5	26649.4	776.135		909.909	240.631
dSPB	0.9216	27138.1	26561.4	576.663		803.798	812.75
mSPB	0.9216	28042.8	27136.2	906.571		981.246	583.302
dSPB	0.9216	27992.2	26894	1098.29		296.067	610.159
mSPB	0.9216	26678.1	26433.3	244.798		1224.17	428.349
dSPB	0.9216	26759	26406	353.028		474.187	1103.3
mSPB	0.9216	27070.9	26515.4	555.496		1142.96	159.544
dSPB	0.9216	27825.6	26983.3	842.27		760.603	715.552
mSPB	0.9216	26864.4	26460	404.409		993.298	434.687
dSPB	0.9216	28146.9	27017.7	1129.17		1280.81	334.496
mSPB	0.9216	26950.3	26605.6	344.734		918.258	260.079
dSPB	0.9216	27511.2	26711.1	800.079		839.921	537.663
mSPB	0.9216	26971.5	26554.3	417.187		532.401	1009.05
dSPB	0.9216	27318.7	26712.7	606.016		785.929	235.048
mSPB	0.9216	26885.7	26396.2	489.508		548.98	329.556
dSPB	0.9216	28325.9	26941.3	1384.57		410.183	803.488
mSPB	0.9216	27425.4	26744.2	681.202		1003.19	999.179
dSPB	0.9216	27620.9	26711	909.909		1026.63	652.087
mSPB	0.9216	26722.4	26481.8	240.631		929.893	227.389
dSPB	0.9216	27564.1	26760.3	803.798		798.798	398.925
mSPB	0.9216	27410.2	26597.5	812.75		426.187	942.758
dSPB	0.9216	27850.1	26868.9	981.246		1062.4	415.254
mSPB	0.9216	27375.9	26792.6	583.302		454.151	1405.48
dSPB	0.9216	26660.4	26364.3	296.067		218.619	895.563
mSPB	0.9216	27206.2	26596	610.159		872.246	907.397
dSPB	0.9216	28103.3	26879.1	1224.17		485.794	1639.57
mSPB	0.9216	26934	26505.7	428.349		606.893	1666.96
dSPB	0.9216	27083.7	26609.5	474.187		869.69	405.409
mSPB	0.9216	28111.1	27007.8	1103.3		693.083	173.246
dSPB	0.9216	28167.5	27024.5	1142.96		565.433	883.837
mSPB	0.9216	26616.7	26457.2	159.544		790.163	158.817
dSPB	0.9216	27307.6	26547	760.603
mSPB	0.9216	27440.4	26724.9	715.552
dSPB	0.9216	27949.8	26956.5	993.298
mSPB	0.9216	27123.5	26688.8	434.687
dSPB	0.9216	28397.4	27116.6	1280.81
mSPB	0.9216	26918.9	26584.4	334.496
dSPB	0.9216	27821.7	26903.5	918.258
mSPB	0.9216	26542.7	26282.6	260.079
dSPB	0.9216	27448.5	26608.6	839.921
mSPB	0.9216	27190.1	26652.4	537.663
dSPB	0.9216	27078.7	26546.3	532.401
mSPB	0.9216	27777.1	26768	1009.05
dSPB	0.9216	27669.8	26883.8	785.929
mSPB	0.9216	26784.3	26549.3	235.048
dSPB	0.9216	27275.9	26727	548.98
mSPB	0.9216	26831.8	26502.2	329.556
dSPB	0.9216	26932.4	26522.2	410.183
mSPB	0.9216	27413.4	26609.9	803.488
dSPB	0.9216	27759.7	26756.5	1003.19
mSPB	0.9216	27908.8	26909.6	999.179
dSPB	0.9216	27757.6	26730.9	1026.63
mSPB	0.9216	27235.9	26583.9	652.087
dSPB	0.9216	27730.2	26800.4	929.893
mSPB	0.9216	26737.6	26510.2	227.389
dSPB	0.9216	27493.8	26695	798.798
mSPB	0.9216	26915.6	26516.7	398.925
dSPB	0.9216	26948.7	26522.5	426.187
mSPB	0.9216	27687.5	26744.7	942.758
dSPB	0.9216	27876.9	26814.5	1062.4
mSPB	0.9216	26933.9	26518.6	415.254
dSPB	0.9216	26790	26335.8	454.151
mSPB	0.9216	28390.6	26985.1	1405.48
dSPB	0.9216	26501.3	26282.7	218.619
mSPB	0.9216	27434.8	26539.2	895.563
dSPB	0.9216	27425.1	26552.9	872.246
mSPB	0.9216	27708.9	26801.5	907.397
dSPB	0.9216	27114	26628.2	485.794
mSPB	0.9216	28943.1	27303.6	1639.57
dSPB	0.9216	27547.8	26940.9	606.893
mSPB	0.9216	29018	27351.1	1666.96
dSPB	0.9216	27478.3	26608.6	869.69
mSPB	0.9216	26686.7	26281.3	405.409
dSPB	0.9216	27388.8	26695.8	693.083
mSPB	0.9216	26516.6	26343.4	173.246
dSPB	0.9216	27127.6	26562.2	565.433
mSPB	0.9216	27500.2	26616.4	883.837
dSPB	0.9216	27398.8	26608.6	790.163

## Sheet: BFA1-GFP SPC72-GBP misaligned
BFA1-GFP SPC72-GBP kar9∆ cells with misaligned spindle
	area	mean FI SPB	mean FI background	mean FI corrected		mean FI corrected
SPB1	0.9216	27054.1	26536.6	517.496		SPB1	SPB2	p-value (SPB1 vs SPB2):	0.154795
SPB2	0.9216	26996.2	26537.4	458.802		517.496	458.802
SPB1	0.9216	28201.2	27047.5	1153.75		1153.75	1567.75
SPB2	0.9216	28750.2	27182.5	1567.75		1288.09	336.282
SPB1	0.9216	28131.4	26843.4	1288.09		526.552	225.052
SPB2	0.9216	26746.1	26409.9	336.282		772.774	374.48
SPB1	0.9216	26969.9	26443.4	526.552		370.147	664.817
SPB2	0.9216	26504.7	26279.6	225.052		585.683	593.29
SPB1	0.9216	27316.9	26544.1	772.774		626.171	332.282
SPB2	0.9216	26757.7	26383.2	374.48		641.706	1360.25
SPB1	0.9216	26771.6	26401.5	370.147		524.925	846.44
SPB2	0.9216	27272.4	26607.6	664.817		398.972	999.52
SPB1	0.9216	27325.6	26739.9	585.683		2958.34	661.964
SPB2	0.9216	27421.1	26827.8	593.29		410.21	767.806
SPB1	0.9216	27361.5	26735.4	626.171		875.897	255.79
SPB2	0.9216	26760.1	26427.9	332.282		727.77	303.226
SPB1	0.9216	27152.3	26510.6	641.706		668.012	252.635
SPB2	0.9216	28211.8	26851.5	1360.25		391.798	336.052
SPB1	0.9216	27056.9	26532	524.925		570.139	196.607
SPB2	0.9216	27652.3	26805.9	846.44		321.262	891.5
SPB1	0.9216	26868.2	26469.3	398.972		730.488	207.429
SPB2	0.9216	27820.6	26821	999.52		1022.36	660.655
SPB1	0.9216	27820.6	24862.2	2958.34		953.206	488.242
SPB2	0.9216	27308.5	26646.5	661.964		559.71	260.766
SPB1	0.9216	27006.6	26596.4	410.21
SPB2	0.9216	27344.8	26577	767.806
SPB1	0.9216	27600.1	26724.2	875.897
SPB2	0.9216	26748.6	26492.8	255.79
SPB1	0.9216	27374.6	26646.8	727.77
SPB2	0.9216	26691.1	26387.9	303.226
SPB1	0.9216	27181.3	26513.3	668.012
SPB2	0.9216	26657.5	26404.9	252.635
SPB1	0.9216	26922.1	26530.3	391.798
SPB2	0.9216	27013.4	26677.4	336.052
SPB1	0.9216	27291.6	26721.5	570.139
SPB2	0.9216	26754.2	26557.6	196.607
SPB1	0.9216	26701.3	26380.1	321.262
SPB2	0.9216	27499.5	26608	891.5
SPB1	0.9216	27396.2	26665.7	730.488
SPB2	0.9216	26554.2	26346.8	207.429
SPB1	0.9216	27875.4	26853	1022.36
SPB2	0.9216	27218.1	26557.4	660.655
SPB1	0.9216	27870.8	26917.6	953.206
SPB2	0.9216	27160.5	26672.3	488.242
SPB1	0.9216	26989.6	26429.9	559.71
SPB2	0.9216	26687.4	26426.7	260.766

## Sheet: BFA1-GFP normal
BFA1-GFP kar9∆ cells with normal aligned spindle
	area	mean FI SPB	mean FI background	mean FI corrected		mean FI corrected
dSPB	0.9216	27561.2	26782.4	778.821		dSPB	mSPB	p-value (dSPB vs mSPB):	1.26938e-20
mSPB	0.9216	26426.2	26364.3	61.9722		778.821	61.9722
dSPB	0.9216	28112.6	27035	1077.55		1077.55	186.508
mSPB	0.9216	26699.5	26513	186.508		850.444	160.952
dSPB	0.9216	27756.9	26906.5	850.444		1424.42	102.417
mSPB	0.9216	26675.4	26514.5	160.952		969.19	179.385
dSPB	0.9216	28289.4	26865	1424.42		614.655	102.46
mSPB	0.9216	26696.2	26593.7	102.417		529.31	609.159
dSPB	0.9216	28009.6	27040.4	969.19		1190.72	106.782
mSPB	0.9216	26814.8	26635.4	179.385		1340.38	64.3492
dSPB	0.9216	27153.6	26538.9	614.655		888.806	448.46
mSPB	0.9216	26627.1	26524.7	102.46		1621.29	76.7341
dSPB	0.9216	27230.7	26701.4	529.31		1086.14	11.3532
mSPB	0.9216	27300.7	26691.5	609.159		1361.31	12.3095
dSPB	0.9216	28124.9	26934.1	1190.72		1123.21	24.6865
mSPB	0.9216	26701.4	26594.6	106.782		711.917	59.1984
dSPB	0.9216	28267.1	26926.7	1340.38		1726.01	16.7897
mSPB	0.9216	26507.3	26442.9	64.3492		877.698	553.905
dSPB	0.9216	27621.3	26732.5	888.806		1446.69	72.6667
mSPB	0.9216	26987.1	26538.7	448.46		546.921	-13.9802
dSPB	0.9216	28829.2	27207.9	1621.29		979.187	54.369
mSPB	0.9216	26418.8	26342.1	76.7341		1710.08	41.6865
dSPB	0.9216	27833.6	26747.5	1086.14		818.155	448.194
mSPB	0.9216	26219.4	26208	11.3532		394.266	180.381
dSPB	0.9216	28345.4	26984.1	1361.31		891.425	476.278
mSPB	0.9216	26424.9	26412.6	12.3095		721.829	465.996
dSPB	0.9216	28005.6	26882.4	1123.21		721.369	81.0397
mSPB	0.9216	26420.5	26395.8	24.6865		1060.9	134.964
dSPB	0.9216	27275.2	26563.2	711.917		1589.78	81.8294
mSPB	0.9216	26291.6	26232.4	59.1984		637.421	648.579
dSPB	0.9216	28964.2	27238.2	1726.01		775.329	154.861
mSPB	0.9216	26389.6	26372.8	16.7897		1370.24	42.6151
dSPB	0.9216	27445.1	26567.4	877.698		447.385	651.369
mSPB	0.9216	27129.8	26575.9	553.905		1075.28	41.254
dSPB	0.9216	28112.7	26666	1446.69		955.937	27.4524
mSPB	0.9216	26442.4	26369.7	72.6667		1141.85	37.8611
dSPB	0.9216	27253.8	26706.9	546.921		1515.68	247.377
mSPB	0.9216	26380.6	26394.5	-13.9802		1195.63	10.4722
dSPB	0.9216	27791.5	26812.3	979.187		1222.2	104.508
mSPB	0.9216	26364.8	26310.5	54.369
dSPB	0.9216	28572.8	26862.8	1710.08
mSPB	0.9216	26133.2	26091.5	41.6865
dSPB	0.9216	27508.1	26689.9	818.155
mSPB	0.9216	26887.2	26439	448.194
dSPB	0.9216	26728.2	26333.9	394.266
mSPB	0.9216	26522.9	26342.5	180.381
dSPB	0.9216	27610.4	26719	891.425
mSPB	0.9216	27159.3	26683	476.278
dSPB	0.9216	27280.2	26558.4	721.829
mSPB	0.9216	26860.6	26394.6	465.996
dSPB	0.9216	27320.6	26599.2	721.369
mSPB	0.9216	26300.9	26219.8	81.0397
dSPB	0.9216	27819.1	26758.2	1060.9
mSPB	0.9216	26485.5	26350.5	134.964
dSPB	0.9216	28852.8	27263	1589.78
mSPB	0.9216	26365.5	26283.6	81.8294
dSPB	0.9216	27233	26595.6	637.421
mSPB	0.9216	27297.5	26648.9	648.579
dSPB	0.9216	27403.7	26628.4	775.329
mSPB	0.9216	26483.4	26328.5	154.861
dSPB	0.9216	28199.4	26829.2	1370.24
mSPB	0.9216	26294	26251.4	42.6151
dSPB	0.9216	26855.8	26408.4	447.385
mSPB	0.9216	27285.3	26634	651.369
dSPB	0.9216	27924.4	26849.1	1075.28
mSPB	0.9216	26205.9	26164.6	41.254
dSPB	0.9216	27636.5	26680.5	955.937
mSPB	0.9216	26241.7	26214.2	27.4524
dSPB	0.9216	27829.9	26688.1	1141.85
mSPB	0.9216	26278.4	26240.5	37.8611
dSPB	0.9216	28686.4	27170.7	1515.68
mSPB	0.9216	26605.3	26357.9	247.377
dSPB	0.9216	27924.1	26728.4	1195.63
mSPB	0.9216	26277.7	26267.3	10.4722
dSPB	0.9216	27984.2	26762	1222.2
mSPB	0.9216	26354.2	26249.7	104.508

## Sheet: BFA1-GFP misaligned
BFA1-GFP kar9∆ cells with misaligned spindle
	area	mean FI SPB	mean FI background	mean FI corrected		mean FI corrected
SPB1	0.9216	26811.5	26601.8	209.742		SPB1	SPB2	p-value (dSPB vs mSPB):	0.894206
SPB2	0.9216	26795.3	26503.7	291.619		209.742	291.619
SPB1	0.9216	26587.6	26405.2	182.369		182.369	141.377
SPB2	0.9216	26523.3	26381.9	141.377		388.925	232.552
SPB1	0.9216	27200.4	26811.5	388.925		436.548	370.948
SPB2	0.9216	26613.2	26380.6	232.552		230.04	337.944
SPB1	0.9216	26916.3	26479.8	436.548		460.175	316.19
SPB2	0.9216	26725.8	26354.9	370.948		158.77	214.044
SPB1	0.9216	26536.1	26306.1	230.04		257.321	312.024
SPB2	0.9216	26846.4	26508.5	337.944		226.385	180.663
SPB1	0.9216	26920.1	26460	460.175		184.706	251.496
SPB2	0.9216	26638.8	26322.6	316.19		289.56	419.865
SPB1	0.9216	26374.8	26216	158.77		221.639	197.802
SPB2	0.9216	26490.5	26276.4	214.044		156.79	197.575
SPB1	0.9216	26537.2	26279.9	257.321		228.313	99.5437
SPB2	0.9216	26744.4	26432.4	312.024
SPB1	0.9216	26425.8	26199.4	226.385
SPB2	0.9216	26393.1	26212.4	180.663
SPB1	0.9216	26489.8	26305.1	184.706
SPB2	0.9216	26612.9	26361.4	251.496
SPB1	0.9216	26575.9	26286.4	289.56
SPB2	0.9216	26798	26378.1	419.865
SPB1	0.9216	26534.6	26313	221.639
SPB2	0.9216	26643.7	26445.9	197.802
SPB1	0.9216	26586.1	26429.3	156.79
SPB2	0.9216	26462.1	26264.5	197.575
SPB1	0.9216	26709.5	26481.2	228.313
SPB2	0.9216	26336.2	26236.7	99.5437
