# Supplementary material for: A FRET-based study reveals site-specific regulation of spindle position checkpoint proteins at yeast centrosomes
Source: eLife journal article supplement (doi:10.7554/elife.14029), 2016-05-09
Supplement: supp [file elife_poa_e14029_Figure_4_source_data_2.xls]

## Sheet: repetition 1
P=0,51
	Bfa1-GFP	bg		pRS-SPC72 Δspc72				Bfa1-GFP	bg		Δspc72
	31043551	24279490		6764061				29183959	24231572		4952387
	27482510	24264898		3217612				30078082	24572592		5505490
	27722611	24058797		3663814				29503939	25179939		4324000
	30289123	24251592		6037531				34582285	24901244		9681041
	30277041	24162836		6114205				26340836	24226389		2114447
	29091980	24153857		4938123				27860061	24281367		3578694
	27149572	24060307		3089265				28269000	24423775		3845225
	27020551	24127203		2893348				27394531	24065611		3328920
	29159285	24065857		5093428				29119877	23984877		5135000
	26656307	23892082		2764225				29770244	24247266		5522978
	26628633	23869918		2758715				29305715	24664939		4640776
	28595307	24091020		4504287				30045348	24586428		5458920
	27811428	24064041		3747387				31243143	24334041		6909102
	34413754	24168000		10245754				28726428	24299816		4426612
	32349285	24225877		8123408				30433143	24380266		6052877
	31764389	24061326		7703063				28708408	24112611		4595797
	32448611	24043572		8405039				30218734	25353041		4865693
	35405266	24393490		11011776				30785551	24246693		6538858
	28550000	24028244		4521756				30770307	24281611		6488696
	27431367	23900102		3531265				31336061	24555877		6780184
	27729918	23959531		3770387				29932633	24634428		5298205
	27952389	23920123		4032266				27633898	24133389		3500509
	28985041	23965836		5019205				27905980	24415061		3490919
	31393510	24035000		7358510				27391877	24368918		3022959
	28761326	24118592		4642734				28767326	24180184		4587142
	29081918	23983123		5098795				27164143	24220816		2943327
	30277531	24033715		6243816				30807490	24683551		6123939
	28749797	23910816		4838981				32530918	24582816		7948102
	28300572	23857877		4442695				27191143	24373551		2817592
	30582285	23926734		6655551				28828939	24153918		4675021
	28197877	23877123		4320754				26352307	23874756		2477551
	33225980	25070225		8155755				32113082	24528123		7584959
	30842551	24949898		5892653				30024143	23963041		6061102
	30799877	24863510		5936367				31395877	23884756		7511121
	30440490	25982592		4457898				30962244	24052164		6910080
	29115203	25892898		3222305				29109123	23866123		5243000
	29163756	25415020		3748736				27832348	23921490		3910858
	32620041	25352551		7267490				31029143	24042449		6986694
	33011367	24935592		8075775				31648082	25453061		6195021
	29831674	24883775		4947899				31659102	25146428		6512674
								32851082	24973734		7877348
								32620041	25352551		7267490
								28480857	24990918		3489939
								27803674	25131531		2672143
								27854123	24853102		3001021
								30233184	24931693		5301491
								27598715	24900082		2698633
								34104613	25104428		9000185
								28989531	24872061		4117470
								29145959	24932408		4213551

## Sheet: repetition 2
P=0,34
	Bfa1-GFP	bg		pRS-SPC72 Δspc72			Bfa1-GFP	bg		Δspc72
	2966	2205		761			2929	2271		658
	2921	2199		722			3192	2263		929
	3014	2202		812			3156	2260		896
	3036	2210		826			3272	2264		1008
	2887	2195		692			2977	2254		723
	2975	2181		794			3239	2287		952
	3062	2197		865			2899	2284		615
	3172	2200		972			2973	2259		714
	3172	2203		969			3044	2281		763
	3077	2194		883			2913	2269		644
	2808	2188		620			3095	2263		832
	2845	2184		661			3073	2256		817
	2853	2173		680			3167	2258		909
	2928	2188		740			3103	2302		801
	2855	2193		662			2996	2215		781
	2854	2190		664			3061	2308		753
	2922	2195		727			3191	2381		810
	2969	2185		784			3169	2398		771
	2887	2197		690			3331	2353		978
	2895	2183		712			2942	2263		679
	2891	2184		707			3018	2292		726
	2833	2187		646			2913	2275		638
	2987	2190		797			2815	2200		615
	2815	2197		618			2931	2202		729
	2996	2177		819			2915	2212		703
	2928	2186		742			2867	2207		660
	2851	2186		665			2912	2216		696
	2890	2181		709			2878	2236		642
	2968	2179		789			2969	2217		752
	2980	2181		799			3002	2237		765
	2895	2184		711			2946	2198		748
	2937	2189		748			2960	2234		726
	2924	2182		742			2810	2196		614
	2846	2186		660			2949	2194		755
	2781	2186		595			2988	2213		775
	3193	2179		1014			3071	2204		867
	3016	2182		834			3196	2347		849
	2875	2184		691			3245	2341		904
	2873	2189		684			3184	2316		868
