# Supplementary figures and images for: A FRET-based study reveals site-specific regulation of spindle position checkpoint proteins at yeast centrosomes
Source: eLife journal article supplement (doi:10.7554/elife.14029), 2016-05-09

Figure 1- Figure Supplement 3

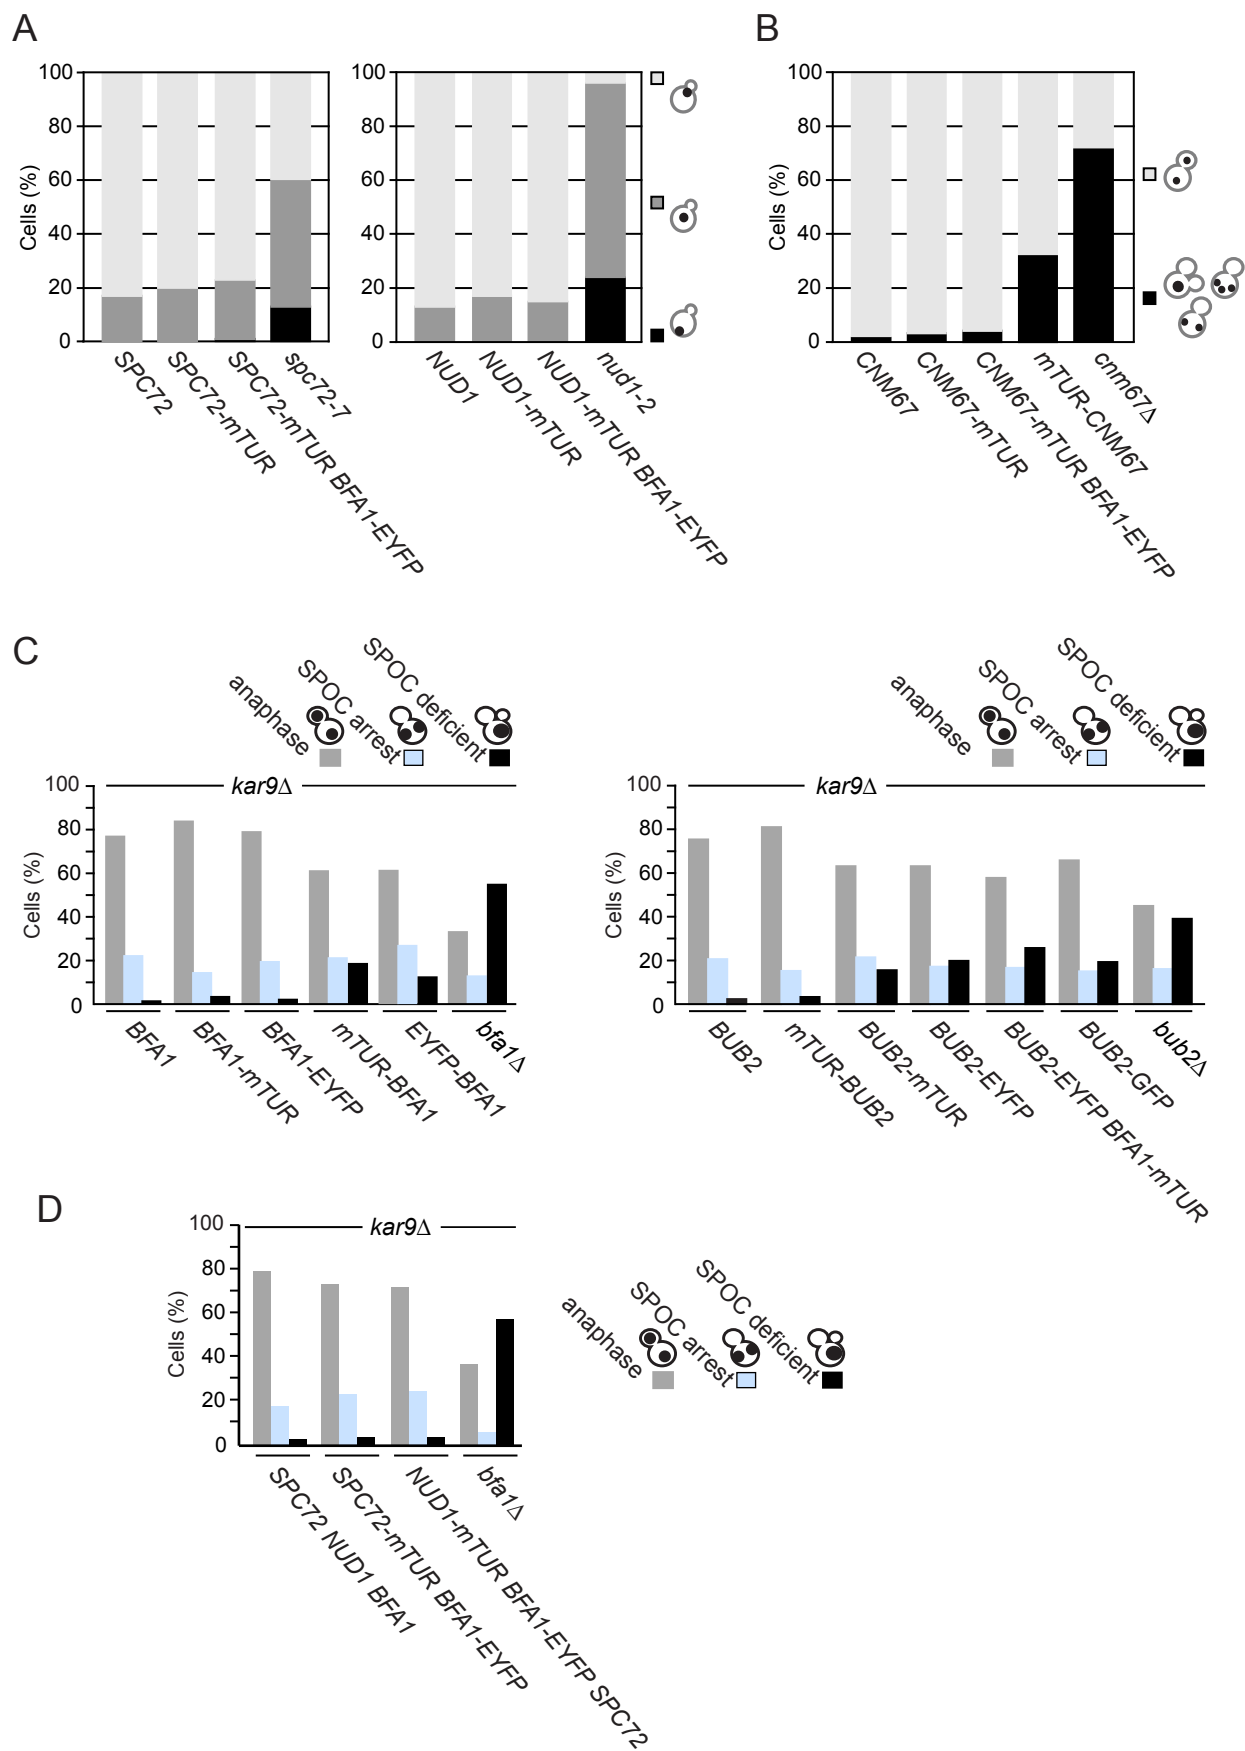

Supplement: supp [file elife-14029-supp-v1.zip]

Figure 3- Figure Supplement 1

A

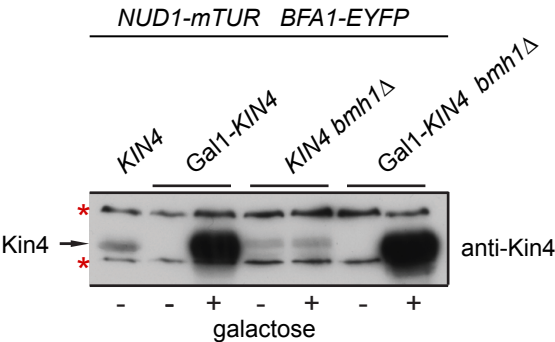

\* unspecific band

B

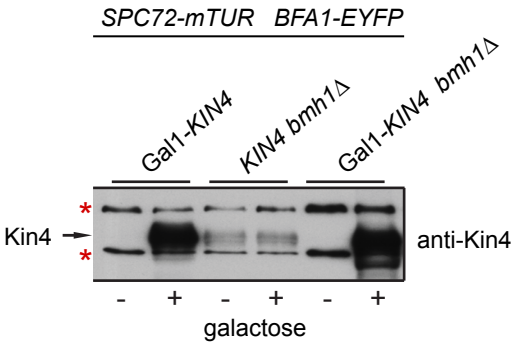

Supplement: supp [file elife-14029-supp-v1.zip]

Figure 2- Figure Supplement 1

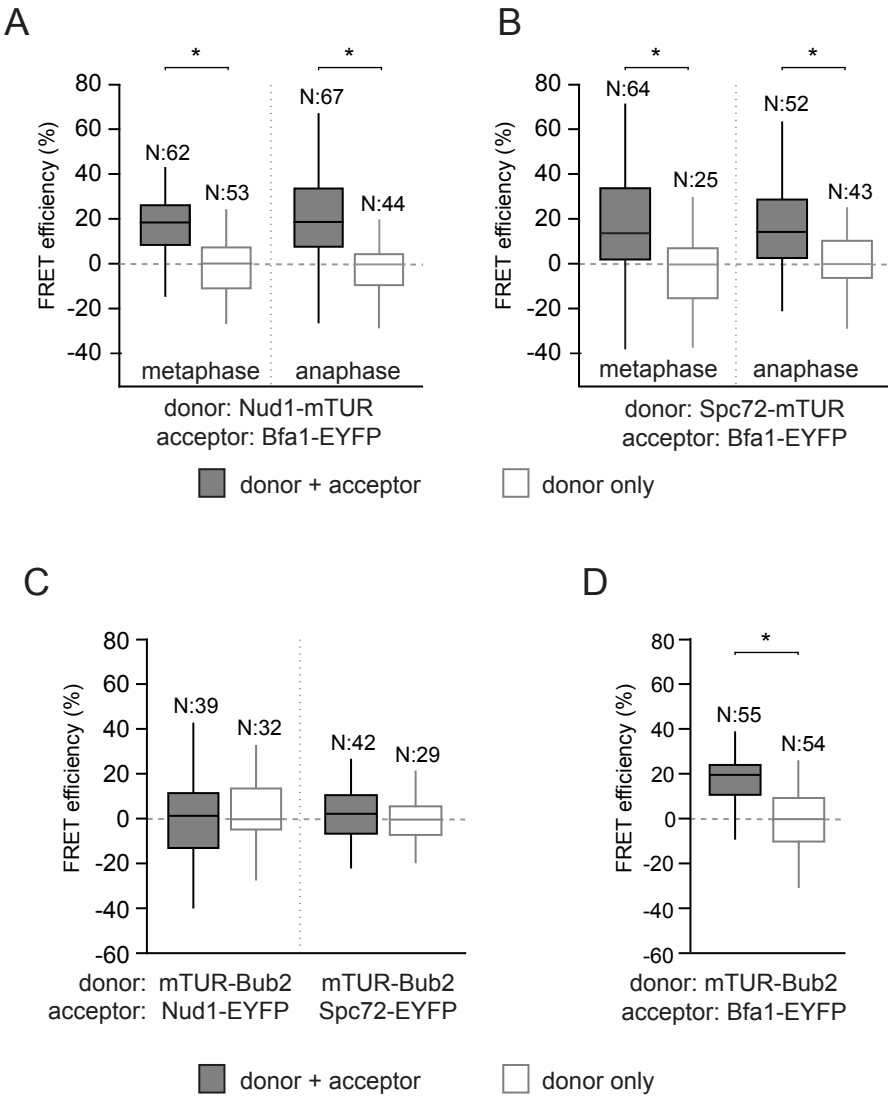

Supplement: supp [file elife-14029-supp-v1.zip]

Figure 6- Figure Supplement 1

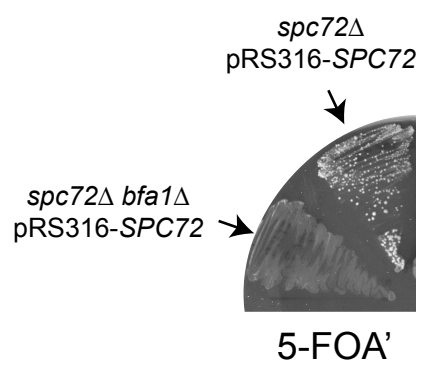

Supplement: supp [file elife-14029-supp-v1.zip]

Figure 1- Figure Supplement 1

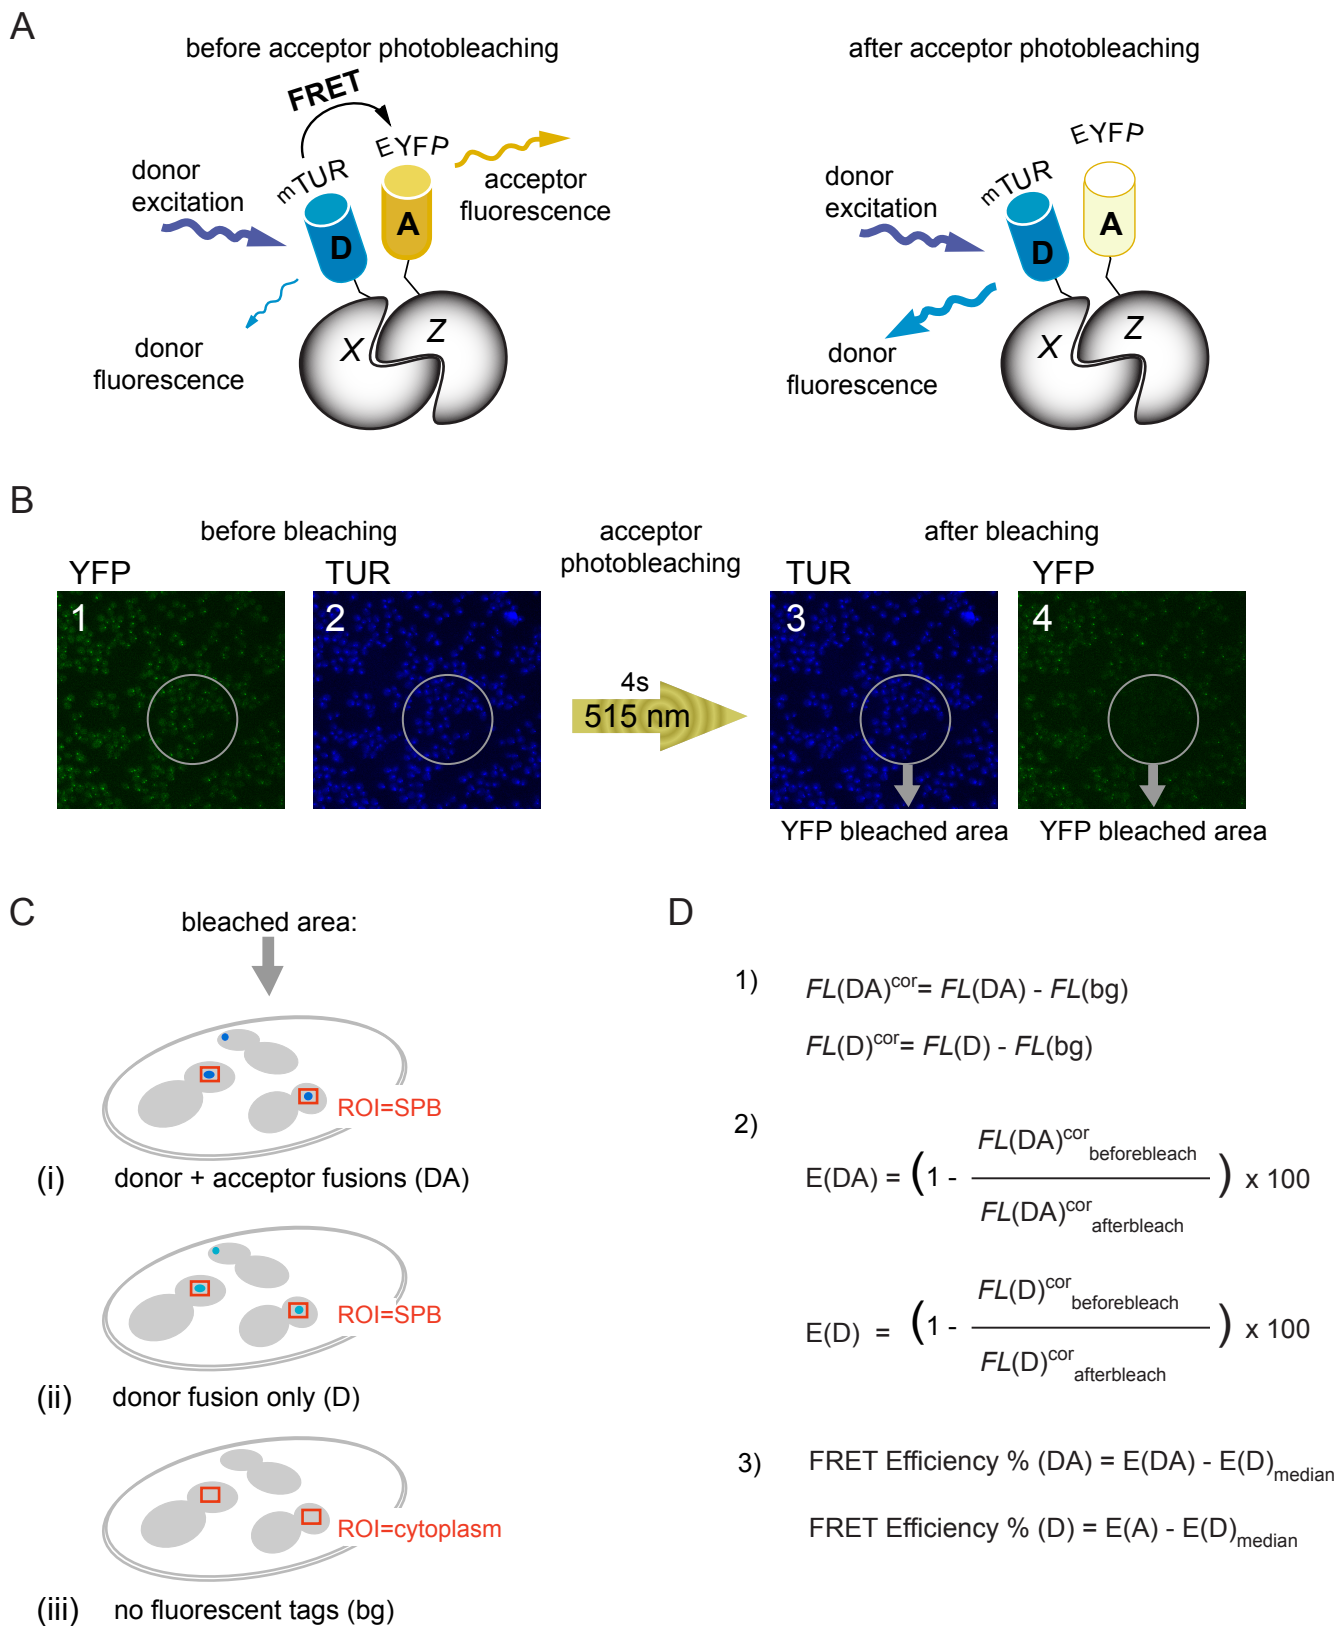

Supplement: supp [file elife-14029-supp-v1.zip]

Figure 1- Figure Supplement 2

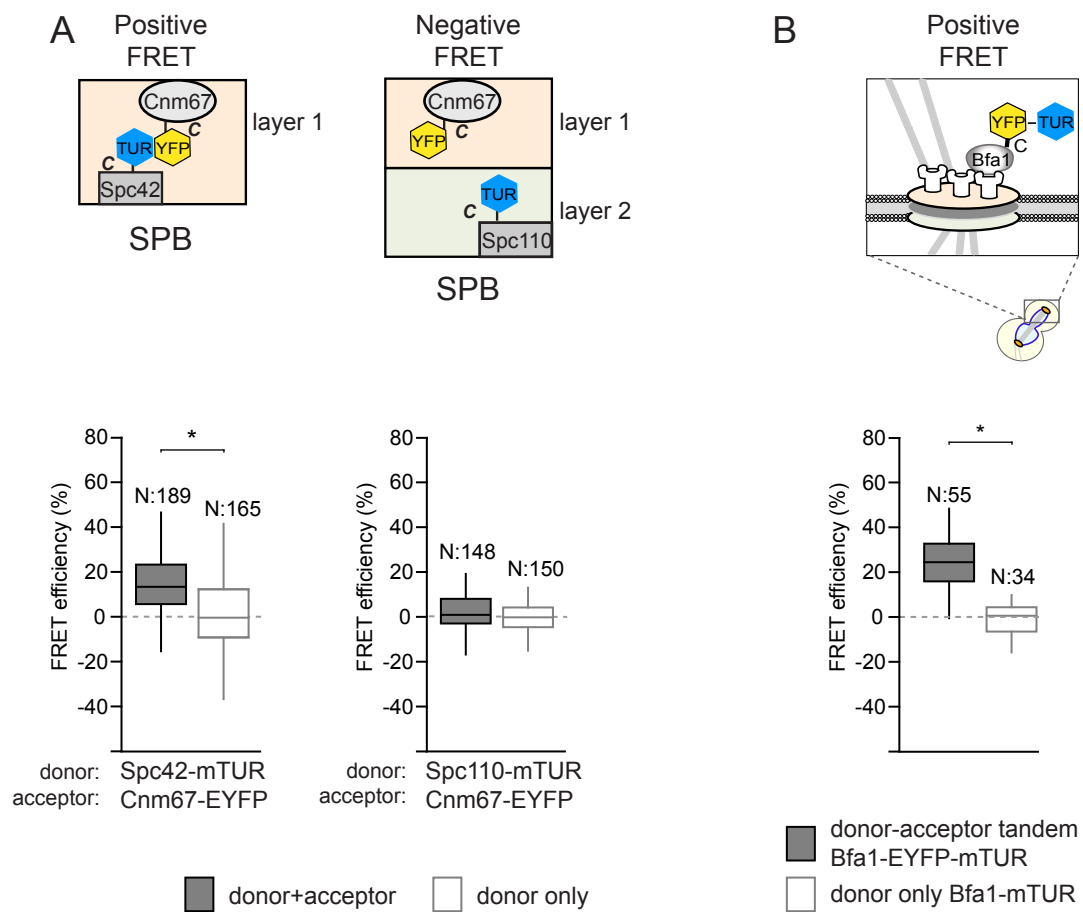

Supplement: supp [file elife-14029-supp-v1.zip]
